# Supplementary material for: Mental health problems among hotline callers during the early stage of COVID-19 pandemic
Source: PeerJ. 2022 May 23;10:e13419. doi: 10.7717/peerj.13419 (PMC9135033; doi:10.7717/peerj.13419)
Supplement: Supplemental Information 1 [file peerj-10-13419-s001.xls]

## Sheet: sample
codenum	syscode	telnumb	location	start.date	start.time	dursec	numbcall	source	diffresp	respABC	othnum1	othnum2	operator	typecall	priortx1	priortx2	priordx	currtx	currdrg	hopeful.start	ache.start	plan.start	intent.start	sex	age	school	marital	work	loctime	quality.assess	depsev	prioratt	anxiety.per	effect.subst	dx1	dx2	dx3	dx4	dx5	dx6	chronle	acutele	illness	abused	fearviol	famsuic	risk.per	reliable	complete.eval
297697	201901210226	18156588658	11	20190121	14:24:16	3944	1	18	1001	1001	999999999999999	999999999999999	401	1	1	9	10	1	1	50	80	1	0	2	36	99	1	52	5	1	87	2	999	1	32	40	99	99	99	99	1	1	2	2	2	1	9	2	2
297693	201901210256	15927527190	21	20190121	14:09:26	2271	1	18	1001	1001	999999999999999	999999999999999	412	1	1	9	10	1	1	40	65	2	60	2	30	18	1	38	1	1	999	99	999	9	99	99	99	99	99	99	9	9	9	9	9	9	999	9	3
297648	201901210324	13202274885	14	20190121	03:42:49	3699	1	18	1001	1001	999999999999999	999999999999999	391	1	1	9	10	1	1	50	100	2	90	1	25	15	1	38	50	1	43	1	999	1	30	40	99	99	99	99	2	1	2	2	2	2	6	3	2
297671	201901210555	18277203550	15	20190121	09:32:52	1441	3	18	1001	1001	999999999999999	999999999999999	409	1	6	9	11	5	1	0	100	4	100	1	28	15	2	38	50	1	999	99	999	9	99	99	99	99	99	99	9	9	9	9	9	9	999	9	3
297678	201901210644	15399921992	22	20190121	12:04:19	3815	1	11	1001	1001	999999999999999	999999999999999	410	1	1	9	10	1	1	0	0	3	85	2	32	12	2	38	10	1	72	0	999	1	32	40	99	99	99	99	2	1	1	2	2	1	7	3	2
297672	201901210888	13834798960	31	20190121	10:15:39	3026	1	18	1001	1001	999999999999999	999999999999999	410	1	1	9	10	1	1	50	80	2	50	2	21	14	1	70	50	1	53	0	999	1	31	40	99	99	99	99	2	2	2	2	2	2	4	3	2
297683	201901211378	13161359696	10	20190121	09:18:10	3225	2	18	1001	1001	999999999999999	999999999999999	377	1	1	9	10	9	9	25	85	3	65	1	27	19	1	38	5	1	94	1	999	1	32	40	99	99	99	99	1	1	2	1	2	2	9	2	7
297679	201901211521	13921788862	24	20190121	12:38:28	2303	1	18	1001	1001	999999999999999	999999999999999	408	1	1	9	10	1	1	999	999	1	0	1	40	18	2	39	50	1	999	99	999	9	99	99	99	99	99	99	9	9	9	9	9	9	999	9	3
297660	201901211609	13968845566	39	20190121	08:21:12	2730	1	18	1001	1001	999999999999999	999999999999999	410	1	5	9	10	1	1	999	100	2	80	1	38	16	4	39	50	1	999	99	999	9	99	99	99	99	99	99	9	9	9	9	9	9	999	9	3
297638	201901211611	19919882013	10	20190121	00:27:35	3650	3	18	1001	1001	18435991503	999999999999999	411	1	6	2	11	1	1	10	95	2	90	1	22	16	1	39	60	1	74	0	999	1	32	40	99	99	99	99	1	1	1	2	1	1	10	3	2
297700	201901211768	15055027141	11	20190121	14:47:45	807	1	18	1001	1001	999999999999999	999999999999999	409	1	6	9	24	5	1	999	999	2	999	1	20	12	1	70	99	1	999	99	999	9	99	99	99	99	99	99	9	9	9	9	9	9	999	9	4
297646	201901212440	18042014301	39	20190121	03:22:13	857	1	18	1001	1001	999999999999999	999999999999999	391	1	9	9	99	9	9	999	999	9	999	1	25	99	1	99	99	1	999	99	999	9	99	99	99	99	99	99	9	9	9	9	9	9	999	9	4
297726	201901214100	17816596793	39	20190121	22:22:33	3666	1	18	1001	1001	999999999999999	999999999999999	389	1	5	9	26	1	1	8	55	1	0	2	20	12	1	70	50	1	79	0	999	1	32	40	99	99	99	99	1	1	1	2	1	2	9	2	2
297707	201901214102	17701377880	10	20190121	15:19:01	2512	1	18	1001	1001	999999999999999	999999999999999	410	1	6	9	11	1	1	1	100	6	100	2	32	18	1	38	70	1	93	5	999	1	32	40	99	99	99	99	1	1	2	2	2	1	12	3	2
297694	201901214173	13755048870	22	20190121	13:39:42	2827	1	11	1001	1001	999999999999999	999999999999999	410	1	1	9	10	1	1	50	75	1	0	1	28	10	1	38	8	1	44	3	999	1	30	40	99	99	99	99	2	1	2	2	2	2	5	3	2
297665	201901215777	13020000630	10	20190121	09:10:34	4961	1	18	1001	1001	999999999999999	999999999999999	408	1	1	9	10	1	1	0	999	4	80	2	33	18	2	44	50	1	72	1	999	1	32	40	99	99	99	99	1	2	2	2	2	1	9	3	2
297647	201901216032	15975130782	14	20190121	02:48:15	3727	1	18	1001	1001	999999999999999	999999999999999	332	1	5	9	26	1	1	12	92	2	78	1	18	11	1	70	50	1	79	2	999	1	32	40	99	99	99	99	1	1	2	2	2	1	9	2	2
297699	201901216191	13330544830	38	20190121	14:51:14	3619	1	11	1001	1001	999999999999999	999999999999999	408	1	1	9	10	1	1	999	70	1	0	1	28	15	2	52	50	1	40	0	999	1	31	40	99	99	99	99	1	1	2	2	2	1	5	3	2
297670	201901216277	18626085413	24	20190121	09:46:30	3845	1	18	1001	1001	999999999999999	999999999999999	401	1	1	9	10	1	1	50	65	1	0	1	20	12	1	21	2	1	53	1	999	1	31	40	99	99	99	99	1	2	2	2	2	1	7	2	2
297681	201901216396	18729512663	32	20190121	12:49:31	3801	1	18	1001	1001	999999999999999	999999999999999	401	1	1	9	10	1	1	10	90	2	90	1	22	16	1	70	50	1	72	6	999	1	32	40	99	99	99	99	1	1	2	1	1	1	11	2	2
297682	201901217014	15277352903	15	20190121	13:14:33	2154	1	18	1001	1001	999999999999999	999999999999999	412	1	2	9	10	1	1	40	80	2	60	2	21	15	1	70	50	1	62	0	999	1	32	40	99	99	99	99	1	1	2	1	2	2	8	3	2
297657	201901218193	17690890824	37	20190121	07:04:20	5556	1	18	1001	1001	999999999999999	999999999999999	332	1	6	5	11	5	2	0	100	7	100	1	22	9	1	44	50	1	100	20	999	1	32	40	99	99	99	99	1	2	2	2	2	1	10	3	2
297658	201901218518	13717613821	10	20190121	08:21:36	1685	1	13	1001	1001	999999999999999	999999999999999	401	1	6	9	13	1	4	0	70	1	0	1	48	12	4	52	50	1	999	99	999	9	99	99	99	99	99	99	9	9	9	9	9	9	999	9	3
297717	201901218585	18738306364	19	20190121	19:46:53	3592	1	18	1001	1001	999999999999999	999999999999999	404	1	1	9	10	1	1	4	95	2	97	2	22	15	1	38	50	1	92	0	999	1	32	40	99	99	99	99	2	2	2	2	2	1	5	2	2
297676	201901218862	15382531185	39	20190121	11:53:58	3382	1	18	1001	1001	999999999999999	999999999999999	412	1	7	2	13	1	1	50	25	1	0	2	35	9	1	52	50	1	8	0	999	1	30	40	99	99	99	99	2	2	2	2	2	2	1	3	2
297714	201901219862	13752321570	35	20190121	16:37:40	3570	2	18	1001	1001	999999999999999	999999999999999	403	1	1	1	10	1	1	60	80	2	10	2	32	16	1	52	50	1	71	0	999	1	31	40	99	99	99	99	1	1	1	2	1	1	9	2	2
297643	201901219942	17635762968	10	20190121	02:17:39	668	1	18	1001	1001	999999999999999	999999999999999	332	1	9	9	99	9	9	999	999	1	0	1	24	16	1	38	1	1	999	99	999	9	99	99	99	99	99	99	9	9	9	9	9	9	999	9	4
297771	201901220279	13247565975	14	20190122	14:27:12	2087	3	18	1001	1001	999999999999999	999999999999999	401	1	5	9	26	1	1	30	100	2	50	2	18	11	1	70	50	1	75	0	999	1	31	40	99	99	99	99	1	1	2	2	2	1	6	2	6
297788	201901220352	13795697857	34	20190122	21:36:54	2631	1	18	1001	1001	999999999999999	999999999999999	410	1	6	9	24	1	1	30	60	2	70	1	19	12	1	52	7	1	999	99	999	9	99	99	99	99	99	99	9	9	9	9	9	9	999	9	3
297778	201901220542	18369821603	30	20190122	16:53:58	2312	1	14	1001	1001	999999999999999	999999999999999	408	1	3	9	26	1	1	999	90	2	999	1	29	16	1	21	50	1	999	99	999	9	99	99	99	99	99	99	9	9	9	9	9	9	999	9	3
297734	201901221207	18690388092	37	20190122	05:37:08	1028	1	11	1001	1001	999999999999999	999999999999999	404	1	1	9	10	1	1	999	999	1	0	2	18	11	1	70	1	1	999	99	999	9	99	99	99	99	99	99	9	9	9	9	9	9	999	9	4
297784	201901221797	16670151307	22	20190122	18:24:13	3796	1	18	1001	1001	999999999999999	999999999999999	410	1	1	9	10	1	1	25	75	2	90	2	28	9	1	21	2	1	75	3	999	1	32	40	99	99	99	99	2	1	2	2	2	2	7	3	2
297775	201901222325	13642066076	35	20190122	15:01:12	2789	1	18	1001	1001	999999999999999	999999999999999	388	1	1	9	10	1	1	999	20	6	999	2	31	12	1	52	50	1	999	99	999	9	99	99	99	99	99	99	9	9	9	9	9	9	999	9	3
297759	201901222922	15758036890	38	20190122	12:37:57	3289	3	18	1001	1001	999999999999999	999999999999999	412	1	6	9	11	1	1	0	40	1	0	1	18	12	1	70	50	1	45	1	999	1	32	40	99	99	99	99	1	1	2	2	2	1	6	3	2
297739	201901222924	13290651179	18	20190122	08:30:43	1993	2	18	1001	1001	999999999999999	999999999999999	401	1	3	9	24	1	1	0	75	2	999	2	40	9	1	21	50	1	70	1	999	1	31	40	99	99	99	99	1	1	2	1	2	1	8	1	6
297792	201901222983	15316128350	38	20190122	23:30:12	3170	1	18	1001	1001	999999999999999	999999999999999	408	1	6	5	11	1	1	10	90	2	60	1	20	13	1	70	50	1	48	2	999	1	31	40	99	99	99	99	1	1	2	1	2	1	9	3	2
297730	201901223524	18298889912	13	20190122	03:15:21	2108	3	18	1001	1001	18394601104	17770046549	389	1	6	9	11	5	2	10	65	2	100	2	19	13	1	70	2	1	999	99	999	9	99	99	99	99	99	99	9	9	9	9	9	9	999	9	4
297747	201901223677	18132455517	18	20190122	09:46:22	2970	1	11	1001	1001	999999999999999	999999999999999	388	1	6	9	24	1	1	90	60	1	0	1	32	19	2	38	3	1	36	0	999	1	30	40	99	99	99	99	1	1	2	2	1	1	6	3	2
297787	201901223807	13141234073	10	20190122	21:16:28	2198	1	18	1001	1001	999999999999999	999999999999999	408	1	1	9	10	1	1	10	25	1	0	1	32	18	2	38	9	1	33	0	999	1	30	40	99	99	99	99	2	2	2	2	2	2	1	3	2
297753	201901223817	13070179488	10	20190122	10:33:52	730	1	18	1001	1001	999999999999999	999999999999999	412	1	6	9	11	9	9	999	999	9	999	1	23	16	1	52	50	1	999	99	999	9	99	99	99	99	99	99	9	9	9	9	9	9	999	9	4
297740	201901224016	15815692675	14	20190122	08:56:35	3387	1	18	1001	1001	999999999999999	999999999999999	396	1	1	9	10	1	1	60	70	1	0	2	23	12	1	38	3	1	51	0	999	1	30	40	99	99	99	99	1	2	2	2	2	2	3	2	2
297732	201901224660	13864982993	30	20190122	04:38:51	3670	1	18	1001	1001	999999999999999	999999999999999	387	1	1	9	10	1	1	50	100	2	50	1	28	11	1	42	50	1	26	0	999	1	31	40	99	99	99	99	2	1	2	2	2	2	5	3	2
297743	201901224759	17801227959	10	20190122	09:23:57	1790	1	18	1001	1001	999999999999999	999999999999999	383	1	1	9	10	1	1	999	80	2	65	1	20	13	1	70	2	1	45	0	999	1	30	40	99	99	99	99	1	1	1	2	1	1	8	3	2
297779	201901224835	19925456953	30	20190122	16:26:57	3567	1	11	1001	1001	999999999999999	999999999999999	409	1	5	9	25	1	7	35	75	2	80	1	21	14	1	70	4	1	77	1	999	1	32	40	99	99	99	99	1	1	2	2	1	1	10	2	2
297777	201901224891	17720169691	35	20190122	16:15:56	1374	1	18	1001	1001	999999999999999	999999999999999	335	1	1	9	10	1	1	0	100	6	80	2	33	9	1	35	50	1	999	99	999	9	99	99	99	99	99	99	9	9	9	9	9	9	999	9	4
297754	201901224971	15534896986	31	20190122	11:33:55	3325	1	18	1001	1001	999999999999999	999999999999999	396	1	1	9	10	1	1	50	999	1	0	1	50	12	4	60	50	1	74	0	999	1	32	40	99	99	99	99	1	2	1	2	2	2	4	2	2
297761	201901225101	15166529230	30	20190122	12:05:44	3499	1	18	1001	1001	999999999999999	999999999999999	360	1	8	9	11	1	2	999	999	2	999	1	27	16	1	39	50	1	68	0	999	1	32	40	99	99	99	99	2	1	2	2	2	2	4	2	2
297763	201901225315	16604301296	23	20190122	13:09:51	3547	1	18	1001	1001	999999999999999	999999999999999	401	1	1	9	10	1	1	70	0	1	0	2	24	15	1	38	50	1	43	0	999	1	30	40	99	99	99	99	1	2	2	2	2	1	2	2	2
297731	201901225726	18768135767	39	20190122	04:11:07	1482	1	18	1001	1001	999999999999999	999999999999999	404	1	1	9	10	1	1	56	83	2	53	1	21	15	1	38	50	1	999	1	999	9	30	40	99	99	99	99	9	9	9	9	9	9	2	9	5
297768	201901226024	13621332259	10	20190122	14:03:13	3683	1	18	1001	1001	999999999999999	999999999999999	412	1	1	9	10	1	1	0	90	2	50	2	32	16	1	38	50	1	90	0	999	5	32	40	99	99	99	99	1	2	2	2	2	2	6	3	2
297789	201901226394	15094916261	30	20190122	22:49:10	2132	1	18	1001	1001	999999999999999	999999999999999	408	1	6	9	25	1	1	25	65	1	0	2	28	11	1	21	1	1	62	0	999	1	32	40	99	99	99	99	2	2	2	2	2	2	3	3	2
297793	201901226594	18774905407	22	20190122	23:22:34	3943	1	18	1001	1001	999999999999999	999999999999999	335	1	6	9	11	5	4	40	90	7	90	2	23	12	1	38	60	1	86	1	999	1	32	40	99	99	99	99	1	2	2	2	2	2	9	3	2
297728	201901226604	18829892437	32	20190122	01:10:12	3631	1	18	1001	1001	999999999999999	999999999999999	389	1	6	9	24	1	1	50	40	2	100	2	23	15	1	52	50	1	57	0	999	1	32	40	99	99	99	99	1	1	2	1	2	1	8	2	2
297741	201901227284	15104677179	20	20190122	08:53:55	2036	1	18	1001	1001	999999999999999	999999999999999	388	1	6	9	14	1	1	35	65	1	0	1	33	9	1	52	50	1	999	1	999	9	30	40	99	99	99	99	9	9	9	9	9	9	1	9	5
297780	201901227383	17725201225	32	20190122	16:16:59	3449	1	18	1001	1001	999999999999999	999999999999999	410	1	6	2	13	1	1	0	100	3	99	2	19	9	1	52	60	1	72	99	999	1	32	40	99	99	99	99	1	2	2	2	2	2	5	3	2
297762	201901227595	18255450209	11	20190122	13:09:31	3528	3	18	1001	1001	999999999999999	999999999999999	360	1	7	6	13	5	4	60	80	2	70	1	25	16	1	35	50	1	48	0	999	1	31	40	99	99	99	99	2	1	2	2	1	1	6	3	2
297729	201901227615	15994340441	15	20190122	01:12:35	2528	1	18	1001	1001	999999999999999	999999999999999	403	1	1	1	10	1	1	0	999	7	80	2	32	15	1	38	50	1	70	1	999	1	32	40	99	99	99	99	2	1	2	2	2	2	9	2	2
297752	201901228599	18845819397	20	20190122	10:28:10	2035	1	18	1001	1001	999999999999999	999999999999999	383	1	6	9	24	1	1	100	100	6	50	1	18	12	1	70	50	1	66	20	999	1	30	40	99	99	99	99	1	1	2	1	1	1	13	3	2
297766	201901228925	18394518229	13	20190122	13:57:36	3345	1	15	1001	1001	999999999999999	999999999999999	396	1	6	9	25	1	1	30	30	1	0	1	21	15	1	70	50	1	52	0	999	1	30	40	99	99	99	99	1	2	2	1	1	2	5	2	2
297785	201901229555	18925387668	14	20190122	18:28:13	2773	1	18	1001	1001	999999999999999	999999999999999	408	1	1	9	10	1	1	75	55	1	0	1	31	15	2	33	7	1	22	0	999	1	30	40	99	99	99	99	2	2	2	2	2	2	1	3	2
297764	201901229560	18877942431	14	20190122	13:05:59	2452	1	18	1001	1001	999999999999999	999999999999999	383	1	1	9	10	1	1	0	40	1	0	2	23	9	1	44	60	1	76	0	999	5	32	40	99	99	99	99	1	1	2	2	1	1	9	3	2
297736	201901229903	15879591552	25	20190122	07:37:24	1137	1	18	1001	1001	999999999999999	999999999999999	404	1	1	9	10	1	1	999	100	1	0	2	25	16	1	40	50	1	999	99	999	9	99	99	99	99	99	99	9	9	9	9	9	9	999	9	4
297836	201901230425	17695653170	19	20190123	14:25:10	3099	1	11	1001	1001	999999999999999	999999999999999	402	1	6	9	11	5	8	50	80	2	50	2	20	12	1	52	50	1	83	0	999	1	32	40	99	99	99	99	2	1	2	2	2	1	7	2	2
297837	201901230480	18231013021	18	20190123	15:16:37	3070	1	18	1001	1001	999999999999999	999999999999999	383	1	1	9	10	1	1	0	90	2	90	2	37	16	4	39	50	1	67	3	999	1	31	40	99	99	99	99	1	1	2	2	2	2	8	3	2
297830	201901231104	13624235566	26	20190123	13:46:10	3495	1	18	1001	1001	999999999999999	999999999999999	385	1	6	9	11	1	1	0	100	2	100	2	18	12	1	70	50	1	88	0	999	1	32	40	99	99	99	99	1	2	2	2	2	2	5	2	2
297813	201901231245	18374975355	22	20190123	09:38:21	2961	1	18	1001	1001	999999999999999	999999999999999	396	1	1	9	10	1	1	80	50	1	0	1	23	17	1	70	50	1	64	0	999	1	32	40	99	99	99	99	2	1	2	1	2	2	5	2	2
297812	201901231295	17721248383	33	20190123	09:31:19	1029	1	18	1001	1001	999999999999999	999999999999999	402	1	9	9	99	9	9	999	999	9	999	2	23	12	1	52	2	1	999	99	999	9	99	99	99	99	99	99	9	9	9	9	9	9	999	9	4
297806	201901232286	17679369036	24	20190123	05:30:49	3244	1	18	1001	1001	999999999999999	999999999999999	408	1	1	9	10	1	1	999	50	2	45	2	23	12	1	44	2	1	64	0	999	1	32	40	99	99	99	99	1	1	2	2	2	2	6	3	2
297808	201901232317	13409188466	32	20190123	08:06:23	3305	1	18	1001	1001	999999999999999	999999999999999	396	1	1	9	10	1	1	50	70	1	0	2	34	12	2	22	50	1	47	0	999	1	32	40	99	99	99	99	1	2	2	2	2	2	3	2	2
297850	201901232834	15643215867	23	20190123	17:44:53	3538	1	18	1001	1001	999999999999999	999999999999999	412	1	1	9	10	1	1	0	85	4	80	2	28	16	1	38	50	1	57	0	999	1	30	40	99	99	99	99	2	1	1	2	2	1	8	3	2
297821	201901233441	18629981377	39	20190123	10:32:56	850	2	18	1001	1001	999999999999999	999999999999999	402	1	9	9	99	9	9	999	999	9	999	2	30	16	2	38	70	1	999	99	999	9	99	99	99	99	99	99	9	9	9	9	9	9	999	9	4
297855	201901233511	13687825909	15	20190123	19:10:35	2568	2	11	1001	1001	999999999999999	999999999999999	401	1	1	9	10	1	1	50	50	1	0	1	18	9	1	21	50	1	69	0	999	1	32	40	99	99	99	99	1	1	2	2	1	2	8	2	2
297870	201901233655	15616817355	22	20190123	23:45:43	1189	1	99	1001	1001	999999999999999	999999999999999	401	1	9	9	99	9	9	50	70	1	0	1	21	15	1	70	99	1	999	99	999	9	99	99	99	99	99	99	9	9	9	9	9	9	999	9	4
297807	201901235171	15768100880	14	20190123	06:59:26	4374	1	18	1001	1001	999999999999999	999999999999999	335	1	1	9	10	1	1	30	90	4	90	2	22	9	1	52	50	1	86	0	999	1	32	40	99	99	99	99	1	2	2	2	2	2	8	3	2
297871	201901235393	15817777719	14	20190123	23:10:38	2588	1	18	1001	1001	999999999999999	999999999999999	377	1	6	9	11	1	1	100	0	1	0	2	32	8	1	52	10	1	999	99	999	9	99	99	99	99	99	99	9	9	9	9	9	9	999	9	3
297822	201901235411	13780898081	30	20190123	10:39:34	846	1	18	1001	1001	999999999999999	999999999999999	383	1	6	9	11	5	2	10	95	2	80	1	18	12	1	70	50	1	999	99	999	9	99	99	99	99	99	99	9	9	9	9	9	9	999	9	3
297863	201901235444	18019889600	11	20190123	21:44:02	2988	1	18	1001	1001	999999999999999	999999999999999	412	1	1	9	10	1	1	50	90	2	80	1	25	16	1	44	50	1	92	2	999	5	32	40	99	99	99	99	1	1	2	1	2	2	9	3	2
297819	201901235526	17831107983	10	20190123	10:28:02	2482	2	18	1001	1001	999999999999999	999999999999999	385	1	1	9	10	1	1	0	70	2	40	1	19	11	1	43	50	1	76	1	999	1	32	40	99	99	99	99	1	1	1	2	2	2	9	2	2
297882	201901235637	15333332164	18	20190123	21:36:25	3467	1	18	1001	1001	999999999999999	999999999999999	377	1	5	9	24	1	1	10	90	2	90	1	26	16	4	38	50	1	69	0	999	1	32	40	99	99	99	99	2	1	2	2	2	2	6	2	2
297801	201901235833	15246070422	10	20190123	02:06:00	3479	1	18	1001	1001	999999999999999	999999999999999	335	1	6	9	25	1	2	40	75	2	90	1	19	13	1	70	15	1	63	2	999	1	31	40	99	99	99	99	1	1	2	2	2	1	9	3	2
297869	201901236572	15247135998	27	20190123	23:14:54	2998	3	18	1001	1001	999999999999999	999999999999999	412	1	1	9	10	1	1	40	55	2	60	1	18	12	1	70	60	1	84	0	999	1	32	40	99	99	99	99	2	1	2	2	2	1	7	3	2
297848	201901236643	15013974321	14	20190123	17:10:45	3611	1	18	1001	1001	999999999999999	999999999999999	401	1	1	9	10	1	1	20	65	2	80	2	18	13	1	70	4	1	34	0	999	1	30	40	99	99	99	99	1	1	2	2	2	2	6	2	2
297861	201901237855	18036430271	24	20190123	21:38:46	3144	1	18	1001	1001	999999999999999	999999999999999	316	1	1	9	10	1	1	70	95	2	90	2	32	15	1	52	50	1	58	0	999	1	32	40	99	99	99	99	1	2	2	2	2	1	5	3	2
297859	201901238177	15850786595	33	20190123	20:33:21	3295	1	18	1001	1001	999999999999999	999999999999999	316	1	1	9	10	1	1	0	90	2	65	1	21	16	1	70	50	1	70	0	999	1	32	40	99	99	99	99	1	1	2	2	2	1	8	3	2
297829	201901238411	15699084008	37	20190123	12:47:22	3022	1	18	1001	1001	999999999999999	999999999999999	396	1	6	7	16	1	1	50	65	1	0	2	53	15	2	40	50	1	56	0	999	1	30	40	99	99	99	99	1	1	1	2	2	2	7	2	2
297833	201901238538	18704800976	27	20190123	13:50:53	3435	2	10	1001	1001	999999999999999	999999999999999	383	1	6	7	11	1	1	0	85	2	80	1	46	9	2	52	50	1	92	1	999	1	32	40	99	99	99	99	1	2	2	2	2	2	6	3	2
297810	201901238572	15847069557	27	20190123	08:50:16	2424	1	18	1001	1001	999999999999999	999999999999999	383	1	1	9	10	1	1	999	5	1	0	2	29	16	1	38	50	1	39	0	999	1	30	40	99	99	99	99	2	1	2	2	2	2	2	3	2
297866	201901238733	15771837887	32	20190123	19:07:59	2965	1	14	1001	1001	999999999999999	999999999999999	377	1	1	9	10	1	1	40	98	1	0	1	20	12	1	70	50	1	65	0	999	1	32	40	99	99	99	99	2	2	2	2	2	2	4	2	2
297852	201901239735	13652106646	35	20190123	16:33:46	3485	1	14	1001	1001	999999999999999	999999999999999	377	1	5	9	24	1	1	0	89	2	60	2	18	11	1	70	50	1	65	0	999	1	32	40	99	99	99	99	1	1	2	2	1	2	8	2	2
297828	201901239828	17622652120	35	20190123	12:29:24	3317	1	18	1001	1001	999999999999999	999999999999999	402	1	1	9	10	1	1	25	90	1	0	2	33	15	1	38	50	1	74	0	999	1	32	40	99	99	99	99	2	1	2	2	2	2	5	2	2
297892	201901240187	17573045466	22	20190124	08:53:24	2179	1	18	1001	1001	999999999999999	999999999999999	406	1	1	1	10	1	1	20	50	2	50	2	23	15	1	35	6	1	66	0	999	4	32	40	99	99	99	99	1	1	2	2	2	1	9	2	2
297937	201901240199	18626275239	24	20190124	17:54:41	2979	1	18	1001	1001	999999999999999	999999999999999	386	1	5	6	12	1	1	35	80	2	100	1	27	16	1	38	6	1	999	0	999	9	30	40	99	99	99	99	9	9	9	9	9	9	1	9	5
297888	201901240933	18547780779	27	20190124	08:36:06	2463	1	18	1001	1001	999999999999999	999999999999999	404	1	6	9	25	1	2	999	80	1	0	2	18	11	1	70	50	1	68	0	999	1	32	40	99	99	99	99	2	2	2	2	2	1	3	2	2
297873	201901240988	15273795806	22	20190124	00:14:39	3684	2	18	1001	1001	999999999999999	999999999999999	401	1	3	9	10	1	1	50	60	1	0	1	21	15	1	70	50	1	63	0	999	1	32	40	99	99	99	99	1	1	2	2	2	2	6	2	2
297951	201901241417	13029878521	20	20190124	21:43:41	2378	2	18	1001	1001	999999999999999	999999999999999	386	1	1	9	10	1	1	0	80	2	999	1	30	18	1	39	50	1	999	99	999	9	99	99	99	99	99	99	9	9	9	9	9	9	999	9	3
297899	201901241834	17621049288	39	20190124	10:07:08	2725	1	18	1001	1001	999999999999999	999999999999999	406	1	6	6	14	1	5	10	100	2	999	2	26	16	8	38	1	1	86	0	999	1	32	40	99	99	99	99	2	2	2	2	2	2	4	2	2
297878	201901241907	18392138561	32	20190124	01:55:29	3178	1	18	1001	1001	999999999999999	999999999999999	412	1	1	9	10	1	1	10	75	1	0	2	30	9	3	43	5	1	57	0	999	1	30	40	99	99	99	99	1	2	2	2	2	2	5	3	2
297901	201901242320	17397247915	14	20190124	09:47:00	3585	1	18	1001	1001	999999999999999	999999999999999	409	1	1	9	10	1	1	50	100	2	70	2	18	9	1	38	4	1	76	0	999	1	32	40	99	99	99	99	1	1	2	1	1	1	10	2	2
297896	201901242402	18756698175	11	20190124	09:55:42	3586	1	18	1001	1001	999999999999999	999999999999999	404	1	6	5	11	1	1	999	999	2	999	1	29	10	1	43	50	1	999	99	999	9	99	99	99	99	99	99	9	9	9	9	9	9	999	9	4
297880	201901242558	13688773452	38	20190124	03:06:40	2871	1	18	1001	1001	999999999999999	999999999999999	377	1	1	9	10	1	1	5	100	5	50	1	23	12	1	38	50	1	999	2	999	9	30	40	99	99	99	99	9	9	9	9	9	9	1	9	5
297923	201901242717	18507131977	21	20190124	14:05:25	3793	1	18	1001	1001	999999999999999	999999999999999	409	1	1	9	10	1	1	5	100	4	100	2	39	15	4	33	17	1	84	0	999	1	31	40	99	99	99	99	2	2	2	2	2	2	7	2	2
297911	201901242829	17860723007	30	20190124	13:14:39	3209	1	18	1001	1001	999999999999999	999999999999999	404	1	5	9	26	1	1	3	999	2	80	1	20	13	1	70	50	1	67	0	999	1	32	40	99	99	99	99	2	2	2	2	2	1	4	2	2
297910	201901242954	18861750853	33	20190124	13:10:37	1454	1	18	1001	1001	999999999999999	999999999999999	406	1	1	1	10	1	1	0	60	2	70	1	22	15	1	35	60	1	84	0	999	1	32	40	99	99	99	99	1	1	2	2	1	2	8	2	2
297898	201901242981	15901331190	10	20190124	09:45:01	3541	1	18	1001	1001	999999999999999	999999999999999	385	1	1	9	10	1	1	50	75	1	0	2	30	15	1	38	50	1	39	0	999	1	30	40	99	99	99	99	1	1	2	2	2	2	5	2	2
297877	201901243101	18941225958	26	20190124	01:36:17	5183	1	88	1001	1001	999999999999999	999999999999999	401	1	6	5	23	1	1	999	95	4	90	1	18	11	1	70	50	1	77	4	999	1	32	40	99	99	99	99	1	2	1	1	2	1	12	2	2
297944	201901243310	18045258796	20	20190124	19:43:23	1165	1	18	1001	1001	999999999999999	999999999999999	383	1	1	9	10	1	1	10	90	5	80	1	18	12	1	70	50	1	999	1	999	9	30	40	99	99	99	99	9	9	9	9	9	9	1	9	5
297949	201901243421	17886740609	17	20190124	21:20:07	3325	1	18	1001	1001	999999999999999	999999999999999	396	1	3	9	26	1	1	0	100	2	85	1	20	13	1	70	50	1	88	0	999	1	32	40	99	99	99	99	1	2	2	2	2	2	5	2	2
297922	201901243671	18502286096	35	20190124	15:08:24	2139	1	18	1001	1001	999999999999999	999999999999999	385	1	1	9	10	1	1	60	30	1	0	2	26	16	1	38	6	1	58	0	999	9	32	40	99	99	99	99	9	9	9	9	9	9	1	9	5
297876	201901244074	18610068182	10	20190124	00:40:06	3086	1	18	1001	1001	999999999999999	999999999999999	412	1	7	9	12	5	6	999	90	2	50	1	30	15	1	52	50	1	81	3	999	4	32	40	99	99	99	99	1	2	2	2	2	1	6	3	2
297945	201901244654	13810875685	10	20190124	19:32:29	4791	1	18	1001	1001	999999999999999	999999999999999	402	1	1	9	10	1	1	60	80	2	40	2	35	19	2	38	10	1	65	0	999	1	32	40	99	99	99	99	2	1	1	2	2	1	6	2	2
297916	201901244671	15589897056	30	20190124	14:28:03	3137	1	18	1001	1001	999999999999999	999999999999999	404	1	1	9	10	1	1	15	80	2	70	2	35	11	2	43	50	1	69	0	999	1	30	40	99	99	99	99	1	2	2	2	2	2	5	2	2
297935	201901244881	15355043460	39	20190124	17:46:46	2039	2	13	1001	1001	999999999999999	999999999999999	396	1	6	7	13	1	1	999	60	2	999	2	26	9	1	52	50	1	999	99	999	9	99	99	99	99	99	99	9	9	9	9	9	9	999	9	3
297879	201901245445	17699030599	37	20190124	03:41:43	3472	2	18	1001	1001	999999999999999	999999999999999	316	1	1	9	10	1	1	70	80	1	0	2	18	11	1	70	50	1	54	0	999	3	31	40	99	99	99	99	1	2	2	2	1	2	5	3	2
297884	201901245518	17858369710	39	20190124	06:40:31	2698	1	14	1001	1001	999999999999999	999999999999999	412	1	7	5	11	5	2	50	65	2	50	1	20	14	1	70	50	1	999	99	999	9	99	99	99	99	99	99	9	9	9	9	9	9	999	9	3
297933	201901245592	17380333077	34	20190124	17:05:21	2631	1	16	1001	1001	999999999999999	999999999999999	383	1	6	9	11	1	1	55	100	6	100	1	44	15	2	52	50	1	100	2	999	5	32	40	99	99	99	99	2	2	1	2	2	2	9	3	2
297900	201901245632	15960057096	12	20190124	10:01:39	3596	1	11	1001	1001	999999999999999	999999999999999	391	1	6	9	16	1	1	20	65	3	80	1	21	13	1	70	50	1	59	2	999	1	30	40	99	99	99	99	1	1	2	2	2	2	8	3	2
297927	201901245640	18678186686	30	20190124	16:07:50	3565	1	13	1001	1001	999999999999999	999999999999999	386	1	5	9	24	4	1	99	80	1	0	1	47	12	2	32	50	1	22	0	999	1	30	40	99	99	99	99	2	1	2	2	2	1	4	2	2
297952	201901246490	15093531102	19	20190124	23:08:36	3686	1	18	1001	1001	999999999999999	999999999999999	386	1	1	9	10	1	1	100	90	1	0	2	24	16	1	44	5	1	32	0	999	1	30	40	99	99	99	99	1	2	2	2	2	2	2	2	2
297895	201901247581	18343756846	23	20190124	09:23:53	641	1	18	1001	1001	999999999999999	999999999999999	409	1	9	9	99	9	9	999	999	1	0	2	18	9	1	52	50	1	999	99	999	9	99	99	99	99	99	99	9	9	9	9	9	9	999	9	4
297913	201901247895	18862712893	24	20190124	12:45:54	3124	1	18	1001	1001	999999999999999	999999999999999	391	1	1	9	10	1	1	80	50	1	0	2	32	9	2	44	50	1	999	99	999	9	99	99	99	99	99	99	9	9	9	9	9	9	999	9	3
297955	201901247917	13349417862	20	20190124	23:23:02	3666	1	18	1001	1001	999999999999999	999999999999999	402	1	1	9	10	1	1	50	100	6	70	2	27	9	1	52	50	1	100	1	999	1	32	40	99	99	99	99	1	1	2	2	2	2	8	2	2
297942	201901248472	13270472407	24	20190124	19:09:26	2816	1	18	1001	1001	999999999999999	999999999999999	386	1	5	9	24	1	1	20	75	2	65	1	20	15	1	70	3	1	76	0	999	1	32	40	99	99	99	99	1	1	2	2	2	2	7	2	2
297954	201901248753	17761597047	18	20190124	23:48:56	1312	1	11	1001	1001	999999999999999	999999999999999	360	1	1	9	10	1	1	999	92	2	999	2	18	11	1	70	50	1	999	99	999	9	99	99	99	99	99	99	9	9	9	9	9	9	999	9	4
297953	201901248926	15189807693	34	20190124	23:12:17	1879	1	18	1001	1001	999999999999999	999999999999999	383	1	1	9	10	1	1	5	40	1	0	2	23	16	1	38	60	1	68	0	999	2	32	40	99	99	99	99	1	1	1	2	2	1	7	3	2
297917	201901249862	15086800994	40	20190124	14:06:08	1923	2	18	1001	1001	999999999999999	999999999999999	385	1	1	9	10	1	1	0	100	2	100	1	22	16	1	52	50	1	73	0	999	1	32	40	99	99	99	99	2	2	2	1	2	1	4	3	6
297991	201901250099	13878106195	15	20190125	12:41:21	4773	1	18	1001	1001	999999999999999	999999999999999	388	1	6	9	11	1	1	55	95	4	90	1	19	13	1	70	3	1	50	0	999	1	30	40	99	99	99	99	1	1	2	2	1	2	10	3	2
298002	201901250694	15124707057	27	20190125	13:27:28	3577	1	18	1001	1001	999999999999999	999999999999999	403	1	6	9	24	1	1	80	70	1	0	1	31	19	2	38	50	1	76	0	999	1	32	40	99	99	99	99	1	1	2	1	1	1	8	2	2
298034	201901251087	15002056830	14	20190125	23:45:21	4670	1	18	1001	1001	999999999999999	999999999999999	390	1	1	1	10	1	1	0	0	1	0	2	23	15	1	38	3	1	49	0	999	1	32	40	99	99	99	99	1	2	2	2	2	2	2	3	2
298033	201901251294	18848892390	19	20190125	23:37:29	2631	1	18	1001	1001	999999999999999	999999999999999	404	1	1	9	10	1	1	50	70	1	0	2	21	14	1	70	50	1	86	0	999	1	32	40	99	99	99	99	2	2	2	2	2	1	4	2	2
297966	201901251372	18881035172	21	20190125	07:03:44	2994	1	16	1001	1001	999999999999999	999999999999999	396	1	1	9	10	1	1	0	30	1	0	1	19	13	1	70	60	1	49	0	999	1	30	40	99	99	99	99	1	1	2	2	2	2	4	2	2
297984	201901251635	15606005388	33	20190125	09:54:37	3982	1	18	1001	1001	999999999999999	999999999999999	388	1	6	9	11	1	1	0	55	1	0	1	22	15	1	52	60	1	58	2	999	4	30	40	99	99	99	99	2	1	1	1	2	1	10	3	2
297963	201901252237	13260154757	10	20190125	05:25:24	1147	2	18	1001	1001	999999999999999	999999999999999	360	1	1	9	10	1	1	999	999	9	999	2	18	10	1	70	1	1	999	99	999	9	99	99	99	99	99	99	9	9	9	9	9	9	999	9	4
298019	201901252625	17639322197	30	20190125	19:09:04	684	1	18	1001	1001	999999999999999	999999999999999	390	1	1	1	10	1	1	999	999	2	999	1	18	12	1	35	2	1	999	99	999	9	99	99	99	99	99	99	9	9	9	9	9	9	999	9	4
298012	201901253153	19972919348	21	20190125	17:22:06	2989	1	18	1001	1001	999999999999999	999999999999999	315	1	6	9	11	1	1	0	100	2	50	1	19	12	1	52	50	1	67	0	999	1	32	40	99	99	99	99	1	2	2	2	2	2	5	3	2
297981	201901253196	18694048269	21	20190125	09:28:00	3509	1	18	1001	1001	999999999999999	999999999999999	406	1	1	1	10	1	1	999	80	5	70	2	27	16	2	38	20	1	93	0	999	1	32	40	99	99	99	99	2	2	2	2	2	2	6	2	2
298005	201901253942	17679390474	25	20190125	14:43:42	1389	1	18	1001	1001	999999999999999	999999999999999	387	1	1	9	10	1	1	100	70	1	0	2	18	11	1	70	50	1	999	99	999	9	99	99	99	99	99	99	9	9	9	9	9	9	999	9	4
297957	201901254597	17772180098	32	20190125	01:32:06	2210	1	18	1001	1001	999999999999999	999999999999999	386	1	5	9	24	1	1	60	70	1	0	1	25	15	1	35	3	1	53	0	999	1	30	40	99	99	99	99	1	1	2	2	2	2	5	2	2
298010	201901254797	18554693006	30	20190125	16:48:27	3508	1	18	1001	1001	999999999999999	999999999999999	390	1	1	1	10	1	1	999	50	1	0	1	36	16	2	40	50	1	60	1	999	1	32	40	99	99	99	99	1	2	2	2	2	2	4	3	2
298001	201901254984	18217291087	32	20190125	14:23:34	3360	1	18	1001	1001	999999999999999	999999999999999	406	1	6	6	11	5	2	50	80	3	80	2	27	15	1	35	60	1	86	0	999	5	32	40	99	99	99	99	1	2	2	2	2	1	7	2	2
298027	201901255045	18332053931	18	20190125	21:46:29	2988	1	18	1001	1001	999999999999999	999999999999999	385	1	1	9	10	1	1	30	90	1	0	1	19	13	1	70	1	1	86	0	999	3	32	40	99	99	99	99	1	2	2	2	2	1	6	2	2
297980	201901255203	13921002771	24	20190125	08:31:05	3362	1	18	1001	1001	999999999999999	999999999999999	391	1	3	9	26	1	1	0	100	2	85	1	28	16	5	44	50	1	22	0	999	1	30	40	99	99	99	99	2	1	2	2	2	1	6	3	2
297987	201901255311	1083809292	10	20190125	10:07:07	3684	1	18	1001	1001	999999999999999	999999999999999	391	1	6	9	13	5	4	35	25	1	0	1	34	10	1	52	50	1	56	0	999	3	31	40	99	99	99	99	1	2	2	2	2	2	4	3	2
298022	201901255350	15825719566	39	20190125	19:42:57	3627	1	18	1001	1001	999999999999999	999999999999999	404	1	6	9	12	1	1	0	80	1	0	1	33	16	2	35	4	1	47	1	999	1	31	40	99	99	99	99	2	2	2	2	1	2	4	2	2
297961	201901255573	15317522321	33	20190125	04:59:35	3336	1	18	1001	1001	999999999999999	999999999999999	396	1	2	9	24	1	1	70	90	2	5	2	21	15	1	70	50	1	28	4	999	1	30	40	99	99	99	99	2	2	1	2	2	2	4	2	2
297997	201901256025	18035760311	31	20190125	12:38:16	3644	1	18	1001	1001	999999999999999	999999999999999	387	1	6	3	25	1	1	40	98	1	0	1	30	16	4	38	50	1	67	0	999	1	32	40	99	99	99	99	1	1	1	2	2	2	7	3	2
297956	201901256834	13328305589	12	20190125	00:32:22	3153	1	18	1001	1001	999999999999999	999999999999999	360	1	1	9	10	1	1	999	80	2	80	1	21	15	1	70	3	1	65	0	999	1	32	40	99	99	99	99	2	1	2	2	1	2	6	3	2
298023	201901257646	15010907919	10	20190125	19:49:13	3701	1	18	1001	1001	999999999999999	999999999999999	315	1	1	9	10	1	1	30	70	2	35	1	22	15	1	70	50	1	80	0	999	1	32	40	99	99	99	99	2	1	2	2	2	2	6	3	2
298006	201901258156	13644241478	26	20190125	13:40:20	4548	1	11	1001	1001	999999999999999	999999999999999	411	1	1	9	10	1	1	0	60	6	70	2	25	16	4	44	2	1	89	0	999	1	32	40	99	99	99	99	2	2	2	2	2	1	5	3	2
297988	201901258589	15258815362	39	20190125	10:23:40	3450	1	18	1001	1001	999999999999999	999999999999999	387	1	6	7	11	1	1	10	999	1	0	1	20	5	1	38	2	1	65	1	999	3	32	40	99	99	99	99	1	1	2	1	2	2	8	3	2
298025	201901258666	13810236980	10	20190125	20:22:49	2487	11	18	1001	1001	999999999999999	999999999999999	385	1	5	9	11	1	1	0	60	1	0	1	35	16	1	35	50	1	999	99	999	9	99	99	99	99	99	99	9	9	9	9	9	9	999	9	3
297968	201901258780	18230302709	18	20190125	07:29:18	2526	2	18	1001	1001	999999999999999	999999999999999	383	1	6	9	12	5	3	55	85	1	0	2	43	9	2	21	50	1	999	99	999	9	99	99	99	99	99	99	9	9	9	9	9	9	999	9	3
298021	201901259173	13298527886	22	20190125	18:41:16	3620	1	18	1001	1001	999999999999999	999999999999999	385	1	1	9	10	1	1	5	50	2	80	1	23	9	1	52	50	1	78	1	999	1	32	40	99	99	99	99	1	2	1	2	2	2	7	2	2
298008	201901259198	18608898570	38	20190125	16:22:41	1511	1	18	1001	1001	999999999999999	999999999999999	404	1	7	6	25	1	2	0	90	6	85	2	27	12	1	52	50	1	999	1	999	9	30	40	99	99	99	99	9	9	9	9	9	9	1	9	5
298026	201901259287	15082664223	34	20190125	21:00:15	3460	1	18	1001	1001	999999999999999	999999999999999	404	1	7	6	13	1	1	10	999	2	75	1	18	10	1	70	50	1	32	0	999	1	30	40	99	99	99	99	2	2	2	2	1	2	3	2	2
298003	201901259410	15010601451	39	20190125	14:43:35	3130	1	18	1001	1001	999999999999999	999999999999999	388	1	1	9	10	1	1	40	75	1	0	1	19	12	1	70	50	1	72	0	999	1	30	40	99	99	99	99	1	2	2	2	2	2	4	3	2
297960	201901259857	13510171576	33	20190125	04:46:08	2432	1	18	1001	1001	999999999999999	999999999999999	383	1	1	9	10	1	1	15	100	2	55	2	24	17	1	70	60	1	90	0	999	1	32	40	99	99	99	99	2	2	1	2	2	2	5	3	2
298119	201901260066	18131718982	18	20190126	20:45:33	1745	1	18	1001	1001	999999999999999	999999999999999	411	1	5	9	26	1	1	100	65	2	30	1	20	14	1	70	50	1	999	99	999	9	30	40	99	99	99	99	9	9	9	9	9	9	0	9	5
298089	201901260386	15015829217	14	20190126	13:53:42	3686	1	18	1001	1001	999999999999999	999999999999999	387	1	2	9	24	1	1	80	100	1	0	2	34	9	2	52	50	1	60	0	999	1	31	40	99	99	99	99	2	1	2	2	1	2	5	2	2
298095	201901260564	13011397804	35	20190126	15:11:30	801	1	99	1001	1001	999999999999999	999999999999999	403	1	1	1	10	1	1	999	90	2	70	2	33	15	2	38	99	1	999	99	999	9	99	99	99	99	99	99	9	9	9	9	9	9	999	9	4
298128	201901261136	15662734711	30	20190126	23:05:10	2612	1	18	1001	1001	999999999999999	999999999999999	391	1	1	9	10	1	1	60	80	2	99	1	23	15	1	70	50	1	76	0	999	1	32	40	99	99	99	99	1	1	2	2	2	2	6	3	2
298046	201901261462	15014615073	14	20190126	06:41:11	4125	1	18	1001	1001	999999999999999	999999999999999	390	1	6	9	11	1	1	0	999	2	999	2	23	12	1	52	60	1	92	0	999	1	32	40	99	99	99	99	2	2	2	2	2	2	3	3	2
298066	201901261580	18032698661	18	20190126	10:28:50	2054	6	18	1001	1001	999999999999999	999999999999999	389	1	3	3	24	1	1	100	50	1	0	2	20	12	1	70	50	1	67	0	999	1	32	40	99	99	99	99	2	2	2	1	1	2	4	2	6
298122	201901261609	17319862243	32	20190126	22:10:14	2804	1	18	1001	1001	999999999999999	999999999999999	406	1	6	6	11	9	2	999	60	2	80	2	26	9	1	35	5	1	60	0	999	1	32	40	99	99	99	99	2	2	2	2	2	1	4	2	2
298045	201901261614	18620638008	14	20190126	05:18:27	3550	1	18	1001	1001	999999999999999	999999999999999	404	1	1	9	10	1	1	30	80	2	50	9	33	16	1	44	6	1	65	0	999	1	31	40	99	99	99	99	2	2	2	2	2	1	5	2	2
298065	201901262055	15941494308	26	20190126	10:47:49	1423	1	18	1001	1001	999999999999999	999999999999999	387	1	1	9	10	1	1	50	90	2	70	1	30	16	4	38	50	1	999	99	999	9	99	99	99	99	99	99	9	9	9	9	9	9	999	9	4
298051	201901262086	19892110189	22	20190126	08:42:48	3397	1	12	1001	1001	999999999999999	999999999999999	335	1	6	9	14	5	2	30	25	1	0	2	37	9	1	52	50	1	33	0	999	1	31	40	99	99	99	99	1	2	2	1	2	1	4	3	2
298077	201901262351	15049110060	27	20190126	12:58:03	743	1	99	1001	1001	999999999999999	999999999999999	408	1	9	9	99	9	9	999	999	9	999	2	23	15	1	70	99	1	999	99	999	9	99	99	99	99	99	99	9	9	9	9	9	9	999	9	4
298079	201901263513	13928690610	14	20190126	13:17:24	3068	1	18	1001	1001	999999999999999	999999999999999	408	1	1	9	10	1	1	999	999	4	70	1	30	16	1	44	10	1	999	99	999	9	99	99	99	99	99	99	9	9	9	9	9	9	999	9	3
298084	201901263649	17716206257	10	20190126	12:37:39	2950	5	18	1001	1001	999999999999999	999999999999999	389	1	6	6	13	5	4	50	2	1	0	2	20	13	1	70	50	1	28	2	999	1	30	40	99	99	99	99	1	2	2	1	2	2	5	2	2
298039	201901263806	18501372414	23	20190126	03:30:16	1676	1	18	1001	1001	999999999999999	999999999999999	315	1	1	9	10	1	1	10	50	1	0	1	24	15	1	70	50	1	72	0	999	1	32	40	99	99	99	99	1	2	2	2	2	2	4	3	2
298105	201901264094	17858365339	39	20190126	17:36:03	2847	1	18	1001	1001	999999999999999	999999999999999	406	1	1	1	10	1	1	0	95	2	50	1	22	13	1	70	19	1	61	0	999	1	30	40	99	99	99	99	1	1	2	2	2	1	8	2	2
298038	201901264206	17705650253	11	20190126	02:36:14	3424	1	18	1001	1001	999999999999999	999999999999999	385	1	1	9	10	1	1	70	60	1	0	2	29	15	2	52	50	1	61	0	999	1	30	40	99	99	99	99	1	2	2	2	1	2	4	2	2
298118	201901265039	17824234495	26	20190126	19:56:19	3672	1	18	1001	1001	999999999999999	999999999999999	332	1	6	5	11	5	2	0	50	2	50	1	23	16	1	70	50	1	999	0	999	9	30	40	99	99	99	99	9	9	9	9	9	9	0	9	5
298080	201901265055	18852654368	38	20190126	13:17:20	3378	1	18	1001	1001	999999999999999	999999999999999	388	1	6	9	11	1	1	5	80	2	45	2	18	9	1	44	50	1	57	0	999	1	31	40	99	99	99	99	1	2	2	1	2	2	6	3	2
298062	201901265209	13507429712	22	20190126	10:29:03	3564	1	18	1001	1001	999999999999999	999999999999999	408	1	6	5	11	5	2	0	100	2	95	2	18	12	1	70	50	1	92	3	999	4	32	40	99	99	99	99	1	1	2	2	1	1	11	3	2
298102	201901265412	15655218297	11	20190126	16:12:58	3185	2	18	1001	1001	999999999999999	999999999999999	391	1	1	9	10	1	1	100	30	1	0	2	36	19	2	44	50	1	7	0	999	1	30	40	99	99	99	99	1	1	2	2	2	1	4	3	2
298087	201901265913	13972356022	21	20190126	13:03:33	2903	1	18	1001	1001	999999999999999	999999999999999	403	1	6	9	11	1	1	20	90	2	90	2	29	16	1	52	50	1	75	1	999	1	32	40	99	99	99	99	2	2	2	2	2	1	6	2	2
298117	201901266849	19951656337	24	20190126	19:48:26	3539	1	18	1001	1001	999999999999999	999999999999999	391	1	1	9	10	1	1	999	90	2	100	2	23	15	1	39	50	1	78	0	999	1	32	40	99	99	99	99	1	2	2	2	1	2	5	3	2
298094	201901267984	15660962227	19	20190126	14:42:13	3620	1	18	1001	1001	999999999999999	999999999999999	335	1	6	5	11	1	1	10	100	3	99	2	21	12	1	52	1	1	83	0	999	1	32	40	99	99	99	99	1	1	2	1	1	2	9	3	2
298044	201901268055	15811350905	10	20190126	04:11:31	3652	1	18	1001	1001	999999999999999	999999999999999	315	1	6	9	25	5	6	40	90	1	0	1	25	15	1	52	50	1	87	0	999	1	32	40	99	99	99	99	1	2	2	2	2	1	5	2	2
298116	201901268085	15267971814	39	20190126	20:22:15	3104	6	18	1001	1001	999999999999999	999999999999999	406	1	6	6	11	1	1	65	70	2	95	1	22	12	1	52	50	1	999	4	999	9	30	40	99	99	99	99	9	9	9	9	9	9	2	9	5
298068	201901268214	13656150253	24	20190126	11:21:10	952	1	18	1001	1001	999999999999999	999999999999999	335	1	1	9	10	1	6	999	80	1	0	2	49	16	1	38	50	1	999	99	999	9	99	99	99	99	99	99	9	9	9	9	9	9	999	9	4
298037	201901268338	13164390706	14	20190126	01:59:44	3918	1	18	1001	1001	999999999999999	999999999999999	390	1	1	1	10	1	1	0	50	2	75	2	21	15	1	70	50	1	69	0	999	1	30	40	99	99	99	99	2	1	2	2	2	2	6	3	2
298093	201901268851	19866091150	14	20190126	14:40:48	3246	1	18	1001	1001	999999999999999	999999999999999	408	1	1	9	10	1	1	0	80	2	90	2	18	12	1	21	70	1	82	0	999	1	32	40	99	99	99	99	1	2	2	2	1	2	6	3	2
298064	201901269006	18306801231	31	20190126	10:09:55	2963	1	11	1001	1001	999999999999999	999999999999999	410	1	1	9	10	1	1	50	50	3	50	2	25	16	1	39	50	1	51	0	999	1	30	40	99	99	99	99	1	2	2	2	2	2	5	3	2
298091	201901269277	13812051000	24	20190126	14:26:11	790	3	18	1001	1001	999999999999999	999999999999999	335	1	5	9	26	1	1	999	999	9	999	1	18	11	1	70	50	1	31	0	999	1	30	40	99	99	99	99	1	2	2	2	1	1	4	2	6
298155	201901270352	13329883866	21	20190127	09:53:09	3672	1	16	1001	1001	999999999999999	999999999999999	412	1	6	9	11	5	2	50	90	2	60	2	38	9	2	52	50	1	90	0	999	1	32	40	99	99	99	99	1	2	2	2	2	2	5	2	2
298149	201901270563	18596153023	24	20190127	08:54:41	888	16	18	1001	1001	999999999999999	999999999999999	408	1	6	9	11	1	1	40	50	2	50	2	38	9	1	43	60	1	999	99	999	9	99	99	99	99	99	99	9	9	9	9	9	9	999	9	3
298141	201901270686	15859453158	12	20190127	06:01:08	3156	2	18	1001	1001	999999999999999	999999999999999	391	1	1	9	10	1	1	70	100	2	50	1	18	13	1	70	20	1	11	2	999	1	30	40	99	99	99	99	2	2	2	2	2	1	4	3	2
298140	201901270880	15087423973	38	20190127	05:59:06	2228	3	18	1001	1001	999999999999999	999999999999999	406	1	1	9	10	1	1	19	60	2	60	2	27	16	1	88	50	1	48	0	999	1	31	40	99	99	99	99	2	1	2	2	2	1	6	2	2
298190	201901271233	15043171903	23	20190127	17:05:34	2133	1	18	1001	1001	999999999999999	999999999999999	403	1	1	1	10	1	1	55	75	1	0	1	20	14	1	70	50	1	61	0	999	2	32	40	99	99	99	99	9	9	9	9	9	9	1	9	5
298175	201901271730	17801234981	10	20190127	14:26:44	2904	1	88	1001	1001	999999999999999	999999999999999	335	1	3	9	24	1	1	6	80	2	50	2	26	18	1	70	2	1	79	0	999	1	32	40	99	99	99	99	2	1	2	2	2	2	6	3	2
298197	201901271905	18863660093	30	20190127	20:39:57	2511	1	18	1001	1001	999999999999999	999999999999999	403	1	1	1	10	1	1	80	100	2	35	1	22	16	1	70	50	1	44	0	999	1	30	40	99	99	99	99	1	1	2	2	2	2	5	2	2
298145	201901272215	13522443453	10	20190127	08:22:57	3529	1	18	1001	1001	999999999999999	999999999999999	412	1	3	9	10	1	1	0	100	2	50	1	29	16	1	52	50	1	100	0	999	1	32	40	99	99	99	99	1	2	2	2	2	2	5	2	2
298198	201901272924	18210353253	25	20190127	21:49:30	3959	1	18	1001	1001	999999999999999	999999999999999	388	1	1	9	10	1	1	100	100	1	0	1	31	16	1	38	50	1	64	1	999	1	30	40	99	99	99	99	1	1	2	2	1	2	7	3	2
298164	201901273056	13581987909	10	20190127	12:17:50	3369	1	18	1001	1001	999999999999999	999999999999999	408	1	1	9	10	1	1	20	90	1	0	1	28	16	2	38	50	1	49	0	999	1	30	40	99	99	99	99	1	1	2	2	2	1	6	3	2
298130	201901273125	18382126840	34	20190127	00:42:47	985	1	99	1001	1001	999999999999999	999999999999999	332	1	1	9	10	1	1	999	999	1	0	2	22	9	1	35	50	1	999	99	999	9	99	99	99	99	99	99	9	9	9	9	9	9	999	9	4
298178	201901273186	17600495519	34	20190127	14:50:13	3139	1	18	1001	1001	999999999999999	999999999999999	401	1	6	9	11	1	1	20	85	2	60	1	19	15	1	70	50	1	76	2	999	1	32	40	99	99	99	99	1	1	2	2	2	1	9	2	2
298148	201901273468	18640671204	26	20190127	08:55:43	3510	1	18	1001	1001	999999999999999	999999999999999	335	1	1	9	10	1	1	30	90	1	90	2	28	15	1	52	60	1	85	1	999	1	32	40	99	99	99	99	1	2	2	1	2	1	8	3	2
298157	201901273891	13717748106	10	20190127	09:44:27	1839	1	18	1001	1001	999999999999999	999999999999999	377	1	6	7	11	1	1	0	90	1	0	2	40	12	2	52	50	1	999	99	999	9	99	99	99	99	99	99	9	9	9	9	9	9	999	9	3
298152	201901273914	18207298425	21	20190127	08:26:55	3019	1	18	1001	1001	999999999999999	999999999999999	409	1	6	9	13	5	4	0	50	2	30	2	30	15	1	52	50	1	78	0	999	2	32	40	99	99	99	99	1	1	2	2	1	2	8	2	2
298160	201901273989	15141878614	26	20190127	10:35:55	3008	1	18	1001	1001	999999999999999	999999999999999	335	1	1	9	10	1	1	50	80	2	95	1	21	15	1	70	50	1	78	0	999	1	32	40	99	99	99	99	1	1	2	2	2	1	8	3	2
298171	201901274772	18353152159	30	20190127	13:50:48	1332	1	18	1001	1001	999999999999999	999999999999999	335	1	1	9	10	1	1	60	100	2	50	2	18	11	1	70	50	1	999	0	999	9	30	40	99	99	99	99	9	9	9	9	9	9	1	9	5
298136	201901274977	18853102298	30	20190127	03:34:49	3206	2	18	1001	1001	999999999999999	999999999999999	406	1	6	5	11	5	2	50	80	2	10	1	20	14	1	70	2	1	57	4	999	1	30	40	99	99	99	99	2	1	2	1	2	1	9	2	2
298195	201901275065	18744362575	23	20190127	19:53:01	3654	2	18	1001	1001	999999999999999	999999999999999	389	1	5	9	24	1	1	30	100	1	0	1	24	16	1	35	50	1	82	0	999	1	32	40	99	99	99	99	2	1	2	2	1	2	6	2	2
298189	201901275073	15201291157	39	20190127	17:41:51	1590	11	12	1001	1001	999999999999999	999999999999999	387	1	7	5	12	4	2	999	999	1	0	2	23	15	1	70	50	1	999	99	999	9	99	99	99	99	99	99	9	9	9	9	9	9	999	9	3
298188	201901276371	18638517680	19	20190127	17:19:46	3665	2	18	1001	1001	999999999999999	999999999999999	388	1	1	9	10	1	1	5	85	2	50	1	20	14	1	70	50	1	26	0	999	1	30	40	99	99	99	99	1	1	2	2	2	2	6	3	2
298201	201901276411	13469999912	21	20190127	23:36:47	3655	1	18	1001	1001	999999999999999	999999999999999	389	1	6	9	12	1	1	0	0	2	100	1	26	12	1	44	50	1	63	1	999	2	32	40	99	99	99	99	2	1	2	2	2	1	7	2	2
298137	201901276558	15906748179	32	20190127	03:20:37	2389	1	18	1001	1001	999999999999999	999999999999999	391	1	1	9	10	1	1	0	0	2	85	2	20	9	1	52	50	1	999	99	999	9	30	40	99	99	99	99	9	9	9	9	9	9	0	9	5
298147	201901276665	13581546493	10	20190127	08:33:59	3168	1	18	1001	1001	999999999999999	999999999999999	401	1	6	9	11	1	2	90	80	1	0	2	35	18	2	52	50	1	69	0	999	1	32	40	99	99	99	99	1	1	2	2	2	2	6	2	2
298166	201901276710	13469724233	21	20190127	12:37:51	3599	1	18	1001	1001	999999999999999	999999999999999	401	1	6	9	11	1	1	50	999	1	0	1	20	16	1	70	50	1	69	3	999	2	32	40	99	99	99	99	1	1	2	1	2	1	9	2	2
298170	201901277056	15800355305	34	20190127	13:43:59	2302	1	18	1001	1001	999999999999999	999999999999999	412	1	1	9	10	1	6	0	100	2	95	1	34	9	2	52	50	1	85	0	999	1	32	40	99	99	99	99	2	2	2	2	2	1	5	2	2
298181	201901277476	15801824292	33	20190127	14:42:39	2781	1	18	1001	1001	999999999999999	999999999999999	409	1	1	9	10	1	1	0	98	6	0	1	18	10	1	38	50	1	84	2	999	1	32	40	99	99	99	99	2	1	2	1	2	2	8	2	2
298134	201901277544	13112577773	14	20190127	01:42:50	2559	1	18	1001	1001	999999999999999	999999999999999	411	1	1	9	10	1	1	50	999	1	0	2	19	12	1	44	50	1	50	0	999	1	30	40	99	99	99	99	2	1	2	2	2	2	4	3	2
298165	201901278800	15524444413	26	20190127	12:12:27	1656	1	18	1001	1001	999999999999999	999999999999999	335	1	1	9	10	1	1	10	70	2	60	1	19	12	1	70	50	1	999	99	999	9	99	99	99	99	99	99	9	9	9	9	9	9	999	9	3
298191	201901279213	13838240114	19	20190127	16:33:24	2568	2	18	1001	1001	999999999999999	999999999999999	389	1	8	9	26	1	1	10	90	6	50	2	22	12	2	38	19	1	999	99	999	9	99	99	99	99	99	99	9	9	9	9	9	9	999	9	4
298185	201901279992	15216661289	11	20190127	16:34:38	3615	1	18	1001	1001	999999999999999	999999999999999	387	1	1	9	10	1	1	100	60	2	40	1	20	16	1	21	50	1	60	0	999	1	32	40	99	99	99	99	1	1	2	1	2	2	7	3	2
298220	201901280032	18183454071	16	20190128	08:31:46	3669	1	18	1001	1001	999999999999999	999999999999999	401	1	1	9	10	1	1	50	80	2	40	2	20	13	1	70	50	1	68	0	999	1	30	40	99	99	99	99	2	1	2	2	2	2	6	2	2
298200	201901280153	18810510591	10	20190128	00:28:37	3687	1	11	1001	1001	999999999999999	999999999999999	388	1	6	9	12	5	3	40	60	6	20	1	22	15	1	70	50	1	45	2	999	1	30	40	99	99	99	99	2	1	2	2	2	2	6	3	2
298290	201901280189	13912528024	24	20190128	22:38:40	3102	1	18	1001	1001	999999999999999	999999999999999	408	1	6	9	25	1	1	40	80	2	95	1	21	14	1	70	50	1	62	1	999	1	30	40	99	99	99	99	1	1	1	1	1	2	11	3	2
298293	201901280531	13316802170	14	20190128	23:24:16	2502	1	18	1001	1001	999999999999999	999999999999999	335	1	6	9	11	1	1	30	95	3	80	2	18	12	1	70	14	1	42	0	999	1	30	40	99	99	99	99	1	1	2	2	2	1	7	3	2
298273	201901280625	15517473206	19	20190128	15:20:51	654	1	18	1001	1001	999999999999999	999999999999999	360	1	9	9	99	9	9	999	999	9	999	2	20	13	1	70	50	1	999	99	999	9	99	99	99	99	99	99	9	9	9	9	9	9	999	9	1
298278	201901281371	18760318557	12	20190128	16:22:21	3720	1	18	1001	1001	999999999999999	999999999999999	409	1	5	9	10	1	1	0	90	3	75	1	23	12	1	38	50	1	74	7	999	1	32	40	99	99	99	99	1	1	2	2	2	2	11	2	2
298206	201901281403	13298105025	19	20190128	01:46:00	3462	2	18	1001	1001	999999999999999	999999999999999	389	1	6	9	12	1	1	20	0	2	90	2	20	13	1	70	50	1	70	0	999	2	32	40	99	99	99	99	1	1	2	2	2	2	6	2	7
298202	201901281425	15119726141	14	20190128	00:18:13	2930	1	18	1001	1001	999999999999999	999999999999999	403	1	1	1	10	1	1	0	65	2	75	2	18	12	1	21	50	1	70	1	999	3	30	40	99	99	99	99	1	1	2	1	2	2	10	3	2
298230	201901281526	17611470520	10	20190128	09:44:34	1643	1	18	1001	1001	999999999999999	999999999999999	412	1	1	9	10	1	1	60	80	2	60	1	22	12	1	38	50	1	72	0	999	1	32	40	99	99	99	99	2	1	2	2	1	2	6	3	2
298268	201901281841	18164654545	38	20190128	13:41:44	3548	1	18	1001	1001	999999999999999	999999999999999	360	1	1	9	10	1	1	0	90	1	0	1	26	16	1	39	50	1	58	0	999	1	31	40	99	99	99	99	1	1	2	2	2	2	6	3	2
298233	201901282051	18535168560	31	20190128	09:59:19	3673	2	18	1001	1001	999999999999999	999999999999999	401	1	2	9	26	1	1	20	50	1	0	1	25	16	1	38	50	1	49	0	999	1	31	40	99	99	99	99	1	1	2	2	2	2	5	2	2
298235	201901282578	15148277939	27	20190128	10:01:19	3244	1	16	1001	1001	999999999999999	999999999999999	383	1	5	9	24	1	1	999	90	2	50	1	28	16	1	52	50	1	76	0	999	1	32	40	99	99	99	99	1	2	2	2	2	1	5	3	2
298241	201901282886	17338427613	19	20190128	11:50:46	2400	1	16	1001	1001	999999999999999	999999999999999	383	1	6	7	13	1	1	15	60	2	50	2	24	13	1	52	50	1	83	0	999	1	32	40	99	99	99	99	1	2	2	2	2	2	5	3	2
298276	201901283034	13479663606	25	20190128	16:24:19	616	1	18	1001	1001	999999999999999	999999999999999	335	1	9	9	99	9	9	999	999	9	999	2	21	99	9	99	99	1	999	99	999	9	99	99	99	99	99	99	9	9	9	9	9	9	999	9	4
298251	201901283375	18764262762	30	20190128	12:45:27	714	1	18	1001	1001	999999999999999	999999999999999	360	1	9	9	99	9	9	999	999	9	999	2	21	11	1	21	2	1	999	99	999	9	99	99	99	99	99	99	9	9	9	9	9	9	999	9	4
298274	201901283492	15201632704	10	20190128	15:16:00	2859	1	18	1001	1001	999999999999999	999999999999999	402	1	1	9	10	1	1	90	20	2	50	1	27	16	1	20	5	1	77	0	999	1	32	40	99	99	99	99	1	1	2	2	9	9	5	9	5
298232	201901284339	13580258583	14	20190128	08:39:59	4780	1	18	1001	1001	999999999999999	999999999999999	117	1	1	9	10	1	1	999	90	2	50	1	27	16	2	38	50	1	999	99	999	9	99	99	99	99	99	99	9	9	9	9	9	9	999	9	3
298238	201901284594	17680161854	22	20190128	10:29:47	1790	1	11	1001	1001	999999999999999	999999999999999	117	1	1	9	10	1	1	0	70	1	0	2	20	14	1	70	50	1	999	99	999	9	99	99	99	99	99	99	9	9	9	9	9	9	999	9	4
298236	201901285026	17812547540	10	20190128	09:18:55	4863	1	18	1001	1001	999999999999999	999999999999999	402	1	6	5	11	1	1	0	98	5	90	1	21	9	1	21	2	1	75	3	999	1	32	40	99	99	99	99	1	2	1	2	1	1	12	2	2
298256	201901285292	15089837813	14	20190128	13:06:05	2974	1	18	1001	1001	999999999999999	999999999999999	383	1	6	9	23	1	1	0	100	2	50	2	18	11	1	70	50	1	76	0	999	1	32	40	99	99	99	99	1	1	1	1	1	2	10	3	2
298257	201901285388	15810405878	10	20190128	13:11:44	997	1	18	1001	1001	999999999999999	999999999999999	412	1	6	9	12	5	4	1	999	2	999	1	21	14	1	52	50	1	999	99	999	9	99	99	99	99	99	99	9	9	9	9	9	9	999	9	4
298242	201901285781	18807283286	21	20190128	11:10:14	3037	1	18	1001	1001	999999999999999	999999999999999	117	1	6	9	16	5	1	0	90	6	100	1	18	10	1	70	50	1	76	1	999	1	32	40	99	99	99	99	1	1	2	1	1	1	14	2	2
298219	201901285850	15141568463	26	20190128	08:39:08	2545	1	18	1001	1001	999999999999999	999999999999999	412	1	1	9	10	1	1	20	80	2	70	1	20	13	1	70	50	1	81	0	999	1	32	40	99	99	99	99	2	1	2	2	2	1	7	3	2
298263	201901286241	15865478200	30	20190128	14:35:33	2306	1	18	1001	1001	999999999999999	999999999999999	396	1	2	9	24	1	1	0	100	2	100	2	24	8	1	40	50	1	999	99	999	9	99	99	99	99	99	99	9	9	9	9	9	9	999	9	3
298295	201901287014	18207361126	22	20190128	23:53:09	3525	1	18	1001	1001	999999999999999	999999999999999	409	1	1	9	10	1	1	30	70	1	0	2	28	15	1	38	50	1	52	0	999	2	32	40	99	99	99	99	1	2	2	2	2	2	5	2	2
298259	201901287107	15979021087	25	20190128	13:37:04	2827	1	18	1001	1001	999999999999999	999999999999999	412	1	1	9	10	1	1	0	80	1	0	1	19	14	1	70	50	1	38	0	999	1	30	40	99	99	99	99	1	1	2	2	2	2	5	3	2
298272	201901287209	17863528230	30	20190128	14:55:03	2727	1	18	1001	1001	999999999999999	999999999999999	117	1	1	9	10	1	1	55	75	1	0	2	23	14	1	70	50	1	48	0	999	1	31	40	99	99	99	99	1	2	2	2	2	2	2	2	2
298266	201901287240	15359664303	12	20190128	14:48:10	2719	3	18	1001	1001	999999999999999	999999999999999	412	1	8	9	10	1	1	999	999	2	50	1	18	12	1	70	50	1	56	0	999	1	32	40	99	99	99	99	2	2	2	2	2	2	2	2	2
298216	201901288088	13792457856	30	20190128	08:10:16	1736	4	18	1001	1001	999999999999999	999999999999999	396	1	6	5	11	1	1	20	100	1	0	1	19	9	1	52	50	1	73	0	999	1	32	40	99	99	99	99	1	2	2	2	1	1	5	2	6
298289	201901288231	15850620679	24	20190128	21:38:29	2841	1	18	1001	1001	999999999999999	999999999999999	335	1	1	9	10	1	1	50	90	2	70	2	19	13	1	70	70	1	86	0	999	1	32	40	99	99	99	99	1	1	2	2	2	1	8	3	2
298237	201901288544	18681880217	32	20190128	10:34:37	1540	1	18	1001	1001	999999999999999	999999999999999	412	1	1	9	10	1	1	0	999	2	75	2	27	9	1	38	50	1	999	1	999	9	30	40	99	99	99	99	9	9	9	9	9	9	2	9	5
298249	201901288968	15274871674	22	20190128	12:07:51	2120	1	18	1001	1001	999999999999999	999999999999999	402	1	1	9	10	1	1	100	50	1	0	1	20	14	1	70	3	1	49	0	999	1	32	40	99	99	99	99	1	1	2	2	2	2	4	2	2
298286	201901289072	17757964512	10	20190128	20:45:07	2425	2	18	1001	1001	999999999999999	999999999999999	410	1	5	9	10	1	1	25	100	2	60	2	36	12	3	35	50	1	999	99	999	9	99	99	99	99	99	99	9	9	9	9	9	9	999	9	3
298275	201901289668	13018348720	40	20190128	16:20:52	3290	1	16	1001	1001	999999999999999	999999999999999	408	1	2	9	10	1	1	70	70	1	0	2	37	12	1	38	50	1	58	0	999	1	30	40	99	99	99	99	1	2	2	2	2	2	3	3	2
298209	201901289924	18648887761	15	20190128	04:06:06	3688	1	18	1001	1001	999999999999999	999999999999999	387	1	1	9	10	1	1	999	90	2	999	2	20	15	1	99	50	1	53	0	999	1	32	40	99	99	99	99	1	1	2	2	2	2	6	2	2
298377	201901290177	18627665651	22	20190129	20:54:57	3700	1	18	1001	1001	999999999999999	999999999999999	377	1	1	9	10	1	1	60	75	2	25	2	32	15	1	38	50	1	44	0	999	1	30	40	99	99	99	99	1	1	2	2	2	2	5	2	2
298340	201901292147	82739622	10	20190129	13:13:13	2983	7	18	1003	1001	999999999999999	999999999999999	396	1	1	9	10	1	1	90	5	2	60	1	19	12	1	70	50	1	43	1	999	1	31	40	99	99	99	99	2	1	1	2	2	2	5	2	2
298373	201901292195	17665125724	10	20190129	20:01:57	2819	1	18	1001	1001	999999999999999	999999999999999	412	1	1	9	10	1	1	0	100	2	90	1	24	15	3	44	50	1	76	0	999	1	32	40	99	99	99	99	1	1	2	2	2	1	8	3	2
298303	201901293062	13154578800	20	20190129	03:50:59	3399	1	18	1001	1001	999999999999999	999999999999999	410	1	1	9	10	1	1	50	60	2	85	2	29	9	1	38	50	1	42	1	999	1	30	40	99	99	99	99	2	1	2	2	2	2	6	3	2
298330	201901293719	18846917726	20	20190129	11:10:14	3205	1	18	1001	1001	999999999999999	999999999999999	404	1	7	6	23	5	4	50	90	1	0	1	22	14	1	70	50	1	62	0	999	1	30	40	99	99	99	99	1	2	2	1	1	1	7	2	2
298348	201901294233	17381126556	34	20190129	14:39:16	4037	1	18	1001	1001	999999999999999	999999999999999	396	1	1	9	10	1	1	0	90	6	90	1	40	16	4	40	50	1	71	1	999	1	32	40	99	99	99	99	2	2	2	2	2	2	8	2	2
298350	201901294280	15725818526	30	20190129	15:19:39	1705	2	18	1001	1001	999999999999999	999999999999999	390	1	6	7	11	5	2	40	70	2	65	1	30	12	2	50	50	1	999	999	999	9	30	40	99	99	99	99	9	9	9	9	9	9	2	9	5
298325	201901294627	12028484844	70	20190129	09:17:41	2632	3	18	1001	1001	999999999999999	999999999999999	383	1	5	9	24	1	1	50	85	1	0	1	37	19	3	34	5	1	31	0	999	1	30	40	99	99	99	99	1	1	2	2	2	2	5	3	2
298378	201901294822	18109959246	37	20190129	21:31:38	2196	1	18	1001	1001	999999999999999	999999999999999	117	1	6	9	11	1	1	999	70	2	999	2	18	11	1	70	50	1	999	99	999	9	30	40	99	99	99	99	9	9	9	9	9	9	0	9	5
298382	201901294883	18582991607	34	20190129	22:31:58	2324	1	18	1001	1001	999999999999999	999999999999999	117	1	6	9	11	1	1	0	100	5	999	2	21	15	1	52	50	1	999	99	999	9	99	99	99	99	99	99	9	9	9	9	9	9	999	9	4
298309	201901295613	15732716361	18	20190129	06:47:18	994	4	18	1001	1001	999999999999999	999999999999999	335	1	1	1	10	1	1	999	999	9	999	2	21	12	1	52	50	1	999	99	999	9	99	99	99	99	99	99	9	9	9	9	9	9	999	9	4
298311	201901295804	17623778848	21	20190129	07:17:32	688	2	99	1001	1001	999999999999999	999999999999999	409	1	9	9	99	9	9	999	999	9	999	1	28	99	1	99	99	1	999	99	999	9	99	99	99	99	99	99	9	9	9	9	9	9	999	9	4
298352	201901296292	18817562864	33	20190129	15:32:17	3028	1	18	1001	1001	999999999999999	999999999999999	404	1	6	5	25	1	1	55	85	2	80	1	29	18	2	39	8	1	62	0	999	1	32	40	99	99	99	99	2	2	2	2	2	1	4	2	2
298366	201901296476	13560399991	14	20190129	18:11:58	2975	1	18	1001	1001	999999999999999	999999999999999	412	1	1	9	10	1	1	0	100	2	95	1	28	15	2	52	50	1	67	0	999	1	32	40	99	99	99	99	1	1	2	2	2	2	7	3	2
298353	201901297014	18652197054	24	20190129	15:29:04	3401	1	18	1001	1001	999999999999999	999999999999999	383	1	1	9	10	1	1	0	100	6	100	1	26	15	1	44	50	1	81	4	999	1	32	40	99	99	99	99	1	1	2	2	1	1	13	3	2
298343	201901297199	18743145250	23	20190129	13:20:06	2869	1	18	1001	1001	999999999999999	999999999999999	402	1	1	9	10	1	1	40	80	2	60	2	19	12	1	70	70	1	63	0	999	1	30	40	99	99	99	99	1	1	2	1	2	1	9	2	2
298371	201901297503	17560666928	30	20190129	18:35:32	3222	1	18	1001	1001	999999999999999	999999999999999	117	1	1	9	10	1	1	999	100	7	50	1	19	10	7	52	50	1	33	1	999	1	31	40	99	99	99	99	1	1	2	2	1	2	10	2	2
298322	201901297538	18608664696	21	20190129	09:01:24	2799	2	18	1001	1001	999999999999999	999999999999999	396	1	1	9	10	1	1	10	100	2	80	1	34	12	2	44	50	1	92	0	999	1	32	40	99	99	99	99	1	2	2	2	2	1	6	2	2
298362	201901297995	13170093941	11	20190129	16:10:49	3648	1	18	1001	1001	999999999999999	999999999999999	377	1	6	5	24	4	1	65	70	2	55	1	29	16	1	52	50	1	44	1	999	1	30	40	99	99	99	99	1	1	2	2	2	2	6	2	2
298300	201901298483	18989400738	39	20190129	01:40:51	3666	1	18	1001	1001	999999999999999	999999999999999	409	1	2	9	10	1	1	0	999	1	0	1	25	8	1	38	11	1	36	1	999	1	30	40	99	99	99	99	1	2	2	2	2	1	5	2	2
298337	201901299075	18317251363	19	20190129	11:45:45	1692	2	18	1001	1001	999999999999999	999999999999999	383	1	1	9	10	1	1	20	100	2	95	2	25	7	1	44	50	1	95	0	999	1	32	40	99	99	99	99	1	2	1	2	1	2	7	3	2
298387	201901299082	18192219092	32	20190129	23:40:51	1338	2	18	1001	1001	999999999999999	999999999999999	117	1	5	9	24	1	1	999	100	1	0	2	25	16	1	40	50	1	999	99	999	9	99	99	99	99	99	99	9	9	9	9	9	9	999	9	4
298389	201901299228	17610520761	10	20190129	19:35:44	2912	1	18	1001	1001	999999999999999	999999999999999	377	1	1	9	10	1	1	70	50	1	0	1	19	12	1	70	50	1	43	0	999	1	30	40	99	99	99	99	2	1	2	2	2	2	4	2	2
298327	201901299365	15298665330	24	20190129	08:54:34	4814	1	18	1001	1001	999999999999999	999999999999999	402	1	1	9	10	1	1	10	75	2	0	2	22	12	1	70	1	1	999	99	999	9	99	99	99	99	99	99	9	9	9	9	9	9	999	9	3
298306	201901299535	15655556188	11	20190129	05:53:16	3500	1	18	1001	1001	999999999999999	999999999999999	408	1	6	9	11	1	1	95	98	2	50	1	20	12	1	70	50	1	88	4	999	1	32	40	99	99	99	99	1	2	2	2	1	1	7	3	2
298345	201901299684	18537333839	33	20190129	13:56:59	3020	1	88	1001	1001	999999999999999	999999999999999	383	1	5	9	24	1	1	25	70	1	0	2	22	16	1	38	60	1	78	1	999	1	32	40	99	99	99	99	1	1	2	1	1	2	9	3	2
298376	201901299891	15058890694	39	20190129	21:04:53	3332	1	18	1001	1001	999999999999999	999999999999999	412	1	1	9	10	1	1	0	65	2	999	2	26	16	1	38	3	1	64	0	999	1	32	40	99	99	99	99	1	2	2	2	2	2	5	3	2
298441	201901300059	15735161021	31	20190130	16:19:24	2968	1	18	1001	1001	999999999999999	999999999999999	396	1	1	9	10	1	1	999	999	1	0	1	29	20	1	70	5	1	17	0	999	1	30	40	99	99	99	99	2	2	1	2	2	2	1	2	2
298470	201901300157	13829901372	14	20190130	23:10:16	3743	3	18	1001	1001	999999999999999	999999999999999	386	1	2	9	24	1	1	25	90	2	60	2	37	12	1	38	17	1	50	0	999	1	30	40	99	99	99	99	1	1	1	2	1	2	9	2	2
298418	201901300592	18746016571	20	20190130	09:19:12	1862	2	18	1001	1001	999999999999999	999999999999999	411	1	6	9	11	1	2	0	90	3	90	2	19	13	1	70	50	1	83	4	999	4	32	40	99	99	99	99	1	2	2	1	2	1	8	3	6
298406	201901300801	17368712347	24	20190130	06:45:30	3480	1	18	1001	1001	999999999999999	999999999999999	377	1	1	9	10	1	1	1	98	2	90	1	25	15	1	38	4	1	92	2	999	1	32	40	99	99	99	99	1	1	2	2	2	1	9	3	2
298400	201901300842	18709714932	29	20190130	04:43:43	5486	1	18	1001	1001	999999999999999	999999999999999	377	1	6	5	11	1	1	999	999	6	999	2	28	12	1	52	1	1	67	1	999	1	32	40	99	99	99	99	2	2	2	2	2	2	6	2	2
298432	201901300936	17356442885	11	20190130	13:52:01	2443	4	18	1001	1001	999999999999999	999999999999999	385	1	6	9	12	5	3	15	100	2	80	2	24	12	1	52	50	1	999	99	999	9	99	99	99	99	99	99	9	9	9	9	9	9	999	9	3
298423	201901301108	17324331099	14	20190130	10:36:05	2043	1	18	1001	1001	999999999999999	999999999999999	385	1	1	9	10	1	1	50	80	1	0	2	19	12	1	70	1	1	999	99	999	9	99	99	99	99	99	99	9	9	9	9	9	9	999	9	3
298438	201901301314	17376558366	39	20190130	16:07:57	1791	1	18	1001	1001	999999999999999	999999999999999	383	1	7	9	11	1	1	0	85	2	100	1	21	15	1	70	50	1	999	99	999	9	99	99	99	99	99	99	9	9	9	9	9	9	999	9	3
298466	201901301636	13825777628	14	20190130	21:45:21	3816	1	18	1001	1001	999999999999999	999999999999999	402	1	1	9	10	1	1	60	90	2	65	2	34	12	2	44	50	1	54	2	999	1	31	40	99	99	99	99	1	1	1	2	2	1	9	2	2
298429	201901301873	17633865098	33	20190130	12:52:08	2460	1	18	1001	1001	999999999999999	999999999999999	385	1	6	9	11	1	1	10	999	2	90	2	22	14	1	70	50	1	999	99	999	9	99	99	99	99	99	99	9	9	9	9	9	9	999	9	3
298395	201901302195	13661649664	33	20190130	02:57:07	2867	1	18	1001	1001	999999999999999	999999999999999	117	1	6	9	11	1	1	0	100	2	999	1	32	16	8	52	6	1	999	99	999	9	99	99	99	99	99	99	9	9	9	9	9	9	999	9	3
298416	201901302259	18339339641	19	20190130	09:27:39	2999	1	18	1001	1001	999999999999999	999999999999999	385	1	1	9	10	1	1	60	38	1	0	1	21	7	1	52	50	1	28	0	999	1	31	40	99	99	99	99	2	2	2	2	2	2	0	2	2
298456	201901302656	18920788758	35	20190130	19:39:16	3391	1	18	1001	1001	999999999999999	999999999999999	402	1	1	9	10	1	1	60	100	2	90	1	38	12	2	52	50	1	85	0	999	1	32	40	99	99	99	99	1	1	1	2	2	2	7	2	2
298407	201901303651	18720209533	25	20190130	03:10:44	3468	1	18	1001	1001	999999999999999	999999999999999	377	1	6	7	13	1	1	75	60	2	20	2	23	9	1	21	50	1	38	0	999	1	30	40	99	99	99	99	1	2	2	1	2	2	4	2	2
298408	201901303665	13314002252	26	20190130	07:01:40	2658	1	18	1001	1001	999999999999999	999999999999999	117	1	6	9	11	1	1	0	100	3	999	1	28	12	1	21	50	1	999	99	999	9	99	99	99	99	99	99	9	9	9	9	9	9	999	9	4
298462	201901304642	18845907042	20	20190130	21:15:06	5135	1	18	1001	1001	999999999999999	999999999999999	383	1	6	9	11	5	2	20	95	7	85	2	20	13	1	70	50	1	90	2	999	4	32	40	99	99	99	99	1	1	2	1	2	1	14	3	2
298465	201901304938	15202697799	28	20190130	21:21:25	2374	1	18	1001	1001	999999999999999	999999999999999	386	1	6	9	11	1	1	1	90	3	60	1	33	9	1	52	50	1	71	3	999	4	30	40	99	99	99	99	1	1	2	2	2	1	10	2	2
298424	201901305259	18181870124	26	20190130	11:25:00	2920	1	18	1001	1001	999999999999999	999999999999999	406	1	6	6	11	1	1	5	99	2	100	1	28	15	1	39	8	1	88	0	999	1	32	40	99	99	99	99	1	1	2	2	2	2	7	2	2
298439	201901305637	15280617255	12	20190130	16:08:04	3591	1	18	1001	1001	999999999999999	999999999999999	386	1	6	9	11	5	6	25	85	2	999	1	29	15	1	32	50	1	90	0	999	1	32	40	99	99	99	99	1	2	1	2	2	1	7	2	2
298452	201901306441	15842381342	26	20190130	18:54:43	3000	3	18	1001	1001	999999999999999	999999999999999	396	1	1	9	10	1	1	999	999	2	999	2	23	9	1	52	50	1	57	1	999	1	32	40	99	99	99	99	2	2	1	2	2	2	4	2	2
298426	201901306768	13933145591	18	20190130	11:55:49	2408	1	18	1001	1001	999999999999999	999999999999999	385	1	6	9	25	1	1	60	25	1	0	1	38	16	2	39	50	1	999	99	999	9	99	99	99	99	99	99	9	9	9	9	9	9	999	9	3
298391	201901306802	15895473790	24	20190130	01:33:22	3350	1	18	1001	1001	999999999999999	999999999999999	316	1	1	9	10	1	1	65	80	1	0	2	18	12	1	70	50	1	82	0	999	1	32	40	99	99	99	99	1	1	2	2	2	2	6	2	2
298454	201901307371	13753049693	31	20190130	19:06:26	1274	1	18	1001	1001	999999999999999	999999999999999	402	1	1	9	10	1	1	50	85	1	0	2	30	9	2	44	50	1	999	99	999	9	99	99	99	99	99	99	9	9	9	9	9	9	999	9	4
298422	201901308855	13544062265	14	20190130	10:24:58	1228	1	18	1001	1001	999999999999999	999999999999999	404	1	1	9	10	1	1	50	95	2	90	1	21	15	1	35	50	1	999	99	999	9	30	40	99	99	99	99	9	9	9	9	9	9	0	9	5
298437	201901309341	13113675108	14	20190130	15:01:52	726	1	18	1001	1001	999999999999999	999999999999999	411	1	9	9	99	9	9	10	80	2	70	1	18	11	1	70	50	1	999	99	999	9	99	99	99	99	99	99	9	9	9	9	9	9	999	9	4
298468	201901309401	13568884041	34	20190130	22:47:06	3278	1	18	1001	1001	999999999999999	999999999999999	396	1	5	9	26	1	1	20	99	2	80	1	22	16	1	40	5	1	85	1	999	2	32	40	99	99	99	99	1	1	1	2	1	1	11	2	2
298428	201901309679	13910241494	10	20190130	12:33:49	3458	1	18	1001	1001	999999999999999	999999999999999	404	1	5	9	26	1	1	60	60	1	0	1	20	11	1	70	50	1	68	0	999	1	32	40	99	99	99	99	2	2	2	2	2	1	3	2	2
298532	201901310128	15013602643	14	20190131	14:07:20	3247	1	11	1001	1001	999999999999999	999999999999999	391	1	1	9	10	1	1	15	999	2	80	2	18	12	1	70	50	1	47	3	999	1	30	40	99	99	99	99	1	1	2	2	1	1	8	3	2
298558	201901310936	18096530226	11	20190131	21:43:39	2253	14	18	1001	1001	999999999999999	999999999999999	315	1	6	5	16	1	1	60	70	2	10	2	30	15	2	38	50	1	42	0	999	1	31	40	99	99	99	99	2	2	2	1	2	2	3	3	2
298506	201901310946	17602231912	35	20190131	10:08:08	3107	1	18	1001	1001	999999999999999	999999999999999	406	1	6	6	11	5	1	50	60	1	0	2	25	12	1	20	3	1	60	0	999	1	32	40	99	99	99	99	1	2	2	2	2	1	5	2	2
298518	201901311253	13540086470	34	20190131	12:08:38	2624	1	18	1001	1001	999999999999999	999999999999999	388	1	1	9	10	1	1	45	999	2	55	2	29	16	2	38	50	1	999	99	999	9	99	99	99	99	99	99	9	9	9	9	9	9	999	9	3
298495	201901312159	18692095862	22	20190131	08:33:11	3312	1	18	1001	1001	999999999999999	999999999999999	391	1	5	9	26	1	1	100	100	2	90	1	20	15	1	70	50	1	28	0	999	1	30	40	99	99	99	99	1	1	2	2	1	1	7	3	2
298471	201901312360	13989127653	14	20190131	00:05:28	3347	1	18	1001	1001	999999999999999	999999999999999	396	1	1	9	10	1	1	50	90	6	0	2	34	5	1	38	60	1	75	1	999	1	32	40	99	99	99	99	1	2	2	2	2	2	5	2	2
298490	201901312487	15281385391	34	20190131	08:40:06	1612	1	18	1001	1001	999999999999999	999999999999999	406	1	6	6	11	1	1	30	60	2	80	1	26	12	2	52	20	1	999	1	999	9	30	40	99	99	99	99	9	9	9	9	9	9	5	9	5
298492	201901312725	17755547201	10	20190131	08:33:01	2335	1	18	1001	1001	999999999999999	999999999999999	336	1	1	9	10	1	1	0	90	2	75	1	20	16	1	70	50	1	60	0	999	1	30	40	99	99	99	99	2	1	2	2	2	1	7	3	2
298552	201901313332	18606516595	39	20190131	19:44:06	2205	1	11	1001	1001	999999999999999	999999999999999	315	1	1	9	10	1	1	0	100	6	999	1	28	12	2	38	20	1	97	3	999	1	32	40	99	99	99	99	1	1	2	2	2	2	11	3	2
298480	201901313499	13528288280	14	20190131	04:48:01	2775	1	18	1001	1001	999999999999999	999999999999999	396	1	1	9	10	1	1	45	90	2	65	2	21	12	1	38	5	1	52	0	999	1	30	40	99	99	99	99	2	1	2	2	2	2	6	2	2
298516	201901313918	15056181326	11	20190131	10:46:12	3227	1	14	1001	1001	999999999999999	999999999999999	411	1	2	9	24	1	1	50	50	1	0	1	50	9	2	43	50	1	18	0	999	1	30	40	99	99	99	99	1	2	2	2	2	2	3	2	2
298539	201901314180	15876120764	14	20190131	16:29:06	1738	5	18	1001	1001	999999999999999	999999999999999	404	1	7	6	13	5	4	50	90	1	0	2	47	14	4	21	5	1	54	0	999	1	30	40	99	99	99	99	2	2	2	2	2	1	4	2	2
298554	201901314460	15507813805	15	20190131	20:25:34	2061	1	18	1001	1001	999999999999999	999999999999999	404	1	1	9	10	1	1	50	999	1	0	1	22	14	1	70	50	1	69	0	999	1	30	40	99	99	99	99	2	2	1	1	2	1	5	2	2
298473	201901315311	18365946931	30	20190131	00:42:36	944	1	18	1001	1001	999999999999999	999999999999999	386	1	1	9	10	1	1	10	90	1	0	1	30	20	2	39	2	1	999	99	999	9	30	40	99	99	99	99	9	9	9	9	9	9	0	9	5
298546	201901316110	13907705518	15	20190131	17:58:12	2480	1	18	1001	1001	999999999999999	999999999999999	315	1	1	9	10	1	1	10	98	2	80	2	32	15	2	44	50	1	49	0	999	1	32	40	99	99	99	99	1	1	2	2	2	2	6	3	2
298505	201901316150	18384184143	28	20190131	10:08:16	3249	1	18	1001	1001	999999999999999	999999999999999	336	1	1	9	10	1	1	0	90	2	50	1	22	16	1	70	50	1	80	0	999	1	32	40	99	99	99	99	1	1	2	2	2	1	8	3	2
298526	201901316416	15106175237	24	20190131	12:48:36	2341	1	18	1001	1001	999999999999999	999999999999999	403	1	6	9	11	1	1	55	90	2	80	1	21	12	1	35	3	1	53	3	999	1	32	40	99	99	99	99	1	2	2	1	9	9	5	9	5
298497	201901316439	18510067859	18	20190131	08:39:27	2635	1	18	1001	1001	999999999999999	999999999999999	411	1	1	9	10	1	1	30	90	2	999	1	31	13	2	33	50	1	61	0	999	1	32	40	99	99	99	99	1	1	2	2	2	1	8	3	2
298521	201901316622	13933685301	18	20190131	12:33:39	2684	3	18	1001	1001	999999999999999	999999999999999	406	1	1	1	10	1	1	999	50	2	999	1	19	11	1	70	19	1	54	0	999	1	31	40	99	99	99	99	2	2	2	2	2	2	3	2	2
298503	201901316993	15248307911	27	20190131	10:14:46	3636	1	18	1001	1001	999999999999999	999999999999999	389	1	6	9	11	5	2	20	80	2	80	1	24	16	1	38	50	1	88	0	999	1	32	40	99	99	99	99	1	2	2	1	2	2	6	2	2
298538	201901317492	18237200592	19	20190131	16:22:03	3522	2	18	1001	1001	999999999999999	999999999999999	385	1	6	7	11	5	2	0	100	1	0	2	33	12	1	52	50	1	77	0	999	5	32	40	99	99	99	99	1	2	2	2	2	2	6	2	2
298477	201901317541	15154223222	30	20190131	01:54:01	3444	1	18	1001	1001	999999999999999	999999999999999	386	1	1	9	10	1	1	40	50	2	50	2	21	15	1	88	50	1	83	3	999	1	32	40	99	99	99	99	1	2	2	1	2	2	7	2	2
298484	201901317955	13916852534	33	20190131	04:47:43	3510	1	18	1001	1001	999999999999999	999999999999999	402	1	6	9	12	1	3	20	100	2	80	1	19	12	1	52	70	1	66	1	999	1	32	40	99	99	99	99	1	1	1	2	2	1	10	2	2
298555	201901318040	19916921267	10	20190131	21:20:44	4926	1	18	1001	1001	999999999999999	999999999999999	404	1	6	9	11	5	2	5	90	5	80	1	19	11	1	70	99	1	999	99	999	9	99	99	99	99	99	99	9	9	9	9	9	9	999	9	4
298537	201901318434	13832772909	18	20190131	14:57:11	3685	2	18	1001	1001	999999999999999	999999999999999	389	1	1	9	10	1	1	50	99	2	60	1	32	15	4	52	50	1	67	0	999	1	32	40	99	99	99	99	1	1	1	1	1	1	11	2	2
298535	201901318557	15600758165	10	20190131	13:02:23	2747	1	18	1001	1001	999999999999999	999999999999999	411	1	6	5	11	1	1	40	85	1	0	1	20	14	1	70	99	1	999	99	999	9	99	99	99	99	99	99	9	9	9	9	9	9	999	9	3
298557	201901318757	75527659109	14	20190131	21:48:29	2831	26	88	1001	1001	18927495323	999999999999999	385	1	6	9	16	1	5	1	95	1	0	1	37	11	2	38	14	1	73	2	999	1	32	40	99	99	99	99	1	1	1	1	1	2	10	2	2
298542	201901319019	18343307272	23	20190131	16:40:57	2558	1	18	1001	1001	999999999999999	999999999999999	390	1	1	1	10	1	1	50	65	2	40	2	25	9	1	35	50	1	999	0	999	9	30	40	99	99	99	99	9	9	9	9	9	9	1	9	5
298494	201901319334	15866048764	30	20190131	09:07:15	752	1	18	1001	1001	999999999999999	999999999999999	403	1	6	9	25	1	1	20	80	2	50	1	26	99	1	99	99	1	999	99	999	9	99	99	99	99	99	99	9	9	9	9	9	9	999	9	4
298562	201902010054	15604297025	26	20190201	00:09:39	3395	1	18	1001	1001	999999999999999	999999999999999	390	1	1	1	10	1	1	50	70	2	30	1	18	13	1	70	50	1	64	0	999	1	30	40	99	99	99	99	1	1	2	2	2	2	7	3	2
298565	201902010310	18079098299	25	20190201	03:16:32	3535	1	18	1001	1001	999999999999999	999999999999999	315	1	6	9	16	1	1	0	100	2	30	1	30	11	1	44	50	1	83	0	999	1	32	40	99	99	99	99	1	2	2	2	2	1	6	3	2
298575	201902011186	18137612885	19	20190201	07:35:32	3371	1	18	1001	1001	999999999999999	999999999999999	404	1	7	6	13	5	4	0	95	2	80	1	18	9	1	52	50	1	81	4	999	1	30	40	99	99	99	99	1	2	2	1	2	1	8	2	2
298618	201902013179	18300661581	19	20190201	17:37:10	5464	1	18	1001	1001	999999999999999	999999999999999	332	1	1	9	10	1	1	10	85	6	90	2	22	10	1	88	50	1	78	1	999	1	32	40	99	99	99	99	1	1	2	2	2	1	12	3	2
298600	201902014412	13770325289	35	20190201	13:14:21	3928	1	18	1001	1001	999999999999999	999999999999999	388	1	6	5	11	5	2	90	70	6	20	1	22	15	1	70	50	1	74	2	999	1	32	40	99	99	99	99	2	1	2	2	2	2	9	3	2
298604	201902014726	18656029408	11	20190201	14:32:27	2281	1	18	1001	1001	999999999999999	999999999999999	403	1	6	9	11	5	2	50	80	2	90	2	40	20	2	39	50	1	74	0	999	1	32	40	99	99	99	99	1	2	2	2	2	1	6	3	2
298606	201902014810	18352880633	25	20190201	14:52:42	2775	1	18	1001	1001	999999999999999	999999999999999	410	1	1	9	10	1	1	35	90	2	10	2	21	13	1	70	50	1	52	0	999	1	30	40	99	99	99	99	2	1	2	2	2	2	6	3	2
298602	201902015048	13803025542	35	20190201	13:16:10	1166	1	99	1001	1001	999999999999999	999999999999999	403	1	1	1	10	1	1	999	70	9	999	1	39	99	1	38	99	1	999	99	999	9	99	99	99	99	99	99	9	9	9	9	9	9	999	9	4
298588	201902015168	18963227595	30	20190201	10:41:55	2593	2	18	1001	1001	999999999999999	999999999999999	410	1	6	9	25	1	1	0	999	2	999	1	33	12	4	21	50	1	999	99	999	9	99	99	99	99	99	99	9	9	9	9	9	9	999	9	3
298629	201902015246	17351973810	13	20190201	22:52:27	3734	1	18	1001	1001	999999999999999	999999999999999	332	1	6	5	14	1	1	55	70	2	85	2	19	13	1	70	50	1	76	1	999	1	32	40	99	99	99	99	1	1	2	1	2	2	8	3	2
298607	201902015525	15998619105	26	20190201	16:17:13	3432	1	18	1001	1001	999999999999999	999999999999999	406	1	5	5	26	1	1	0	95	3	95	1	39	18	2	40	10	1	69	0	999	1	32	40	99	99	99	99	1	1	2	1	2	1	9	2	2
298630	201902015774	13625650327	11	20190201	23:00:03	3430	1	18	1001	1001	999999999999999	999999999999999	391	1	1	9	10	1	1	85	35	2	55	1	25	16	1	38	99	1	21	0	999	1	30	40	99	99	99	99	2	1	2	2	2	2	4	3	2
298619	201902016155	13366121748	10	20190201	19:14:20	1716	6	18	1001	1001	999999999999999	999999999999999	406	1	6	6	13	1	1	0	100	2	50	2	32	9	1	35	1	1	78	0	999	1	32	40	99	99	99	99	1	1	2	1	1	1	10	2	2
298609	201902016279	17792231362	32	20190201	16:07:49	2675	3	18	1001	1001	999999999999999	999999999999999	391	1	1	9	10	1	1	60	60	1	0	1	55	16	2	38	50	1	999	99	999	9	99	99	99	99	99	99	9	9	9	9	9	9	999	9	3
298580	201902016615	13940667722	26	20190201	08:55:18	3459	1	18	1001	1001	999999999999999	999999999999999	336	1	1	9	10	1	1	999	100	2	90	1	24	12	2	38	50	1	87	8	999	1	32	40	99	99	99	99	1	1	2	2	2	2	7	3	2
298579	201902016935	15172418255	21	20190201	08:55:13	2501	1	18	1001	1001	999999999999999	999999999999999	388	1	1	9	10	1	1	10	999	3	50	2	29	15	1	44	3	1	63	0	999	1	31	40	99	99	99	99	2	1	2	2	2	2	5	3	2
298612	201902017112	15949975602	30	20190201	17:33:41	3438	1	18	1001	1001	999999999999999	999999999999999	406	1	3	3	26	1	1	60	70	2	40	2	30	18	1	38	3	1	54	0	999	1	31	40	99	99	99	99	1	1	1	1	2	1	9	2	2
298590	201902017282	13474455603	32	20190201	11:47:50	3533	1	18	1001	1001	999999999999999	999999999999999	336	1	5	9	26	1	1	9	90	2	80	2	29	16	2	38	8	1	81	0	999	1	32	40	99	99	99	99	2	2	2	2	2	2	4	3	2
298587	201902017772	13862157567	24	20190201	09:07:04	2524	1	18	1001	1001	999999999999999	999999999999999	409	1	1	9	10	1	1	50	80	1	0	1	23	12	1	35	3	1	21	0	999	1	30	40	99	99	99	99	1	1	2	2	2	2	5	2	2
298582	201902018007	15318463285	30	20190201	09:22:41	2617	1	18	1001	1001	999999999999999	999999999999999	410	1	1	9	10	1	1	50	75	2	70	2	26	11	1	38	50	1	60	0	999	1	30	40	99	99	99	99	1	1	2	1	2	2	8	3	2
298584	201902018309	13905799744	39	20190201	09:22:33	2558	1	18	1001	1001	999999999999999	999999999999999	403	1	1	1	10	1	1	0	999	2	100	1	42	9	2	44	50	1	83	0	999	1	32	40	99	99	99	99	2	2	2	2	2	1	4	3	2
298610	201902019057	17685693509	10	20190201	16:39:52	1921	3	18	1001	1001	999999999999999	999999999999999	411	1	2	9	24	1	6	0	100	1	0	2	24	9	1	35	50	1	52	1	999	1	30	40	99	99	99	99	1	1	2	2	2	1	7	3	6
298570	201902019982	17793305826	13	20190201	05:56:34	3722	1	18	1001	1001	999999999999999	999999999999999	385	1	5	9	24	1	1	35	90	2	60	1	19	13	1	70	50	1	68	0	999	1	32	40	99	99	99	99	1	1	2	2	2	1	8	2	2
298706	201902020272	17615278850	30	20190202	22:14:26	3021	1	18	1001	1001	999999999999999	999999999999999	403	1	1	1	10	1	1	60	80	1	0	2	27	9	2	21	50	1	56	0	999	1	31	40	99	99	99	99	1	2	2	2	2	2	3	2	2
298670	201902020949	18529496214	14	20190202	12:29:42	3215	1	18	1001	1001	999999999999999	999999999999999	117	1	6	9	23	1	1	50	40	1	0	1	19	7	1	52	50	1	15	6	999	1	30	40	99	99	99	99	2	2	2	2	2	2	2	2	2
298708	201902021754	17796641000	19	20190202	23:11:22	2936	1	18	1001	1001	999999999999999	999999999999999	336	1	1	9	10	1	1	999	100	1	0	1	21	15	1	70	50	1	58	0	999	1	30	40	99	99	99	99	1	1	2	2	2	1	7	2	2
298634	201902021878	13127121040	30	20190202	01:10:57	2224	1	11	1001	1001	999999999999999	999999999999999	406	1	1	1	10	1	1	30	80	2	70	2	19	12	1	70	1	1	90	1	999	1	32	40	99	99	99	99	1	1	1	2	2	1	10	2	2
298657	201902022184	13546602034	31	20190202	08:34:10	2228	1	18	1001	1001	999999999999999	999999999999999	377	1	6	7	11	5	2	70	50	2	50	1	42	16	2	39	50	1	47	0	999	1	31	40	99	99	99	99	2	2	2	2	2	2	2	2	2
298690	201902022539	15285431888	16	20190202	15:05:38	2802	1	18	1001	1001	999999999999999	999999999999999	117	1	6	9	11	1	1	10	100	2	90	1	33	15	3	52	50	1	999	99	999	9	99	99	99	99	99	99	9	9	9	9	9	9	999	9	3
298666	201902022607	18077773338	15	20190202	11:21:43	1201	1	99	1001	1001	999999999999999	999999999999999	117	1	1	9	10	1	1	999	999	2	999	2	29	99	2	44	99	1	999	99	999	9	99	99	99	99	99	99	9	9	9	9	9	9	999	9	4
298688	201902022949	18567770099	19	20190202	15:22:45	2634	1	18	1001	1001	999999999999999	999999999999999	412	1	6	5	11	5	2	55	80	2	80	2	27	9	1	35	50	1	85	1	999	3	32	40	99	99	99	99	1	2	2	2	2	1	7	2	2
298701	201902022992	15901127050	10	20190202	18:51:39	2585	1	18	1001	1001	999999999999999	999999999999999	389	1	1	9	10	1	1	0	100	2	90	2	30	15	4	38	50	1	92	0	999	1	32	40	99	99	99	99	2	2	2	2	2	1	5	2	2
298635	201902023686	17855736999	11	20190202	00:36:10	3759	1	18	1001	1001	999999999999999	999999999999999	332	1	3	9	24	1	1	0	85	2	80	1	20	9	1	38	50	1	76	1	999	1	32	40	99	99	99	99	1	1	2	2	2	1	9	3	2
298695	201902023729	13474851238	27	20190202	17:23:01	3619	1	18	1001	1001	999999999999999	999999999999999	403	1	1	1	10	1	1	0	999	2	80	2	25	16	1	38	50	1	94	1	999	1	32	40	99	99	99	99	2	1	2	2	2	1	7	2	2
298700	201902024005	13705121441	24	20190202	19:38:16	3176	1	18	1001	1001	999999999999999	999999999999999	389	1	1	9	10	1	1	0	0	7	75	2	30	9	4	52	50	1	71	2	999	9	32	40	99	99	99	99	9	9	9	9	9	9	6	9	5
298691	201902024025	9966022169	37	20190202	16:13:20	2536	1	11	1001	1001	999999999999999	999999999999999	389	1	1	9	10	1	1	35	60	1	0	2	18	11	1	70	50	1	999	99	999	9	99	99	99	99	99	99	9	9	9	9	9	9	999	9	3
298667	201902024266	18686943126	20	20190202	11:34:14	3358	1	18	1001	1001	999999999999999	999999999999999	412	1	1	9	10	1	1	100	0	1	0	1	19	13	1	70	50	1	50	2	999	1	32	40	99	99	99	99	1	1	2	2	1	1	7	2	2
298668	201902025395	67215905	10	20190202	12:07:51	2888	1	18	1001	1001	999999999999999	999999999999999	401	1	1	9	10	1	1	30	100	1	0	1	27	15	1	40	50	1	999	99	999	9	99	99	99	99	99	99	9	9	9	9	9	9	999	9	3
298674	201902025689	18221169019	33	20190202	13:13:44	2729	3	18	1001	1001	999999999999999	999999999999999	412	1	2	9	10	1	1	30	90	2	85	1	25	15	7	52	2	1	100	0	999	1	32	40	99	99	99	99	2	1	1	2	1	2	8	2	2
298707	201902026044	15033111953	18	20190202	23:09:47	1186	1	18	1001	1001	999999999999999	999999999999999	388	1	1	9	10	1	1	20	70	1	0	1	23	15	1	52	50	1	999	99	999	9	99	99	99	99	99	99	9	9	9	9	9	9	999	9	3
298672	201902026274	15959085109	12	20190202	13:04:26	3642	1	11	1001	1001	999999999999999	999999999999999	409	1	1	9	10	1	6	0	50	2	75	2	23	15	1	38	50	1	63	0	999	2	30	40	99	99	99	99	1	1	2	2	2	1	8	2	2
298676	201902026586	18234083923	31	20190202	13:44:23	1981	1	18	1001	1001	999999999999999	999999999999999	401	1	1	9	10	1	1	50	98	2	50	2	26	18	1	70	50	1	999	0	999	9	30	40	99	99	99	99	9	9	9	9	9	9	1	9	5
298644	201902026699	18191210333	32	20190202	05:06:57	5154	1	18	1001	1001	999999999999999	999999999999999	411	1	6	5	24	5	6	0	100	5	90	1	27	15	2	38	50	1	76	0	999	1	30	40	99	99	99	99	2	2	2	2	2	1	5	3	2
298632	201902027430	13141001978	10	20190202	00:31:03	1148	1	18	1001	1001	999999999999999	999999999999999	406	1	5	5	10	1	1	80	80	2	50	2	18	12	1	70	18	1	999	0	999	9	30	40	99	99	99	99	9	9	9	9	9	9	1	9	5
298647	201902027629	18080171206	34	20190202	06:37:51	1914	1	18	1001	1001	999999999999999	999999999999999	332	1	1	9	10	1	1	35	85	2	55	2	43	12	4	42	50	1	999	0	999	9	30	40	99	99	99	99	9	9	9	9	9	9	1	9	5
298697	201902028460	13683781614	19	20190202	17:43:49	5452	1	18	1001	1001	999999999999999	999999999999999	388	1	1	9	10	1	1	999	100	2	45	1	21	14	1	70	50	1	64	0	999	1	30	40	99	99	99	99	1	1	2	2	2	2	6	3	2
298665	201902029059	18604741571	27	20190202	10:03:21	3033	1	14	1001	1001	999999999999999	999999999999999	117	1	1	9	10	1	1	55	75	2	999	1	32	15	2	39	50	1	81	0	999	1	32	40	99	99	99	99	1	2	2	2	2	2	4	3	2
298669	201902029405	17687912328	25	20190202	11:20:21	3634	1	18	1001	1001	999999999999999	999999999999999	377	1	1	9	10	1	1	0	100	2	65	2	20	12	1	52	50	1	68	2	999	1	30	40	99	99	99	99	2	1	2	2	2	2	7	2	2
298652	201902029830	19979405122	25	20190202	08:48:22	2817	1	88	1001	1001	999999999999999	999999999999999	412	1	5	9	10	1	1	60	55	1	0	2	20	14	1	70	50	1	30	0	999	1	30	40	99	99	99	99	2	1	2	2	2	1	4	2	2
298703	201902029879	13381022724	21	20190202	20:35:36	1167	1	18	1001	1001	999999999999999	999999999999999	403	1	5	1	26	1	1	60	30	2	10	1	19	13	1	70	50	1	999	99	999	9	99	99	99	99	99	99	9	9	9	9	9	9	999	9	3
298714	201902031544	13031241980	37	20190203	04:29:48	4877	1	18	1001	1001	999999999999999	999999999999999	388	1	5	9	24	1	1	9	50	2	87	2	23	9	1	52	10	1	87	0	999	1	32	40	99	99	99	99	1	1	2	2	2	2	7	3	2
298745	201902032034	18032160213	18	20190203	11:42:01	1223	1	18	1001	1001	999999999999999	999999999999999	383	1	1	9	10	1	1	0	100	2	50	2	34	16	1	38	50	1	999	0	999	9	30	40	99	99	99	99	9	9	9	9	9	9	1	9	5
298724	201902032101	15718526186	16	20190203	08:15:43	3644	1	18	1001	1001	999999999999999	999999999999999	383	1	1	9	10	1	1	0	80	2	999	2	31	12	4	33	50	1	78	1	999	1	32	40	99	99	99	99	1	1	1	2	2	1	10	3	2
298772	201902032302	18672213152	21	20190203	19:38:10	1919	2	18	1001	1001	999999999999999	999999999999999	409	1	1	9	10	1	1	60	35	1	0	1	22	16	1	38	50	1	999	99	999	9	99	99	99	99	99	99	9	9	9	9	9	9	999	9	3
298765	201902032397	13998398195	26	20190203	16:16:26	2550	2	18	1001	1001	23308119	23736810	401	1	6	9	11	1	2	10	80	1	0	1	21	12	1	35	50	1	999	99	999	9	99	99	99	99	99	99	9	9	9	9	9	9	999	9	3
298730	201902032479	15944853705	23	20190203	09:46:44	3290	1	12	1001	1001	999999999999999	999999999999999	396	1	1	9	10	1	1	50	70	1	0	1	20	12	1	70	50	1	33	0	999	1	30	40	99	99	99	99	1	2	2	2	2	2	3	2	2
298760	201902032812	18580503106	40	20190203	14:13:56	2945	1	18	1001	1001	999999999999999	999999999999999	410	1	1	9	10	1	1	999	75	2	35	2	19	12	1	38	50	1	88	0	999	1	32	40	99	99	99	99	1	2	2	1	2	1	6	3	2
298717	201902032942	18186376560	21	20190203	08:12:08	3378	1	18	1001	1001	999999999999999	999999999999999	396	1	1	9	10	1	1	30	20	1	0	1	18	12	1	70	50	1	54	0	999	1	30	40	99	99	99	99	1	2	1	2	2	2	4	2	2
298732	201902033262	15081738887	18	20190203	08:55:41	3646	1	18	1001	1001	999999999999999	999999999999999	315	1	6	9	11	1	1	20	75	2	60	2	30	16	2	39	50	1	88	0	999	1	32	40	99	99	99	99	2	2	2	2	2	2	4	3	2
298758	201902033915	18131303708	10	20190203	13:39:50	3480	23	18	1001	1001	999999999999999	999999999999999	360	1	6	5	23	1	1	70	90	2	50	1	36	16	1	38	50	1	34	0	999	1	30	40	99	99	99	99	2	1	2	2	1	2	4	3	2
298738	201902034216	17896085918	18	20190203	10:07:50	1679	1	18	1001	1001	999999999999999	999999999999999	360	1	6	9	11	1	1	999	999	2	999	1	22	9	1	52	50	1	999	99	999	9	99	99	99	99	99	99	9	9	9	9	9	9	999	9	4
298762	201902034407	15905788927	39	20190203	14:10:20	2885	1	13	1001	1001	999999999999999	999999999999999	412	1	1	9	10	1	1	20	100	2	50	1	25	15	1	38	50	1	72	0	999	1	31	40	99	99	99	99	1	1	2	2	2	1	8	3	2
298744	201902034411	13165121055	30	20190203	11:37:09	3169	1	18	1001	1001	999999999999999	999999999999999	412	1	6	9	24	1	1	0	80	2	90	1	24	9	1	38	50	1	999	99	999	9	30	40	99	99	99	99	9	9	9	9	9	9	0	9	5
298713	201902034596	13403014464	21	20190203	04:15:01	692	1	18	1001	1001	999999999999999	999999999999999	388	1	1	9	10	1	1	999	999	2	999	1	30	15	1	44	50	1	999	99	999	9	99	99	99	99	99	99	9	9	9	9	9	9	999	9	4
298711	201902034802	13604320836	23	20190203	01:02:05	2392	1	16	1001	1001	999999999999999	999999999999999	403	1	6	5	14	1	1	50	90	1	0	2	35	12	2	52	50	1	999	99	999	9	99	99	99	99	99	99	9	9	9	9	9	9	999	9	3
298728	201902034946	13268016609	14	20190203	09:19:56	2245	2	18	1001	1001	999999999999999	999999999999999	402	1	1	9	10	1	1	35	35	2	30	2	28	15	1	21	20	1	999	99	999	9	99	99	99	99	99	99	9	9	9	9	9	9	999	9	3
298766	201902035007	15943022038	23	20190203	16:27:58	937	2	18	1001	1001	999999999999999	999999999999999	335	1	6	7	13	5	4	999	98	2	60	1	35	15	1	52	15	1	999	99	999	9	99	99	99	99	99	99	9	9	9	9	9	9	999	9	4
298715	201902036114	18295596288	28	20190203	02:50:01	5630	1	18	1001	1001	999999999999999	999999999999999	389	1	1	9	10	1	1	60	100	2	90	1	27	15	1	52	50	1	65	0	999	1	32	40	99	99	99	99	1	1	2	2	2	2	6	2	2
298749	201902036633	18604405587	23	20190203	12:18:22	2420	4	18	1001	1001	999999999999999	999999999999999	383	1	1	9	10	1	1	0	100	2	80	1	32	12	4	38	50	1	83	0	999	1	32	40	99	99	99	99	2	1	2	2	2	1	7	3	2
298716	201902036947	13559915831	12	20190203	05:59:34	2281	3	18	1001	1001	999999999999999	999999999999999	403	1	6	9	11	1	1	0	100	2	60	2	34	9	1	52	60	1	999	99	999	9	99	99	99	99	99	99	9	9	9	9	9	9	999	9	3
298753	201902037318	15800593375	39	20190203	12:47:25	3327	1	18	1001	1001	999999999999999	999999999999999	412	1	1	9	10	1	1	50	40	2	999	1	19	9	1	35	2	1	85	0	999	1	32	40	99	99	99	99	1	1	2	1	1	2	8	2	2
298735	201902037328	18507917393	25	20190203	09:49:15	3146	1	18	1001	1001	999999999999999	999999999999999	410	1	1	9	10	1	1	10	95	2	85	1	40	16	3	38	10	1	999	99	999	9	99	99	99	99	99	99	9	9	9	9	9	9	999	9	3
298755	201902037585	17779203281	25	20190203	13:28:19	3341	1	18	1001	1001	999999999999999	999999999999999	383	1	1	9	10	1	1	25	100	2	80	2	19	11	1	70	50	1	65	0	999	1	31	40	99	99	99	99	2	1	2	1	2	1	8	3	2
298767	201902037792	18080188704	34	20190203	18:07:29	3192	1	18	1001	1001	999999999999999	999999999999999	401	1	1	9	10	1	1	5	99	2	90	2	23	12	1	38	50	1	80	0	999	1	32	40	99	99	99	99	1	1	2	1	2	1	9	2	2
298748	201902038819	18146934143	37	20190203	12:14:21	2086	1	18	1001	1001	999999999999999	999999999999999	396	1	6	7	13	1	1	20	70	1	0	1	25	15	1	52	10	1	999	99	999	9	99	99	99	99	99	99	9	9	9	9	9	9	999	9	4
298726	201902038929	13565771709	37	20190203	09:07:42	1075	1	99	1001	1001	999999999999999	999999999999999	410	1	1	9	10	1	6	999	100	2	100	2	39	99	9	99	99	1	999	99	999	9	99	99	99	99	99	99	9	9	9	9	9	9	999	9	4
298710	201902038979	15055177585	11	20190203	01:14:25	4689	1	18	1001	1001	999999999999999	999999999999999	336	1	1	9	10	1	1	0	80	2	85	1	22	15	1	38	50	1	72	0	999	1	32	40	99	99	99	99	1	2	1	2	2	2	6	3	2
298736	201902039172	18742548840	26	20190203	10:25:54	3280	1	18	1001	1001	999999999999999	999999999999999	402	1	1	9	10	1	1	1	100	2	45	1	20	14	1	70	2	1	100	0	999	1	32	40	99	99	99	99	1	1	1	2	1	1	10	2	2
298759	201902039238	13330744371	34	20190203	14:19:52	3350	1	18	1001	1001	999999999999999	999999999999999	396	1	1	9	10	1	1	999	999	2	80	1	19	14	1	70	50	1	60	1	999	1	32	40	99	99	99	99	1	2	2	2	2	1	5	2	2
298746	201902039305	18750434966	21	20190203	11:33:48	3025	1	18	1001	1001	999999999999999	999999999999999	360	1	1	9	10	1	1	10	80	2	999	2	24	9	2	35	50	1	59	0	999	5	30	40	99	99	99	99	1	1	1	2	1	2	9	3	2
298781	201902040643	13525020507	19	20190204	08:18:42	2125	2	18	1001	1001	999999999999999	999999999999999	383	1	6	5	11	5	2	50	90	2	80	1	26	9	2	52	50	1	73	3	999	1	32	40	99	99	99	99	1	1	2	2	2	1	8	3	2
298793	201902040732	17662097728	30	20190204	10:22:57	2660	1	18	1001	1001	999999999999999	999999999999999	383	1	1	9	10	1	1	50	999	2	50	1	22	15	1	32	50	1	71	0	999	1	32	40	99	99	99	99	1	1	2	1	1	1	12	3	2
298787	201902040916	18967395518	39	20190204	09:45:44	3408	3	18	1001	1001	999999999999999	999999999999999	396	1	5	9	24	1	1	45	65	1	0	1	18	11	1	70	50	1	74	1	999	1	32	40	99	99	99	99	1	2	2	2	2	1	6	2	2
298846	201902041020	15903835198	19	20190204	19:44:58	1539	1	18	1001	1001	999999999999999	999999999999999	117	1	1	9	10	1	1	999	999	5	999	2	19	6	1	44	50	1	999	99	999	9	99	99	99	99	99	99	9	9	9	9	9	9	999	9	4
298821	201902041447	18211932556	19	20190204	13:23:06	4770	1	18	1001	1001	999999999999999	999999999999999	402	1	1	9	10	1	1	35	95	7	999	1	20	14	1	70	50	1	39	0	999	1	30	40	99	99	99	99	1	1	1	2	1	1	12	2	2
298811	201902042992	13763807898	12	20190204	13:07:59	2557	2	18	1001	1001	999999999999999	999999999999999	385	1	1	9	10	1	1	0	30	2	50	2	40	12	2	44	50	1	999	99	999	9	99	99	99	99	99	99	9	9	9	9	9	9	999	9	3
298837	201902043572	821067811404	70	20190204	18:00:42	3447	1	18	1001	1001	999999999999999	999999999999999	117	1	6	9	11	5	2	0	100	2	80	1	18	10	1	88	2	1	87	2	999	1	32	40	99	99	99	99	2	2	2	2	1	1	7	2	2
298825	201902043593	13909776795	29	20190204	15:40:31	1945	2	18	1001	1001	999999999999999	999999999999999	383	1	6	5	11	1	1	55	50	6	30	2	18	12	1	70	5	1	85	5	999	1	32	40	99	99	99	99	1	1	2	2	1	1	12	3	2
298849	201902043890	15638865950	19	20190204	21:19:50	2856	1	18	1001	1001	999999999999999	999999999999999	316	1	6	5	16	5	4	60	80	2	50	1	20	12	1	52	50	1	71	0	999	2	32	40	99	99	99	99	1	2	2	2	2	2	4	3	2
298831	201902044249	13911250804	10	20190204	16:15:51	2029	2	18	1001	1001	999999999999999	999999999999999	117	1	6	7	11	1	1	999	100	2	999	1	40	16	7	38	17	1	999	99	999	9	99	99	99	99	99	99	9	9	9	9	9	9	999	9	4
298776	201902044345	13918660748	33	20190204	00:08:45	2496	1	18	1001	1001	999999999999999	999999999999999	409	1	1	9	10	1	1	35	70	1	0	1	19	13	1	70	50	1	58	0	999	1	30	40	99	99	99	99	1	1	2	2	2	2	6	2	2
298779	201902044446	13373026899	18	20190204	04:19:09	4217	3	18	1001	1001	999999999999999	999999999999999	335	1	6	9	25	1	1	20	100	6	80	2	31	12	2	40	50	1	83	1	999	1	32	40	99	99	99	99	2	2	1	2	2	1	10	3	2
298815	201902044521	13268236412	14	20190204	13:32:05	2354	4	18	1001	1001	999999999999999	999999999999999	315	1	5	9	26	1	1	35	75	1	0	1	58	15	2	60	50	1	37	0	999	1	30	40	99	99	99	99	1	1	2	2	2	2	4	3	2
298839	201902045538	18353845095	30	20190204	18:23:51	3553	1	18	1001	1001	999999999999999	999999999999999	410	1	6	5	23	1	1	0	100	3	50	1	18	9	1	70	50	1	68	99	999	1	32	40	99	99	99	99	1	1	2	1	2	1	9	3	2
298823	201902045949	17611627000	30	20190204	14:54:39	2205	1	18	1001	1001	999999999999999	999999999999999	385	1	1	9	10	1	1	1	100	2	85	1	21	15	1	70	50	1	999	99	999	9	99	99	99	99	99	99	9	9	9	9	9	9	999	9	3
298829	201902045976	13615751939	39	20190204	16:35:38	3640	1	18	1001	1001	999999999999999	999999999999999	410	1	7	6	11	5	2	10	95	2	80	1	25	16	1	52	70	1	41	3	999	1	30	40	99	99	99	99	1	1	2	1	2	2	8	3	2
298794	201902047215	13574273593	22	20190204	09:31:34	3586	1	18	1001	1001	999999999999999	999999999999999	402	1	6	5	11	1	1	59	85	2	85	1	18	12	1	70	50	1	74	6	999	1	32	40	99	99	99	99	2	2	2	2	1	1	6	2	2
298852	201902047563	15963319367	30	20190204	22:09:16	3236	1	18	1001	1001	999999999999999	999999999999999	117	1	6	5	11	5	2	15	85	2	50	1	18	12	1	70	50	1	62	2	999	1	32	40	99	99	99	99	2	2	2	2	2	1	6	2	2
298803	201902047621	17696748236	24	20190204	12:12:30	2817	1	18	1001	1001	999999999999999	999999999999999	383	1	1	9	10	1	1	50	20	3	50	2	23	15	1	20	1	1	40	0	999	1	30	40	99	99	99	99	1	1	2	2	2	1	6	3	2
298799	201902048669	18258326372	19	20190204	11:37:50	3208	1	18	1001	1001	999999999999999	999999999999999	396	1	6	9	11	1	1	1	100	1	0	2	20	14	1	70	50	1	49	0	999	1	30	40	99	99	99	99	2	1	2	2	2	2	4	2	2
298856	201902048840	13277605383	21	20190204	23:31:37	1509	1	18	1001	1001	999999999999999	999999999999999	117	1	6	7	13	1	1	999	999	1	0	2	27	8	1	52	50	1	999	99	999	9	99	99	99	99	99	99	9	9	9	9	9	9	999	9	3
298777	201902048869	15650740874	10	20190204	01:43:40	1758	16	18	1001	1001	999999999999999	999999999999999	409	1	6	5	11	4	1	10	70	2	70	2	19	10	1	70	50	1	999	99	999	9	99	99	99	99	99	99	9	9	9	9	9	9	999	9	3
298805	201902049073	18700480478	32	20190204	12:49:43	2711	1	18	1001	1001	999999999999999	999999999999999	404	1	1	9	10	1	1	0	90	2	100	1	18	14	1	70	50	1	78	0	999	1	31	40	99	99	99	99	1	2	2	2	2	1	6	2	2
298800	201902049778	18696056593	21	20190204	11:39:01	2970	2	11	1001	1001	999999999999999	999999999999999	315	1	1	9	10	1	1	30	75	2	75	2	28	16	1	52	60	1	72	0	999	4	32	40	99	99	99	99	1	1	2	2	2	2	8	3	2
298809	201902049787	13178502016	14	20190204	13:05:42	3496	1	18	1001	1001	999999999999999	999999999999999	396	1	1	9	10	1	1	30	85	1	0	2	24	9	1	38	5	1	75	0	999	1	32	40	99	99	99	99	1	2	2	2	2	2	4	2	2
298835	201902049900	13242810733	14	20190204	17:29:11	2736	1	18	1001	1001	999999999999999	999999999999999	316	1	6	5	12	5	4	60	70	1	0	2	22	15	1	52	50	1	31	0	999	1	30	40	99	99	99	99	1	2	2	2	2	2	2	2	2
298932	201902050542	15277608471	15	20190205	23:15:40	2958	1	11	1001	1001	999999999999999	999999999999999	396	1	6	9	11	1	2	0	100	6	80	1	19	12	1	52	50	1	82	4	999	1	32	40	99	99	99	99	2	1	2	1	1	1	10	2	2
298914	201902050565	13663189112	18	20190205	19:21:51	882	5	12	1001	1001	999999999999999	999999999999999	396	1	6	7	12	1	4	999	999	1	0	1	39	16	1	51	50	1	999	99	999	9	99	99	99	99	99	99	9	9	9	9	9	9	999	9	4
298922	201902050806	17623465131	40	20190205	20:14:26	3685	1	18	1001	1001	999999999999999	999999999999999	383	1	6	9	11	5	1	0	99	2	90	1	20	15	1	70	50	1	79	2	999	1	32	40	99	99	99	99	1	1	2	1	2	2	9	3	2
298867	201902051871	17820576434	14	20190205	04:09:25	3680	1	18	1001	1001	999999999999999	999999999999999	377	1	1	9	10	1	1	85	65	2	50	1	21	15	1	70	50	1	35	0	999	1	30	40	99	99	99	99	1	1	2	2	2	2	5	3	2
298926	201902051876	18513715151	30	20190205	21:38:05	2620	1	18	1001	1001	999999999999999	999999999999999	383	1	1	9	10	1	1	30	70	2	95	1	24	16	1	44	50	1	57	0	999	1	30	40	99	99	99	99	2	1	2	2	2	2	6	3	2
298931	201902052246	18519980312	33	20190205	22:57:49	2874	1	18	1001	1001	999999999999999	999999999999999	383	1	1	9	10	1	1	999	100	2	999	2	22	16	1	21	2	1	100	0	999	9	32	40	99	99	99	99	9	9	9	9	9	9	2	9	5
298917	201902052458	16619865040	10	20190205	19:39:22	3707	1	18	1001	1001	999999999999999	999999999999999	386	1	6	9	24	5	6	80	30	1	0	2	21	15	1	70	50	1	19	0	999	1	30	40	99	99	99	99	2	1	2	1	2	2	3	2	2
298893	201902052493	15176876186	18	20190205	12:31:25	656	1	99	1001	1001	999999999999999	999999999999999	315	1	9	9	99	9	9	999	999	9	999	1	21	13	1	70	99	1	999	99	999	9	99	99	99	99	99	99	9	9	9	9	9	9	999	9	4
298879	201902053377	18520406088	25	20190205	08:52:13	3512	1	18	1001	1001	999999999999999	999999999999999	385	1	1	9	10	1	1	0	100	2	100	2	30	15	1	52	50	1	84	0	999	1	32	40	99	99	99	99	2	2	2	2	2	2	4	2	2
298903	201902053402	13736832073	39	20190205	16:00:47	1989	8	18	1001	1001	999999999999999	999999999999999	383	1	6	9	13	5	4	80	20	1	0	2	27	9	1	21	4	1	31	1	999	1	31	40	99	99	99	99	2	2	1	2	1	1	4	3	2
298927	201902053643	13999606656	37	20190205	22:20:11	3725	1	11	1001	1001	999999999999999	999999999999999	386	1	1	9	10	1	1	15	99	2	100	1	22	15	1	44	50	1	80	8	999	1	32	40	99	99	99	99	1	1	1	2	2	2	9	2	2
298899	201902053810	17347171366	10	20190205	13:23:29	2214	7	18	1001	1001	999999999999999	999999999999999	315	1	1	9	10	1	1	100	25	1	0	2	33	8	4	52	8	1	999	99	999	9	99	99	99	99	99	99	9	9	9	9	9	9	999	9	3
298910	201902053820	18512405261	32	20190205	18:09:53	3575	1	18	1001	1001	999999999999999	999999999999999	396	1	1	9	10	1	1	45	75	1	0	2	23	15	1	35	3	1	41	0	999	1	30	40	99	99	99	99	2	1	2	2	2	2	4	2	2
298912	201902054347	18850058912	14	20190205	18:07:00	1377	1	18	1001	1001	999999999999999	999999999999999	402	1	6	5	11	1	2	20	80	2	50	1	26	15	2	38	60	1	999	99	999	9	99	99	99	99	99	99	9	9	9	9	9	9	999	9	4
298901	201902054406	18661377552	30	20190205	16:02:28	1505	1	18	1001	1001	999999999999999	999999999999999	386	1	1	9	10	1	1	15	85	2	60	1	19	14	1	70	50	1	999	99	999	9	30	40	99	99	99	99	9	9	9	9	9	9	0	9	5
298868	201902054558	18620275426	14	20190205	03:32:16	1615	1	18	1001	1001	999999999999999	999999999999999	377	1	6	5	12	1	1	999	999	2	70	2	26	15	1	44	50	1	999	99	999	9	30	40	99	99	99	99	9	9	9	9	9	9	0	9	5
298909	201902055393	17872359290	22	20190205	17:53:22	3323	1	11	1001	1001	999999999999999	999999999999999	386	1	6	9	11	1	1	20	50	5	90	2	18	13	1	70	50	1	76	4	999	1	32	40	99	99	99	99	1	1	2	1	2	2	12	2	2
298876	201902055491	15980651468	12	20190205	06:50:34	2561	1	18	1001	1001	999999999999999	999999999999999	117	1	1	9	10	1	1	15	85	1	0	2	28	18	1	70	2	1	78	0	999	1	32	40	99	99	99	99	1	2	2	2	2	2	4	2	2
298911	201902055997	18287185568	38	20190205	17:34:34	3677	1	18	1001	1001	999999999999999	999999999999999	383	1	6	9	11	1	1	0	65	3	85	1	34	15	4	52	50	1	76	2	999	1	32	40	99	99	99	99	1	2	2	2	2	1	7	3	2
298924	201902056286	15625292479	14	20190205	21:14:14	2228	1	18	1001	1001	999999999999999	999999999999999	402	1	1	9	10	1	1	80	70	1	0	1	28	16	1	52	3	1	999	99	999	9	99	99	99	99	99	99	9	9	9	9	9	9	999	9	3
298930	201902056326	18757666299	39	20190205	22:38:31	959	1	99	1001	1001	999999999999999	999999999999999	360	1	9	9	99	9	9	999	999	9	999	2	30	5	2	21	99	1	999	99	999	9	99	99	99	99	99	99	9	9	9	9	9	9	999	9	4
298865	201902056337	13588874301	39	20190205	03:36:21	691	3	18	1001	1001	999999999999999	999999999999999	410	1	6	9	11	9	6	999	90	1	0	2	40	9	4	35	50	1	999	99	999	9	99	99	99	99	99	99	9	9	9	9	9	9	999	9	4
298920	201902056803	15318998375	30	20190205	20:12:46	3643	1	11	1001	1001	999999999999999	999999999999999	396	1	1	9	10	1	1	70	25	1	0	2	18	12	1	70	3	1	24	0	999	1	30	40	99	99	99	99	2	2	2	1	2	2	1	2	2
298918	201902057170	18668574419	39	20190205	19:44:55	907	1	18	1001	1001	999999999999999	999999999999999	396	1	1	9	10	1	1	0	999	1	0	2	24	12	1	52	50	1	999	99	999	9	99	99	99	99	99	99	9	9	9	9	9	9	999	9	4
298864	201902057571	13761950896	33	20190205	02:08:21	4776	1	18	1001	1001	999999999999999	999999999999999	117	1	6	9	11	1	1	999	90	2	70	1	22	15	1	70	50	1	999	0	999	9	30	40	99	99	99	99	9	9	9	9	9	9	1	9	5
298933	201902057901	13757441943	39	20190205	23:20:10	1539	1	99	1001	1001	999999999999999	999999999999999	402	1	9	9	99	9	9	999	999	5	999	2	30	16	1	38	99	1	999	99	999	9	99	99	99	99	99	99	9	9	9	9	9	9	999	9	4
298902	201902058458	13488670834	10	20190205	16:12:28	3516	1	18	1001	1001	999999999999999	999999999999999	396	1	6	9	11	1	1	20	50	6	0	1	29	16	4	40	50	1	80	1	999	2	32	40	99	99	99	99	2	1	2	2	2	2	6	2	2
298884	201902059138	18123555174	14	20190205	09:47:44	3447	1	18	1001	1001	999999999999999	999999999999999	315	1	1	9	10	1	1	25	70	1	0	2	30	9	4	52	50	1	50	0	999	1	30	40	99	99	99	99	2	1	2	2	2	2	5	3	2
298928	201902059324	13971419775	21	20190205	22:23:11	607	1	99	1001	1001	999999999999999	999999999999999	360	1	9	9	99	9	9	999	999	9	999	2	41	99	2	99	99	1	999	99	999	9	99	99	99	99	99	99	9	9	9	9	9	9	999	9	4
298953	201902060075	13011100190	10	20190206	09:21:31	3502	1	18	1001	1001	999999999999999	999999999999999	408	1	1	9	10	1	1	80	0	1	0	1	69	9	4	60	50	1	15	0	999	1	30	40	99	99	99	99	1	2	1	2	2	2	2	2	2
298960	201902060098	13201788662	32	20190206	10:45:22	4278	1	18	1001	1001	999999999999999	999999999999999	390	1	6	9	11	1	1	40	55	1	0	2	25	15	1	40	50	1	999	99	999	9	99	99	99	99	99	99	9	9	9	9	9	9	999	9	3
298940	201902060272	15800797525	33	20190206	02:12:41	3500	1	14	1001	1001	999999999999999	999999999999999	396	1	6	5	11	1	1	30	100	2	90	2	28	12	1	35	8	1	90	0	999	1	32	40	99	99	99	99	1	2	2	2	2	1	6	2	2
298969	201902060506	13343253292	18	20190206	12:46:57	3700	1	18	1001	1001	999999999999999	999999999999999	332	1	5	9	11	1	1	10	95	2	70	1	18	12	1	70	50	1	59	10	999	1	30	40	99	99	99	99	2	1	2	2	2	2	7	3	2
299004	201902060541	18549973227	19	20190206	23:22:44	2349	1	11	1001	1001	999999999999999	999999999999999	385	1	1	9	10	1	1	50	95	1	0	2	24	12	1	43	50	1	999	99	999	9	99	99	99	99	99	99	9	9	9	9	9	9	999	9	3
298938	201902061152	15269111920	30	20190206	01:49:42	1157	1	88	1001	1001	999999999999999	999999999999999	396	1	5	9	26	1	1	0	99	2	100	2	18	13	1	52	50	1	999	99	999	9	99	99	99	99	99	99	9	9	9	9	9	9	999	9	3
298990	201902062068	17757881737	10	20190206	18:24:12	4459	5	18	1001	1001	999999999999999	999999999999999	404	1	1	9	10	1	1	10	90	6	90	1	22	12	1	50	60	1	83	3	999	1	32	40	99	99	99	99	2	2	2	2	2	1	9	2	2
298999	201902062870	15581072648	22	20190206	21:31:16	3417	1	18	1001	1001	999999999999999	999999999999999	404	1	1	9	10	1	1	50	90	1	0	1	26	16	1	39	50	1	64	0	999	1	31	40	99	99	99	99	1	2	2	2	2	2	4	2	2
298984	201902063513	18273949593	22	20190206	17:28:52	1132	1	18	1001	1001	999999999999999	999999999999999	404	1	7	6	11	1	1	0	90	2	85	2	32	10	1	35	50	1	999	99	999	9	99	99	99	99	99	99	9	9	9	9	9	9	999	9	4
298934	201902063715	18580875721	40	20190206	00:03:23	3454	1	18	1001	1001	999999999999999	999999999999999	402	1	1	9	10	1	1	10	100	2	999	1	28	12	2	52	50	1	100	6	999	1	32	40	99	99	99	99	1	1	2	1	2	2	9	2	2
299002	201902063910	15304412065	23	20190206	23:00:06	3338	1	18	1001	1001	999999999999999	999999999999999	404	1	5	9	26	1	1	50	70	1	0	2	18	11	1	70	50	1	49	0	999	1	31	40	99	99	99	99	1	2	2	1	2	1	5	2	2
299005	201902064062	18211215825	14	20190206	22:53:46	3610	1	18	1001	1001	999999999999999	999999999999999	315	1	6	9	24	1	1	0	75	2	65	2	18	11	1	70	50	1	68	3	999	1	32	40	99	99	99	99	2	2	2	1	1	1	8	3	2
298982	201902064626	18737436102	14	20190206	16:37:46	3426	5	18	1001	1001	13418792960	999999999999999	315	1	5	9	26	1	1	25	70	2	50	1	27	16	1	38	70	1	76	2	999	1	32	40	99	99	99	99	1	2	2	2	2	1	7	2	2
298952	201902064818	17625005841	24	20190206	08:30:15	3232	2	18	1001	1001	999999999999999	999999999999999	409	1	6	5	11	5	2	15	80	5	90	2	28	16	1	41	2	1	96	0	999	1	32	40	99	99	99	99	2	1	2	1	2	2	10	2	2
298954	201902065227	18620189852	14	20190206	08:19:40	3109	1	18	1001	1001	999999999999999	999999999999999	403	1	2	1	26	1	1	50	99	2	20	1	34	15	4	52	10	1	63	0	999	1	32	40	99	99	99	99	1	1	2	2	2	2	7	2	2
298935	201902065501	17673092413	22	20190206	00:42:21	3683	1	18	1001	1001	999999999999999	999999999999999	386	1	1	9	10	1	1	60	70	2	50	2	18	12	1	35	1	1	54	0	999	1	32	40	99	99	99	99	2	2	2	2	1	1	5	2	2
298998	201902065731	18716341020	40	20190206	20:51:08	3523	1	18	1001	1001	999999999999999	999999999999999	315	1	6	9	12	1	1	0	0	2	999	1	25	16	1	52	50	1	88	0	999	1	32	40	99	99	99	99	1	2	2	2	2	2	4	3	2
298992	201902066257	15910953912	10	20190206	18:52:25	2856	1	18	1001	1001	999999999999999	999999999999999	315	1	1	9	10	1	1	30	90	2	65	1	24	16	1	38	50	1	66	0	999	3	30	40	99	99	99	99	1	1	2	2	2	1	9	3	2
298950	201902066666	18754665398	30	20190206	08:20:47	5158	1	18	1001	1001	999999999999999	999999999999999	390	1	6	7	12	5	3	10	100	2	10	2	23	12	1	35	50	1	90	0	999	1	32	40	99	99	99	99	1	1	2	2	2	2	7	3	2
298945	201902067873	13640963130	21	20190206	04:39:14	3176	2	18	1001	1001	999999999999999	999999999999999	402	1	6	5	11	1	1	0	95	2	80	1	22	19	1	38	1	1	65	0	999	1	32	40	99	99	99	99	1	1	2	2	2	1	8	2	2
298961	201902069003	15901178954	10	20190206	10:49:54	3532	1	18	1001	1001	999999999999999	999999999999999	408	1	6	9	11	1	1	50	80	2	25	1	31	15	1	39	50	1	59	0	999	1	30	40	99	99	99	99	1	2	2	2	2	2	5	3	2
298972	201902069595	15597838123	16	20190206	15:10:46	1574	1	18	1001	1001	999999999999999	999999999999999	408	1	1	9	10	1	1	35	80	2	70	2	20	12	1	44	50	1	78	0	999	3	32	40	99	99	99	99	1	1	2	2	2	2	8	3	2
299021	201902070258	15667207036	18	20190207	09:16:40	2317	1	18	1001	1001	999999999999999	999999999999999	403	1	1	1	10	1	1	0	100	2	100	2	21	15	1	41	60	1	54	1	999	1	30	40	99	99	99	99	9	9	2	9	9	9	3	9	5
299043	201902070459	15188920286	18	20190207	13:29:50	3588	2	18	1001	1001	999999999999999	999999999999999	403	1	1	9	10	1	1	10	100	2	100	2	37	17	2	40	50	1	55	0	999	1	30	40	99	99	99	99	2	1	2	2	2	2	6	2	2
299039	201902071462	15707930225	25	20190207	13:44:04	3588	1	18	1001	1001	999999999999999	999999999999999	390	1	1	1	10	1	1	50	70	1	0	1	18	12	1	32	50	1	37	1	999	1	31	40	99	99	99	99	1	2	2	2	2	1	6	3	2
299069	201902071526	15275196848	30	20190207	19:22:31	1495	1	18	1001	1001	999999999999999	999999999999999	391	1	6	9	11	1	1	35	60	2	40	2	18	11	1	52	50	1	999	2	999	9	30	40	99	99	99	99	9	9	9	9	9	9	1	9	5
299060	201902071947	18615574044	30	20190207	17:56:51	4399	1	18	1001	1001	999999999999999	999999999999999	406	1	6	6	12	5	3	0	90	6	90	1	19	12	1	70	19	1	77	4	999	1	32	40	99	99	99	99	1	1	2	1	1	1	14	2	2
299063	201902072207	18846420390	18	20190207	18:32:16	3587	1	18	1001	1001	999999999999999	999999999999999	408	1	5	2	26	1	1	0	80	2	40	1	27	18	1	70	50	1	78	0	999	1	32	40	99	99	99	99	1	2	2	2	2	1	6	3	2
299041	201902072376	15594000093	14	20190207	13:03:51	3350	1	18	1001	1001	999999999999999	999999999999999	411	1	1	9	10	1	1	999	100	2	30	2	19	11	1	52	1	1	67	2	999	5	30	40	99	99	99	99	1	1	2	2	2	1	10	3	2
299084	201902072785	15063943010	36	20190207	22:26:48	2996	8	18	1001	1001	17689570470	999999999999999	332	1	1	9	10	1	1	80	60	2	40	2	21	12	1	41	4	1	26	0	999	1	30	40	99	99	99	99	2	2	2	2	2	2	1	3	2
299062	201902073042	15204537546	20	20190207	17:47:02	2540	1	18	1001	1001	999999999999999	999999999999999	391	1	1	9	10	1	1	999	999	2	999	2	30	16	1	40	50	1	999	99	999	9	99	99	99	99	99	99	9	9	9	9	9	9	999	9	3
299080	201902073391	64872733	10	20190207	22:38:05	2153	20	14	1001	1001	999999999999999	999999999999999	406	1	5	5	10	1	1	0	100	2	80	1	26	15	1	20	50	1	999	99	999	9	99	99	99	99	99	99	9	9	9	9	9	9	999	9	3
299065	201902073689	17320860818	18	20190207	17:01:41	5450	1	18	1001	1001	999999999999999	999999999999999	332	1	1	9	10	1	1	0	100	7	80	2	24	9	1	52	50	1	74	1	999	1	32	40	99	99	99	99	1	1	2	2	2	1	12	2	2
299071	201902074066	13205058792	39	20190207	19:12:02	3508	1	18	1001	1001	999999999999999	999999999999999	332	1	1	9	10	1	1	0	70	2	85	1	19	9	1	52	70	1	86	0	999	1	32	40	99	99	99	99	1	1	2	2	2	1	8	3	2
299045	201902074195	15776613418	20	20190207	14:38:48	1550	2	18	1001	1001	999999999999999	999999999999999	335	1	6	9	11	1	1	0	100	1	0	1	19	13	1	70	50	1	999	99	999	9	99	99	99	99	99	99	9	9	9	9	9	9	999	9	4
299073	201902075666	18170694912	25	20190207	21:07:23	2479	1	18	1001	1001	999999999999999	999999999999999	408	1	1	9	10	1	1	999	90	2	75	1	22	6	2	21	50	1	999	99	999	9	99	99	99	99	99	99	9	9	9	9	9	9	999	9	3
299029	201902076432	13032481481	26	20190207	10:19:08	3427	1	18	1001	1001	999999999999999	999999999999999	403	1	6	9	25	1	1	0	100	2	100	2	23	12	1	52	50	1	67	0	999	1	32	40	99	99	99	99	1	2	1	1	2	2	7	2	2
299050	201902076545	15501922155	17	20190207	16:21:38	3281	1	18	1001	1001	999999999999999	999999999999999	408	1	1	9	10	1	1	999	999	2	999	1	19	12	1	70	50	1	37	0	999	1	30	40	99	99	99	99	1	2	1	2	2	1	4	3	2
299030	201902076823	13012251823	17	20190207	11:24:18	5678	1	18	1001	1001	999999999999999	999999999999999	390	1	1	1	10	1	1	0	100	5	80	1	22	15	1	70	50	1	36	0	999	1	30	40	99	99	99	99	1	1	2	1	1	1	12	3	2
299026	201902077112	13901179515	10	20190207	10:11:13	2520	1	18	1001	1001	999999999999999	999999999999999	411	1	6	2	26	1	1	999	999	1	0	2	52	16	5	38	50	1	999	99	999	9	99	99	99	99	99	99	9	9	9	9	9	9	999	9	4
299056	201902079125	13840177210	26	20190207	16:38:22	1838	6	18	1001	1001	999999999999999	999999999999999	406	1	6	6	11	1	8	50	100	1	0	1	36	16	1	44	50	1	999	99	999	9	99	99	99	99	99	99	9	9	9	9	9	9	999	9	3
299046	201902079902	67613113	10	20190207	14:48:38	2191	65	13	1001	1001	81765692	56195061	410	1	6	9	23	1	1	20	20	1	0	2	57	11	1	52	50	1	17	0	999	1	30	40	99	99	99	99	1	1	2	1	2	2	6	2	2
299142	201902080497	17606578527	39	20190208	20:25:37	2610	1	18	1001	1001	999999999999999	999999999999999	316	1	1	9	10	1	1	0	100	2	70	2	18	12	1	70	50	1	34	1	999	1	30	40	99	99	99	99	1	1	1	2	2	1	9	3	2
299147	201902080718	17358665710	34	20190208	21:38:34	3413	1	18	1001	1001	999999999999999	999999999999999	403	1	1	1	10	1	1	45	999	6	80	2	18	12	1	70	50	1	46	1	999	2	31	40	99	99	99	99	2	1	2	2	1	1	10	2	2
299146	201902081025	18166576542	40	20190208	21:44:43	3478	2	18	1001	1001	999999999999999	999999999999999	316	1	1	9	10	1	1	10	100	4	80	1	27	12	1	52	50	1	92	0	999	1	32	40	99	99	99	99	1	2	2	2	2	2	8	3	2
299088	201902082044	15291677942	32	20190208	01:51:33	3535	1	18	1001	1001	999999999999999	999999999999999	406	1	1	1	10	1	1	20	70	7	60	1	18	14	1	70	18	1	68	2	999	3	30	40	99	99	99	99	1	1	2	2	1	1	14	2	2
299140	201902082312	18217294536	33	20190208	18:27:59	3572	1	18	1001	1001	999999999999999	999999999999999	316	1	6	9	25	1	1	0	98	2	50	1	22	14	1	70	50	1	41	0	999	1	31	40	99	99	99	99	2	1	2	2	1	2	6	3	2
299105	201902082459	13586473252	19	20190208	09:31:38	2792	1	18	1001	1001	999999999999999	999999999999999	335	1	6	9	11	1	2	10	90	1	0	2	18	13	1	70	50	1	43	0	999	1	30	40	99	99	99	99	1	1	2	2	2	2	5	3	2
299139	201902082667	17311865256	34	20190208	17:50:15	3479	1	18	1001	1001	999999999999999	999999999999999	387	1	6	9	14	1	1	999	90	2	50	2	43	15	2	39	50	1	999	0	999	9	30	40	99	99	99	99	9	9	9	9	9	9	1	9	5
299111	201902083147	18687477409	38	20190208	11:51:03	1348	1	18	1001	1001	999999999999999	999999999999999	411	1	6	9	24	1	1	85	20	1	0	2	18	12	1	70	50	1	999	99	999	9	99	99	99	99	99	99	9	9	9	9	9	9	999	9	4
299093	201902083171	13215077687	12	20190208	04:01:35	2482	1	18	1001	1001	999999999999999	999999999999999	408	1	6	9	25	1	1	25	80	1	0	1	20	12	1	70	50	1	999	99	999	9	99	99	99	99	99	99	9	9	9	9	9	9	999	9	3
299110	201902083567	18177912681	15	20190208	11:33:44	3473	1	18	1001	1001	999999999999999	999999999999999	410	1	1	9	10	1	1	0	90	2	70	1	28	16	1	38	50	1	60	0	999	1	31	40	99	99	99	99	2	1	2	2	2	2	6	3	2
299095	201902083852	18810123715	34	20190208	04:35:00	3708	1	18	1001	1001	999999999999999	999999999999999	391	1	5	9	26	1	1	45	80	2	30	1	26	18	1	39	50	1	65	0	999	1	32	40	99	99	99	99	1	1	2	2	2	1	8	3	2
299106	201902084687	17640184310	26	20190208	09:38:18	3696	1	18	1001	1001	999999999999999	999999999999999	386	1	1	9	10	1	1	50	80	1	0	1	26	16	1	38	50	1	59	0	999	1	30	40	99	99	99	99	2	1	2	2	2	1	7	2	2
299151	201902084831	18668800278	39	20190208	23:10:48	3228	1	18	1001	1001	999999999999999	999999999999999	316	1	1	9	10	1	1	20	100	2	60	2	26	12	1	38	6	1	49	0	999	1	30	40	99	99	99	99	2	1	2	2	2	2	5	3	2
299117	201902085237	18818693250	12	20190208	13:18:54	3384	1	18	1001	1001	999999999999999	999999999999999	335	1	6	9	13	1	1	30	100	2	99	2	24	9	1	52	50	1	83	2	999	1	32	40	99	99	99	99	2	2	2	2	2	2	5	3	2
299153	201902085297	16638570203	19	20190208	23:43:36	830	1	18	1001	1001	999999999999999	999999999999999	403	1	5	1	26	1	1	999	999	1	0	2	18	11	1	70	50	1	999	99	999	9	99	99	99	99	99	99	9	9	9	9	9	9	999	9	4
299128	201902085689	13811686583	10	20190208	15:10:46	3692	1	18	1001	1001	999999999999999	999999999999999	386	1	6	9	11	1	1	50	70	1	0	2	30	18	1	38	12	1	57	0	999	1	31	40	99	99	99	99	1	2	2	2	2	2	4	2	2
299098	201902085804	13246708539	24	20190208	08:02:23	3721	1	18	1001	1001	999999999999999	999999999999999	386	1	1	9	10	1	1	70	65	1	0	2	22	10	1	21	3	1	69	1	999	1	31	40	99	99	99	99	1	1	2	2	2	1	7	2	2
299109	201902086451	17853085860	30	20190208	09:38:10	3763	1	18	1001	1001	999999999999999	999999999999999	411	1	1	9	10	1	1	25	70	2	40	2	28	16	1	40	50	1	73	0	999	1	32	40	99	99	99	99	2	2	2	2	2	2	4	3	2
299092	201902086898	13838127955	19	20190208	03:04:42	2374	1	18	1001	1001	999999999999999	999999999999999	391	1	6	9	11	1	1	25	75	2	75	2	33	19	1	38	14	1	999	99	999	9	99	99	99	99	99	99	9	9	9	9	9	9	999	9	3
299094	201902087274	18924639057	12	20190208	04:52:15	2480	1	18	1001	1001	999999999999999	999999999999999	408	1	1	9	10	1	1	999	999	1	0	1	32	18	1	38	50	1	999	99	999	9	99	99	99	99	99	99	9	9	9	9	9	9	999	9	3
299086	201902088072	15602585651	19	20190208	00:14:15	3348	1	18	1001	1001	999999999999999	999999999999999	406	1	1	1	10	1	1	60	60	2	50	2	38	9	2	44	20	1	59	0	999	1	31	40	99	99	99	99	1	1	2	2	2	1	7	2	2
299129	201902088391	13164329077	19	20190208	14:48:42	2941	2	18	1001	1001	999999999999999	999999999999999	411	1	6	9	11	5	2	30	90	2	80	1	26	16	2	52	50	1	94	0	999	1	32	40	99	99	99	99	2	2	2	2	2	2	4	3	2
299100	201902089156	13260189017	10	20190208	08:51:55	2943	1	13	1001	1001	999999999999999	999999999999999	410	1	1	9	10	1	1	999	999	1	0	2	23	3	1	42	15	1	34	0	999	1	30	40	99	99	99	99	1	1	2	2	2	2	3	3	2
299225	201902090005	18964905132	33	20190209	23:26:47	3544	1	11	1001	1001	999999999999999	999999999999999	411	1	1	9	10	1	1	40	90	2	10	1	21	14	1	70	50	1	82	0	999	1	32	40	99	99	99	99	1	1	2	2	1	2	8	3	2
299179	201902090632	18135110911	31	20190209	09:32:59	1371	1	18	1001	1001	999999999999999	999999999999999	404	1	1	9	10	1	1	0	100	2	999	1	29	16	2	40	50	1	999	99	999	9	99	99	99	99	99	99	9	9	9	9	9	9	999	9	3
299189	201902090775	18825457425	14	20190209	12:06:06	2303	4	18	1001	1001	13802430203	999999999999999	404	1	6	5	12	5	3	60	70	2	50	2	25	16	1	38	50	1	46	0	999	1	30	40	99	99	99	99	2	2	2	2	2	1	3	2	2
299160	201902090811	15946286357	20	20190209	04:41:51	2623	1	18	1001	1001	999999999999999	999999999999999	316	1	1	9	10	1	1	0	100	3	80	1	43	16	4	39	50	1	88	0	999	1	32	40	99	99	99	99	2	2	2	2	2	1	5	3	2
299220	201902090820	15133505840	18	20190209	21:24:37	2979	1	10	1001	1001	999999999999999	999999999999999	335	1	6	9	25	1	1	30	100	2	90	1	53	12	4	44	10	1	30	0	999	1	31	40	99	99	99	99	2	2	2	2	1	2	4	3	2
299176	201902091617	18377750108	15	20190209	09:44:10	1540	2	18	1001	1001	999999999999999	999999999999999	386	1	6	9	11	5	7	999	999	2	999	2	50	12	6	43	50	1	999	99	999	9	99	99	99	99	99	99	9	9	9	9	9	9	999	9	4
299205	201902092203	13919048864	13	20190209	12:43:33	3601	1	18	1001	1001	999999999999999	999999999999999	117	1	6	9	11	1	1	70	90	2	60	2	28	15	1	52	50	1	78	0	999	1	32	40	99	99	99	99	1	1	2	2	2	2	6	2	2
299218	201902092369	13841642593	26	20190209	19:33:24	1576	2	11	1001	1001	999999999999999	999999999999999	335	1	6	9	25	1	1	50	100	6	99	1	21	0	2	52	70	1	999	10	999	9	30	40	99	99	99	99	9	9	9	9	9	9	1	9	5
299206	201902092863	18653029691	30	20190209	14:14:35	3557	1	18	1001	1001	999999999999999	999999999999999	396	1	6	7	12	1	4	0	80	2	45	1	23	9	1	52	50	1	77	2	999	1	30	40	99	99	99	99	1	2	2	1	1	1	9	2	2
299204	201902093715	13954817373	30	20190209	13:31:53	2615	2	18	1001	1001	17863993123	999999999999999	404	1	1	9	10	1	1	45	999	1	0	2	23	16	1	38	50	1	74	0	999	1	32	40	99	99	99	99	1	2	2	1	2	1	5	2	2
299201	201902094159	15611241274	10	20190209	13:08:22	1013	1	10	1001	1001	999999999999999	999999999999999	396	1	1	9	10	1	1	70	65	1	0	1	50	16	2	39	50	1	999	99	999	9	99	99	99	99	99	99	9	9	9	9	9	9	999	9	3
299185	201902094317	14797708518	15	20190209	11:46:50	3163	1	18	1001	1001	999999999999999	999999999999999	396	1	1	9	10	1	1	20	70	1	0	1	26	12	1	34	50	1	65	0	999	1	32	40	99	99	99	99	1	1	2	2	2	2	6	2	2
299216	201902094421	13976689281	17	20190209	16:49:02	3679	1	18	1001	1001	999999999999999	999999999999999	409	1	1	9	10	1	1	20	85	2	75	1	19	5	1	35	6	1	65	3	999	1	32	40	99	99	99	99	1	1	1	1	1	1	12	2	2
299207	201902094473	15625858889	14	20190209	14:37:18	2487	1	18	1001	1001	999999999999999	999999999999999	383	1	5	9	24	1	1	10	85	2	50	2	22	13	1	70	50	1	77	0	999	1	32	40	99	99	99	99	2	1	1	2	2	1	8	3	2
299222	201902095316	18508362071	34	20190209	23:13:29	2400	1	11	1001	1001	999999999999999	999999999999999	335	1	1	9	10	1	1	20	90	6	99	2	21	12	1	52	2	1	62	2	999	4	30	40	99	99	99	99	9	9	2	9	9	9	7	9	5
299174	201902096288	15695526338	11	20190209	09:19:35	1739	1	18	1001	1001	999999999999999	999999999999999	117	1	1	9	10	1	1	999	999	2	999	2	23	15	1	43	50	1	999	99	999	9	99	99	99	99	99	99	9	9	9	9	9	9	999	9	4
299178	201902097127	17611040006	10	20190209	09:52:09	2442	1	18	1001	1001	999999999999999	999999999999999	396	1	1	9	10	1	1	95	30	1	0	2	27	17	1	44	60	1	999	99	999	9	99	99	99	99	99	99	9	9	9	9	9	9	999	9	3
299173	201902097814	15373303175	18	20190209	09:35:42	5494	1	18	1001	1001	999999999999999	999999999999999	390	1	5	9	25	1	1	30	65	2	50	1	21	14	1	70	50	1	49	0	999	1	31	40	99	99	99	99	1	1	2	1	2	2	7	3	2
299169	201902098998	18434187404	31	20190209	08:39:37	2014	1	18	1001	1001	999999999999999	999999999999999	383	1	1	9	10	1	1	15	70	2	70	1	22	16	1	70	50	1	81	0	999	1	32	40	99	99	99	99	1	1	2	1	2	2	8	3	2
299215	201902099486	15522531804	35	20190209	17:03:43	3682	1	18	1001	1001	999999999999999	999999999999999	410	1	1	9	10	1	1	0	95	3	100	1	25	15	4	39	1	1	70	0	999	1	30	40	99	99	99	99	2	1	2	2	2	2	6	3	2
299209	201902099497	13263424620	10	20190209	15:02:38	4749	2	13	1001	1001	999999999999999	999999999999999	386	1	1	9	10	1	1	80	70	1	0	1	47	15	2	38	50	1	23	0	999	1	30	40	99	99	99	99	1	1	2	2	2	1	5	2	2
299186	201902099708	15073668511	22	20190209	11:28:59	2830	1	11	1001	1001	999999999999999	999999999999999	117	1	6	7	25	5	4	0	0	2	999	1	52	16	4	52	50	1	999	99	999	9	99	99	99	99	99	99	9	9	9	9	9	9	999	9	3
299217	201902099987	18077233106	15	20190209	16:38:40	3330	1	18	1001	1001	999999999999999	999999999999999	411	1	1	9	10	1	1	0	70	2	60	2	19	11	1	38	50	1	59	1	999	4	30	40	99	99	99	99	2	2	2	2	2	1	7	3	2
299268	201902100213	15757333712	39	20190210	15:16:08	706	1	99	1001	1001	999999999999999	999999999999999	404	1	1	9	10	1	1	999	90	7	70	1	24	99	1	99	99	1	999	99	999	9	99	99	99	99	99	99	9	9	9	9	9	9	999	9	4
299303	201902100697	15850609852	24	20190210	23:07:34	3149	1	18	1001	1001	999999999999999	999999999999999	316	1	1	9	10	1	1	20	100	2	80	2	18	13	1	70	50	1	32	0	999	1	30	40	99	99	99	99	1	1	2	2	2	2	6	2	2
299302	201902101213	15632325747	18	20190210	22:54:24	3644	1	18	1001	1001	999999999999999	999999999999999	401	1	6	2	11	1	1	0	100	2	90	1	22	12	1	42	1	1	87	0	999	1	32	40	99	99	99	99	1	2	2	2	2	2	5	2	2
299299	201902101508	13484192007	39	20190210	22:08:31	1690	1	18	1001	1001	999999999999999	999999999999999	117	1	7	9	13	1	1	999	999	1	0	1	27	12	3	21	50	1	999	99	999	9	99	99	99	99	99	99	9	9	9	9	9	9	999	9	4
299239	201902101644	15512866668	18	20190210	08:18:30	3611	1	18	1001	1001	999999999999999	999999999999999	396	1	1	9	10	1	1	0	95	2	50	1	31	15	4	44	50	1	73	3	999	1	31	40	99	99	99	99	1	2	2	2	2	1	7	2	2
299240	201902101940	18201516812	10	20190210	08:06:17	3514	1	18	1001	1001	999999999999999	999999999999999	383	1	6	9	11	1	1	0	95	1	0	1	30	16	1	52	4	1	88	0	999	1	32	40	99	99	99	99	1	2	2	2	2	1	5	3	2
299298	201902101958	13921624083	24	20190210	22:21:58	5140	1	18	1001	1001	999999999999999	999999999999999	412	1	1	9	10	1	1	20	80	4	50	2	25	12	1	52	50	1	77	0	999	1	32	40	99	99	99	99	1	1	1	1	1	1	14	3	2
299293	201902102550	18015763232	34	20190210	20:48:08	3114	1	18	1001	1001	999999999999999	999999999999999	412	1	5	9	10	1	1	50	85	2	45	1	26	15	1	33	50	1	50	0	999	1	31	40	99	99	99	99	1	1	2	1	2	2	8	3	2
299278	201902102599	18315944339	30	20190210	17:21:23	953	6	18	1001	1001	15726092565	999999999999999	401	1	6	9	14	5	5	30	30	1	0	2	18	12	1	70	50	1	999	99	999	9	99	99	99	99	99	99	9	9	9	9	9	9	999	9	3
299246	201902102940	15201293753	10	20190210	08:31:04	3771	1	18	1001	1001	999999999999999	999999999999999	332	1	1	9	10	1	1	10	90	2	65	2	26	17	7	31	9	1	47	0	999	1	30	40	99	99	99	99	1	1	2	2	2	2	5	3	2
299245	201902103756	13540620579	34	20190210	09:36:03	3161	1	18	1001	1001	999999999999999	999999999999999	383	1	6	9	11	1	1	30	50	6	999	2	19	11	1	52	50	1	78	3	999	1	32	40	99	99	99	99	1	1	2	1	1	1	14	3	2
299227	201902103873	17621807008	33	20190210	02:42:37	2038	1	18	1001	1001	999999999999999	999999999999999	335	1	7	6	11	1	1	1	100	5	100	1	19	14	1	70	2	1	999	99	999	9	99	99	99	99	99	99	9	9	9	9	9	9	999	9	4
299262	201902104286	13558667485	34	20190210	13:23:11	1171	1	18	1001	1001	999999999999999	999999999999999	383	1	1	9	10	1	1	999	999	2	999	2	28	16	1	35	50	1	999	99	999	9	99	99	99	99	99	99	9	9	9	9	9	9	999	9	4
299247	201902104313	19938553688	34	20190210	10:08:13	2536	1	18	1001	1001	999999999999999	999999999999999	404	1	1	9	10	1	1	10	99	2	50	2	34	12	2	43	50	1	66	0	999	1	32	40	99	99	99	99	2	2	2	2	2	2	4	2	2
299280	201902104394	15533687903	18	20190210	17:15:40	3693	1	10	1001	1001	999999999999999	999999999999999	316	1	6	9	16	1	1	999	80	2	5	1	47	16	2	40	50	1	15	0	999	1	30	40	99	99	99	99	2	2	2	2	2	2	3	2	2
299279	201902104446	13643340440	18	20190210	17:24:41	3628	1	18	1001	1001	999999999999999	999999999999999	412	1	7	9	12	1	2	35	90	2	15	2	35	9	4	44	50	1	71	1	999	1	32	40	99	99	99	99	1	1	2	2	2	2	8	3	2
299236	201902104587	18203328299	18	20190210	06:45:07	2989	1	18	1001	1001	999999999999999	999999999999999	409	1	6	9	11	1	1	0	100	2	100	1	24	16	1	52	50	1	999	99	999	9	99	99	99	99	99	99	9	9	9	9	9	9	999	9	3
299249	201902105533	13715592162	14	20190210	10:22:28	2568	1	18	1001	1001	999999999999999	999999999999999	385	1	1	9	10	1	1	999	100	2	100	1	29	15	1	38	50	1	999	99	999	9	99	99	99	99	99	99	9	9	9	9	9	9	999	9	3
299288	201902105709	18723293803	40	20190210	19:39:52	847	1	99	1001	1001	999999999999999	999999999999999	117	1	9	9	99	9	9	999	999	2	999	1	23	99	1	99	99	1	999	99	999	9	99	99	99	99	99	99	9	9	9	9	9	9	999	9	4
299255	201902105874	18144348076	34	20190210	11:50:24	1053	1	18	1001	1001	999999999999999	999999999999999	383	1	6	5	13	5	4	10	90	5	80	1	18	13	1	99	50	1	999	99	999	9	99	99	99	99	99	99	9	9	9	9	9	9	999	9	4
299275	201902106010	18010288330	10	20190210	16:12:21	1726	1	11	1001	1001	999999999999999	999999999999999	117	1	5	9	24	1	1	0	100	2	100	1	44	15	2	40	50	1	999	99	999	9	99	99	99	99	99	99	9	9	9	9	9	9	999	9	4
299250	201902106134	13509040136	14	20190210	10:29:34	3730	1	18	1001	1001	999999999999999	999999999999999	332	1	1	9	10	1	1	60	95	1	0	1	24	15	1	70	50	1	55	0	999	1	31	40	99	99	99	99	1	2	2	2	2	2	3	3	2
299233	201902106582	15632405858	18	20190210	04:44:01	3567	1	11	1001	1001	999999999999999	999999999999999	411	1	1	9	10	1	1	999	999	2	75	1	24	15	1	44	50	1	69	0	999	2	32	40	99	99	99	99	1	1	2	2	2	1	8	3	2
299296	201902106806	18661904693	30	20190210	20:53:08	2939	4	18	1001	1001	999999999999999	999999999999999	316	1	1	9	10	1	1	0	90	2	60	1	32	16	1	38	99	1	78	0	999	1	32	40	99	99	99	99	2	1	2	2	2	1	7	2	2
299241	201902107193	18641715381	26	20190210	08:43:13	2401	3	12	1001	1001	999999999999999	999999999999999	404	1	6	9	12	1	4	20	85	2	20	2	27	16	1	40	2	1	999	99	999	9	99	99	99	99	99	99	9	9	9	9	9	9	999	9	3
299295	201902107725	15682745894	13	20190210	21:14:47	1776	2	18	1001	1001	999999999999999	999999999999999	117	1	1	9	10	1	1	50	100	1	0	2	18	12	1	70	50	1	37	0	999	1	31	40	99	99	99	99	2	1	2	1	1	1	8	2	2
299283	201902107905	18284886386	34	20190210	18:35:02	3879	1	18	1001	1001	999999999999999	999999999999999	401	1	6	9	24	1	1	80	90	1	0	2	19	13	1	70	50	1	37	0	999	1	30	40	99	99	99	99	2	2	2	2	2	1	2	2	2
299285	201902108263	18995285517	28	20190210	18:05:40	3692	1	18	1001	1001	999999999999999	999999999999999	117	1	6	9	11	1	1	70	40	1	0	1	23	16	1	40	50	1	999	1	999	9	30	40	99	99	99	99	9	9	9	9	9	9	1	9	5
299244	201902108758	18208801326	39	20190210	09:39:06	3607	1	18	1001	1001	999999999999999	999999999999999	396	1	6	9	11	1	1	999	93	2	93	1	23	7	1	35	1	1	74	4	999	3	32	40	99	99	99	99	1	2	2	1	2	2	7	2	2
299226	201902109096	18616647172	33	20190210	02:11:56	1099	1	18	1001	1001	999999999999999	999999999999999	409	1	6	9	16	1	1	999	999	3	999	1	43	99	2	99	99	1	999	99	999	9	99	99	99	99	99	99	9	9	9	9	9	9	999	9	4
299231	201902109607	13082340875	18	20190210	05:00:02	2149	2	18	1001	1001	999999999999999	999999999999999	410	1	1	9	10	9	9	999	80	1	0	1	43	12	2	42	5	1	999	99	999	9	99	99	99	99	99	99	9	9	9	9	9	9	999	9	3
299394	201902110055	13755150807	33	20190211	21:48:08	3695	1	18	1001	1001	999999999999999	999999999999999	383	1	1	9	10	1	1	999	999	2	80	1	25	16	1	52	70	1	84	4	999	1	32	40	99	99	99	99	1	1	2	2	2	1	7	3	2
299375	201902110342	15881895841	34	20190211	16:10:36	2347	1	18	1001	1001	999999999999999	999999999999999	383	1	1	9	10	1	1	20	90	2	999	2	19	13	1	70	50	1	80	2	999	5	32	40	99	99	99	99	1	2	2	2	2	1	8	3	2
299316	201902110439	17863803568	30	20190211	07:36:48	3157	2	11	1001	1001	999999999999999	999999999999999	412	1	1	9	10	1	1	999	100	2	100	1	23	16	1	52	50	1	98	0	999	1	32	40	99	99	99	99	1	2	2	2	2	2	4	3	2
299367	201902110791	18212046183	16	20190211	14:41:50	2546	14	18	1001	1001	999999999999999	999999999999999	391	1	6	9	11	1	1	5	60	2	20	1	20	10	1	21	50	1	999	99	999	9	99	99	99	99	99	99	9	9	9	9	9	9	999	9	3
299376	201902110863	15340219191	33	20190211	15:20:17	3324	1	18	1001	1001	999999999999999	999999999999999	332	1	5	2	24	1	1	60	999	1	0	1	50	15	4	44	16	1	999	99	999	9	30	40	99	99	99	99	9	9	9	9	9	9	0	9	5
299399	201902111260	17702754079	21	20190211	23:40:21	3000	1	18	1001	1001	999999999999999	999999999999999	386	1	1	9	10	1	1	50	65	1	0	2	25	18	1	34	50	1	62	0	999	1	32	40	99	99	99	99	1	1	2	2	2	2	6	1	2
299307	201902111367	13857964041	39	20190211	01:19:16	2404	1	18	1001	1001	999999999999999	999999999999999	117	1	1	9	10	1	1	0	100	2	50	2	27	12	2	44	50	1	999	99	999	9	99	99	99	99	99	99	9	9	9	9	9	9	999	9	3
299335	201902111414	17538570756	19	20190211	10:53:50	862	1	18	1001	1001	999999999999999	999999999999999	391	1	1	9	10	1	1	999	999	9	85	2	25	16	1	70	50	1	999	99	999	9	99	99	99	99	99	99	9	9	9	9	9	9	999	9	4
299377	201902111936	13972044490	21	20190211	16:56:47	960	1	99	1001	1001	999999999999999	999999999999999	360	1	9	9	99	9	9	999	999	9	999	2	19	14	1	70	99	1	999	99	999	9	99	99	99	99	99	99	9	9	9	9	9	9	999	9	4
299350	201902112399	13522929959	10	20190211	13:10:25	641	12	18	1002	1001	999999999999999	999999999999999	406	1	2	6	24	1	1	100	100	2	50	2	29	16	1	44	50	1	999	99	999	9	30	40	99	99	99	99	9	9	9	9	9	9	0	9	3
299388	201902112525	15029232184	19	20190211	19:19:25	3158	2	18	1001	1001	999999999999999	999999999999999	386	1	1	9	10	1	1	999	75	2	999	2	24	6	1	52	50	1	74	3	999	1	32	40	99	99	99	99	1	1	2	2	2	1	8	2	2
299400	201902112702	17603092956	19	20190211	23:55:50	3264	1	18	1001	1001	999999999999999	999999999999999	396	1	1	9	10	1	1	99	90	2	0	1	19	9	1	38	50	1	60	0	999	1	30	40	99	99	99	99	1	1	1	2	2	2	7	2	2
299306	201902113220	13480536196	14	20190211	00:07:46	3848	1	18	1001	1001	999999999999999	999999999999999	117	1	6	9	11	5	2	0	100	3	95	1	24	15	1	52	50	1	77	0	999	1	32	40	99	99	99	99	1	1	2	2	2	1	8	2	2
299361	201902113564	18562058997	30	20190211	14:40:06	2979	1	18	1001	1001	999999999999999	999999999999999	404	1	1	9	10	1	1	20	80	1	0	2	18	12	1	70	50	1	31	0	999	1	30	40	99	99	99	99	2	2	2	2	2	1	3	2	2
299313	201902113835	18726571800	11	20190211	04:41:09	3679	1	18	1001	1001	999999999999999	999999999999999	401	1	6	5	11	1	1	35	100	2	100	1	19	13	1	70	50	1	88	4	999	1	32	40	99	99	99	99	1	2	2	2	2	2	6	2	2
299371	201902113847	15522550639	10	20190211	15:48:15	4003	1	11	1001	1001	999999999999999	999999999999999	406	1	1	1	10	1	1	5	100	6	90	2	24	9	1	44	1	1	88	2	999	1	32	40	99	99	99	99	1	2	2	1	1	1	12	2	2
299391	201902114727	18506386297	30	20190211	20:35:14	3671	1	18	1001	1001	999999999999999	999999999999999	396	1	1	9	10	1	1	12	98	2	97	1	29	16	4	40	50	1	92	99	999	1	32	40	99	99	99	99	1	1	2	1	1	2	9	2	2
299328	201902115056	15080270030	12	20190211	09:32:24	4398	1	18	1001	1001	999999999999999	999999999999999	390	1	1	1	10	1	1	10	75	2	30	1	27	12	2	52	50	1	84	0	999	1	30	40	99	99	99	99	1	2	1	2	2	2	6	3	2
299385	201902115212	2133966879	33	20190211	18:36:18	3493	1	18	1001	1001	999999999999999	999999999999999	396	1	1	9	10	1	1	30	80	1	0	2	36	16	2	38	50	1	57	0	999	1	32	40	99	99	99	99	1	2	2	2	2	2	4	2	2
299310	201902115576	18176361007	15	20190211	02:18:13	2846	2	18	1001	1001	999999999999999	999999999999999	117	1	6	9	11	1	1	0	100	2	50	1	29	15	1	38	50	1	999	99	999	9	99	99	99	99	99	99	9	9	9	9	9	9	999	9	3
299349	201902115832	13840550875	26	20190211	13:09:52	3648	1	18	1001	1001	999999999999999	999999999999999	336	1	1	9	10	1	1	0	100	2	100	1	24	16	1	38	50	1	90	0	999	1	32	40	99	99	99	99	2	2	2	2	2	2	4	3	2
299372	201902115851	18700848057	32	20190211	16:06:26	3697	2	18	1001	1001	999999999999999	999999999999999	386	1	6	9	11	1	1	20	70	3	999	1	20	99	1	70	50	1	90	0	999	1	32	40	99	99	99	99	2	1	2	2	2	1	7	1	2
299397	201902115951	15110085309	10	20190211	22:44:20	2786	1	18	1001	1001	999999999999999	999999999999999	396	1	1	9	10	1	1	80	5	1	0	2	35	12	2	35	50	1	26	0	999	1	30	40	99	99	99	99	2	1	2	2	2	2	2	2	2
299393	201902116622	18979997765	25	20190211	21:29:22	3607	1	18	1001	1001	999999999999999	999999999999999	386	1	1	9	10	1	1	0	100	1	0	2	18	11	1	70	50	1	62	0	999	1	32	40	99	99	99	99	1	1	2	2	2	1	7	1	2
299331	201902116763	15588697257	30	20190211	09:47:51	2857	1	18	1001	1001	999999999999999	999999999999999	404	1	1	9	10	1	1	80	50	1	0	1	32	16	1	38	50	1	35	0	999	1	31	40	99	99	99	99	2	2	2	2	2	2	1	2	2
299356	201902117520	15078648006	15	20190211	13:00:45	3697	1	18	1001	1001	999999999999999	999999999999999	332	1	1	9	10	1	1	25	70	2	50	2	22	15	1	70	50	1	60	0	999	1	32	40	99	99	99	99	1	2	2	2	2	1	6	3	2
299329	201902117711	13561140235	30	20190211	08:50:24	3296	1	88	1001	1001	999999999999999	999999999999999	391	1	1	9	10	1	1	30	70	2	75	1	23	12	1	38	50	1	51	5	999	1	32	40	99	99	99	99	2	1	2	1	1	1	10	3	2
299351	201902117727	15803767296	19	20190211	12:46:54	3252	1	18	1001	1001	999999999999999	999999999999999	391	1	6	9	11	5	2	0	80	6	80	1	24	16	1	52	50	1	67	2	999	1	32	40	99	99	99	99	2	1	2	2	2	1	11	3	2
299381	201902117782	13266111502	14	20190211	18:03:25	3701	1	18	1001	1001	999999999999999	999999999999999	383	1	6	7	13	5	4	20	75	2	65	1	23	7	2	44	60	1	76	0	999	1	32	40	99	99	99	99	1	1	2	2	1	1	9	3	2
299347	201902118955	13383918917	19	20190211	12:53:54	3564	1	18	1001	1001	999999999999999	999999999999999	404	1	5	9	26	1	1	40	80	1	0	1	25	15	1	38	50	1	49	0	999	1	30	40	99	99	99	99	1	2	2	1	2	1	5	2	2
299308	201902119003	18638029799	19	20190211	02:02:48	3139	1	18	1001	1001	999999999999999	999999999999999	412	1	6	9	11	1	1	25	80	1	0	2	31	19	2	38	50	1	49	0	999	1	30	40	99	99	99	99	1	1	2	2	2	2	5	3	2
299334	201902119856	15806572226	30	20190211	09:13:39	4253	1	18	1001	1001	999999999999999	999999999999999	332	1	1	9	10	1	1	1	100	5	70	2	25	12	1	20	50	1	58	0	999	1	32	40	99	99	99	99	1	2	2	2	2	1	9	2	2
299404	201902120259	16676930423	14	20190212	00:41:21	4151	2	18	1001	1001	999999999999999	999999999999999	360	1	1	9	10	1	1	0	100	7	100	2	21	15	1	52	3	1	999	0	999	9	30	40	99	99	99	99	9	9	9	9	9	9	4	9	5
299427	201902120715	13711799333	14	20190212	10:22:33	1205	1	18	1001	1001	999999999999999	999999999999999	403	1	1	1	10	1	1	999	85	2	80	2	45	12	1	52	50	1	999	99	999	9	99	99	99	99	99	99	9	9	9	9	9	9	999	9	3
299407	201902120778	15861489224	24	20190212	05:18:14	2234	1	18	1001	1001	999999999999999	999999999999999	396	1	1	9	10	1	1	0	100	2	80	1	18	11	1	20	1	1	43	1	999	1	31	40	99	99	99	99	1	2	2	2	2	2	5	2	2
299476	201902122992	17878030915	15	20190212	23:20:19	3511	1	18	1001	1001	999999999999999	999999999999999	385	1	6	9	11	1	2	0	100	2	0	1	22	15	1	38	50	1	71	0	999	1	30	40	99	99	99	99	1	1	2	2	1	1	9	2	2
299420	201902123478	15039886555	19	20190212	08:57:19	1664	1	18	1001	1001	999999999999999	999999999999999	403	1	1	1	10	1	1	999	0	1	0	1	31	99	1	52	99	1	999	99	999	9	99	99	99	99	99	99	9	9	9	9	9	9	999	9	3
299458	201902123837	15152290610	24	20190212	17:29:49	3291	1	18	1001	1001	999999999999999	999999999999999	336	1	1	9	10	1	1	0	100	2	0	2	31	15	1	42	5	1	83	0	999	1	32	40	99	99	99	99	1	1	1	2	2	2	8	3	2
299419	201902124335	15939233172	19	20190212	09:16:06	3540	1	18	1001	1001	999999999999999	999999999999999	388	1	1	9	10	1	1	5	80	2	60	1	18	8	1	52	50	1	48	0	999	1	30	40	99	99	99	99	1	1	2	2	1	2	7	3	2
299423	201902124407	13758108423	39	20190212	09:59:03	3630	3	18	1001	1001	999999999999999	999999999999999	387	1	1	9	10	1	1	70	70	1	0	2	21	12	1	20	50	1	20	0	999	1	30	40	99	99	99	99	2	2	2	1	2	2	2	2	2
299473	201902125196	18690253866	37	20190212	23:00:49	4059	2	18	1001	1001	999999999999999	999999999999999	336	1	1	9	10	1	1	40	90	2	60	2	26	16	1	38	50	1	69	0	999	1	30	40	99	99	99	99	1	2	2	2	2	2	5	3	2
299403	201902125529	18507921156	25	20190212	00:50:38	3682	1	18	1001	1001	999999999999999	999999999999999	386	1	1	9	10	1	1	30	60	2	70	2	23	12	1	52	1	1	74	1	999	4	32	40	99	99	99	99	1	1	2	2	2	1	10	2	2
299445	201902125612	18337128196	19	20190212	14:49:15	3882	1	18	1001	1001	999999999999999	999999999999999	387	1	3	9	24	1	1	40	60	2	40	1	26	16	1	39	50	1	77	0	999	1	32	40	99	99	99	99	2	2	2	2	2	2	4	3	2
299448	201902125968	18938089768	14	20190212	14:33:14	3216	1	16	1001	1001	999999999999999	999999999999999	391	1	1	9	10	1	1	999	90	1	0	2	49	11	2	22	12	1	999	99	999	9	99	99	99	99	99	99	9	9	9	9	9	9	999	9	3
299437	201902126350	17674767554	22	20190212	12:54:02	3968	1	11	1001	1001	999999999999999	999999999999999	388	1	5	6	11	1	1	50	50	2	50	1	22	15	1	70	50	1	70	1	999	1	32	40	99	99	99	99	2	2	2	2	2	2	5	3	2
299467	201902126558	17716565615	18	20190212	20:44:34	5285	1	18	1001	1001	999999999999999	999999999999999	390	1	6	5	11	1	1	10	80	2	80	2	50	16	4	52	1	1	79	2	999	1	32	40	99	99	99	99	1	2	2	1	2	1	8	3	2
299415	201902126563	18356008376	11	20190212	08:05:41	2738	1	18	1001	1001	999999999999999	999999999999999	406	1	6	6	25	1	2	40	80	2	50	2	25	18	1	70	7	1	64	0	999	1	30	40	99	99	99	99	2	2	2	2	2	1	5	2	2
299477	201902126839	15011513415	10	20190212	23:00:08	2237	1	12	1001	1001	999999999999999	999999999999999	315	1	6	5	11	5	2	10	90	1	0	2	19	12	1	70	50	1	58	0	999	1	31	40	99	99	99	99	1	2	2	1	2	2	5	3	2
299418	201902127462	18519335608	10	20190212	08:29:10	3166	1	18	1001	1001	999999999999999	999999999999999	391	1	1	9	10	1	1	20	85	2	5	1	28	16	1	52	5	1	74	0	999	1	32	40	99	99	99	99	1	2	2	2	2	2	5	3	2
299461	201902127491	15614917832	18	20190212	19:16:41	3557	1	18	1001	1001	999999999999999	999999999999999	404	1	7	6	25	1	1	10	20	2	999	1	22	12	1	52	50	1	999	99	999	9	30	40	99	99	99	99	9	9	9	9	9	9	0	9	5
299434	201902128454	13488778447	10	20190212	12:53:28	4140	1	18	1001	1001	999999999999999	999999999999999	406	1	6	6	24	1	1	0	90	2	90	1	27	20	1	70	20	1	77	0	999	1	32	40	99	99	99	99	1	1	2	2	2	1	8	2	2
299460	201902128604	18646626972	20	20190212	18:53:16	2571	3	18	1001	1001	13224628200	999999999999999	385	1	6	5	11	1	2	50	90	1	0	2	18	12	1	70	3	1	999	99	999	9	99	99	99	99	99	99	9	9	9	9	9	9	999	9	3
299416	201902128826	13353393069	21	20190212	08:34:46	3120	1	18	1001	1001	999999999999999	999999999999999	387	1	6	9	11	5	2	90	50	1	0	1	24	16	1	34	50	1	19	2	999	1	30	40	99	99	99	99	2	2	2	2	2	2	2	3	2
299414	201902129232	13510254878	14	20190212	06:58:30	1129	1	18	1001	1001	999999999999999	999999999999999	396	1	6	5	12	1	4	999	999	9	999	1	32	99	2	44	3	1	999	99	999	9	99	99	99	99	99	99	9	9	9	9	9	9	999	9	4
299449	201902129292	18950475181	12	20190212	14:28:24	4385	1	18	1001	1001	999999999999999	999999999999999	411	1	6	9	24	1	1	20	75	6	60	1	18	11	1	70	50	1	70	2	999	1	32	40	99	99	99	99	1	1	2	2	1	2	12	3	2
299435	201902129733	18399560321	10	20190212	11:55:46	5397	1	18	1001	1001	999999999999999	999999999999999	411	1	6	5	11	5	2	0	99	4	60	1	32	20	4	70	2	1	71	1	999	1	32	40	99	99	99	99	1	1	2	2	2	1	12	3	2
299471	201902129740	19927451499	35	20190212	20:24:35	3720	1	18	1001	1001	999999999999999	999999999999999	315	1	6	9	11	1	8	60	90	2	40	1	18	12	1	70	50	1	67	0	999	1	30	40	99	99	99	99	1	1	2	1	2	1	8	3	2
299501	201902130222	17515084430	30	20190213	10:08:42	3659	1	18	1001	1001	999999999999999	999999999999999	387	1	6	9	25	1	1	999	75	1	0	2	22	9	1	52	50	1	78	1	999	1	32	40	99	99	99	99	1	1	2	2	2	2	7	2	2
299524	201902130311	13560411128	14	20190213	19:06:38	1747	1	14	1001	1001	999999999999999	999999999999999	391	1	3	9	26	1	1	80	45	1	0	1	34	15	1	52	50	1	999	99	999	9	99	99	99	99	99	99	9	9	9	9	9	9	999	9	3
299487	201902130844	18798092493	19	20190213	03:18:12	2313	1	18	1001	1001	999999999999999	999999999999999	404	1	1	9	10	1	1	0	100	2	100	2	32	17	1	52	50	1	38	0	999	1	31	40	99	99	99	99	2	2	2	2	2	2	3	2	2
299534	201902131857	13522992250	10	20190213	23:00:27	3419	1	11	1001	1001	999999999999999	999999999999999	391	1	1	9	10	1	1	80	80	1	0	1	24	16	1	38	4	1	29	0	999	1	30	40	99	99	99	99	2	2	2	2	2	2	1	3	2
299488	201902132099	17397977321	24	20190213	04:30:49	3455	1	18	1001	1001	999999999999999	999999999999999	404	1	1	9	10	1	1	50	90	1	0	1	20	15	1	70	50	1	64	0	999	1	31	40	99	99	99	99	1	1	2	2	2	1	7	2	2
299515	201902132416	18599115536	37	20190213	16:12:21	3688	1	18	1001	1001	999999999999999	999999999999999	411	1	1	9	10	1	1	50	50	1	0	1	27	16	2	39	50	1	35	0	999	1	30	40	99	99	99	99	1	1	1	2	2	1	7	3	2
299502	201902132737	15850546198	24	20190213	10:01:51	3318	1	18	1001	1001	999999999999999	999999999999999	388	1	6	9	12	5	7	20	95	2	80	1	32	19	4	38	50	1	56	2	999	1	30	40	99	99	99	99	1	1	2	2	1	2	9	3	2
299499	201902132942	18696725791	40	20190213	09:45:36	1077	1	18	1001	1001	999999999999999	999999999999999	387	1	1	9	10	1	1	999	999	3	70	1	18	12	1	42	50	1	999	99	999	9	99	99	99	99	99	99	9	9	9	9	9	9	999	9	4
299498	201902133082	18653969288	30	20190213	08:17:51	3653	1	11	1001	1001	999999999999999	999999999999999	403	1	6	1	24	1	1	35	0	1	0	1	47	9	1	38	50	1	33	0	999	1	30	40	99	99	99	99	1	1	2	2	2	1	5	3	2
299535	201902134081	18688994992	38	20190213	23:24:02	3879	1	18	1001	1001	999999999999999	999999999999999	406	1	1	1	10	1	1	50	40	2	30	2	33	16	1	44	70	1	75	0	999	1	32	40	99	99	99	99	1	1	2	2	2	1	7	2	2
299491	201902134105	17708486981	12	20190213	05:53:45	858	1	18	1001	1001	999999999999999	999999999999999	315	1	5	9	26	1	1	999	75	2	999	1	36	16	2	52	20	1	999	99	999	9	99	99	99	99	99	99	9	9	9	9	9	9	999	9	3
299514	201902134716	17621880150	14	20190213	16:07:41	4422	1	18	1001	1001	999999999999999	999999999999999	406	1	6	6	24	1	1	10	100	6	90	1	27	18	2	33	1	1	68	1	999	1	30	40	99	99	99	99	1	1	2	2	2	2	11	2	2
299522	201902136005	18968171850	39	20190213	18:45:04	4591	1	11	1001	1001	999999999999999	999999999999999	406	1	6	6	12	1	1	2	95	6	92	1	20	12	1	70	20	1	78	10	999	1	32	40	99	99	99	99	1	2	2	2	2	1	10	2	2
299489	201902137467	18370737010	25	20190213	04:23:39	2685	1	18	1001	1001	999999999999999	999999999999999	315	1	6	9	11	1	1	30	100	1	0	1	22	9	1	35	50	1	999	99	999	9	99	99	99	99	99	99	9	9	9	9	9	9	999	9	3
299526	201902137568	13261611255	21	20190213	18:28:54	5355	1	18	1001	1001	999999999999999	999999999999999	332	1	6	9	25	1	1	5	100	7	80	2	28	17	1	70	50	1	82	1	999	1	32	40	99	99	99	99	1	2	2	2	2	2	9	3	2
299525	201902138111	17621854025	30	20190213	18:33:03	3642	1	18	1001	1001	999999999999999	999999999999999	411	1	6	9	23	1	1	9	60	2	59	2	25	12	1	41	50	1	92	1	999	1	32	40	99	99	99	99	1	2	1	2	1	2	8	2	2
299504	201902138216	17852417630	30	20190213	11:51:26	2505	1	18	1001	1001	999999999999999	999999999999999	387	1	1	9	10	1	1	999	999	2	999	2	18	12	1	70	50	1	49	0	999	1	30	40	99	99	99	99	1	1	2	2	2	1	5	2	2
299492	201902139669	17680246177	22	20190213	05:45:28	3284	1	18	1001	1001	999999999999999	999999999999999	385	1	1	9	10	1	1	20	90	2	75	2	19	12	1	70	50	1	78	1	999	1	32	40	99	99	99	99	1	1	2	2	1	1	10	2	2
299583	201902140219	18526833914	35	20190214	14:21:24	2230	1	18	1001	1001	999999999999999	999999999999999	412	1	1	9	10	1	1	50	80	2	65	1	24	16	1	38	50	1	59	0	999	1	32	40	99	99	99	99	2	2	2	2	2	1	5	2	2
299614	201902140591	18661315771	30	20190214	22:58:55	3162	1	18	1001	1001	999999999999999	999999999999999	403	1	6	9	11	1	1	999	85	2	85	2	19	13	1	70	50	1	68	0	999	1	30	40	99	99	99	99	1	1	2	2	1	2	7	2	2
299582	201902140690	17310696370	10	20190214	14:20:04	3654	1	18	1001	1001	999999999999999	999999999999999	408	1	5	6	11	1	1	0	100	1	0	1	39	16	1	38	15	1	89	1	999	1	32	40	99	99	99	99	1	2	2	1	2	2	6	2	2
299600	201902140865	15600213789	10	20190214	19:39:00	3663	1	18	1001	1001	999999999999999	999999999999999	388	1	6	9	16	1	1	30	75	2	70	2	28	15	1	38	4	1	73	1	999	1	32	40	99	99	99	99	2	1	2	2	2	1	8	3	2
299602	201902140911	13982247876	34	20190214	19:51:41	2771	1	18	1001	1001	999999999999999	999999999999999	403	1	1	1	10	1	1	999	999	2	999	2	21	12	1	52	50	1	56	0	999	1	30	40	99	99	99	99	2	1	2	2	2	1	5	2	2
299613	201902141124	18711858636	22	20190214	22:52:46	3651	1	18	1001	1001	999999999999999	999999999999999	387	1	1	9	10	1	1	10	999	2	70	1	20	99	1	39	50	1	73	2	999	1	30	40	99	99	99	99	1	1	2	2	2	1	8	2	2
299595	201902141301	17622710996	35	20190214	16:21:32	3380	1	18	1001	1001	999999999999999	999999999999999	388	1	1	9	10	1	1	20	80	2	65	1	18	11	1	70	50	1	77	4	999	1	32	40	99	99	99	99	1	1	2	2	1	1	10	3	2
299550	201902141605	13213086423	19	20190214	06:30:26	3670	2	18	1001	1001	999999999999999	999999999999999	411	1	6	9	24	1	1	0	100	2	90	1	18	12	1	70	50	1	82	1	999	1	32	40	99	99	99	99	2	1	2	2	2	1	8	3	2
299593	201902142310	13931984719	18	20190214	14:53:05	3318	1	18	1001	1001	999999999999999	999999999999999	377	1	6	9	16	1	1	50	999	2	30	1	47	16	2	40	50	1	33	0	999	1	31	40	99	99	99	99	2	2	2	2	2	2	2	2	2
299597	201902142696	13233048773	31	20190214	17:20:42	3639	1	18	1001	1001	999999999999999	999999999999999	387	1	1	9	10	1	1	10	80	1	0	1	23	14	1	70	50	1	61	0	999	1	31	40	99	99	99	99	1	1	2	2	2	1	8	3	2
299570	201902142852	17348239659	24	20190214	11:55:08	3286	1	18	1001	1001	999999999999999	999999999999999	412	1	1	9	10	1	1	20	80	2	5	2	22	10	1	70	50	1	58	0	999	1	31	40	99	99	99	99	1	1	2	2	2	1	8	2	2
299537	201902143329	18511099159	10	20190214	00:42:28	2588	1	18	1001	1001	999999999999999	999999999999999	332	1	1	9	10	1	1	85	30	1	0	1	46	15	6	33	50	1	999	99	999	9	99	99	99	99	99	99	9	9	9	9	9	9	999	9	3
299591	201902143612	13478970665	26	20190214	15:05:10	2451	1	18	1001	1001	999999999999999	999999999999999	412	1	1	9	10	1	1	999	75	2	25	2	36	16	3	38	7	1	999	99	999	9	99	99	99	99	99	99	9	9	9	9	9	9	999	9	3
299560	201902143666	18331016915	18	20190214	09:09:55	1822	1	18	1001	1001	999999999999999	999999999999999	408	1	3	9	24	1	1	50	100	2	50	1	25	9	4	52	50	1	999	0	999	9	30	40	99	99	99	99	9	9	9	9	9	9	1	9	5
299559	201902143986	18535983818	31	20190214	08:26:37	3291	1	18	1001	1001	999999999999999	999999999999999	401	1	6	9	11	1	1	0	100	2	90	1	19	12	1	70	50	1	80	2	999	5	32	40	99	99	99	99	1	1	2	2	2	1	10	2	2
299558	201902144759	18889291324	17	20190214	08:57:43	4591	1	18	1001	1001	999999999999999	999999999999999	410	1	7	9	25	1	1	0	90	2	90	2	55	12	2	52	60	1	75	0	999	1	32	40	99	99	99	99	2	2	1	1	1	1	8	2	2
299539	201902145048	13466656060	17	20190214	01:46:21	5975	1	18	1001	1001	999999999999999	999999999999999	332	1	6	9	11	1	1	0	100	3	100	1	30	16	1	38	60	1	69	0	999	1	30	40	99	99	99	99	1	1	2	1	2	1	9	2	2
299588	201902145183	13297914407	40	20190214	12:45:31	2993	1	18	1001	1001	999999999999999	999999999999999	377	1	1	9	10	1	1	30	50	1	0	1	23	16	1	39	70	1	57	0	999	1	30	40	99	99	99	99	1	1	2	2	2	1	8	2	2
299586	201902145438	15698266144	30	20190214	10:10:28	2220	1	18	1001	1001	999999999999999	999999999999999	377	1	1	9	10	1	1	85	45	1	0	2	22	13	1	70	50	1	22	0	999	1	30	40	99	99	99	99	1	1	2	2	2	1	4	2	2
299563	201902145707	13723198039	19	20190214	09:47:08	4143	1	18	1001	1001	999999999999999	999999999999999	408	1	1	9	10	1	1	10	100	4	999	2	24	16	1	38	50	1	58	0	999	1	30	40	99	99	99	99	2	1	2	1	2	2	10	3	2
299561	201902145867	13253347155	33	20190214	08:48:26	2806	1	18	1001	1001	999999999999999	999999999999999	409	1	1	9	10	1	1	50	90	1	0	1	25	16	1	38	2	1	68	0	999	1	30	40	99	99	99	99	2	1	2	2	2	1	7	2	2
299551	201902146115	18897922534	25	20190214	06:49:37	3725	1	18	1001	1001	999999999999999	999999999999999	332	1	5	9	11	1	1	25	80	6	75	1	23	9	1	52	60	1	61	3	999	1	31	40	99	99	99	99	1	2	2	2	2	1	10	2	2
299568	201902146542	13934740709	31	20190214	10:39:25	3525	1	18	1001	1001	999999999999999	999999999999999	410	1	5	9	10	1	1	50	95	1	0	1	34	16	2	39	50	1	39	0	999	1	31	40	99	99	99	99	1	2	2	2	2	1	4	3	2
299540	201902146543	18511071130	10	20190214	03:36:12	2659	3	18	1001	1001	999999999999999	999999999999999	391	1	1	1	10	1	1	35	75	1	0	1	34	16	1	52	7	1	999	99	999	9	30	40	99	99	99	99	9	9	9	9	9	9	0	9	3
299574	201902146612	18893729461	13	20190214	12:37:40	3434	1	18	1001	1001	999999999999999	999999999999999	408	1	6	2	11	1	1	0	100	2	90	1	25	16	1	52	50	1	94	8	999	3	32	40	99	99	99	99	1	2	2	1	2	1	9	3	2
299596	201902146965	15830350023	18	20190214	17:16:40	1284	1	11	1001	1001	999999999999999	999999999999999	403	1	1	1	10	1	1	60	70	2	20	1	20	12	1	35	50	1	999	2	999	9	30	40	99	99	99	99	9	9	9	9	9	9	2	9	5
299548	201902147015	18105368666	30	20190214	06:40:32	5007	1	18	1001	1001	999999999999999	999999999999999	406	1	1	1	10	1	1	30	100	4	70	1	40	15	2	44	20	1	100	1	999	1	32	40	99	99	99	99	1	1	2	2	1	1	13	2	2
299569	201902147182	17702414060	26	20190214	10:02:36	3818	1	18	1001	1001	999999999999999	999999999999999	409	1	1	9	10	1	1	0	100	5	90	1	30	16	1	52	4	1	76	0	999	1	32	40	99	99	99	99	1	1	2	2	2	1	11	2	2
299587	201902147685	15376293865	30	20190214	14:28:12	1318	6	18	1001	1001	999999999999999	999999999999999	409	1	3	9	24	1	1	45	40	1	0	1	37	9	4	52	50	1	55	0	999	1	31	40	99	99	99	99	1	2	2	2	2	1	4	2	6
299541	201902147814	18390362487	22	20190214	03:46:13	3635	1	18	1001	1001	999999999999999	999999999999999	411	1	1	9	10	1	1	80	50	3	999	2	28	16	2	38	50	1	76	0	999	1	32	40	99	99	99	99	2	2	2	2	2	1	3	3	2
299604	201902147889	15026460596	33	20190214	21:30:31	3671	1	18	1001	1001	999999999999999	999999999999999	388	1	6	5	11	1	1	20	100	2	80	2	29	19	1	38	1	1	87	5	999	1	30	40	99	99	99	99	2	1	1	2	1	1	10	3	2
299585	201902149140	13624057993	26	20190214	08:54:12	2952	1	18	1001	1001	999999999999999	999999999999999	377	1	6	9	11	5	2	50	90	2	100	1	25	16	1	52	50	1	49	0	999	1	30	40	99	99	99	99	1	1	2	2	2	2	6	2	2
299562	201902149423	13801299367	10	20190214	09:35:45	849	1	18	1001	1001	999999999999999	999999999999999	412	1	6	9	24	9	1	0	100	2	999	2	60	16	2	60	50	1	999	99	999	9	99	99	99	99	99	99	9	9	9	9	9	9	999	9	3
299571	201902149522	18621284373	33	20190214	12:21:46	2287	1	18	1001	1001	999999999999999	999999999999999	401	1	1	9	10	1	1	10	90	2	85	1	22	16	1	38	60	1	74	0	999	1	32	40	99	99	99	99	1	2	2	2	2	1	6	2	2
299577	201902149685	13822327058	14	20190214	13:34:57	3489	1	18	1001	1001	999999999999999	999999999999999	401	1	1	9	10	1	1	0	100	3	90	2	28	16	3	40	3	1	78	0	999	1	32	40	99	99	99	99	1	2	1	2	2	1	7	2	2
299605	201902149875	15196802368	34	20190214	21:51:50	1292	2	18	1001	1001	999999999999999	999999999999999	387	1	6	5	11	5	2	0	99	2	80	1	18	9	1	52	50	1	999	99	999	9	99	99	99	99	99	99	9	9	9	9	9	9	999	9	4
299665	201902150036	15685128905	16	20190215	13:41:38	3076	1	18	1001	1001	999999999999999	999999999999999	402	1	6	9	11	1	2	0	90	2	50	1	28	16	1	39	3	1	62	0	999	1	32	40	99	99	99	99	1	1	2	2	2	2	7	1	2
299626	201902150456	18792297369	11	20190215	08:28:35	6155	1	18	1001	1001	999999999999999	999999999999999	401	1	6	5	11	1	1	35	85	6	90	1	19	13	1	70	50	1	80	15	999	1	32	40	99	99	99	99	1	1	1	1	1	2	14	2	2
299696	201902150459	13934075797	31	20190215	23:29:26	879	3	18	1001	1001	999999999999999	999999999999999	335	1	5	9	26	1	1	999	999	1	0	1	18	11	1	70	15	1	999	99	999	9	99	99	99	99	99	99	9	9	9	9	9	9	999	9	4
299625	201902150650	13773403956	24	20190215	08:20:34	3323	1	18	1001	1001	999999999999999	999999999999999	385	1	6	9	25	1	1	0	100	2	100	1	22	15	1	52	50	1	67	0	999	1	30	40	99	99	99	99	1	2	2	1	2	2	6	2	2
299645	201902150882	13621273185	10	20190215	10:31:55	2185	1	18	1001	1001	999999999999999	999999999999999	396	1	1	9	10	1	1	10	100	1	0	1	25	16	1	39	50	1	999	99	999	9	99	99	99	99	99	99	9	9	9	9	9	9	999	9	3
299635	201902151411	13121056511	10	20190215	08:30:55	3681	1	18	1001	1001	999999999999999	999999999999999	360	1	6	9	11	1	1	0	999	3	100	2	28	19	1	70	4	1	71	0	999	1	32	40	99	99	99	99	2	1	2	2	1	2	6	2	2
299693	201902151988	15226071138	19	20190215	21:48:07	1831	1	18	1001	1001	999999999999999	999999999999999	335	1	6	9	11	5	2	0	90	5	90	1	22	12	1	70	50	1	999	99	999	9	99	99	99	99	99	99	9	9	9	9	9	9	999	9	4
299681	201902152052	15004263391	26	20190215	15:10:34	2899	4	12	1001	1001	999999999999999	999999999999999	383	1	6	7	11	5	2	999	100	6	100	1	21	13	1	70	50	1	87	2	999	1	32	40	99	99	99	99	1	1	2	1	1	1	13	3	2
299674	201902152581	13652043114	10	20190215	14:40:43	3625	1	18	1001	1001	999999999999999	999999999999999	401	1	1	9	10	1	1	0	95	2	70	1	25	19	1	70	3	1	69	0	999	1	32	40	99	99	99	99	1	2	2	2	2	1	6	2	2
299642	201902152672	15723143078	40	20190215	10:10:44	3510	1	18	1001	1001	999999999999999	999999999999999	383	1	6	9	11	1	1	0	70	2	999	1	20	14	1	70	50	1	80	0	999	5	32	40	99	99	99	99	1	1	2	2	2	1	9	3	2
299697	201902152951	13154076956	32	20190215	23:34:22	1274	1	18	1001	1001	999999999999999	999999999999999	409	1	9	9	99	9	9	999	999	2	999	2	23	16	1	35	99	1	999	99	999	9	99	99	99	99	99	99	9	9	9	9	9	9	999	9	4
299692	201902153206	15217619479	22	20190215	19:38:49	2099	1	18	1001	1001	999999999999999	999999999999999	335	1	1	9	10	1	1	999	999	5	999	2	21	15	1	35	60	1	999	99	999	9	99	99	99	99	99	99	9	9	9	9	9	9	999	9	4
299623	201902153610	15847975201	27	20190215	08:05:19	3610	1	18	1001	1001	999999999999999	999999999999999	396	1	1	9	10	1	1	50	90	2	40	2	20	12	1	70	50	1	61	0	999	1	30	40	99	99	99	99	1	1	2	2	2	2	7	2	2
299649	201902154425	17740696723	33	20190215	11:00:34	1413	1	18	1001	1001	999999999999999	999999999999999	117	1	1	9	10	1	1	999	100	2	100	2	20	14	1	70	60	1	999	99	999	9	99	99	99	99	99	99	9	9	9	9	9	9	999	9	4
299673	201902154781	18675929137	14	20190215	13:17:39	3698	1	18	1001	1001	999999999999999	999999999999999	117	1	1	9	10	1	1	70	70	1	0	2	27	16	5	38	50	1	49	0	999	1	30	40	99	99	99	99	2	1	2	2	2	1	5	2	2
299678	201902154966	18260270747	33	20190215	14:56:18	3652	1	18	1001	1001	999999999999999	999999999999999	402	1	1	9	10	1	1	75	80	1	0	2	25	15	1	38	70	1	54	0	999	1	30	40	99	99	99	99	2	1	2	2	2	2	4	2	2
299628	201902155149	18830243704	18	20190215	08:52:39	1903	1	18	1001	1001	999999999999999	999999999999999	412	1	1	9	10	1	1	90	85	2	50	1	19	12	1	70	50	1	69	0	999	1	32	40	99	99	99	99	1	2	2	2	2	2	4	3	2
299651	201902155386	13521204015	10	20190215	10:22:11	3691	1	18	1001	1001	999999999999999	999999999999999	360	1	1	9	10	1	1	10	90	1	0	1	57	16	2	38	50	1	67	0	999	1	32	40	99	99	99	99	2	2	2	2	2	2	3	3	2
299644	201902155503	17686891804	30	20190215	09:35:48	3092	2	11	1001	1001	999999999999999	999999999999999	117	1	1	9	10	1	1	10	90	4	999	2	18	10	1	70	50	1	59	0	999	1	32	40	99	99	99	99	2	2	2	2	2	2	7	2	2
299620	201902156418	18744844601	16	20190215	04:59:55	4898	1	18	1001	1001	999999999999999	999999999999999	387	1	1	9	10	1	1	999	100	7	50	1	23	16	1	52	50	1	73	3	999	1	32	40	99	99	99	99	1	1	2	2	2	1	11	3	2
299684	201902156798	18129370993	37	20190215	16:11:21	2191	1	18	1001	1001	999999999999999	999999999999999	409	1	1	9	10	1	1	30	90	2	70	2	49	15	2	52	20	1	87	0	999	5	32	40	99	99	99	99	1	2	2	2	1	2	7	2	2
299618	201902157681	15195570867	24	20190215	03:00:43	3696	1	18	1001	1001	999999999999999	999999999999999	389	1	1	9	10	1	1	30	65	2	50	2	25	16	1	38	50	1	85	0	999	1	32	40	99	99	99	99	1	1	1	1	1	1	11	2	2
299637	201902158561	64674193	10	20190215	09:39:28	2551	3	15	1001	1001	999999999999999	999999999999999	402	1	6	9	16	5	2	50	75	1	0	2	59	16	6	38	50	1	999	99	999	9	99	99	99	99	99	99	9	9	9	9	9	9	999	9	3
299616	201902158906	13177215300	21	20190215	00:27:44	3058	1	18	1001	1001	999999999999999	999999999999999	403	1	5	9	26	1	1	10	75	2	55	2	22	16	1	38	50	1	69	2	999	2	32	40	99	99	99	99	1	2	2	1	2	2	7	2	2
299667	201902158980	13414802713	14	20190215	13:49:05	3582	1	18	1001	1001	999999999999999	999999999999999	412	1	6	5	11	1	1	30	100	3	95	2	25	9	1	52	50	1	91	1	999	1	32	40	99	99	99	99	1	2	2	2	2	1	10	3	2
299647	201902159689	15202628987	28	20190215	10:37:46	1750	2	18	1001	1001	999999999999999	999999999999999	385	1	1	9	10	1	1	0	90	2	80	1	29	16	4	52	50	1	63	0	999	1	30	40	99	99	99	99	1	2	2	2	1	2	6	2	2
299643	201902159796	15265815875	30	20190215	10:22:50	2960	1	18	1001	1001	999999999999999	999999999999999	402	1	6	9	23	1	1	10	45	2	60	1	30	16	1	38	50	1	80	3	999	1	32	40	99	99	99	99	1	1	1	2	1	2	12	2	2
299622	201902159866	13015590513	14	20190215	06:04:16	3704	1	18	1001	1001	999999999999999	999999999999999	403	1	6	9	13	1	1	5	90	2	90	2	26	16	1	33	1	1	61	1	999	1	31	40	99	99	99	99	1	1	2	2	2	1	9	2	2
299729	201902160256	64962494	10	20190216	10:24:39	3517	1	15	1001	1001	999999999999999	999999999999999	360	1	1	9	10	1	1	50	90	1	0	1	74	12	2	60	50	1	999	99	999	9	99	99	99	99	99	99	9	9	9	9	9	9	999	9	3
299775	201902160262	18518169157	10	20190216	16:26:45	2739	1	18	1001	1001	999999999999999	999999999999999	117	1	1	9	10	1	1	0	100	2	90	2	25	12	1	21	4	1	999	0	999	9	30	40	99	99	99	99	9	9	9	9	9	9	1	9	5
299777	201902160622	17132106884	37	20190216	17:46:39	3672	1	18	1001	1001	999999999999999	999999999999999	316	1	6	7	11	1	1	0	100	2	100	1	26	14	1	52	50	1	25	0	999	1	30	40	99	99	99	99	1	1	2	1	2	2	7	3	2
299765	201902160889	18520352000	14	20190216	15:13:50	2349	1	18	1001	1001	999999999999999	999999999999999	383	1	1	9	10	1	1	40	75	2	60	1	35	15	4	38	14	1	77	0	999	1	32	40	99	99	99	99	1	2	2	2	2	1	6	3	2
299737	201902161054	17320444907	40	20190216	12:01:46	4023	1	18	1001	1001	999999999999999	999999999999999	402	1	1	9	10	1	1	100	0	4	90	1	20	14	1	70	2	1	46	9	999	1	30	40	99	99	99	99	1	1	2	2	2	1	9	2	2
299766	201902161173	19959909752	12	20190216	14:11:41	4569	1	18	1001	1001	999999999999999	999999999999999	315	1	1	9	10	1	1	0	99	4	80	1	31	11	1	52	50	1	90	0	999	1	32	40	99	99	99	99	1	2	2	2	2	2	8	3	2
299756	201902161926	15868060425	39	20190216	13:42:40	2685	1	18	1001	1001	999999999999999	999999999999999	360	1	1	9	10	1	1	0	90	2	50	2	28	16	1	38	50	1	60	0	999	1	31	40	99	99	99	99	2	2	2	2	2	1	4	3	2
299731	201902162125	13324977531	38	20190216	11:41:19	3564	1	18	1001	1001	999999999999999	999999999999999	404	1	6	5	25	5	2	20	100	2	80	1	27	15	1	99	50	1	94	0	999	1	32	40	99	99	99	99	1	2	1	2	2	2	6	2	2
299708	201902162449	18688354883	14	20190216	08:08:11	2529	1	18	1001	1001	999999999999999	999999999999999	383	1	6	5	11	1	1	75	65	2	85	1	28	15	1	52	50	1	69	0	999	1	32	40	99	99	99	99	2	1	2	2	2	2	5	3	2
299717	201902162819	18147008056	27	20190216	08:18:07	3698	2	18	1001	1001	999999999999999	999999999999999	411	1	6	9	24	1	1	25	60	2	60	2	43	9	4	35	50	1	68	1	999	1	32	40	99	99	99	99	1	1	1	2	2	2	9	3	2
299785	201902162965	15313015031	10	20190216	20:04:38	3554	2	18	1001	1001	999999999999999	999999999999999	316	1	1	1	10	1	1	30	70	2	50	2	26	12	1	44	6	1	72	0	999	1	32	40	99	99	99	99	1	2	2	2	2	2	5	3	2
299705	201902163149	18658198373	39	20190216	03:34:41	4568	1	18	1001	1001	999999999999999	999999999999999	408	1	5	9	26	1	1	999	100	4	999	2	23	13	1	70	60	1	999	99	999	9	99	99	99	99	99	99	9	9	9	9	9	9	999	9	3
299712	201902163228	15637701216	14	20190216	09:08:11	3304	1	18	1001	1001	999999999999999	999999999999999	406	1	6	5	25	1	1	50	100	2	70	1	20	12	7	20	1	1	84	0	999	5	32	40	99	99	99	99	2	1	2	2	2	2	7	2	2
299771	201902163254	18829247683	32	20190216	14:55:53	4966	1	18	1001	1001	999999999999999	999999999999999	402	1	1	9	10	1	1	80	70	4	80	2	25	15	1	38	50	1	39	0	999	1	31	40	99	99	99	99	2	1	2	1	2	2	8	2	2
299772	201902163416	18006270017	24	20190216	16:17:32	1318	1	18	1001	1001	999999999999999	999999999999999	401	1	6	9	13	1	4	50	50	2	50	2	23	12	1	20	4	1	999	99	999	9	99	99	99	99	99	99	9	9	9	9	9	9	999	9	4
299728	201902163818	15903605729	19	20190216	10:14:25	2336	2	18	1001	1001	999999999999999	999999999999999	315	1	1	9	10	1	1	100	0	1	0	1	32	15	1	52	50	1	999	99	999	9	99	99	99	99	99	99	9	9	9	9	9	9	999	9	3
299776	201902164262	13272707854	40	20190216	17:32:40	1968	1	18	1001	1001	999999999999999	999999999999999	412	1	6	9	11	5	2	0	90	2	50	1	35	16	4	52	50	1	999	99	999	9	99	99	99	99	99	99	9	9	9	9	9	9	999	9	3
299716	201902164321	15614673271	30	20190216	08:26:36	3287	1	18	1001	1001	999999999999999	999999999999999	315	1	1	9	10	1	1	0	100	2	80	1	26	15	1	38	50	1	51	0	999	1	30	40	99	99	99	99	2	1	2	2	2	2	6	3	2
299699	201902164533	13983926736	40	20190216	00:44:56	3581	1	18	1001	1001	999999999999999	999999999999999	335	1	1	9	10	1	1	999	80	2	50	2	36	15	4	44	50	1	58	0	999	2	32	40	99	99	99	99	1	1	2	2	2	2	6	3	2
299754	201902164800	15078375857	27	20190216	14:20:22	3393	1	18	1001	1001	999999999999999	999999999999999	396	1	6	5	11	1	1	65	75	2	25	1	20	14	1	70	50	1	37	0	999	1	30	40	99	99	99	99	1	2	2	2	2	2	3	2	2
299746	201902165102	18958804792	25	20190216	13:24:27	1594	1	18	1001	1001	999999999999999	999999999999999	404	1	1	9	10	1	1	0	100	2	80	2	27	12	2	38	50	1	999	0	999	9	30	40	99	99	99	99	9	9	9	9	9	9	1	9	5
299711	201902165132	13969043115	30	20190216	09:06:45	3530	1	18	1001	1001	999999999999999	999999999999999	404	1	1	9	10	1	1	60	80	2	20	1	18	11	1	70	50	1	63	0	999	1	32	40	99	99	99	99	1	2	2	2	1	1	6	2	2
299752	201902165138	13383628862	18	20190216	14:11:22	2285	1	11	1001	1001	999999999999999	999999999999999	404	1	1	9	10	1	1	100	100	2	90	2	23	16	1	38	20	1	999	99	999	9	99	99	99	99	99	99	9	9	9	9	9	9	999	9	3
299713	201902165232	18635280932	31	20190216	09:23:35	2217	6	18	1001	1001	999999999999999	999999999999999	396	1	5	9	24	1	1	50	60	2	30	1	22	15	1	70	50	1	999	99	999	9	99	99	99	99	99	99	9	9	9	9	9	9	999	9	3
299793	201902165275	13102769197	18	20190216	21:40:41	3289	2	18	1002	1002	999999999999999	999999999999999	117	1	1	9	10	1	1	1	90	2	60	2	20	12	1	70	50	1	44	0	999	1	31	40	99	99	99	99	2	1	2	1	2	2	6	2	2
299749	201902165389	3723659856	19	20190216	13:12:25	2286	2	18	1001	1001	999999999999999	999999999999999	385	1	6	9	11	1	1	25	90	2	90	1	30	15	1	52	50	1	999	99	999	9	99	99	99	99	99	99	9	9	9	9	9	9	999	9	3
299763	201902165606	17620156937	14	20190216	14:51:27	3653	1	18	1001	1001	999999999999999	999999999999999	385	1	1	9	10	1	1	50	60	1	0	2	24	16	1	38	60	1	44	0	999	1	32	40	99	99	99	99	1	2	2	2	2	2	3	2	2
299761	201902166423	15329649058	16	20190216	15:00:16	630	1	11	1001	1001	999999999999999	999999999999999	406	1	1	1	10	1	1	98	0	1	0	2	19	15	1	52	19	1	999	0	999	9	30	40	99	99	99	99	9	9	9	9	9	9	0	9	5
299797	201902166789	18518033696	10	20190216	23:18:15	2618	3	18	1001	1001	999999999999999	999999999999999	412	1	6	5	11	1	1	30	90	2	999	1	33	16	3	38	15	1	999	99	999	9	99	99	99	99	99	99	9	9	9	9	9	9	999	9	3
299757	201902166819	18719811314	13	20190216	13:16:31	3314	1	14	1001	1001	999999999999999	999999999999999	411	1	5	9	26	1	1	0	100	2	70	2	32	16	1	52	3	1	67	2	999	1	30	40	99	99	99	99	1	1	2	2	2	2	11	3	2
299780	201902166912	13910699681	10	20190216	18:11:13	3694	1	18	1001	1001	999999999999999	999999999999999	401	1	1	9	10	1	1	35	80	2	50	1	18	13	1	70	50	1	59	1	999	1	32	40	99	99	99	99	1	2	2	2	1	2	7	2	2
299724	201902167086	13357704558	24	20190216	09:52:35	2049	3	18	1001	1001	999999999999999	999999999999999	411	1	1	9	24	1	2	10	90	2	55	2	29	9	1	33	1	1	88	0	999	1	32	40	99	99	99	99	1	2	2	2	2	2	5	3	2
299738	201902167201	15523887028	10	20190216	12:29:53	1982	1	18	1001	1001	999999999999999	999999999999999	383	1	1	9	10	1	1	60	60	1	0	1	26	16	1	40	1	1	27	0	999	1	30	40	99	99	99	99	2	2	2	2	2	2	1	3	2
299743	201902168007	17611343215	18	20190216	12:50:08	2814	1	18	1001	1001	999999999999999	999999999999999	406	1	1	1	10	1	1	50	80	1	0	2	94	15	1	70	10	1	73	0	999	1	32	40	99	99	99	99	1	1	2	2	2	2	6	2	2
299788	201902168551	13508990630	30	20190216	21:02:14	644	1	18	1001	1001	999999999999999	999999999999999	412	1	1	9	10	1	1	50	99	2	999	2	29	16	2	38	50	1	999	99	999	9	99	99	99	99	99	99	9	9	9	9	9	9	999	9	3
299790	201902168567	18862218289	24	20190216	21:30:58	2205	1	18	1001	1001	999999999999999	999999999999999	412	1	1	9	10	1	1	75	55	1	0	2	23	16	1	70	50	1	39	2	999	1	30	40	99	99	99	99	2	1	2	2	2	1	5	3	2
299707	201902169225	18978711962	15	20190216	08:04:33	3590	1	18	1001	1001	999999999999999	999999999999999	396	1	6	9	11	1	2	0	100	2	50	2	22	12	1	52	50	1	89	2	999	3	32	40	99	99	99	99	1	1	2	2	2	1	10	2	2
299764	201902169639	13529774677	38	20190216	15:20:07	2457	1	18	1001	1001	999999999999999	999999999999999	404	1	6	9	11	1	1	999	999	1	0	1	18	12	1	70	50	1	999	99	999	9	99	99	99	99	99	99	9	9	9	9	9	9	999	9	3
299781	201902169781	19982509210	34	20190216	18:30:29	3544	1	99	1001	1001	999999999999999	999999999999999	117	1	6	9	11	1	1	0	100	2	999	2	23	12	1	43	50	1	78	0	999	1	32	40	99	99	99	99	1	1	2	2	2	1	8	2	2
299700	201902169894	13714056092	15	20190216	02:19:08	2512	1	18	1001	1001	999999999999999	999999999999999	335	1	1	9	10	1	1	80	99	2	95	1	21	9	1	42	60	1	60	0	999	1	30	40	99	99	99	99	1	1	2	1	1	1	9	3	2
299886	201902170269	18875289813	40	20190217	16:18:26	2587	2	18	1001	1001	999999999999999	999999999999999	383	1	6	9	16	1	1	2	25	1	0	1	18	11	1	52	50	1	999	99	999	9	99	99	99	99	99	99	9	9	9	9	9	9	999	9	3
299871	201902170672	18851188410	24	20190217	14:15:03	3635	1	18	1001	1001	999999999999999	999999999999999	336	1	6	9	11	1	1	0	90	2	999	1	19	13	1	70	1	1	70	0	999	1	30	40	99	99	99	99	1	1	1	2	2	2	8	3	2
299875	201902171002	51252676905	24	20190217	15:18:46	2139	32	18	1001	1001	999999999999999	999999999999999	406	1	6	6	11	5	2	30	60	2	20	2	47	12	2	20	50	1	60	0	999	1	32	40	99	99	99	99	2	2	2	2	2	1	4	2	2
299905	201902171864	18810603521	10	20190217	21:19:28	2364	1	18	1001	1001	999999999999999	999999999999999	402	1	6	5	16	1	1	50	85	1	0	2	24	17	1	70	1	1	999	99	999	9	99	99	99	99	99	99	9	9	9	9	9	9	999	9	3
299846	201902171910	13146184227	10	20190217	10:43:38	2733	1	14	1001	1001	999999999999999	999999999999999	315	1	1	9	10	1	1	50	75	1	0	1	22	15	1	52	50	1	76	0	999	1	32	40	99	99	99	99	2	1	2	2	2	2	6	3	2
299911	201902172164	13309635608	11	20190217	22:43:58	2139	1	18	1001	1001	999999999999999	999999999999999	383	1	6	5	11	5	2	0	100	6	100	1	22	15	1	52	50	1	86	5	999	5	32	40	99	99	99	99	1	2	2	2	2	1	11	3	2
299847	201902172278	13476719600	21	20190217	10:00:21	3624	2	18	1001	1001	999999999999999	999999999999999	391	1	1	9	10	1	1	0	75	2	75	1	18	10	1	70	50	1	51	1	999	1	31	40	99	99	99	99	1	2	2	2	2	2	6	3	2
299862	201902172334	15696992828	40	20190217	13:12:26	994	1	18	1001	1001	999999999999999	999999999999999	385	1	1	9	10	1	1	999	999	7	999	2	27	9	1	52	50	1	999	99	999	9	99	99	99	99	99	99	9	9	9	9	9	9	999	9	4
299800	201902172425	13530833186	14	20190217	00:05:38	3100	2	18	1001	1001	999999999999999	999999999999999	316	1	6	9	11	1	1	0	90	2	999	1	34	16	1	40	50	1	89	0	999	1	32	40	99	99	99	99	1	2	2	2	2	2	5	2	2
299889	201902173079	13428796292	14	20190217	17:13:57	3330	1	18	1001	1001	999999999999999	999999999999999	383	1	1	9	10	1	1	999	80	1	0	1	37	9	2	52	20	1	12	0	999	1	30	40	99	99	99	99	2	1	2	2	2	2	3	3	2
299869	201902173177	18537794828	14	20190217	12:56:47	3461	1	18	1001	1001	999999999999999	999999999999999	411	1	1	9	10	1	1	50	100	2	75	1	20	12	7	20	70	1	60	0	999	1	31	40	99	99	99	99	2	1	2	2	2	2	6	3	2
299900	201902173381	15580969898	22	20190217	19:13:30	2640	1	18	1001	1001	999999999999999	999999999999999	402	1	1	9	10	1	1	40	75	1	0	1	26	15	1	38	50	1	999	99	999	9	99	99	99	99	99	99	9	9	9	9	9	9	999	9	3
299861	201902173655	18102655970	22	20190217	13:15:50	3053	3	18	1001	1001	18874731237	999999999999999	315	1	6	9	11	1	1	10	100	6	90	2	27	15	1	38	60	1	96	8	999	1	32	40	99	99	99	99	2	2	2	2	2	1	9	3	2
299859	201902173744	15180210159	25	20190217	13:01:38	3516	1	18	1001	1001	999999999999999	999999999999999	406	1	1	1	10	1	1	70	100	1	0	1	19	12	1	70	19	1	72	0	999	1	30	40	99	99	99	99	1	1	2	1	1	2	8	2	2
299833	201902174467	18576446855	11	20190217	09:08:17	3447	1	18	1001	1001	999999999999999	999999999999999	406	1	1	1	10	1	1	50	90	1	0	1	26	15	2	20	60	1	63	0	999	1	31	40	99	99	99	99	1	1	2	2	2	1	7	2	2
299803	201902174579	13792856641	34	20190217	02:31:20	2408	1	18	1001	1001	999999999999999	999999999999999	401	1	6	9	11	9	1	50	80	3	80	2	21	15	1	52	60	1	83	4	999	1	32	40	99	99	99	99	1	1	1	1	9	9	8	9	5
299894	201902174612	13675828152	38	20190217	18:28:45	3550	1	18	1001	1001	999999999999999	999999999999999	360	1	1	9	10	1	1	80	60	2	30	2	23	12	1	35	50	1	67	0	999	4	32	40	99	99	99	99	1	1	1	2	2	2	7	3	2
299835	201902174746	18117501211	33	20190217	08:51:33	3540	1	18	1001	1001	999999999999999	999999999999999	404	1	6	2	11	1	1	55	65	1	0	2	44	18	2	40	18	1	60	0	999	1	32	40	99	99	99	99	2	2	1	2	2	2	3	2	2
299870	201902175604	18655420836	11	20190217	14:12:07	2721	2	18	1001	1001	999999999999999	999999999999999	385	1	1	9	10	1	1	10	95	1	0	1	22	15	2	44	50	1	75	0	999	1	32	40	99	99	99	99	1	2	2	2	2	1	5	2	2
299842	201902175804	17621959306	33	20190217	09:26:22	2343	1	18	1001	1001	999999999999999	999999999999999	315	1	1	9	10	1	1	0	100	2	75	2	23	15	1	38	1	1	40	0	999	1	30	40	99	99	99	99	2	1	2	2	2	2	5	3	2
299805	201902176436	18660253231	30	20190217	03:25:29	3473	1	18	1001	1001	999999999999999	999999999999999	412	1	1	9	10	1	1	1	100	2	80	2	27	9	1	52	50	1	78	0	999	1	32	40	99	99	99	99	1	1	2	2	2	2	7	3	2
299827	201902177330	18673630744	22	20190217	06:52:18	3688	1	18	1001	1001	999999999999999	999999999999999	401	1	6	7	13	1	1	20	30	1	0	2	40	15	1	40	50	1	77	0	999	1	32	40	99	99	99	99	1	2	2	1	2	1	6	2	2
299802	201902177393	15650708882	10	20190217	01:31:04	3486	1	18	1001	1001	999999999999999	999999999999999	316	1	6	9	11	5	1	10	99	1	0	1	24	16	1	70	5	1	66	1	999	1	32	40	99	99	99	99	1	1	2	1	2	1	9	3	2
299901	201902179237	18855490863	11	20190217	20:18:50	3147	1	18	1001	1001	999999999999999	999999999999999	383	1	1	9	10	1	1	999	80	2	80	1	22	16	1	70	50	1	43	0	999	1	30	40	99	99	99	99	1	1	2	2	2	2	5	3	2
299848	201902179323	13756897115	23	20190217	10:00:56	3776	2	18	1001	1001	999999999999999	999999999999999	411	1	2	9	24	1	1	999	99	6	80	1	18	10	1	70	10	1	82	999	999	1	32	40	99	99	99	99	2	1	2	1	1	1	10	3	2
299801	201902179482	13331660115	23	20190217	00:58:23	3825	1	11	1001	1001	999999999999999	999999999999999	401	1	1	9	10	1	1	80	50	1	0	2	30	14	1	38	13	1	33	0	999	2	31	40	99	99	99	99	1	1	2	2	1	2	5	2	2
299885	201902179925	13398608535	18	20190217	16:17:01	3638	2	18	1001	1001	999999999999999	999999999999999	360	1	1	9	10	1	1	10	100	1	0	1	24	16	1	52	50	1	61	0	999	1	30	40	99	99	99	99	1	1	2	2	1	2	8	3	2
299958	201902180138	15653480393	30	20190218	12:36:22	3279	1	18	1001	1001	999999999999999	999999999999999	403	1	6	9	11	5	2	999	30	2	70	1	18	12	1	70	3	1	48	2	999	1	32	40	99	99	99	99	2	2	2	2	1	1	4	2	2
299929	201902180150	15225509336	19	20190218	06:36:17	2194	1	18	1001	1001	999999999999999	999999999999999	402	1	1	9	10	1	1	60	90	2	40	2	46	9	2	44	50	1	85	0	999	1	32	40	99	99	99	99	1	1	1	2	2	2	7	2	2
299964	201902180527	13194235897	26	20190218	13:51:22	2748	1	18	1001	1001	999999999999999	999999999999999	406	1	5	5	10	1	1	50	60	1	0	1	22	16	8	70	20	1	31	0	999	1	31	40	99	99	99	99	2	2	2	2	2	2	2	2	2
299983	201902180692	18036618210	10	20190218	16:04:29	3443	1	18	1001	1001	999999999999999	999999999999999	315	1	5	9	26	1	1	80	90	1	0	2	27	18	2	38	1	1	67	0	999	1	30	40	99	99	99	99	1	2	2	2	2	1	4	3	2
299948	201902180905	18500161012	10	20190218	09:39:11	3690	1	18	1001	1001	999999999999999	999999999999999	403	1	6	5	24	1	1	35	80	2	50	1	28	15	1	38	3	1	82	0	999	1	30	40	99	99	99	99	1	1	2	2	2	1	8	2	2
299945	201902181618	15955455281	11	20190218	09:03:53	3651	1	10	1001	1001	999999999999999	999999999999999	389	1	1	9	10	1	1	75	80	1	0	1	51	12	2	60	50	1	6	0	999	1	30	40	99	99	99	99	1	2	2	1	2	1	5	2	2
299941	201902181845	13253133508	18	20190218	08:23:59	4507	1	18	1001	1001	999999999999999	999999999999999	391	1	1	9	10	1	1	999	100	4	50	2	19	11	1	70	50	1	64	0	999	1	30	40	99	99	99	99	1	2	2	1	2	2	8	3	2
300006	201902181924	15011105921	10	20190218	22:32:18	4654	2	18	1001	1001	999999999999999	999999999999999	390	1	1	1	10	1	1	35	75	6	0	1	18	12	1	70	50	1	61	3	999	1	30	40	99	99	99	99	1	1	2	2	2	2	11	3	2
299990	201902181933	13233729419	19	20190218	18:11:55	3045	1	18	1001	1001	999999999999999	999999999999999	336	1	1	9	10	1	1	90	50	1	0	1	22	16	1	70	50	1	30	0	999	1	30	40	99	99	99	99	2	2	2	2	2	1	2	3	2
299932	201902182200	18108238199	38	20190218	07:20:49	3332	1	18	1001	1001	999999999999999	999999999999999	396	1	1	9	10	1	1	25	75	2	50	2	24	15	1	52	1	1	63	0	999	1	32	40	99	99	99	99	1	2	2	2	2	1	6	2	2
299943	201902182515	13121260090	10	20190218	10:01:35	2108	1	18	1001	1001	999999999999999	999999999999999	406	1	6	6	12	5	3	60	60	1	0	1	33	16	2	38	10	1	40	0	999	1	30	40	99	99	99	99	2	1	2	2	2	2	3	2	2
299970	201902182799	15313809906	26	20190218	13:58:55	3578	1	18	1001	1001	999999999999999	999999999999999	387	1	1	9	10	1	1	35	100	2	75	2	23	10	1	52	50	1	76	0	999	1	32	40	99	99	99	99	9	9	9	9	9	9	2	9	5
299989	201902183715	15516663030	19	20190218	17:44:06	3837	1	18	1001	1001	999999999999999	999999999999999	385	1	1	9	10	1	1	0	100	2	90	2	26	16	1	38	50	1	97	1	999	1	32	40	99	99	99	99	1	1	2	1	2	2	9	2	2
299922	201902183733	18374502305	24	20190218	04:04:24	1238	1	18	1001	1001	999999999999999	999999999999999	396	1	1	9	10	1	1	999	80	2	90	2	21	12	1	38	3	1	999	99	999	9	99	99	99	99	99	99	9	9	9	9	9	9	999	9	3
299991	201902183758	17615187331	26	20190218	18:41:45	802	1	18	1001	1001	999999999999999	999999999999999	404	1	1	9	10	1	1	100	50	2	50	2	28	9	1	43	50	1	999	99	999	9	99	99	99	99	99	99	9	9	9	9	9	9	999	9	4
299967	201902183832	17746960286	19	20190218	13:50:06	1303	1	18	1001	1001	999999999999999	999999999999999	391	1	1	9	10	1	1	999	999	1	0	1	24	15	1	52	4	1	999	99	999	9	99	99	99	99	99	99	9	9	9	9	9	9	999	9	3
299966	201902184307	18201785397	33	20190218	13:41:46	678	1	18	1001	1001	999999999999999	999999999999999	411	1	1	9	10	1	1	50	40	1	0	1	21	15	1	70	50	1	34	1	999	1	30	40	99	99	99	99	2	1	1	2	2	1	6	3	2
299997	201902184825	18922511980	14	20190218	19:27:01	3553	1	18	1001	1001	999999999999999	999999999999999	315	1	1	9	10	1	1	50	90	2	75	1	28	12	2	52	8	1	82	0	999	1	32	40	99	99	99	99	1	1	2	2	2	2	7	2	2
300009	201902185127	13531021695	14	20190218	23:05:47	2903	1	18	1001	1001	999999999999999	999999999999999	336	1	1	9	10	1	1	50	50	1	0	2	24	16	1	38	50	1	33	0	999	1	31	40	99	99	99	99	1	2	2	2	2	2	3	3	2
299975	201902185278	13562503618	30	20190218	14:17:32	3645	1	18	1001	1001	999999999999999	999999999999999	391	1	1	9	10	1	1	80	90	2	25	1	51	12	2	21	99	1	55	0	999	1	31	40	99	99	99	99	1	1	2	2	1	2	6	3	2
299924	201902185540	15187971717	38	20190218	04:26:37	3629	1	18	1001	1001	999999999999999	999999999999999	396	1	3	9	24	1	1	10	0	1	0	1	29	99	2	40	50	1	45	0	999	1	30	40	99	99	99	99	1	2	2	2	2	2	2	2	2
299995	201902185567	16601372558	19	20190218	19:33:45	3559	1	18	1001	1001	999999999999999	999999999999999	404	1	1	9	10	1	1	0	70	2	75	2	19	14	1	70	50	1	49	1	999	1	30	40	99	99	99	99	1	1	1	2	2	1	9	2	2
299946	201902186236	15010439562	10	20190218	10:12:51	3623	1	13	1001	1001	999999999999999	999999999999999	387	1	5	6	24	1	1	30	60	1	0	1	36	16	2	52	11	1	55	0	999	1	32	40	99	99	99	99	2	2	2	2	2	2	3	3	2
299986	201902186674	15959000193	12	20190218	16:04:25	3681	1	18	1001	1001	999999999999999	999999999999999	385	1	6	9	11	1	1	8	99	1	0	2	29	12	1	42	50	1	88	0	999	1	32	40	99	99	99	99	2	2	2	2	2	2	4	2	2
299985	201902186791	15898310896	26	20190218	16:50:47	2423	1	18	1001	1001	999999999999999	999999999999999	404	1	6	5	23	1	1	999	100	2	999	1	22	16	1	52	50	1	999	99	999	9	99	99	99	99	99	99	9	9	9	9	9	9	999	9	3
299926	201902187103	17733846250	10	20190218	05:27:41	3031	1	14	1001	1001	999999999999999	999999999999999	383	1	1	9	10	1	1	999	80	2	80	1	28	17	2	39	4	1	84	15	999	1	30	40	99	99	99	99	1	1	2	1	2	1	9	3	2
299999	201902187479	17376397861	15	20190218	20:13:31	3640	1	18	1001	1001	999999999999999	999999999999999	385	1	1	9	10	1	1	80	95	2	90	1	18	11	1	70	50	1	53	0	999	1	30	40	99	99	99	99	1	2	2	2	2	1	5	2	2
299959	201902188139	821058961605	23	20190218	12:55:03	2079	9	18	1001	1001	999999999999999	999999999999999	391	1	1	1	10	1	1	999	100	2	999	1	27	12	1	21	1	1	999	99	999	9	99	99	99	99	99	99	9	9	9	9	9	9	999	9	3
299951	201902188155	15070008131	25	20190218	11:13:30	3503	1	18	1001	1001	999999999999999	999999999999999	406	1	1	1	10	1	1	999	100	2	85	1	28	15	1	38	4	1	91	0	999	1	32	40	99	99	99	99	1	1	2	2	1	2	7	2	2
299950	201902188591	18206705013	38	20190218	10:26:21	2563	3	18	1001	1001	999999999999999	999999999999999	389	1	6	9	11	1	1	20	80	1	0	1	21	16	1	70	50	1	999	99	999	9	99	99	99	99	99	99	9	9	9	9	9	9	999	9	3
299982	201902188802	15522057917	35	20190218	16:19:03	3203	1	18	1001	1001	999999999999999	999999999999999	390	1	5	9	26	1	1	60	70	1	0	1	25	19	1	70	8	1	65	0	999	1	32	40	99	99	99	99	1	1	2	2	2	2	5	3	2
300007	201902188841	15905704100	39	20190218	21:36:58	3734	1	18	1001	1001	999999999999999	999999999999999	315	1	1	9	10	1	1	45	90	2	50	2	19	11	1	70	50	1	90	2	999	1	32	40	99	99	99	99	1	1	2	2	2	1	9	2	2
300011	201902189584	15980731736	12	20190218	23:29:30	3552	1	18	1001	1001	999999999999999	999999999999999	315	1	1	9	10	1	1	35	73	6	0	1	20	14	1	70	50	1	63	1	999	1	32	40	99	99	99	99	1	1	2	2	2	1	12	3	2
299940	201902189593	18070300856	25	20190218	08:24:51	3441	1	18	1001	1001	999999999999999	999999999999999	411	1	1	9	10	1	1	0	95	2	80	1	18	11	1	43	50	1	77	3	999	1	32	40	99	99	99	99	1	1	2	1	2	1	10	3	2
299939	201902189720	18510633003	10	20190218	09:00:09	3160	1	18	1001	1001	999999999999999	999999999999999	387	1	5	9	24	1	1	0	60	2	75	1	26	18	1	38	1	1	73	1	999	1	32	40	99	99	99	99	2	2	2	1	2	1	7	3	2
299935	201902189982	13294061793	39	20190218	08:44:03	1791	1	18	1001	1001	999999999999999	999999999999999	406	1	6	6	11	1	1	0	90	2	80	2	25	16	1	38	70	1	999	0	999	9	30	40	99	99	99	99	9	9	9	9	9	9	1	9	5
300043	201902190208	17786030752	21	20190219	12:33:48	2785	9	18	1001	1001	999999999999999	999999999999999	387	1	6	2	12	5	2	0	80	2	90	1	46	16	6	52	50	1	64	0	999	1	32	40	99	99	99	99	2	2	2	2	2	2	4	3	2
300073	201902190303	13471153764	15	20190219	23:06:02	3700	1	18	1001	1001	999999999999999	999999999999999	332	1	1	9	10	1	1	60	100	2	50	1	29	16	1	38	50	1	25	0	999	1	31	40	99	99	99	99	1	1	2	2	2	2	4	3	2
300030	201902190317	15666375880	10	20190219	08:56:51	3661	1	18	1001	1001	999999999999999	999999999999999	387	1	6	9	11	1	1	999	100	2	80	2	27	12	4	42	4	1	98	1	999	1	32	40	99	99	99	99	1	1	2	2	1	2	8	2	2
300026	201902191017	15069698339	30	20190219	08:16:06	2863	1	18	1001	1001	999999999999999	999999999999999	408	1	1	9	10	1	1	999	999	2	999	2	21	10	1	44	50	1	999	99	999	9	30	40	99	99	99	99	9	9	9	9	9	9	0	9	5
300032	201902191305	13911506233	10	20190219	09:50:30	3238	1	18	1001	1001	999999999999999	999999999999999	335	1	1	9	10	1	6	20	100	2	80	1	42	15	2	44	19	1	90	1	999	1	32	40	99	99	99	99	1	1	2	2	2	2	8	3	2
300033	201902193578	15516360613	19	20190219	08:52:00	3437	1	18	1001	1001	999999999999999	999999999999999	403	1	6	5	12	5	2	99	85	2	85	1	18	12	1	70	50	1	58	3	999	1	32	40	99	99	99	99	1	1	2	2	2	2	7	2	2
300019	201902193618	13661395058	10	20190219	04:19:58	2514	1	18	1001	1001	999999999999999	999999999999999	385	1	1	9	10	1	1	60	90	1	0	1	44	16	2	38	50	1	999	99	999	9	99	99	99	99	99	99	9	9	9	9	9	9	999	9	3
300016	201902193817	15512891333	18	20190219	03:41:27	5480	1	18	1001	1001	999999999999999	999999999999999	404	1	1	9	10	1	1	5	75	7	80	1	21	10	1	52	50	1	64	4	999	1	32	40	99	99	99	99	2	2	2	2	1	2	9	2	2
300020	201902194112	18311001625	10	20190219	03:30:15	2590	1	18	1001	1001	999999999999999	999999999999999	385	1	1	9	10	1	1	0	50	2	50	2	30	15	1	44	50	1	999	99	999	9	99	99	99	99	99	99	9	9	9	9	9	9	999	9	3
300063	201902194199	15801282080	10	20190219	16:34:42	6370	1	18	1001	1001	999999999999999	999999999999999	332	1	6	5	11	1	1	10	100	5	70	1	33	16	1	40	12	1	70	0	999	1	30	40	99	99	99	99	1	1	2	2	2	1	11	2	2
300058	201902194477	18647153796	27	20190219	16:02:02	1919	1	18	1001	1001	999999999999999	999999999999999	411	1	1	9	10	1	1	0	80	6	60	2	50	15	2	52	50	1	999	4	999	9	30	40	99	99	99	99	9	9	9	9	9	9	2	9	5
300066	201902194557	17761410810	34	20190219	19:00:18	3056	1	18	1001	1001	999999999999999	999999999999999	391	1	1	9	10	1	1	30	85	2	20	2	23	16	1	38	4	1	81	0	999	1	32	40	99	99	99	99	2	2	2	2	2	1	5	3	2
300074	201902194607	13295298818	24	20190219	23:10:28	3669	1	18	1001	1001	999999999999999	999999999999999	411	1	1	9	10	1	1	10	100	2	50	2	33	12	4	52	50	1	75	4	999	1	31	40	99	99	99	99	1	1	2	2	1	1	10	3	2
300069	201902195287	13384302405	23	20190219	21:30:24	3478	1	18	1001	1001	999999999999999	999999999999999	406	1	1	1	10	1	1	90	75	2	80	1	21	13	1	70	20	1	88	0	999	1	32	40	99	99	99	99	1	1	2	2	2	1	7	2	2
300057	201902195310	18706246961	22	20190219	16:07:55	2337	1	18	1001	1001	999999999999999	999999999999999	406	1	6	5	11	1	1	100	0	1	0	1	25	15	3	52	60	1	90	0	999	1	32	40	99	99	99	99	1	1	2	2	1	2	5	2	2
300021	201902195477	15058080830	39	20190219	04:22:08	2727	1	18	1001	1001	999999999999999	999999999999999	315	1	1	9	10	1	1	40	80	2	20	2	26	12	1	38	20	1	63	1	999	1	30	40	99	99	99	99	1	1	2	2	2	1	9	3	2
300049	201902196473	17388902461	22	20190219	14:25:17	4063	1	18	1001	1001	999999999999999	999999999999999	388	1	1	9	10	1	1	999	70	1	0	1	22	15	1	70	50	1	33	0	999	1	30	40	99	99	99	99	2	1	2	2	1	2	4	3	2
300048	201902196794	17659063162	12	20190219	14:16:00	2245	2	18	1001	1001	999999999999999	999999999999999	408	1	1	9	10	1	1	999	80	2	999	1	20	13	1	21	17	1	55	0	999	1	30	40	99	99	99	99	1	1	2	2	2	1	7	3	2
300025	201902196976	15700080575	22	20190219	08:08:19	3762	1	18	1001	1001	999999999999999	999999999999999	335	1	5	6	25	1	1	30	99	3	1	1	26	16	1	38	2	1	70	0	999	1	32	40	99	99	99	99	1	2	2	2	2	2	5	3	2
300037	201902197106	15968769439	39	20190219	10:12:58	4195	1	18	1001	1001	999999999999999	999999999999999	403	1	1	1	10	1	1	0	97	4	90	2	29	9	4	52	7	1	57	0	999	1	30	40	99	99	99	99	2	1	2	2	2	2	6	2	2
300038	201902197254	13501269060	10	20190219	11:20:16	3315	1	18	1001	1001	999999999999999	999999999999999	335	1	6	9	25	1	1	50	100	2	80	1	54	16	5	60	20	1	74	0	999	1	32	40	99	99	99	99	1	1	1	2	2	2	8	3	2
300039	201902197881	17600299318	10	20190219	11:29:44	4912	1	18	1001	1001	999999999999999	999999999999999	388	1	6	9	11	5	2	20	80	7	90	2	25	16	1	38	2	1	64	1	999	1	32	40	99	99	99	99	2	1	2	2	2	2	10	3	2
300068	201902198139	15953402121	30	20190219	19:03:00	3799	2	18	1001	1001	999999999999999	999999999999999	411	1	6	9	25	1	1	10	100	2	90	2	27	12	1	52	50	1	95	1	999	1	32	40	99	99	99	99	1	1	2	2	2	1	9	3	2
300031	201902198568	18753617590	30	20190219	09:29:56	4779	1	18	1001	1001	999999999999999	999999999999999	408	1	6	9	11	5	1	0	100	5	100	2	20	9	1	44	50	1	76	100	999	1	32	40	99	99	99	99	1	2	1	2	1	1	12	3	2
300075	201902199078	15132965588	18	20190219	23:49:58	2372	1	18	1001	1001	999999999999999	999999999999999	391	1	1	9	10	1	1	80	90	1	0	1	44	11	2	35	50	1	999	99	999	9	99	99	99	99	99	99	9	9	9	9	9	9	999	9	3
300012	201902199186	18639512568	19	20190219	00:51:01	3262	1	18	1001	1001	999999999999999	999999999999999	336	1	1	9	10	1	1	40	90	2	80	2	24	16	1	52	50	1	83	0	999	1	32	40	99	99	99	99	1	2	2	2	2	2	5	3	2
300023	201902199232	17682453592	39	20190219	06:19:11	1590	1	18	1001	1001	999999999999999	999999999999999	336	1	1	9	10	1	1	0	50	2	50	2	21	9	1	35	1	1	55	0	999	1	32	40	99	99	99	99	2	2	2	2	2	2	4	2	2
300040	201902199816	18795848998	24	20190219	11:59:34	5259	1	18	1001	1001	999999999999999	999999999999999	408	1	1	9	10	1	1	0	100	4	80	1	28	16	7	52	2	1	88	0	999	1	32	40	99	99	99	99	1	1	2	2	2	2	10	3	2
300055	201902199913	13485676988	11	20190219	14:19:56	2898	1	18	1001	1001	999999999999999	999999999999999	387	1	1	9	10	1	1	0	80	3	90	2	31	15	1	52	50	1	85	2	999	1	32	40	99	99	99	99	1	1	1	2	2	1	10	2	2
300152	201902200002	13022273681	35	20190220	22:08:14	2401	1	18	1001	1001	999999999999999	999999999999999	403	1	6	9	11	1	1	100	90	2	80	1	23	12	1	52	50	1	96	0	999	1	32	40	99	99	99	99	1	2	1	1	1	1	8	2	2
300120	201902200018	15565455555	10	20190220	13:39:12	3590	1	18	1001	1001	999999999999999	999999999999999	408	1	1	9	10	1	1	999	90	2	40	1	33	15	1	52	14	1	100	0	999	1	32	40	99	99	99	99	1	1	2	2	2	2	6	3	2
300077	201902200241	18711935378	14	20190220	00:48:06	3637	1	18	1001	1001	999999999999999	999999999999999	332	1	1	9	10	1	1	0	55	2	50	2	18	9	1	42	60	1	65	0	999	1	32	40	99	99	99	99	1	2	1	2	2	2	6	2	2
300142	201902201051	18283169202	34	20190220	17:59:30	1253	1	18	1001	1001	999999999999999	999999999999999	388	1	6	9	25	1	1	35	60	1	0	2	18	7	1	70	50	1	999	99	999	9	99	99	99	99	99	99	9	9	9	9	9	9	999	9	4
300143	201902201633	13381030978	10	20190220	18:22:03	2999	1	18	1001	1001	999999999999999	999999999999999	388	1	6	9	11	1	1	5	95	2	50	2	30	16	2	52	7	1	84	0	999	1	32	40	99	99	99	99	1	2	2	2	2	2	5	3	2
300106	201902202203	18997181989	29	20190220	10:26:17	3601	1	12	1001	1001	999999999999999	999999999999999	410	1	6	9	11	5	4	1	100	2	60	2	28	16	1	38	50	1	85	2	999	1	32	40	99	99	99	99	1	1	2	2	2	1	9	3	2
300149	201902202644	13701031947	10	20190220	19:30:40	2234	2	18	1001	1001	999999999999999	999999999999999	403	1	1	9	10	1	1	0	85	1	0	1	29	15	2	38	50	1	71	0	999	1	32	40	99	99	99	99	2	2	2	2	1	2	4	2	2
300089	201902202741	13077754050	15	20190220	08:36:17	2286	1	18	1001	1001	999999999999999	999999999999999	408	1	5	9	24	1	1	60	70	2	30	2	20	9	1	52	60	1	40	0	999	1	30	40	99	99	99	99	2	2	2	2	1	1	4	2	2
300159	201902203613	18330420062	18	20190220	23:50:16	3588	1	18	1001	1001	999999999999999	999999999999999	403	1	1	1	10	1	1	30	999	2	50	1	23	15	1	32	50	1	68	1	999	1	32	40	99	99	99	99	1	2	2	1	1	2	7	2	2
300109	201902203740	17789157049	32	20190220	12:17:38	3483	1	18	1001	1001	999999999999999	999999999999999	408	1	1	9	10	1	1	999	85	1	0	2	24	11	1	52	50	1	62	0	999	1	30	40	99	99	99	99	1	2	2	2	2	2	3	3	2
300147	201902203931	13012221711	35	20190220	19:52:35	2288	1	18	1001	1001	999999999999999	999999999999999	387	1	1	9	10	1	1	999	90	1	0	1	35	16	4	38	99	1	999	0	999	9	30	40	99	99	99	99	9	9	9	9	9	9	0	9	5
300103	201902203989	18856085365	11	20190220	10:18:12	2547	2	18	1001	1001	999999999999999	999999999999999	408	1	2	9	26	1	1	90	20	1	0	1	29	19	1	39	50	1	999	99	999	9	30	40	99	99	99	99	9	9	9	9	9	9	0	9	5
300141	201902205217	19956863231	11	20190220	17:35:44	3649	1	18	1001	1001	999999999999999	999999999999999	387	1	1	9	10	1	1	10	99	2	80	1	29	16	1	40	50	1	75	1	999	1	32	40	99	99	99	99	1	1	2	2	2	1	9	2	2
300124	201902205453	13676332931	30	20190220	14:11:16	3479	1	18	1001	1001	999999999999999	999999999999999	412	1	6	5	24	1	1	60	90	1	0	1	18	12	1	70	50	1	47	0	999	1	31	40	99	99	99	99	1	1	2	1	1	1	7	3	2
300085	201902205493	18810908023	10	20190220	07:20:11	3513	2	11	1001	1001	999999999999999	999999999999999	406	1	6	6	11	5	1	65	999	1	0	1	27	18	1	70	4	1	21	1	999	1	30	40	99	99	99	99	2	1	2	1	2	2	4	2	2
300118	201902206376	19903889670	19	20190220	11:54:46	3629	1	18	1001	1001	999999999999999	999999999999999	377	1	6	5	24	1	1	4	100	2	95	2	28	19	1	20	2	1	90	10	999	1	32	40	99	99	99	99	1	1	2	1	2	2	9	2	2
300080	201902206395	15828616538	34	20190220	03:40:34	3582	1	18	1001	1001	999999999999999	999999999999999	411	1	1	9	10	1	1	10	90	2	50	2	22	15	1	70	50	1	61	1	999	1	30	40	99	99	99	99	1	1	2	2	2	1	9	3	2
300079	201902206727	18043415767	26	20190220	03:33:20	2990	1	99	1001	1001	999999999999999	999999999999999	391	1	1	9	10	1	1	999	65	1	0	2	24	15	1	38	60	1	999	99	999	9	99	99	99	99	99	99	9	9	9	9	9	9	999	9	3
300094	201902207122	15062180296	24	20190220	09:07:53	3220	1	18	1001	1001	999999999999999	999999999999999	401	1	2	9	10	1	1	0	99	2	50	1	24	16	1	70	60	1	76	0	999	1	32	40	99	99	99	99	1	2	2	1	2	2	6	2	2
300136	201902207245	15276850306	37	20190220	17:11:25	3643	2	18	1001	1001	999999999999999	999999999999999	389	1	6	9	11	5	2	20	90	2	65	1	26	16	1	52	50	1	61	0	999	1	30	40	99	99	99	99	1	1	2	2	2	2	7	2	2
300110	201902207865	13702457506	14	20190220	12:31:33	3650	1	18	1001	1001	999999999999999	999999999999999	412	1	6	5	12	1	1	10	69	2	25	2	18	11	1	70	50	1	66	99	999	1	30	40	99	99	99	99	1	1	2	2	1	2	8	3	2
300137	201902207891	15623355338	21	20190220	17:23:49	675	1	14	1001	1001	999999999999999	999999999999999	387	1	9	9	99	9	9	999	999	9	999	2	26	15	1	88	50	1	999	99	999	9	99	99	99	99	99	99	9	9	9	9	9	9	999	9	4
300130	201902207936	18503139668	18	20190220	15:22:10	2964	1	18	1001	1001	999999999999999	999999999999999	408	1	1	9	10	1	1	999	90	2	50	2	31	16	2	38	4	1	92	1	999	1	32	40	99	99	99	99	1	1	2	2	2	2	7	3	2
300082	201902207940	18864493879	19	20190220	05:40:51	2626	1	88	1001	1001	999999999999999	999999999999999	391	1	1	9	10	1	1	90	90	1	0	2	22	11	1	70	50	1	44	0	999	1	31	40	99	99	99	99	2	2	2	1	1	2	3	3	2
300099	201902208476	15628921835	30	20190220	09:42:22	2961	1	18	1001	1001	999999999999999	999999999999999	412	1	1	9	10	1	1	1	95	2	90	2	27	17	1	70	6	1	79	0	999	1	32	40	99	99	99	99	1	2	2	2	1	1	7	2	2
300129	201902208500	18322486663	27	20190220	13:48:31	2841	3	18	1001	1001	999999999999999	999999999999999	377	1	6	9	11	1	1	0	100	2	100	2	26	15	1	38	50	1	98	3	999	1	32	40	99	99	99	99	2	2	2	2	2	1	6	2	2
300078	201902208906	13850273772	38	20190220	02:11:42	3670	1	18	1001	1001	999999999999999	999999999999999	332	1	1	9	10	1	1	100	75	1	0	2	21	14	1	70	60	1	58	0	999	1	31	40	99	99	99	99	1	2	2	2	2	2	3	3	2
300132	201902209220	13211004023	14	20190220	15:22:41	2163	2	18	1001	1001	999999999999999	999999999999999	412	1	1	9	10	1	1	10	80	2	50	2	21	13	1	70	50	1	92	0	999	4	32	40	99	99	99	99	1	2	2	2	2	2	6	2	2
300119	201902209939	17613732788	10	20190220	13:27:22	3260	1	18	1001	1001	999999999999999	999999999999999	410	1	1	9	10	1	1	100	100	2	10	2	31	10	2	44	50	1	83	0	999	1	32	40	99	99	99	99	1	2	2	2	2	1	5	3	2
300156	201902210207	13841907327	26	20190221	00:08:10	750	1	18	1001	1001	999999999999999	999999999999999	388	1	1	9	10	1	1	999	60	1	0	1	21	14	1	70	50	1	999	99	999	9	99	99	99	99	99	99	9	9	9	9	9	9	999	9	3
300227	201902210253	13049791226	14	20190221	15:11:10	1830	1	18	1001	1001	999999999999999	999999999999999	117	1	1	9	10	1	1	999	999	2	999	2	19	8	1	52	3	1	999	99	999	9	99	99	99	99	99	99	9	9	9	9	9	9	999	9	3
300171	201902210371	15309082852	34	20190221	08:33:00	3823	1	18	1001	1001	999999999999999	999999999999999	401	1	1	9	10	1	1	1	90	2	50	1	18	12	1	70	50	1	43	0	999	1	31	40	99	99	99	99	1	1	2	2	1	1	8	2	2
300199	201902210567	13237197929	30	20190221	12:24:32	605	1	18	1001	1001	999999999999999	999999999999999	383	1	1	9	10	1	1	10	85	1	0	1	22	16	1	70	50	1	999	99	999	9	99	99	99	99	99	99	9	9	9	9	9	9	999	9	4
300226	201902210595	18656491025	11	20190221	15:24:08	3553	1	11	1001	1001	999999999999999	999999999999999	383	1	1	9	10	1	1	50	85	2	80	1	28	15	2	35	8	1	74	0	999	1	32	40	99	99	99	99	2	2	2	2	2	2	4	3	2
300214	201902211795	13721410135	19	20190221	14:10:35	3662	1	18	1001	1001	999999999999999	999999999999999	412	1	1	9	10	1	1	0	80	2	70	2	25	6	1	52	50	1	69	0	999	1	30	40	99	99	99	99	1	2	2	1	2	2	6	3	2
300182	201902211850	13693174210	10	20190221	09:26:39	3509	1	18	1001	1001	999999999999999	999999999999999	402	1	6	9	16	1	1	80	70	1	0	2	28	12	1	52	60	1	68	0	999	1	32	40	99	99	99	99	1	1	2	2	2	2	5	1	2
300245	201902211882	17688924270	14	20190221	20:52:51	3584	1	18	1001	1001	999999999999999	999999999999999	409	1	1	9	10	1	1	10	85	2	60	1	28	16	1	38	3	1	89	3	999	1	32	40	99	99	99	99	1	1	2	2	2	1	9	2	2
300231	201902212341	13631399596	14	20190221	16:45:12	1569	1	18	1001	1001	999999999999999	999999999999999	410	1	2	9	10	1	1	15	75	1	75	2	27	15	1	43	3	1	999	99	999	9	99	99	99	99	99	99	9	9	9	9	9	9	999	9	4
300193	201902212584	13812616655	24	20190221	11:36:14	2755	1	18	1001	1001	999999999999999	999999999999999	396	1	1	9	10	1	1	30	100	2	10	1	19	12	1	70	50	1	100	0	999	1	32	40	99	99	99	99	2	1	2	2	2	2	6	2	2
300183	201902212907	15810206111	10	20190221	09:31:42	3613	1	18	1001	1001	999999999999999	999999999999999	396	1	6	9	24	1	1	0	100	2	50	1	40	18	2	38	14	1	86	0	999	1	32	40	99	99	99	99	1	2	2	2	2	1	6	2	2
300248	201902213210	13548361729	34	20190221	23:49:44	3223	1	18	1001	1001	999999999999999	999999999999999	409	1	1	9	10	1	1	15	80	2	30	2	25	9	1	38	60	1	50	1	999	1	30	40	99	99	99	99	1	1	1	2	2	1	10	2	2
300163	201902213485	15522161516	35	20190221	02:57:42	3648	1	11	1001	1001	999999999999999	999999999999999	389	1	1	9	10	1	1	60	50	2	50	2	22	14	1	38	50	1	66	1	999	1	30	40	99	99	99	99	1	1	2	2	1	1	8	2	2
300244	201902213519	16607213798	32	20190221	21:39:27	4085	1	18	1001	1001	999999999999999	999999999999999	410	1	6	5	11	1	1	20	90	5	80	2	19	12	1	52	60	1	84	13	999	3	32	40	99	99	99	99	1	1	2	1	2	1	14	3	2
300221	201902213872	15565327218	19	20190221	14:51:51	3633	1	18	1001	1001	999999999999999	999999999999999	402	1	3	9	10	1	1	50	90	1	0	1	25	12	1	52	60	1	32	0	999	1	30	40	99	99	99	99	1	1	2	2	2	1	6	2	2
300162	201902213907	13543035933	14	20190221	02:33:29	3861	1	18	1001	1001	999999999999999	999999999999999	388	1	1	9	10	1	1	0	999	2	100	1	18	10	1	70	2	1	78	2	999	1	32	40	99	99	99	99	1	1	2	1	2	2	8	3	2
300228	201902214045	15699051406	37	20190221	16:08:45	902	1	18	1001	1001	999999999999999	999999999999999	410	1	6	9	12	5	2	30	80	2	50	1	19	11	1	70	50	1	999	99	999	9	99	99	99	99	99	99	9	9	9	9	9	9	999	9	4
300222	201902214264	18115191580	24	20190221	15:01:36	3179	1	18	1001	1001	999999999999999	999999999999999	396	1	1	9	10	1	1	55	55	2	35	2	24	15	1	52	5	1	55	0	999	1	30	40	99	99	99	99	1	2	2	2	2	1	5	2	2
300212	201902214932	15706887148	39	20190221	13:04:50	2710	2	18	1001	1001	999999999999999	999999999999999	117	1	1	9	10	1	1	25	90	2	45	2	23	16	1	38	50	1	78	0	999	1	32	40	99	99	99	99	1	2	2	2	2	2	5	2	2
300210	201902214967	18059162564	12	20190221	13:25:39	2525	3	18	1001	1001	999999999999999	999999999999999	402	1	6	9	25	1	1	80	80	1	0	1	26	15	1	52	50	1	44	0	999	1	30	40	99	99	99	99	1	1	2	2	2	1	5	2	2
300180	201902215139	15391125327	27	20190221	09:24:43	3341	1	18	1001	1001	999999999999999	999999999999999	412	1	1	9	10	1	1	50	75	2	45	2	21	11	1	70	50	1	61	0	999	2	32	40	99	99	99	99	1	1	2	2	2	2	7	3	2
300169	201902215151	13766361880	25	20190221	08:09:41	1941	1	18	1001	1001	999999999999999	999999999999999	396	1	5	9	26	1	1	85	60	2	0	2	28	12	4	38	50	1	999	0	999	9	30	40	99	99	99	99	9	9	9	9	9	9	1	9	5
300187	201902216008	17838695505	19	20190221	10:25:41	3049	1	18	1001	1001	999999999999999	999999999999999	383	1	1	9	10	1	1	0	80	2	999	2	21	15	1	70	50	1	47	0	999	1	30	40	99	99	99	99	1	1	2	1	1	2	8	3	2
300238	201902216303	13233169905	30	20190221	19:17:50	2755	1	18	1001	1001	999999999999999	999999999999999	410	1	6	5	11	5	2	10	100	2	90	2	21	16	1	38	60	1	78	3	999	1	32	40	99	99	99	99	2	2	2	2	2	2	5	3	2
300165	201902216373	17873518961	22	20190221	04:19:05	3620	1	18	1001	1001	999999999999999	999999999999999	387	1	6	7	12	1	1	20	80	2	50	2	27	7	1	52	50	1	89	0	999	1	32	40	99	99	99	99	2	2	2	2	2	2	4	1	2
300225	201902216559	18800262283	33	20190221	14:17:53	3580	1	18	1001	1001	999999999999999	999999999999999	404	1	1	9	10	1	1	10	60	1	0	2	19	12	1	70	1	1	48	0	999	1	31	40	99	99	99	99	1	2	2	2	1	2	4	2	2
300247	201902216702	18208415474	16	20190221	22:21:33	2295	1	18	1001	1001	999999999999999	999999999999999	408	1	1	9	10	1	1	80	999	1	0	2	22	12	1	21	50	1	40	0	999	1	30	40	99	99	99	99	1	1	2	2	2	2	3	3	2
300207	201902216748	18681502655	14	20190221	12:46:36	3763	1	18	1001	1001	999999999999999	999999999999999	412	1	1	9	10	1	1	0	95	2	80	2	37	15	1	52	15	1	90	0	999	1	32	40	99	99	99	99	1	2	2	2	2	1	6	3	2
300196	201902216934	18137000973	19	20190221	11:45:24	2393	1	18	1001	1001	999999999999999	999999999999999	412	1	6	9	11	5	2	0	85	2	65	2	32	16	2	38	10	1	78	3	999	1	32	40	99	99	99	99	1	1	2	2	2	1	9	3	2
300235	201902217015	15283858319	34	20190221	17:57:24	785	1	99	1001	1001	999999999999999	999999999999999	409	1	6	9	13	5	4	999	999	2	999	1	21	99	9	99	99	1	999	99	999	9	99	99	99	99	99	99	9	9	9	9	9	9	999	9	4
300158	201902217139	18845059656	20	20190221	00:25:42	2564	1	18	1001	1001	999999999999999	999999999999999	388	1	6	5	11	1	7	0	100	1	0	2	24	12	1	35	3	1	999	99	999	9	99	99	99	99	99	99	9	9	9	9	9	9	999	9	3
300197	201902219230	17649964221	27	20190221	11:45:07	3019	1	18	1001	1001	999999999999999	999999999999999	360	1	1	9	10	1	1	15	999	2	80	1	22	15	1	70	50	1	65	3	999	1	32	40	99	99	99	99	1	1	2	2	2	1	8	3	2
300160	201902219416	18335901227	31	20190221	00:21:23	3652	1	18	1001	1001	999999999999999	999999999999999	389	1	1	9	10	1	1	0	75	2	95	2	25	15	1	38	50	1	72	0	999	2	32	40	99	99	99	99	1	1	2	2	1	2	8	2	2
300209	201902219526	15837998889	19	20190221	12:19:02	3406	1	18	1001	1001	999999999999999	999999999999999	404	1	1	9	10	1	1	999	100	4	80	1	36	9	4	38	50	1	999	99	999	9	99	99	99	99	99	99	9	9	9	9	9	9	999	9	3
300201	201902219598	17319323486	10	20190221	12:33:34	3697	1	18	1001	1001	999999999999999	999999999999999	401	1	6	9	11	1	1	0	50	2	80	1	22	16	1	70	4	1	57	0	999	1	30	40	99	99	99	99	2	1	2	2	2	1	7	2	2
300173	201902219837	17340790771	18	20190221	08:43:41	3544	1	18	1001	1001	999999999999999	999999999999999	404	1	1	9	10	1	1	30	90	6	80	1	21	13	1	70	2	1	86	1	999	1	32	40	99	99	99	99	1	2	2	2	2	1	10	2	2
300328	201902220714	13588847543	39	20190222	17:30:19	3460	1	18	1001	1001	999999999999999	999999999999999	316	1	6	5	14	1	1	0	80	2	70	1	20	14	1	70	50	1	63	1	999	1	30	40	99	99	99	99	1	1	1	2	2	2	9	3	2
300299	201902220804	15881766083	34	20190222	12:48:28	2428	1	18	1001	1001	999999999999999	999999999999999	402	1	6	9	11	1	1	50	90	2	999	2	23	15	1	70	4	1	82	3	999	5	30	40	99	99	99	99	1	1	2	1	9	9	8	9	5
300325	201902220961	13051020791	18	20190222	16:39:54	1030	1	18	1001	1001	999999999999999	999999999999999	117	1	6	9	11	1	1	999	999	2	999	2	23	15	1	41	3	1	999	99	999	9	99	99	99	99	99	99	9	9	9	9	9	9	999	9	4
300276	201902221108	17708395057	40	20190222	09:38:51	913	1	18	1001	1001	999999999999999	999999999999999	387	1	6	9	11	1	1	999	999	6	40	1	26	12	2	35	50	1	999	99	999	9	99	99	99	99	99	99	9	9	9	9	9	9	999	9	4
300335	201902221119	18515129899	10	20190222	19:17:02	1590	1	16	1001	1001	999999999999999	999999999999999	117	1	1	9	10	1	1	999	999	1	0	2	36	15	2	31	5	1	999	99	999	9	99	99	99	99	99	99	9	9	9	9	9	9	999	9	4
300252	201902221243	15563996181	30	20190222	03:17:04	3615	1	18	1001	1001	999999999999999	999999999999999	410	1	5	9	10	1	1	50	80	2	50	1	35	19	1	38	50	1	59	0	999	1	30	40	99	99	99	99	1	1	2	2	2	2	7	3	2
300249	201902221359	13811259798	10	20190222	00:42:57	3509	1	18	1001	1001	999999999999999	999999999999999	335	1	1	9	10	1	1	40	70	2	60	1	34	16	4	35	50	1	66	0	999	1	32	40	99	99	99	99	1	2	2	2	2	1	6	3	2
300333	201902221377	15192001938	30	20190222	19:12:06	3615	3	18	1001	1001	999999999999999	999999999999999	412	1	6	9	12	5	2	20	60	7	50	2	34	9	1	52	50	1	999	99	999	9	30	40	99	99	99	99	9	9	9	9	9	9	0	9	5
300262	201902221423	18264190406	30	20190222	07:05:09	2046	1	18	1001	1001	999999999999999	999999999999999	335	1	1	9	10	1	1	50	100	2	80	2	21	15	1	35	50	1	999	0	999	9	30	40	99	99	99	99	9	9	9	9	9	9	1	9	5
300270	201902222176	17610500056	10	20190222	09:10:11	2189	1	18	1001	1001	999999999999999	999999999999999	404	1	1	9	10	1	1	999	40	1	0	2	25	16	1	38	50	1	999	99	999	9	99	99	99	99	99	99	9	9	9	9	9	9	999	9	3
300302	201902222594	13181689879	30	20190222	13:09:39	3602	1	18	1001	1001	999999999999999	999999999999999	387	1	1	9	10	1	1	30	90	2	60	1	23	16	1	52	50	1	78	0	999	1	32	40	99	99	99	99	1	1	2	2	1	1	9	3	2
300284	201902222604	13725456931	14	20190222	10:42:42	2473	1	18	1001	1001	999999999999999	999999999999999	391	1	6	9	24	5	6	50	10	2	20	1	24	15	1	52	50	1	999	99	999	9	99	99	99	99	99	99	9	9	9	9	9	9	999	9	3
300268	201902223036	13621262149	33	20190222	08:28:59	1997	1	11	1001	1001	999999999999999	999999999999999	402	1	1	9	10	1	1	999	999	9	999	1	27	16	1	38	1	1	999	99	999	9	99	99	99	99	99	99	9	9	9	9	9	9	999	9	4
300264	201902223037	19837757543	19	20190222	08:12:09	3237	1	18	1001	1001	999999999999999	999999999999999	396	1	1	9	10	1	1	80	80	2	60	2	19	9	1	52	50	1	40	1	999	1	31	40	99	99	99	99	1	2	2	2	2	2	4	2	2
300255	201902223071	18246961211	20	20190222	04:14:05	2622	9	14	1001	1001	18846003557	999999999999999	408	1	5	6	12	1	1	0	87	3	999	1	23	10	1	70	2	1	999	0	999	9	30	40	99	99	99	99	9	9	9	9	9	9	1	9	5
300280	201902223206	18354763586	30	20190222	10:08:18	1634	1	18	1001	1001	999999999999999	999999999999999	402	1	6	7	13	1	1	50	100	6	100	1	18	11	1	70	50	1	999	5	999	9	30	40	99	99	99	99	9	9	9	9	9	9	1	9	5
300313	201902223342	17737285180	19	20190222	14:56:17	3287	1	18	1001	1001	999999999999999	999999999999999	396	1	6	7	11	1	2	50	80	1	0	2	29	18	1	52	50	1	80	0	999	1	32	40	99	99	99	99	1	1	2	2	2	2	6	2	2
300301	201902223426	18910115131	10	20190222	12:22:33	3614	1	18	1001	1001	999999999999999	999999999999999	315	1	1	9	10	1	1	0	80	1	0	2	30	16	1	52	50	1	60	0	999	1	32	40	99	99	99	99	1	1	2	2	2	2	6	3	2
300343	201902223632	18653887028	30	20190222	22:54:03	3652	1	18	1001	1001	999999999999999	999999999999999	316	1	1	9	10	1	1	100	80	2	90	1	32	16	1	52	50	1	55	0	999	1	32	40	99	99	99	99	1	1	2	2	2	1	7	2	2
300288	201902224096	13071196166	10	20190222	11:51:44	3522	1	18	1001	1001	999999999999999	999999999999999	383	1	6	9	11	5	2	20	75	2	50	1	19	14	1	70	2	1	62	2	999	1	32	40	99	99	99	99	1	2	2	1	2	1	8	3	2
300286	201902224164	18982751847	34	20190222	11:47:52	1139	1	99	1001	1001	999999999999999	999999999999999	396	1	9	9	99	9	9	10	999	1	0	1	18	14	1	70	99	1	999	99	999	9	99	99	99	99	99	99	9	9	9	9	9	9	999	9	4
300260	201902224514	15850545609	24	20190222	06:39:47	2445	1	18	1001	1001	999999999999999	999999999999999	408	1	1	9	10	1	1	0	90	2	50	1	35	18	1	38	50	1	88	0	999	1	32	40	99	99	99	99	2	1	1	2	2	2	7	3	2
300297	201902224688	15028540056	10	20190222	12:54:30	2559	1	18	1001	1001	999999999999999	999999999999999	396	1	1	9	10	1	1	999	999	2	999	2	21	16	1	70	20	1	999	99	999	9	99	99	99	99	99	99	9	9	9	9	9	9	999	9	3
300303	201902224918	15820531613	14	20190222	12:24:45	4283	1	18	1001	1001	999999999999999	999999999999999	385	1	1	9	10	1	1	10	100	5	50	1	27	16	1	52	8	1	97	0	999	1	32	40	99	99	99	99	2	2	2	2	2	2	4	2	2
300340	201902224967	18612499765	10	20190222	21:13:37	2557	1	18	1001	1001	999999999999999	999999999999999	412	1	5	9	26	1	1	100	85	1	0	1	27	99	1	99	99	1	999	99	999	9	99	99	99	99	99	99	9	9	9	9	9	9	999	9	3
300339	201902225101	18201713580	33	20190222	20:52:43	2611	1	18	1001	1001	999999999999999	999999999999999	117	1	6	9	11	1	1	35	80	1	0	2	28	19	1	38	5	1	999	99	999	9	99	99	99	99	99	99	9	9	9	9	9	9	999	9	3
300269	201902225144	18931109712	18	20190222	08:18:23	1972	1	18	1001	1001	999999999999999	999999999999999	387	1	1	9	10	1	1	10	100	6	90	1	26	16	1	35	50	1	999	3	999	9	30	40	99	99	99	99	9	9	9	9	9	9	1	9	5
300279	201902225263	15511130778	18	20190222	10:13:17	2557	1	18	1001	1001	999999999999999	999999999999999	404	1	6	5	11	5	2	30	80	2	70	2	20	13	1	70	50	1	67	0	999	1	32	40	99	99	99	99	1	2	2	2	2	1	5	2	2
300251	201902225447	13070847507	30	20190222	02:34:52	3468	1	18	1001	1001	999999999999999	999999999999999	335	1	6	9	11	1	1	2	100	1	98	2	18	9	1	35	50	1	999	99	999	9	99	99	99	99	99	99	9	9	9	9	9	9	999	9	2
300273	201902225597	15588345527	30	20190222	09:39:09	2488	1	14	1001	1001	999999999999999	999999999999999	396	1	1	9	10	1	1	65	95	2	0	2	23	16	1	70	4	1	67	0	999	1	30	40	99	99	99	99	1	2	2	2	2	1	5	2	2
300323	201902225820	15545092190	20	20190222	16:22:13	3391	1	18	1001	1001	999999999999999	999999999999999	316	1	6	9	11	1	1	0	80	2	90	2	18	12	1	70	50	1	59	2	999	1	32	40	99	99	99	99	1	1	2	2	1	2	9	3	2
300346	201902225849	13426258062	10	20190222	23:52:56	2221	1	88	1001	1001	999999999999999	999999999999999	117	1	6	9	11	5	2	999	90	1	0	2	19	12	1	70	50	1	999	99	999	9	99	99	99	99	99	99	9	9	9	9	9	9	999	9	3
300295	201902226029	13153667812	30	20190222	12:17:59	1828	1	18	1001	1001	999999999999999	999999999999999	387	1	1	9	10	1	1	999	50	1	0	2	32	9	4	21	50	1	100	0	999	1	32	40	99	99	99	99	9	9	9	9	9	9	2	9	5
300318	201902226478	18301030873	10	20190222	15:10:25	2199	1	11	1001	1001	999999999999999	999999999999999	383	1	1	9	10	1	1	10	70	2	50	2	29	15	1	38	50	1	85	3	999	1	32	40	99	99	99	99	1	2	1	2	2	1	8	3	2
300274	201902227386	2266356727	35	20190222	09:11:50	2916	1	18	1001	1001	999999999999999	999999999999999	391	1	6	9	15	1	1	90	999	1	0	1	39	16	2	40	50	1	47	0	999	1	30	40	99	99	99	99	2	1	2	2	2	2	2	3	2
300277	201902227606	13017811890	39	20190222	09:43:53	2947	1	18	1001	1001	999999999999999	999999999999999	383	1	6	5	11	5	2	55	95	2	95	1	18	13	1	70	50	1	88	3	999	1	32	40	99	99	99	99	2	2	2	2	2	1	5	3	2
300281	201902227948	13606695763	33	20190222	09:10:37	4484	1	18	1001	1001	999999999999999	999999999999999	385	1	6	9	11	1	1	25	85	4	65	1	21	13	1	70	70	1	999	99	999	9	99	99	99	99	99	99	9	9	9	9	9	9	999	9	3
300308	201902228072	15064157927	30	20190222	14:30:12	3507	1	18	1001	1001	999999999999999	999999999999999	404	1	5	9	25	1	1	50	80	1	0	1	21	12	1	70	50	1	62	0	999	1	32	40	99	99	99	99	2	2	2	2	2	2	3	2	2
300314	201902228526	13172221365	14	20190222	14:57:06	3157	1	18	1001	1001	999999999999999	999999999999999	385	1	1	9	10	1	1	80	90	2	90	2	20	12	1	70	50	1	999	2	999	9	32	40	99	99	99	99	9	9	9	9	9	9	2	9	5
300319	201902228847	13103540601	31	20190222	15:00:10	3518	2	18	1001	1001	999999999999999	999999999999999	387	1	1	9	10	1	1	0	100	2	99	2	30	16	1	40	50	1	84	0	999	1	32	40	99	99	99	99	1	1	2	2	2	2	7	2	2
300317	201902228975	18236700105	19	20190222	14:53:01	3522	1	18	1001	1001	999999999999999	999999999999999	315	1	1	9	10	1	1	60	30	2	25	2	23	15	1	70	50	1	51	0	999	2	30	40	99	99	99	99	1	1	2	2	2	1	6	3	2
300257	201902229165	18562530650	10	20190222	06:12:44	2631	3	18	1001	1001	999999999999999	999999999999999	410	1	6	9	14	5	2	50	75	2	55	1	18	11	1	70	50	1	67	0	999	1	31	40	99	99	99	99	2	2	2	2	2	2	4	3	2
300282	201902229237	17397935317	19	20190222	10:07:12	2019	1	18	1001	1001	999999999999999	999999999999999	315	1	1	9	10	1	1	0	80	6	50	2	30	9	4	35	50	1	79	1	999	9	32	40	99	99	99	99	9	9	9	9	9	9	6	9	5
300253	201902229345	18306570787	30	20190222	03:27:22	2297	1	18	1001	1001	999999999999999	999999999999999	408	1	6	9	11	1	1	999	85	3	60	1	32	12	2	35	50	1	999	0	999	9	32	40	99	99	99	99	9	9	9	9	9	9	1	9	5
300344	201902229499	18252343296	24	20190222	21:55:51	4429	2	18	1001	1001	999999999999999	999999999999999	117	1	6	9	11	5	2	10	80	2	50	1	27	16	1	40	50	1	999	99	999	9	99	99	99	99	99	99	9	9	9	9	9	9	999	9	3
300320	201902229635	17602906991	32	20190222	14:45:04	3658	1	18	1001	1001	999999999999999	999999999999999	391	1	1	9	10	1	1	0	90	2	90	2	23	16	1	70	50	1	94	1	999	1	32	40	99	99	99	99	2	2	2	2	2	2	5	3	2
300383	201902230279	18811075048	10	20190223	12:02:22	3622	1	18	1001	1001	999999999999999	999999999999999	406	1	5	5	26	1	1	100	50	1	0	1	24	16	1	38	5	1	71	0	999	1	32	40	99	99	99	99	1	1	2	2	1	2	6	2	2
300350	201902230470	13548588957	22	20190223	01:24:44	787	1	99	1001	1001	999999999999999	999999999999999	117	1	6	7	11	9	9	999	999	9	999	2	34	99	9	99	99	1	999	99	999	9	99	99	99	99	99	99	9	9	9	9	9	9	999	9	4
300408	201902231214	13965102610	11	20190223	17:37:33	1405	1	18	1001	1001	999999999999999	999999999999999	396	1	6	7	13	1	4	25	65	2	55	2	28	9	1	52	50	1	999	99	999	9	99	99	99	99	99	99	9	9	9	9	9	9	999	9	3
300382	201902231490	18600323788	10	20190223	11:40:16	2030	2	14	1001	1001	999999999999999	999999999999999	404	1	1	9	10	1	1	60	65	1	0	2	22	16	1	70	70	1	66	0	999	1	32	40	99	99	99	99	1	2	2	2	2	1	4	2	7
300387	201902231527	15998627071	26	20190223	12:34:15	2532	1	18	1001	1001	999999999999999	999999999999999	391	1	2	9	24	1	1	65	55	1	0	2	28	15	1	38	50	1	999	99	999	9	99	99	99	99	99	99	9	9	9	9	9	9	999	9	3
300414	201902231571	18098679171	11	20190223	18:48:15	1830	1	18	1001	1001	999999999999999	999999999999999	396	1	1	9	10	1	1	50	999	1	0	2	45	12	2	52	50	1	72	0	999	1	32	40	99	99	99	99	1	2	2	2	2	2	3	2	2
300396	201902231590	18895682023	11	20190223	13:42:54	3634	1	15	1001	1001	999999999999999	999999999999999	411	1	6	2	24	1	1	0	80	2	999	1	24	16	1	52	50	1	47	0	999	1	30	40	99	99	99	99	1	1	2	2	2	1	7	3	2
300363	201902231819	14703568338	31	20190223	07:36:48	2405	1	18	1001	1001	999999999999999	999999999999999	401	1	1	9	10	1	1	20	60	1	0	1	25	12	1	52	60	1	95	0	999	1	30	40	99	99	99	99	2	1	2	2	2	2	6	2	2
300354	201902232437	17638119608	19	20190223	02:00:45	1689	1	18	1001	1001	999999999999999	999999999999999	117	1	6	9	11	1	1	999	999	7	999	2	19	12	1	21	50	1	999	99	999	9	99	99	99	99	99	99	9	9	9	9	9	9	999	9	4
300362	201902232786	13141246833	10	20190223	05:56:13	3657	1	18	1001	1001	999999999999999	999999999999999	316	1	1	9	10	1	1	0	80	2	100	1	24	16	1	38	50	1	44	0	999	1	30	40	99	99	99	99	1	2	2	2	2	2	4	3	2
300403	201902233407	18797596289	22	20190223	15:10:26	3339	1	18	1001	1001	999999999999999	999999999999999	411	1	6	9	16	1	1	45	65	2	20	1	36	8	6	52	50	1	49	1	999	1	31	40	99	99	99	99	1	2	2	2	2	2	5	3	2
300398	201902233617	13931630371	18	20190223	14:24:49	2772	1	18	1001	1001	999999999999999	999999999999999	391	1	6	9	11	1	1	0	999	2	50	2	19	11	1	21	50	1	74	0	999	1	30	40	99	99	99	99	1	2	2	2	2	2	4	3	2
300418	201902233667	19933308070	18	20190223	20:22:04	3445	1	18	1001	1001	999999999999999	999999999999999	396	1	1	9	10	1	1	25	85	2	25	2	19	12	1	38	70	1	60	0	999	1	30	40	99	99	99	99	2	1	2	2	2	1	7	2	2
300355	201902234175	18653953218	30	20190223	02:49:52	3153	1	18	1001	1001	999999999999999	999999999999999	117	1	6	9	11	5	2	999	95	2	100	2	19	9	1	21	50	1	58	0	999	1	32	40	99	99	99	99	1	2	2	2	2	2	4	2	2
300407	201902234998	13685824735	39	20190223	17:29:08	2080	1	18	1001	1001	999999999999999	999999999999999	386	1	1	9	10	1	1	20	0	2	999	2	24	9	1	88	1	1	73	0	999	1	30	40	99	99	99	99	1	1	2	2	9	9	5	9	5
300378	201902235224	18778152811	34	20190223	10:53:56	3158	1	18	1001	1001	999999999999999	999999999999999	388	1	1	9	10	1	1	0	100	1	0	2	19	12	1	70	60	1	66	1	999	1	30	40	99	99	99	99	1	1	2	2	2	1	8	3	2
300420	201902235615	18311005612	10	20190223	20:36:25	1739	2	88	1001	1001	999999999999999	999999999999999	402	1	1	9	10	1	1	95	999	1	0	2	27	16	1	38	3	1	999	99	999	9	99	99	99	99	99	99	9	9	9	9	9	9	999	9	4
300404	201902235626	18561977272	30	20190223	16:18:06	3438	1	18	1001	1001	999999999999999	999999999999999	402	1	1	9	10	1	1	1	100	1	0	1	35	19	4	38	18	1	54	0	999	1	32	40	99	99	99	99	1	1	2	1	2	2	7	2	2
300423	201902235781	18617735075	18	20190223	22:12:51	3716	2	12	1001	1001	999999999999999	999999999999999	383	1	6	9	11	5	2	0	85	2	50	2	24	16	1	52	50	1	82	0	999	1	32	40	99	99	99	99	2	1	2	2	2	1	7	3	2
300371	201902235843	18138500705	10	20190223	09:55:42	1185	1	99	1001	1001	999999999999999	999999999999999	404	1	1	9	10	1	1	999	999	9	999	1	25	99	9	38	99	1	999	99	999	9	99	99	99	99	99	99	9	9	9	9	9	9	999	9	4
300353	201902235892	18801261093	11	20190223	01:57:33	2598	5	18	1001	1001	999999999999999	999999999999999	412	1	6	9	24	1	1	0	90	2	80	2	20	9	1	52	50	1	90	1	999	1	32	40	99	99	99	99	1	1	2	2	2	2	8	3	2
300384	201902236449	13476520963	21	20190223	12:42:24	2598	1	18	1001	1001	999999999999999	999999999999999	385	1	6	7	11	5	5	50	50	1	0	2	26	12	1	38	50	1	999	99	999	9	99	99	99	99	99	99	9	9	9	9	9	9	999	9	3
300379	201902237225	18201292963	10	20190223	10:23:31	2189	81	13	1001	1001	89334151	999999999999999	385	1	2	9	24	1	1	80	85	1	0	1	29	12	1	52	50	1	28	0	999	1	30	40	99	99	99	99	2	2	1	2	2	2	2	2	2
300361	201902237303	13701130200	10	20190223	06:47:33	2823	1	14	1001	1001	999999999999999	999999999999999	412	1	6	5	11	1	1	65	999	2	999	1	42	11	1	52	17	1	999	99	999	9	99	99	99	99	99	99	9	9	9	9	9	9	999	9	3
300397	201902237690	18838995545	10	20190223	14:57:30	917	1	99	1001	1001	999999999999999	999999999999999	404	1	1	9	10	1	1	999	999	9	999	1	29	99	4	99	99	1	999	99	999	9	99	99	99	99	99	99	9	9	9	9	9	9	999	9	4
300409	201902237719	19972072809	21	20190223	17:43:28	3629	1	18	1001	1001	999999999999999	999999999999999	383	1	6	7	11	5	2	60	50	2	1	1	28	16	4	35	4	1	43	0	999	1	30	40	99	99	99	99	2	1	2	1	1	1	7	3	2
300399	201902237796	15532660630	10	20190223	14:53:31	2622	1	18	1001	1001	999999999999999	999999999999999	406	1	1	1	10	1	1	95	70	1	0	1	18	11	1	70	5	1	17	0	999	1	30	40	99	99	99	99	2	1	2	2	2	2	3	2	2
300359	201902238138	18856300295	30	20190223	05:00:46	3741	1	18	1001	1001	999999999999999	999999999999999	401	1	1	9	10	1	1	20	92	2	45	2	20	14	1	70	50	1	85	0	999	1	32	40	99	99	99	99	1	2	2	2	2	2	5	2	2
300358	201902238157	13129339687	40	20190223	03:54:17	3644	1	18	1001	1001	999999999999999	999999999999999	316	1	5	9	26	1	1	100	30	2	100	1	20	14	1	70	50	1	83	1	999	1	32	40	99	99	99	99	1	1	2	2	1	1	8	3	2
300406	201902238305	18962163619	24	20190223	16:41:49	2343	1	18	1001	1001	999999999999999	999999999999999	383	1	6	9	11	1	6	10	85	2	75	2	32	12	2	40	50	1	83	0	999	1	30	40	99	99	99	99	2	2	2	2	2	2	4	3	2
300391	201902238436	15215768820	39	20190223	14:03:28	1076	1	18	1001	1001	999999999999999	999999999999999	406	1	1	1	10	1	1	50	50	1	0	1	25	15	1	52	20	1	38	0	999	1	31	40	99	99	99	99	2	2	2	2	2	2	2	2	2
300377	201902239497	13261207186	10	20190223	09:44:51	3298	1	18	1001	1001	999999999999999	999999999999999	391	1	1	9	10	1	1	45	70	2	60	2	24	18	1	70	5	1	77	0	999	1	30	40	99	99	99	99	1	1	2	1	2	1	9	3	2
300374	201902239521	15737034792	19	20190223	09:11:01	3698	1	18	1001	1001	999999999999999	999999999999999	332	1	1	9	10	1	1	0	80	2	90	2	22	15	1	52	50	1	54	0	999	1	31	40	99	99	99	99	1	2	2	2	2	2	5	3	2
300390	201902239645	13923096304	14	20190223	13:50:21	857	1	99	1001	1001	999999999999999	999999999999999	404	1	5	9	26	1	1	999	999	2	999	2	30	99	1	99	99	1	999	99	999	9	99	99	99	99	99	99	9	9	9	9	9	9	999	9	4
300411	201902239925	18378119060	15	20190223	18:15:54	3721	6	18	1001	1001	18778075792	999999999999999	386	1	6	9	11	5	2	40	65	2	25	1	20	16	1	70	50	1	72	0	999	1	30	40	99	99	99	99	1	1	2	2	2	2	7	2	2
300365	201902239980	51985559883	24	20190223	08:01:58	3610	1	18	1001	1001	999999999999999	999999999999999	406	1	1	1	10	1	1	0	100	2	80	2	52	16	2	52	60	1	92	0	999	5	32	40	99	99	99	99	2	2	2	1	2	2	6	2	2
300491	201902240274	15611755585	10	20190224	16:24:39	4456	1	18	1001	1001	999999999999999	999999999999999	315	1	6	9	11	1	1	60	99	7	85	1	29	7	4	44	11	1	999	99	999	9	99	99	99	99	99	99	9	9	9	9	9	9	999	9	3
300477	201902241094	15739006613	30	20190224	12:41:35	3361	1	18	1001	1001	999999999999999	999999999999999	391	1	6	9	11	1	1	10	90	3	90	2	18	13	1	70	70	1	77	0	999	1	32	40	99	99	99	99	1	2	2	2	1	1	7	3	2
300463	201902242350	15804355127	23	20190224	12:00:26	5317	1	18	1001	1001	999999999999999	999999999999999	388	1	1	9	10	1	1	0	100	2	95	1	24	16	1	52	50	1	94	0	999	1	32	40	99	99	99	99	1	1	2	1	1	1	10	3	2
300487	201902242518	13520923762	40	20190224	14:22:24	3946	1	18	1001	1001	999999999999999	999999999999999	403	1	6	9	11	1	1	0	85	2	60	1	23	16	1	70	50	1	74	0	999	1	32	40	99	99	99	99	1	2	2	1	2	1	7	2	2
300469	201902243287	13699166950	10	20190224	12:23:15	3731	1	18	1001	1001	999999999999999	999999999999999	332	1	1	9	10	1	1	50	75	1	0	1	31	16	1	38	2	1	61	0	999	1	32	40	99	99	99	99	1	2	1	2	2	2	5	3	2
300446	201902243546	18818337405	14	20190224	09:12:40	3832	1	18	1001	1001	999999999999999	999999999999999	388	1	1	9	10	1	1	45	999	2	999	2	25	8	1	52	50	1	67	0	999	1	30	40	99	99	99	99	1	2	2	2	2	1	5	3	2
300501	201902243598	15705964950	12	20190224	23:24:39	5782	1	18	1001	1001	999999999999999	999999999999999	390	1	1	1	10	1	1	25	85	2	65	2	21	16	1	70	4	1	90	2	999	1	32	40	99	99	99	99	1	1	2	2	2	1	9	3	2
300457	201902243928	13862276117	24	20190224	09:21:50	2143	1	18	1001	1001	999999999999999	999999999999999	389	1	1	9	10	1	1	75	55	1	0	1	47	16	4	38	50	1	999	99	999	9	99	99	99	99	99	99	9	9	9	9	9	9	999	9	3
300452	201902244520	17815327469	40	20190224	09:02:37	3415	1	18	1001	1001	999999999999999	999999999999999	403	1	6	9	11	1	1	0	100	2	100	2	34	12	3	20	50	1	100	0	999	1	32	40	99	99	99	99	1	2	2	2	2	1	6	2	2
300478	201902244739	18277064832	15	20190224	14:02:18	618	1	99	1001	1001	999999999999999	999999999999999	403	1	9	9	99	9	9	999	999	9	999	1	20	13	1	70	99	1	999	99	999	9	99	99	99	99	99	99	9	9	9	9	9	9	999	9	4
300434	201902245097	17312137064	18	20190224	04:43:11	2352	1	11	1001	1001	999999999999999	999999999999999	402	1	6	9	12	5	2	0	85	6	90	1	25	12	1	52	50	1	999	99	999	9	99	99	99	99	99	99	9	9	9	9	9	9	999	9	3
300497	201902245194	13377854438	21	20190224	21:09:12	2546	1	18	1001	1001	999999999999999	999999999999999	404	1	6	9	24	1	1	19	70	2	60	1	18	12	1	70	50	1	999	99	999	9	99	99	99	99	99	99	9	9	9	9	9	9	999	9	3
300500	201902245498	15753346804	30	20190224	22:39:46	1260	1	18	1001	1001	999999999999999	999999999999999	404	1	6	9	11	1	1	999	80	2	50	1	18	11	1	70	50	1	999	99	999	9	99	99	99	99	99	99	9	9	9	9	9	9	999	9	4
300496	201902246218	15940281649	26	20190224	20:30:49	671	3	18	1001	1001	999999999999999	999999999999999	315	1	1	9	10	1	1	999	999	2	100	1	27	99	1	52	50	1	999	2	999	9	30	40	99	99	99	99	9	9	9	9	9	9	5	9	5
300432	201902246829	15178525176	11	20190224	03:29:24	1096	1	18	1001	1001	999999999999999	999999999999999	383	1	1	9	10	1	1	20	90	2	70	2	24	16	1	52	60	1	999	99	999	9	99	99	99	99	99	99	9	9	9	9	9	9	999	9	3
300450	201902247040	17327083594	24	20190224	09:48:29	3379	1	18	1001	1001	999999999999999	999999999999999	387	1	6	2	11	1	1	999	999	2	10	1	27	16	2	39	10	1	999	99	999	9	30	40	99	99	99	99	9	9	9	9	9	9	0	9	5
300430	201902247670	15617700982	19	20190224	01:32:15	3188	1	18	1001	1001	999999999999999	999999999999999	396	1	6	9	12	1	4	10	100	5	90	1	36	16	1	44	50	1	88	1	999	1	32	40	99	99	99	99	1	2	2	2	2	1	10	2	2
300453	201902247757	13810597617	10	20190224	09:57:48	2495	1	18	1001	1001	999999999999999	999999999999999	389	1	1	9	10	1	1	999	80	1	0	1	32	20	1	38	50	1	999	99	999	9	99	99	99	99	99	99	9	9	9	9	9	9	999	9	3
300454	201902248239	17317507313	25	20190224	09:16:17	3694	2	18	1001	1001	999999999999999	999999999999999	332	1	5	9	12	1	1	0	90	2	80	2	20	9	1	52	50	1	82	0	999	1	32	40	99	99	99	99	1	1	2	1	2	2	8	2	2
300429	201902249052	18755709264	11	20190224	00:19:46	2389	1	18	1001	1001	999999999999999	999999999999999	396	1	1	9	10	1	1	999	90	2	50	2	24	15	1	70	50	1	999	99	999	9	99	99	99	99	99	99	9	9	9	9	9	9	999	9	3
300502	201902249503	13232877160	14	20190224	20:35:10	3617	1	18	1001	1001	999999999999999	999999999999999	385	1	1	9	10	1	1	0	90	1	85	2	23	15	1	52	50	1	80	0	999	1	32	40	99	99	99	99	2	1	2	2	2	2	6	2	2
300459	201902249594	13777656016	39	20190224	11:07:09	2003	1	18	1001	1001	999999999999999	999999999999999	391	1	1	9	10	1	1	50	80	2	30	2	24	11	1	52	50	1	77	0	999	1	32	40	99	99	99	99	1	1	2	2	2	2	7	3	2
300554	201902250198	17887320131	10	20190225	14:32:07	1353	1	99	1001	1001	999999999999999	999999999999999	388	1	1	9	10	1	1	0	20	1	0	1	18	11	1	52	99	1	999	99	999	9	99	99	99	99	99	99	9	9	9	9	9	9	999	9	4
300541	201902250560	15715862585	39	20190225	12:24:41	3817	1	18	1001	1001	999999999999999	999999999999999	388	1	1	9	10	1	1	95	90	2	25	1	28	16	1	52	50	1	81	0	999	1	32	40	99	99	99	99	1	1	2	2	1	2	7	3	2
300575	201902250902	17324089280	14	20190225	18:37:38	3547	1	18	1001	1001	999999999999999	999999999999999	406	1	1	1	10	1	1	50	50	2	50	1	23	16	1	38	3	1	64	0	999	1	32	40	99	99	99	99	1	1	2	2	2	2	7	2	2
300580	201902251112	15982224896	34	20190225	20:08:16	1934	2	18	1001	1001	999999999999999	999999999999999	406	1	1	1	10	1	1	15	100	2	70	1	18	11	1	70	70	1	88	0	999	1	32	40	99	99	99	99	1	1	2	1	2	1	9	2	2
300521	201902251169	15250365748	33	20190225	08:21:54	636	2	18	1001	1001	999999999999999	999999999999999	408	1	9	9	99	9	9	999	999	2	9	1	20	20	1	21	1	1	999	99	999	9	99	99	99	99	99	99	9	9	9	9	9	9	999	9	4
300532	201902251713	13554270891	12	20190225	09:47:48	3443	1	18	1001	1001	999999999999999	999999999999999	408	1	1	9	10	1	1	30	75	1	0	1	29	15	1	44	2	1	81	0	999	3	32	40	99	99	99	99	1	1	2	2	2	1	8	3	2
300553	201902251974	18571531853	21	20190225	14:31:55	3163	1	18	1001	1001	999999999999999	999999999999999	408	1	6	9	11	5	2	20	90	6	70	1	23	15	1	35	50	1	92	3	999	1	32	40	99	99	99	99	1	2	2	2	2	1	7	3	2
300551	201902252042	13796760717	10	20190225	13:35:15	2079	1	11	1001	1001	999999999999999	999999999999999	403	1	6	9	11	5	2	10	60	2	80	1	25	16	1	38	70	1	999	0	999	9	30	40	99	99	99	99	9	9	9	9	9	9	1	9	5
300510	201902252424	15157618502	11	20190225	04:03:37	3599	1	18	1001	1001	999999999999999	999999999999999	404	1	1	9	10	1	1	60	80	2	50	2	34	12	4	38	50	1	76	0	999	1	32	40	99	99	99	99	1	2	2	2	2	2	4	2	2
300514	201902252996	13664199513	26	20190225	04:21:06	3603	11	18	1001	1001	13401077644	999999999999999	385	1	6	5	12	5	2	10	80	2	50	2	24	16	1	52	50	1	72	0	999	4	32	40	99	99	99	99	2	2	2	1	2	1	6	2	2
300543	201902253635	17078876065	26	20190225	12:56:20	3369	1	18	1001	1001	999999999999999	999999999999999	408	1	6	9	11	1	1	50	100	5	20	1	22	9	1	52	10	1	70	5	999	1	32	40	99	99	99	99	1	2	2	1	2	1	11	3	2
300578	201902253976	13058670090	39	20190225	18:37:48	3196	1	88	1001	1001	999999999999999	999999999999999	391	1	1	9	10	1	1	20	100	2	50	2	24	11	1	35	2	1	86	0	999	1	32	40	99	99	99	99	1	2	1	2	2	2	6	3	2
300582	201902254094	13220935099	30	20190225	19:42:43	3520	1	14	1001	1001	999999999999999	999999999999999	411	1	6	9	11	5	2	45	85	1	0	1	50	9	2	38	50	1	59	0	999	1	32	40	99	99	99	99	1	2	2	2	2	2	5	3	2
300557	201902254378	18080873710	34	20190225	15:16:33	3651	1	18	1001	1001	999999999999999	999999999999999	386	1	1	9	10	1	1	50	70	2	50	1	23	16	1	39	50	1	33	0	999	1	30	40	99	99	99	99	2	2	2	2	2	2	3	2	2
300581	201902254908	18810610795	10	20190225	19:39:05	3686	1	18	1001	1001	999999999999999	999999999999999	332	1	5	9	26	1	1	0	95	3	70	1	28	16	1	38	5	1	73	0	999	1	30	40	99	99	99	99	1	2	2	2	2	1	9	3	2
300508	201902255127	18618333703	10	20190225	02:52:50	2651	1	18	1001	1001	999999999999999	999999999999999	390	1	1	1	10	1	1	0	100	2	20	2	23	15	1	35	50	1	999	99	999	9	99	99	99	99	99	99	9	9	9	9	9	9	999	9	3
300572	201902255841	13550389614	34	20190225	18:15:20	782	1	18	1001	1001	999999999999999	999999999999999	406	1	1	1	10	1	1	50	70	2	70	1	24	16	1	35	1	1	999	99	999	9	30	40	99	99	99	99	9	9	9	9	9	9	0	9	5
300530	201902256447	13146758090	10	20190225	08:56:55	2771	1	13	1001	1001	999999999999999	999999999999999	409	1	6	9	11	1	1	0	99	1	0	1	70	9	2	60	50	1	999	99	999	9	99	99	99	99	99	99	9	9	9	9	9	9	999	9	3
300539	201902257042	19909279568	19	20190225	12:07:57	1664	1	18	1001	1001	999999999999999	999999999999999	410	1	6	9	11	1	1	25	65	5	85	2	25	9	1	52	50	1	999	99	999	9	99	99	99	99	99	99	9	9	9	9	9	9	999	9	4
300545	201902257078	18878870301	15	20190225	12:38:07	1372	3	18	1001	1001	999999999999999	999999999999999	409	1	5	9	11	1	1	55	100	1	0	1	23	16	1	52	50	1	999	99	999	9	99	99	99	99	99	99	9	9	9	9	9	9	999	9	4
300577	201902257431	18128910942	22	20190225	17:27:46	3736	1	18	1001	1001	999999999999999	999999999999999	332	1	1	9	10	1	1	50	70	2	50	2	23	16	1	38	60	1	89	1	999	1	32	40	99	99	99	99	1	1	2	2	2	1	9	2	2
300511	201902257432	18606531352	39	20190225	04:36:24	2290	1	18	1001	1001	999999999999999	999999999999999	315	1	9	9	99	9	9	999	999	5	75	2	23	99	1	38	50	1	999	99	999	9	99	99	99	99	99	99	9	9	9	9	9	9	999	9	4
300520	201902257738	15966349618	30	20190225	08:11:41	3706	1	11	1001	1001	999999999999999	999999999999999	386	1	6	9	25	5	2	15	85	2	50	1	24	15	1	88	50	1	98	0	999	1	32	40	99	99	99	99	1	1	2	2	2	1	8	2	2
300558	201902258479	13062768991	25	20190225	14:26:58	3376	1	18	1001	1001	999999999999999	999999999999999	403	1	6	5	24	1	1	25	90	2	55	1	24	16	1	39	60	1	76	0	999	5	31	40	99	99	99	99	1	1	2	1	1	1	10	2	2
300535	201902258651	13716153677	10	20190225	09:59:50	3695	2	18	1001	1001	999999999999999	999999999999999	386	1	1	9	10	1	1	65	70	1	0	1	28	18	1	52	50	1	53	0	999	1	32	40	99	99	99	99	2	1	2	2	2	2	4	2	2
300527	201902258737	19953165732	10	20190225	08:58:14	1101	1	99	1001	1001	999999999999999	999999999999999	408	1	9	9	99	9	9	999	999	9	999	1	24	16	1	99	99	1	999	99	999	9	99	99	99	99	99	99	9	9	9	9	9	9	999	9	4
300559	201902258973	13133810687	25	20190225	15:14:34	2659	18	18	1001	1001	999999999999999	999999999999999	409	1	6	2	16	1	1	65	30	1	0	2	37	17	4	43	50	1	27	0	999	1	30	40	99	99	99	99	1	2	2	2	2	1	2	2	2
300542	201902259302	17777827513	10	20190225	12:10:03	2117	1	18	1001	1001	999999999999999	999999999999999	403	1	1	1	10	1	1	100	75	2	60	2	18	10	1	35	1	1	47	0	999	1	31	40	99	99	99	99	2	2	2	2	2	2	2	2	2
300533	201902259371	13141464624	10	20190225	10:05:26	3519	1	18	1001	1001	999999999999999	999999999999999	410	1	6	5	11	1	1	35	85	3	65	1	22	16	1	38	10	1	69	0	999	1	32	40	99	99	99	99	1	2	2	2	1	2	6	3	2
300663	201902260155	15874885261	22	20190226	23:52:42	3635	4	18	1001	1001	999999999999999	999999999999999	388	1	1	9	10	1	1	60	80	1	0	1	18	11	1	70	50	1	32	0	999	1	30	40	99	99	99	99	1	2	2	2	2	2	2	3	2
300602	201902260165	18534464520	21	20190226	05:15:13	3179	1	11	1001	1001	999999999999999	999999999999999	411	1	6	9	11	1	1	999	999	2	0	1	20	9	1	35	60	1	67	1	999	5	32	40	99	99	99	99	1	1	1	2	2	1	11	3	2
300599	201902260363	15950509116	24	20190226	03:25:12	3455	1	18	1001	1001	999999999999999	999999999999999	411	1	5	6	24	1	1	55	55	1	0	1	31	18	2	39	50	1	33	0	999	1	31	40	99	99	99	99	1	2	2	2	1	2	3	3	2
300641	201902260553	18618371449	10	20190226	14:50:20	3298	1	14	1001	1001	999999999999999	999999999999999	410	1	6	9	11	1	1	999	999	2	999	1	44	19	2	38	19	1	58	0	999	1	30	40	99	99	99	99	1	1	1	2	2	2	6	3	2
300593	201902262180	18813002156	10	20190226	01:20:28	3679	3	18	1001	1001	999999999999999	999999999999999	332	1	5	6	11	1	1	15	75	2	65	2	26	18	2	70	50	1	65	0	999	1	32	40	99	99	99	99	2	1	2	2	2	2	5	3	2
300659	201902262274	15599382939	24	20190226	17:38:02	6586	1	18	1001	1001	999999999999999	999999999999999	389	1	6	9	24	1	1	5	95	4	80	2	24	15	1	70	2	1	90	1	999	1	32	40	99	99	99	99	2	1	2	2	1	1	9	2	2
300619	201902262516	18953647548	30	20190226	10:35:36	1031	1	18	1001	1001	999999999999999	999999999999999	410	1	1	9	10	1	1	80	80	1	0	1	45	16	2	52	50	1	999	99	999	9	99	99	99	99	99	99	9	9	9	9	9	9	999	9	3
300623	201902262855	15022059923	35	20190226	11:38:53	3467	1	18	1001	1001	999999999999999	999999999999999	401	1	6	9	11	1	2	30	100	2	60	2	34	19	2	40	6	1	90	0	999	1	32	40	99	99	99	99	1	1	2	2	1	1	9	2	2
300621	201902263020	15940975110	26	20190226	08:37:44	2538	1	18	1001	1001	999999999999999	999999999999999	377	1	1	9	10	1	1	50	85	1	0	1	26	15	1	52	50	1	90	0	999	1	32	40	99	99	99	99	1	2	2	2	2	1	6	2	2
300605	201902263322	13385378792	30	20190226	06:52:28	5565	1	18	1001	1001	999999999999999	999999999999999	332	1	1	9	10	1	1	5	100	4	60	2	27	15	1	52	50	1	90	1	999	1	32	40	99	99	99	99	1	1	2	2	2	2	8	2	2
300661	201902263371	15216733175	33	20190226	19:42:47	3912	4	18	1001	1001	999999999999999	999999999999999	403	1	6	9	12	1	1	0	25	2	50	2	23	16	1	70	4	1	54	1	999	1	31	40	99	99	99	99	2	1	2	2	2	2	6	2	2
300646	201902263439	15721751003	16	20190226	14:37:00	2859	1	18	1001	1001	999999999999999	999999999999999	377	1	5	9	24	1	1	40	50	2	55	1	22	14	1	70	50	1	72	1	999	1	32	40	99	99	99	99	1	1	2	2	1	2	9	2	2
300597	201902263636	18811461791	10	20190226	02:31:31	3707	1	18	1001	1001	999999999999999	999999999999999	332	1	5	9	26	1	1	50	80	2	25	1	24	18	7	70	7	1	76	0	999	1	32	40	99	99	99	99	2	1	2	2	2	2	5	3	2
300592	201902263836	18075219106	11	20190226	00:02:01	3434	1	18	1001	1001	999999999999999	999999999999999	332	1	3	9	24	1	6	40	50	1	0	2	23	12	1	52	50	1	45	0	999	1	31	40	99	99	99	99	1	2	2	2	2	1	4	3	2
300632	201902264118	17311820216	34	20190226	12:49:59	3603	1	18	1001	1001	999999999999999	999999999999999	409	1	1	9	10	1	1	999	100	2	50	2	28	12	1	21	5	1	78	0	999	1	32	40	99	99	99	99	1	1	2	2	2	2	7	2	2
300607	201902264703	15174110086	26	20190226	08:35:54	1909	1	18	1001	1001	999999999999999	999999999999999	408	1	1	9	10	1	1	0	99	2	50	2	26	12	1	21	50	1	999	99	999	9	99	99	99	99	99	99	9	9	9	9	9	9	999	9	3
300656	201902265376	15964825866	30	20190226	17:09:50	3353	1	18	1001	1001	999999999999999	999999999999999	388	1	6	7	13	5	4	0	95	2	80	2	46	19	4	40	50	1	83	0	999	1	32	40	99	99	99	99	1	2	2	2	2	2	5	3	2
300639	201902265947	18134038106	18	20190226	12:34:23	2180	2	18	1001	1001	999999999999999	999999999999999	377	1	1	9	10	1	1	45	80	1	0	2	18	11	1	70	50	1	65	0	999	1	32	40	99	99	99	99	2	1	2	2	2	1	6	2	2
300603	201902265993	18670979708	22	20190226	07:00:53	1888	1	18	1001	1001	999999999999999	999999999999999	406	1	1	1	10	1	1	10	90	2	50	2	20	15	1	38	16	1	78	0	999	1	32	40	99	99	99	99	2	1	2	2	2	1	6	2	2
300612	201902266131	18917300404	33	20190226	08:23:21	2763	1	18	1001	1001	999999999999999	999999999999999	409	1	1	9	10	1	1	85	50	1	0	1	38	15	2	52	8	1	42	0	999	1	31	40	99	99	99	99	2	1	2	2	2	1	4	2	2
300620	201902266750	18739029871	19	20190226	09:44:33	2690	1	18	1001	1001	999999999999999	999999999999999	117	1	5	9	24	1	1	45	80	1	0	1	53	12	2	60	50	1	999	99	999	9	99	99	99	99	99	99	9	9	9	9	9	9	999	9	3
300625	201902266900	15998547887	26	20190226	12:06:46	3440	7	18	1001	1001	41182481387	999999999999999	408	1	6	9	16	1	1	999	90	1	0	1	29	16	1	52	50	1	33	0	999	1	30	40	99	99	99	99	1	2	2	2	2	2	2	2	2
300598	201902267102	13527680096	14	20190226	03:39:59	3741	1	18	1001	1001	999999999999999	999999999999999	391	1	3	9	26	1	1	75	85	2	35	1	37	11	1	38	60	1	51	1	999	1	32	40	99	99	99	99	1	1	2	2	2	2	7	3	2
300614	201902267282	17775749674	14	20190226	09:25:48	4109	1	18	1001	1001	999999999999999	999999999999999	408	1	1	9	10	1	1	999	100	4	90	2	25	16	1	52	60	1	86	0	999	2	32	40	99	99	99	99	1	1	2	2	1	2	10	3	2
300604	201902268795	13818980457	33	20190226	06:56:57	2554	1	18	1001	1001	999999999999999	999999999999999	411	1	5	9	24	1	1	100	100	3	80	1	22	16	1	88	50	1	999	99	999	9	30	40	99	99	99	99	9	9	9	9	9	9	0	9	3
300647	201902268837	15866882588	30	20190226	14:52:33	3209	1	18	1001	1001	999999999999999	999999999999999	409	1	1	9	10	1	1	999	80	1	0	2	47	9	2	44	50	1	78	0	999	1	32	40	99	99	99	99	1	2	2	2	2	1	4	2	2
300657	201902268882	18873857630	22	20190226	17:03:24	3619	1	18	1001	1001	999999999999999	999999999999999	387	1	1	9	10	1	1	50	80	2	50	1	29	15	2	52	50	1	85	1	999	1	32	40	99	99	99	99	1	2	2	2	1	2	7	3	2
300608	201902269516	18270040581	25	20190226	08:35:47	2113	4	18	1001	1001	999999999999999	999999999999999	401	1	5	9	25	1	1	999	100	2	999	2	36	9	1	52	50	1	999	99	999	9	99	99	99	99	99	99	9	9	9	9	9	9	999	9	3
300655	201902269690	15830992680	18	20190226	17:02:29	2530	1	18	1001	1001	999999999999999	999999999999999	403	1	6	9	11	1	1	50	999	1	0	2	36	16	2	38	50	1	50	0	999	1	30	40	99	99	99	99	2	2	2	2	2	1	3	2	2
300723	201902270228	18259044467	19	20190227	13:21:26	2503	1	18	1001	1001	999999999999999	999999999999999	404	1	7	6	11	1	1	10	90	2	90	1	25	18	1	52	50	1	999	99	999	9	99	99	99	99	99	99	9	9	9	9	9	9	999	9	3
300751	201902270603	17679417496	25	20190227	23:09:37	3135	1	18	1001	1001	999999999999999	999999999999999	410	1	1	9	10	1	1	69	999	2	40	2	20	16	1	35	2	1	67	0	999	1	30	40	99	99	99	99	2	2	2	1	2	1	4	3	2
300694	201902271270	13670457428	14	20190227	10:12:29	2768	1	18	1001	1001	999999999999999	999999999999999	401	1	1	9	10	1	1	45	75	2	999	1	22	16	1	70	4	1	45	0	999	1	31	40	99	99	99	99	1	2	2	2	2	1	5	2	2
300743	201902271501	13161706352	10	20190227	20:01:23	3006	1	18	1001	1001	999999999999999	999999999999999	408	1	1	9	10	1	1	90	85	1	0	1	21	14	1	70	50	1	37	0	999	1	30	40	99	99	99	99	2	1	2	2	2	2	3	3	2
300734	201902271651	15320589283	40	20190227	16:14:51	2565	2	16	1001	1001	999999999999999	999999999999999	410	1	1	9	10	1	1	80	90	2	75	2	26	12	1	40	50	1	75	0	999	1	32	40	99	99	99	99	2	2	1	2	2	2	4	3	2
300722	201902272067	18691483104	32	20190227	13:48:09	2268	2	18	1001	1001	999999999999999	999999999999999	401	1	1	9	10	1	1	50	30	1	0	1	22	16	1	38	50	1	55	0	999	1	32	40	99	99	99	99	1	2	2	2	2	2	3	2	2
300696	201902272376	18984720806	16	20190227	10:19:41	2443	1	18	1001	1001	999999999999999	999999999999999	402	1	1	9	10	1	1	25	85	2	55	1	39	12	6	38	50	1	80	0	999	1	32	40	99	99	99	99	1	1	2	9	9	9	5	9	5
300715	201902273659	13315374721	18	20190227	13:19:29	3548	1	11	1001	1001	999999999999999	999999999999999	396	1	1	9	10	1	1	50	80	1	0	1	23	15	1	40	50	1	76	0	999	1	32	40	99	99	99	99	1	2	2	1	1	2	6	2	2
300741	201902273804	18192481426	32	20190227	19:21:56	3367	1	18	1001	1001	999999999999999	999999999999999	410	1	1	9	10	1	1	0	0	6	99	2	27	12	1	52	50	1	78	1	999	1	30	40	99	99	99	99	2	2	2	2	2	2	7	3	2
300727	201902274024	15010975578	10	20190227	13:49:43	5181	1	18	1001	1001	999999999999999	999999999999999	117	1	6	9	16	1	1	999	100	1	0	1	22	16	1	52	50	1	999	0	999	9	30	40	99	99	99	99	9	9	9	9	9	9	0	9	5
300732	201902274340	18812150912	18	20190227	15:18:04	3623	1	18	1001	1001	999999999999999	999999999999999	402	1	1	9	10	1	1	0	100	2	80	1	33	15	2	52	50	1	92	0	999	1	32	40	99	99	99	99	1	1	1	1	2	2	9	2	2
300674	201902274432	15222283006	30	20190227	06:10:28	3691	2	18	1001	1001	999999999999999	999999999999999	387	1	1	9	10	1	1	0	90	2	50	2	29	12	1	38	2	1	75	1	999	1	30	40	99	99	99	99	1	1	1	2	2	2	9	2	2
300712	201902275252	17770215096	25	20190227	12:54:37	966	1	18	1001	1001	999999999999999	999999999999999	383	1	6	9	24	1	1	50	90	2	40	1	18	11	1	70	50	1	999	99	999	9	99	99	99	99	99	99	9	9	9	9	9	9	999	9	4
300753	201902275358	18637199160	19	20190227	23:39:45	3525	1	18	1001	1001	999999999999999	999999999999999	335	1	1	9	10	1	1	50	90	2	95	1	22	16	1	70	50	1	86	0	999	1	32	40	99	99	99	99	1	1	2	2	1	1	9	3	2
300737	201902275379	18092218505	32	20190227	16:33:11	4493	1	18	1001	1001	999999999999999	999999999999999	409	1	5	9	10	1	1	999	999	5	99	1	35	15	1	38	50	1	81	3	999	1	32	40	99	99	99	99	1	1	2	2	2	1	10	2	2
300687	201902275617	18101098056	10	20190227	09:01:29	3507	1	18	1001	1001	999999999999999	999999999999999	396	1	6	9	11	1	2	50	100	6	75	1	40	9	4	52	50	1	71	10	999	5	32	40	99	99	99	99	2	1	1	1	2	2	10	2	2
300728	201902275627	18018666857	33	20190227	15:01:02	1286	1	18	1001	1001	999999999999999	999999999999999	401	1	6	9	13	1	1	99	0	1	0	2	18	99	1	52	50	1	999	99	999	9	99	99	99	99	99	99	9	9	9	9	9	9	999	9	1
300672	201902275789	18616018823	33	20190227	03:36:53	4027	1	18	1001	1001	999999999999999	999999999999999	387	1	6	9	11	1	1	30	99	2	75	2	29	18	1	38	11	1	94	0	999	1	32	40	99	99	99	99	2	2	2	2	2	2	4	3	2
300733	201902275889	18240552109	10	20190227	15:09:51	3681	1	18	1001	1001	999999999999999	999999999999999	360	1	1	9	10	1	1	999	90	2	60	1	36	12	6	52	2	1	84	0	999	1	32	40	99	99	99	99	1	1	2	1	2	2	7	3	2
300689	201902276579	17692756768	18	20190227	09:15:22	3339	1	18	1001	1001	999999999999999	999999999999999	383	1	1	9	10	1	1	85	100	1	0	1	40	16	2	39	50	1	27	0	999	1	30	40	99	99	99	99	2	2	2	2	2	1	2	3	2
300676	201902276814	18617433633	18	20190227	06:10:55	1627	1	18	1001	1001	999999999999999	999999999999999	403	1	1	1	10	1	1	60	100	2	80	2	29	9	3	44	50	1	999	99	999	9	99	99	99	99	99	99	9	9	9	9	9	9	999	9	3
300724	201902277266	18983416338	40	20190227	14:39:01	687	1	18	1001	1001	999999999999999	999999999999999	396	1	9	9	99	9	9	999	999	9	999	2	29	16	1	40	50	1	999	99	999	9	99	99	99	99	99	99	9	9	9	9	9	9	999	9	4
300719	201902277405	15938887913	19	20190227	13:26:42	3351	1	14	1001	1001	999999999999999	999999999999999	360	1	6	9	11	1	1	50	100	2	50	2	32	12	2	44	50	1	80	0	999	1	32	40	99	99	99	99	2	1	2	2	2	1	7	3	2
300684	201902277488	17864739427	30	20190227	08:38:01	3579	1	18	1001	1001	999999999999999	999999999999999	402	1	5	9	26	1	1	60	90	1	0	1	20	14	1	70	60	1	52	0	999	1	31	40	99	99	99	99	2	1	2	2	2	2	4	2	2
300711	201902278090	15991800162	32	20190227	12:50:11	1116	1	18	1001	1001	999999999999999	999999999999999	404	1	1	9	10	1	1	0	100	2	999	1	45	99	2	50	50	1	999	99	999	9	99	99	99	99	99	99	9	9	9	9	9	9	999	9	3
300706	201902278620	13309711767	29	20190227	11:50:24	3169	1	18	1001	1001	999999999999999	999999999999999	412	1	1	9	10	1	1	999	90	2	90	2	29	12	2	44	50	1	90	0	999	4	32	40	99	99	99	99	1	2	2	2	2	2	5	3	2
300710	201902278888	13932239899	18	20190227	12:31:52	3430	11	18	1001	1001	999999999999999	999999999999999	402	1	1	9	10	1	1	40	60	1	0	2	29	15	1	20	50	1	50	0	999	1	30	40	99	99	99	99	2	2	2	2	2	1	4	2	2
300675	201902278906	18851007033	24	20190227	05:34:58	3607	1	18	1001	1001	999999999999999	999999999999999	389	1	1	9	10	1	1	50	80	2	50	2	26	12	1	52	50	1	81	4	999	5	32	40	99	99	99	99	1	2	2	2	1	1	9	2	2
300685	201902278933	19969514692	23	20190227	08:21:38	1982	1	18	1001	1001	999999999999999	999999999999999	117	1	6	9	11	1	1	999	999	1	0	1	18	11	1	70	50	1	999	99	999	9	99	99	99	99	99	99	9	9	9	9	9	9	999	9	3
300755	201902280086	13102113567	35	20190228	01:15:31	3276	2	14	1001	1001	999999999999999	999999999999999	335	1	1	9	10	1	8	10	70	1	0	2	24	16	1	52	1	1	61	1	999	1	32	40	99	99	99	99	1	2	2	2	2	1	6	3	2
300776	201902280309	15070037739	25	20190228	10:24:36	712	1	18	1001	1001	999999999999999	999999999999999	383	1	6	9	11	1	1	999	999	9	999	1	21	15	1	70	50	1	999	99	999	9	99	99	99	99	99	99	9	9	9	9	9	9	999	9	4
300803	201902280419	13857807609	39	20190228	17:28:01	3642	1	18	1001	1001	999999999999999	999999999999999	316	1	1	9	10	1	1	0	90	2	60	1	20	14	1	70	50	1	75	0	999	1	30	40	99	99	99	99	1	1	2	2	1	1	9	3	2
300771	201902280488	15203318984	18	20190228	08:40:36	2778	1	18	1001	1001	999999999999999	999999999999999	402	1	1	9	10	1	1	40	80	4	50	1	18	11	1	70	50	1	72	15	999	1	32	40	99	99	99	99	2	1	2	2	1	1	9	2	2
300759	201902280569	18258335861	39	20190228	03:52:36	3237	1	18	1001	1001	999999999999999	999999999999999	410	1	1	9	10	1	1	60	100	2	60	2	43	12	2	44	11	1	79	0	999	1	32	40	99	99	99	99	1	1	2	2	2	2	6	3	2
300761	201902280818	13438382691	34	20190228	04:32:38	2362	4	14	1001	1001	999999999999999	999999999999999	408	1	6	5	24	1	1	999	0	1	0	1	27	16	1	39	6	1	999	99	999	9	99	99	99	99	99	99	9	9	9	9	9	9	999	9	3
300795	201902281876	18222585853	35	20190228	16:25:59	2106	1	18	1001	1001	999999999999999	999999999999999	401	1	6	9	11	1	1	35	99	3	60	2	33	12	2	38	5	1	999	99	999	9	99	99	99	99	99	99	9	9	9	9	9	9	999	9	3
300810	201902282270	15369271441	18	20190228	19:51:20	1158	6	18	1001	1001	999999999999999	999999999999999	117	1	1	9	10	1	1	999	999	2	999	1	37	12	2	52	99	1	999	99	999	9	99	99	99	99	99	99	9	9	9	9	9	9	999	9	4
300769	201902283080	13134303220	23	20190228	08:06:18	3591	1	18	1001	1001	999999999999999	999999999999999	396	1	1	9	10	1	1	10	999	2	70	1	18	12	1	52	3	1	78	10	999	1	32	40	99	99	99	99	1	2	2	2	2	2	5	2	2
300770	201902283631	17684867052	27	20190228	08:24:44	2683	1	18	1001	1001	999999999999999	999999999999999	383	1	6	9	25	1	1	0	65	2	60	1	22	10	1	35	50	1	82	2	999	4	32	40	99	99	99	99	1	2	1	1	2	1	10	3	2
300800	201902283790	13255210391	14	20190228	16:12:14	4099	1	18	1001	1001	999999999999999	999999999999999	117	1	1	9	10	1	1	0	100	4	90	2	23	12	1	52	60	1	999	99	999	9	99	99	99	99	99	99	9	9	9	9	9	9	999	9	3
300796	201902283917	13819193377	39	20190228	16:30:42	1853	1	18	1001	1001	999999999999999	999999999999999	412	1	5	2	10	1	1	50	60	2	25	2	36	15	2	44	4	1	19	0	999	1	30	40	99	99	99	99	2	1	2	2	2	1	6	3	2
300809	201902283920	13994978076	31	20190228	19:03:29	3164	1	18	1001	1001	999999999999999	999999999999999	412	1	3	9	10	1	1	25	999	1	0	1	20	6	1	52	1	1	67	1	999	1	32	40	99	99	99	99	1	2	2	1	2	2	5	3	2
300756	201902284441	16601284320	19	20190228	02:09:18	2623	1	18	1001	1001	999999999999999	999999999999999	409	1	1	9	10	1	1	10	40	2	50	2	19	7	1	52	50	1	20	0	999	1	30	40	99	99	99	99	2	1	2	2	2	2	4	2	2
300758	201902284452	18632760951	18	20190228	03:30:33	2369	1	18	1001	1001	999999999999999	999999999999999	408	1	6	9	25	5	2	25	95	7	70	1	18	11	1	70	50	1	999	99	999	9	99	99	99	99	99	99	9	9	9	9	9	9	999	9	3
300789	201902285252	13922216472	14	20190228	14:37:43	3480	1	18	1001	1001	999999999999999	999999999999999	396	1	6	9	12	1	4	50	80	1	0	2	42	16	1	40	50	1	76	0	999	1	32	40	99	99	99	99	1	1	2	2	2	2	6	2	2
300780	201902286207	15666750616	30	20190228	11:48:15	1532	1	18	1001	1001	999999999999999	999999999999999	402	1	1	9	10	1	1	999	100	2	75	2	25	15	1	38	50	1	999	99	999	9	30	40	99	99	99	99	9	9	9	9	9	9	0	9	5
300784	201902286908	15206039515	12	20190228	13:25:15	1608	1	11	1001	1001	999999999999999	999999999999999	396	1	2	9	26	1	1	30	80	2	70	2	35	12	1	44	50	1	999	99	999	9	99	99	99	99	99	99	9	9	9	9	9	9	999	9	3
300767	201902287078	18363805390	30	20190228	07:27:40	2225	1	18	1001	1001	999999999999999	999999999999999	408	1	1	9	10	1	1	40	80	2	999	2	29	16	1	38	50	1	64	0	999	1	30	40	99	99	99	99	1	1	1	2	2	1	9	3	2
300766	201902287691	13941807597	26	20190228	06:18:05	2023	1	13	1001	1001	999999999999999	999999999999999	335	1	2	9	24	1	1	70	70	1	0	1	44	12	1	38	50	1	999	99	999	9	30	40	99	99	99	99	9	9	9	9	9	9	0	9	5
300823	201902288208	18375218530	39	20190228	22:52:05	2254	3	18	1001	1001	999999999999999	999999999999999	117	1	1	9	10	1	1	0	90	2	85	2	21	12	1	43	1	1	64	1	999	1	31	40	99	99	99	99	1	1	2	2	2	1	9	2	2
300808	201902288353	13833467881	18	20190228	18:54:36	3932	2	18	1001	1001	999999999999999	999999999999999	401	1	6	5	16	1	1	0	75	1	0	1	23	16	1	52	50	1	83	0	999	1	32	40	99	99	99	99	1	2	2	2	2	1	5	2	2
300768	201902288420	18506220157	24	20190228	07:22:26	2578	2	18	1001	1001	999999999999999	999999999999999	409	1	6	5	12	5	3	30	35	2	75	1	20	14	1	70	50	1	89	0	999	3	32	40	99	99	99	99	1	1	2	2	1	2	8	2	2
300814	201902289360	17837088188	19	20190228	21:19:44	1229	1	18	1001	1001	999999999999999	999999999999999	117	1	6	9	11	5	2	999	999	2	999	2	27	99	1	52	50	1	999	99	999	9	99	99	99	99	99	99	9	9	9	9	9	9	999	9	4
300786	201902289388	19991036587	32	20190228	14:02:47	3508	1	18	1001	1001	999999999999999	999999999999999	402	1	1	9	10	1	1	50	50	2	50	1	47	15	2	20	50	1	70	0	999	1	32	40	99	99	99	99	2	1	2	2	2	2	6	2	2
300901	201903010364	17845432784	10	20190301	18:57:37	3425	1	18	1001	1001	999999999999999	999999999999999	386	1	1	9	10	1	1	0	80	2	95	1	26	99	1	99	99	1	94	1	999	1	32	40	99	99	99	99	1	1	2	2	2	1	9	1	2
300891	201903010378	15003668702	29	20190301	14:26:27	3742	1	18	1001	1001	999999999999999	999999999999999	332	1	1	9	10	1	1	85	85	1	0	2	35	16	2	38	50	1	47	0	999	1	32	40	99	99	99	99	2	1	2	2	2	1	4	3	2
300842	201903010478	13831293198	18	20190301	06:04:51	2338	1	14	1001	1001	999999999999999	999999999999999	412	1	6	9	11	5	2	0	100	2	85	1	55	16	2	38	50	1	87	0	999	1	32	40	99	99	99	99	1	2	2	2	2	1	6	3	2
300831	201903010962	15503921556	19	20190301	00:58:52	3863	1	18	1001	1001	999999999999999	999999999999999	401	1	1	9	10	1	1	0	100	5	100	2	21	16	1	52	5	1	81	4	999	1	32	40	99	99	99	99	1	1	2	2	2	2	11	2	2
300888	201903011087	18636638875	31	20190301	14:23:50	3499	1	18	1001	1001	999999999999999	999999999999999	336	1	1	9	10	1	1	999	999	1	999	2	33	16	2	20	50	1	999	99	999	9	99	99	99	99	99	99	9	9	9	9	9	9	999	9	4
300876	201903011130	17788586698	39	20190301	12:44:48	2994	1	15	1001	1001	999999999999999	999999999999999	336	1	1	9	10	1	1	85	95	1	0	1	19	13	1	70	1	1	26	0	999	1	30	40	99	99	99	99	2	1	2	2	2	2	3	3	2
300880	201903011883	17876977037	14	20190301	12:18:14	3640	1	18	1001	1001	999999999999999	999999999999999	332	1	5	9	16	1	5	10	100	2	100	1	48	12	2	52	50	1	89	0	999	1	32	40	99	99	99	99	2	2	1	2	2	2	5	3	2
300859	201903012136	18178779484	15	20190301	10:02:45	3725	2	18	1001	1001	999999999999999	999999999999999	332	1	6	5	11	1	1	30	80	2	50	1	32	16	1	39	50	1	65	0	999	1	32	40	99	99	99	99	1	2	2	2	2	2	5	3	2
300903	201903012192	18049267921	32	20190301	19:57:26	2872	1	18	1001	1001	999999999999999	999999999999999	404	1	1	9	10	1	1	999	85	2	80	1	28	16	7	38	50	1	67	0	999	1	32	40	99	99	99	99	1	1	1	2	2	2	7	2	2
300856	201903012717	17798098045	18	20190301	09:32:06	2602	1	11	1001	1001	999999999999999	999999999999999	391	1	1	9	10	1	1	35	65	2	50	1	27	15	1	52	50	1	999	99	999	9	99	99	99	99	99	99	9	9	9	9	9	9	999	9	3
300857	201903012769	13116271530	14	20190301	09:58:27	3399	1	11	1001	1001	999999999999999	999999999999999	396	1	2	9	24	1	1	15	100	2	50	2	20	8	1	52	3	1	69	2	999	1	32	40	99	99	99	99	1	1	2	2	2	1	9	2	2
300847	201903012838	17097883292	12	20190301	08:09:35	2427	1	18	1001	1001	999999999999999	999999999999999	396	1	1	9	10	1	1	0	95	2	95	2	50	9	2	21	50	1	88	0	999	1	32	40	99	99	99	99	1	2	2	2	2	2	5	2	2
300830	201903012843	15986026837	14	20190301	00:37:27	963	1	99	1001	1001	999999999999999	999999999999999	117	1	9	9	99	9	9	999	999	2	999	2	18	11	1	70	99	1	999	99	999	9	99	99	99	99	99	99	9	9	9	9	9	9	999	9	4
300837	201903012878	19901786386	10	20190301	04:15:00	1125	1	18	1001	1001	999999999999999	999999999999999	412	1	1	9	10	1	1	60	100	1	0	2	19	12	1	70	70	1	69	0	999	1	32	40	99	99	99	99	9	9	9	9	9	9	1	9	5
300863	201903013214	18865151159	30	20190301	10:45:47	1184	2	18	1001	1001	999999999999999	999999999999999	390	1	9	9	99	9	9	999	999	2	999	2	24	16	1	38	50	1	999	99	999	9	99	99	99	99	99	99	9	9	9	9	9	9	999	9	4
300882	201903013947	18502706843	21	20190301	14:21:50	1665	1	18	1001	1001	999999999999999	999999999999999	396	1	6	7	11	1	1	0	25	2	999	1	28	12	2	52	5	1	999	99	999	9	99	99	99	99	99	99	9	9	9	9	9	9	999	9	3
300892	201903014129	15591473891	32	20190301	15:32:19	1683	1	18	1001	1001	999999999999999	999999999999999	387	1	1	9	10	1	1	10	95	1	0	2	28	20	1	70	50	1	999	10	999	9	30	40	99	99	99	99	9	9	9	9	9	9	1	9	5
300866	201903014433	15518966361	19	20190301	10:49:28	3321	1	18	1001	1001	999999999999999	999999999999999	124	1	6	6	11	1	1	70	50	2	20	2	23	9	1	43	50	1	81	0	999	1	32	40	99	99	99	99	1	1	2	2	2	1	7	3	2
300844	201903014990	15615959635	30	20190301	07:12:56	3455	1	14	1001	1001	999999999999999	999999999999999	412	1	1	9	10	1	1	50	85	2	999	2	23	15	1	70	50	1	52	3	999	1	31	40	99	99	99	99	1	1	2	2	2	1	9	3	2
300872	201903015395	18959266576	12	20190301	12:27:25	711	1	18	1001	1001	999999999999999	999999999999999	390	1	1	1	10	1	1	999	999	9	999	1	22	16	1	70	4	1	999	99	999	9	99	99	99	99	99	99	9	9	9	9	9	9	999	9	4
300861	201903015435	17350267801	10	20190301	10:03:58	2492	7	18	1001	1001	999999999999999	999999999999999	387	1	6	5	12	5	2	100	50	1	0	1	23	16	1	39	50	1	999	99	999	9	99	99	99	99	99	99	9	9	9	9	9	9	999	9	3
300858	201903015512	18019907090	11	20190301	08:36:12	3711	1	18	1001	1001	999999999999999	999999999999999	332	1	1	9	10	1	1	20	80	2	70	2	29	16	1	38	50	1	88	0	999	1	32	40	99	99	99	99	1	1	2	2	2	1	8	3	2
300874	201903016145	17721051535	33	20190301	12:39:55	3487	1	18	1001	1001	999999999999999	999999999999999	396	1	6	9	11	1	1	0	95	2	50	1	23	16	1	70	4	1	90	0	999	1	32	40	99	99	99	99	1	2	2	2	2	2	5	2	2
300846	201903016169	17863908069	12	20190301	08:07:14	3459	1	18	1001	1001	999999999999999	999999999999999	390	1	5	9	26	1	1	90	70	2	20	2	20	15	1	70	50	1	60	0	999	1	31	40	99	99	99	99	1	2	2	2	2	1	5	3	2
300841	201903016573	13908502658	16	20190301	05:05:41	1742	2	18	1001	1001	999999999999999	999999999999999	117	1	6	9	12	5	4	30	60	2	60	2	27	14	1	52	50	1	999	99	999	9	99	99	99	99	99	99	9	9	9	9	9	9	999	9	4
300845	201903016882	2984588665	32	20190301	07:19:46	1967	2	16	1001	1001	999999999999999	999999999999999	316	1	6	9	11	1	5	60	50	2	30	2	76	6	2	60	50	1	46	0	999	4	32	40	99	99	99	99	2	2	1	2	2	2	5	3	2
300894	201903017074	18038586088	14	20190301	16:04:21	3639	1	18	1001	1001	999999999999999	999999999999999	386	1	1	9	10	1	1	20	20	1	0	1	33	15	2	88	50	1	53	0	999	1	30	40	99	99	99	99	1	1	2	2	1	2	6	2	2
300895	201903017993	18830356826	18	20190301	16:15:16	3596	1	18	1001	1001	999999999999999	999999999999999	404	1	1	9	10	1	1	95	65	1	0	1	25	18	1	70	50	1	16	0	999	1	30	40	99	99	99	99	1	2	2	2	2	1	3	2	2
300834	201903018044	18811136658	10	20190301	02:41:32	3544	1	18	1001	1001	999999999999999	999999999999999	401	1	1	9	10	1	1	20	80	2	60	2	24	19	1	70	50	1	83	99	999	1	32	40	99	99	99	99	1	1	2	1	1	1	10	2	2
300850	201903018579	18039021831	12	20190301	08:07:37	3577	1	18	1001	1001	999999999999999	999999999999999	391	1	1	9	10	1	1	40	80	2	70	2	18	12	1	70	50	1	58	0	999	1	32	40	99	99	99	99	1	1	2	1	2	1	9	3	2
300869	201903018717	18321622497	33	20190301	11:37:11	3559	1	18	1001	1001	999999999999999	999999999999999	387	1	1	9	10	1	1	90	80	2	80	2	28	16	1	35	5	1	60	0	999	3	32	40	99	99	99	99	1	2	2	2	2	2	5	3	2
300896	201903018962	13734018320	31	20190301	16:30:02	3610	1	18	1001	1001	999999999999999	999999999999999	402	1	6	5	11	1	1	20	100	2	50	1	23	16	1	70	50	1	90	0	999	1	32	40	99	99	99	99	1	1	1	2	2	2	8	2	2
300849	201903018994	15092386950	30	20190301	08:14:00	3611	1	18	1001	1001	999999999999999	999999999999999	387	1	1	9	10	1	1	20	50	6	80	1	21	15	1	35	50	1	59	2	999	1	32	40	99	99	99	99	1	1	2	2	2	1	9	3	2
300836	201903019022	13811428550	10	20190301	03:16:29	2362	2	18	1001	1001	999999999999999	999999999999999	412	1	6	9	11	1	1	999	100	2	999	1	30	16	1	35	11	1	999	99	999	9	99	99	99	99	99	99	9	9	9	9	9	9	999	9	3
300906	201903019431	17802598977	24	20190301	22:36:20	2878	1	18	1001	1001	999999999999999	999999999999999	386	1	1	9	10	1	1	60	95	2	70	1	24	16	1	88	50	1	68	0	999	1	31	40	99	99	99	99	1	1	2	2	2	1	7	2	2
300884	201903019940	15860833361	12	20190301	14:45:32	4255	1	18	1001	1001	999999999999999	999999999999999	390	1	5	9	26	1	1	50	100	2	70	1	23	16	1	52	3	1	81	0	999	1	32	40	99	99	99	99	1	1	2	1	2	2	8	3	2
300981	201903020248	13086938060	16	20190302	19:12:48	3575	1	18	1001	1001	999999999999999	999999999999999	336	1	1	9	10	1	1	25	60	1	0	1	20	14	1	70	2	1	26	0	999	1	30	40	99	99	99	99	2	2	2	2	2	2	2	3	2
300989	201903020704	13984539687	16	20190302	20:37:33	2910	1	18	1001	1001	999999999999999	999999999999999	315	1	1	9	10	1	1	60	20	1	0	1	47	15	2	35	50	1	53	0	999	1	32	40	99	99	99	99	1	2	2	2	2	2	3	3	2
300936	201903021049	15960273012	12	20190302	09:23:50	1948	3	18	1001	1001	999999999999999	999999999999999	388	1	5	9	24	1	1	999	999	1	0	1	30	12	1	88	60	1	999	99	999	9	99	99	99	99	99	99	9	9	9	9	9	9	999	9	3
300950	201903021131	13531993109	14	20190302	13:03:08	3586	2	18	1001	1001	18128328626	999999999999999	388	1	6	9	11	1	1	5	100	2	70	2	22	15	1	38	50	1	66	5	999	1	31	40	99	99	99	99	2	1	2	2	1	2	8	3	2
300953	201903021402	18095180381	28	20190302	13:42:36	729	5	18	1001	1001	999999999999999	999999999999999	411	1	1	9	10	1	1	999	999	9	999	1	48	16	2	52	50	1	999	99	999	9	99	99	99	99	99	99	9	9	9	9	9	9	999	9	4
300960	201903021517	19932658255	18	20190302	14:25:00	1603	1	18	1001	1001	999999999999999	999999999999999	409	1	1	9	10	1	1	25	85	2	50	1	37	9	2	88	3	1	81	0	999	1	32	40	99	99	99	99	9	9	9	9	9	9	2	9	5
300919	201903022485	7737511670	15	20190302	00:58:13	3446	2	18	1001	1001	999999999999999	999999999999999	386	1	6	9	11	1	1	50	60	2	40	2	28	16	1	44	50	1	63	0	999	1	30	40	99	99	99	99	1	1	1	2	2	2	8	2	2
300927	201903022618	14795880402	15	20190302	04:52:36	5115	6	18	1001	1001	18477351215	999999999999999	404	1	7	6	11	1	1	0	100	4	90	1	18	10	1	70	50	1	94	2	999	1	32	40	99	99	99	99	1	2	2	1	1	1	9	2	2
300962	201903023101	17673765772	22	20190302	15:17:27	917	1	18	1001	1001	999999999999999	999999999999999	409	1	6	9	11	1	1	60	30	1	0	2	22	15	1	70	3	1	999	99	999	9	99	99	99	99	99	99	9	9	9	9	9	9	999	9	3
300941	201903023304	18715021456	39	20190302	09:41:35	3669	1	18	1001	1001	999999999999999	999999999999999	391	1	6	7	12	5	3	0	97	3	94	1	22	10	1	52	60	1	98	0	999	1	32	40	99	99	99	99	2	2	2	1	2	1	6	3	2
300993	201903023536	15612142400	18	20190302	21:31:25	3668	1	18	1001	1001	999999999999999	999999999999999	336	1	1	9	10	1	1	0	0	2	100	2	22	14	1	70	2	1	70	0	999	1	32	40	99	99	99	99	1	1	2	2	2	2	6	2	2
300992	201903023555	15926701136	21	20190302	21:01:59	1645	1	18	1001	1001	999999999999999	999999999999999	403	1	5	9	26	1	1	10	0	1	0	1	18	12	1	70	50	1	999	0	999	9	30	40	99	99	99	99	9	9	9	9	9	9	0	9	5
300923	201903023979	15161807725	24	20190302	02:37:26	1619	1	18	1001	1001	999999999999999	999999999999999	386	1	1	9	10	1	1	30	40	1	0	2	20	12	1	99	50	1	47	20	999	1	31	40	99	99	99	99	2	2	2	2	2	2	2	2	2
300979	201903024343	18752517665	24	20190302	18:07:12	786	1	18	1001	1001	999999999999999	999999999999999	387	1	6	9	11	5	2	999	999	2	999	1	22	16	1	38	50	1	999	99	999	9	99	99	99	99	99	99	9	9	9	9	9	9	999	9	4
300943	201903024527	15731635672	18	20190302	10:14:45	3822	1	13	1001	1001	999999999999999	999999999999999	388	1	6	9	11	1	1	20	90	1	0	1	28	9	2	52	7	1	67	1	999	1	30	40	99	99	99	99	1	1	2	1	1	1	10	3	2
300948	201903024694	15857395339	39	20190302	11:46:54	2873	1	18	1001	1001	999999999999999	999999999999999	391	1	1	9	10	1	1	999	90	2	999	1	23	16	1	38	50	1	65	0	999	1	32	40	99	99	99	99	2	2	2	2	2	1	4	3	2
300942	201903024855	15890858275	19	20190302	10:34:02	624	1	18	1001	1001	999999999999999	999999999999999	332	1	9	9	99	9	9	999	999	2	999	1	25	7	2	42	50	1	999	99	999	9	99	99	99	99	99	99	9	9	9	9	9	9	999	9	4
300997	201903025074	15168836703	30	20190302	22:12:15	3629	1	18	1001	1001	999999999999999	999999999999999	403	1	1	1	10	1	1	35	85	1	0	2	21	16	1	38	50	1	66	0	999	1	31	40	99	99	99	99	2	2	2	1	2	2	4	2	2
300920	201903025512	18877108955	15	20190302	01:27:54	3571	1	18	1001	1001	999999999999999	999999999999999	360	1	6	9	11	1	1	70	0	1	0	2	45	16	2	38	50	1	33	0	999	1	31	40	99	99	99	99	1	2	2	2	2	1	2	3	2
300985	201903025624	15062725808	24	20190302	19:25:43	4346	1	18	1001	1001	999999999999999	999999999999999	387	1	1	9	10	1	1	0	100	4	95	1	26	16	1	39	50	1	88	0	999	1	32	40	99	99	99	99	2	1	2	2	2	1	10	3	2
300980	201903025884	13820869607	35	20190302	18:41:09	1337	1	18	1001	1001	999999999999999	999999999999999	387	1	1	9	10	1	1	5	100	2	70	1	31	9	1	52	50	1	999	99	999	9	99	99	99	99	99	99	9	9	9	9	9	9	999	9	3
300934	201903026033	15913217155	14	20190302	08:22:16	3130	1	18	1001	1001	999999999999999	999999999999999	409	1	2	9	10	1	1	30	100	2	80	2	21	15	1	38	5	1	76	0	999	1	32	40	99	99	99	99	1	2	2	1	2	2	6	2	2
300967	201903026532	15617133309	19	20190302	16:02:19	2935	1	18	1001	1001	999999999999999	999999999999999	336	1	1	9	10	1	1	60	100	1	0	1	19	14	1	70	50	1	49	0	999	1	30	40	99	99	99	99	2	1	2	2	2	2	3	3	2
300964	201903026552	15937290750	19	20190302	14:57:19	3765	1	18	1001	1001	999999999999999	999999999999999	391	1	1	9	10	1	1	0	100	5	75	2	26	12	2	35	50	1	68	0	999	1	31	40	99	99	99	99	1	2	2	2	2	2	8	3	2
300918	201903027756	15179987022	14	20190302	00:18:14	1909	1	18	1001	1001	999999999999999	999999999999999	360	1	1	9	10	1	1	100	999	1	0	2	25	16	1	35	1	1	999	99	999	9	99	99	99	99	99	99	9	9	9	9	9	9	999	9	3
300969	201903028830	13325028927	30	20190302	16:23:03	3711	1	18	1001	1001	999999999999999	999999999999999	315	1	1	9	10	1	1	13	88	2	60	2	23	15	1	38	50	1	60	0	999	1	32	40	99	99	99	99	2	2	2	2	2	1	5	3	2
300970	201903029271	18363269983	30	20190302	16:08:20	2023	1	18	1001	1001	999999999999999	999999999999999	387	1	1	9	10	1	1	0	999	2	20	2	23	7	1	21	50	1	999	0	999	9	30	40	99	99	99	99	9	9	9	9	9	9	1	9	5
300940	201903029445	13321285646	13	20190302	10:19:37	3594	1	18	1001	1001	999999999999999	999999999999999	406	1	1	1	10	1	1	0	80	2	60	2	26	18	1	52	20	1	62	0	999	1	30	40	99	99	99	99	1	2	1	1	1	1	9	2	2
300959	201903029697	17515072109	30	20190302	14:17:21	1352	1	18	1001	1001	999999999999999	999999999999999	391	1	1	9	10	1	1	10	80	2	80	2	18	12	1	70	50	1	999	99	999	9	99	99	99	99	99	99	9	9	9	9	9	9	999	9	3
300954	201903029978	13126967766	10	20190302	13:50:21	3397	1	18	1001	1001	999999999999999	999999999999999	406	1	1	1	10	1	1	60	30	1	0	1	22	15	1	70	3	1	19	0	999	1	30	40	99	99	99	99	2	2	2	2	2	1	1	2	2
301066	201903030110	18393915065	13	20190303	15:03:41	3688	1	18	1001	1001	999999999999999	999999999999999	383	1	6	9	11	5	2	55	80	1	0	1	25	16	1	52	50	1	80	0	999	1	32	40	99	99	99	99	2	1	2	2	2	1	5	3	2
301037	201903031069	15621463378	30	20190303	09:19:06	3624	1	18	1001	1001	999999999999999	999999999999999	389	1	6	9	24	1	1	20	5	1	0	2	21	13	1	70	2	1	28	0	999	1	30	40	99	99	99	99	1	1	2	2	2	2	4	2	2
301025	201903031245	13421115386	14	20190303	09:07:08	3699	1	10	1001	1001	999999999999999	999999999999999	408	1	1	9	10	1	1	100	90	2	75	1	39	9	2	21	50	1	76	0	999	1	32	40	99	99	99	99	1	1	2	2	2	1	7	3	2
301018	201903031764	13567537659	39	20190303	07:26:33	2747	1	18	1001	1001	999999999999999	999999999999999	387	1	2	9	24	1	1	30	50	6	50	1	29	9	1	52	50	1	80	5	999	1	32	40	99	99	99	99	1	1	2	2	2	2	8	1	2
301069	201903032221	13145357762	30	20190303	15:20:28	2723	1	18	1001	1001	999999999999999	999999999999999	408	1	1	9	10	1	1	75	85	2	60	1	18	9	1	70	50	1	67	1	999	1	30	40	99	99	99	99	2	1	2	2	2	1	7	2	2
301082	201903032336	18013452666	24	20190303	17:34:12	3159	1	18	1001	1001	999999999999999	999999999999999	411	1	1	9	10	1	1	50	90	7	25	2	24	16	2	44	50	1	86	1	999	1	32	40	99	99	99	99	2	2	2	2	2	1	9	3	2
301042	201903032642	15738998600	19	20190303	10:43:33	2495	1	18	1001	1001	999999999999999	999999999999999	406	1	1	1	10	1	1	0	90	2	99	1	34	16	4	39	20	1	999	0	999	9	30	40	99	99	99	99	9	9	9	9	9	9	1	9	5
301077	201903033845	13131133138	18	20190303	17:01:42	3406	1	18	1001	1001	999999999999999	999999999999999	412	1	1	9	10	1	1	100	100	2	100	2	29	9	1	38	50	1	98	0	999	1	32	40	99	99	99	99	1	1	2	2	1	2	7	3	2
301078	201903034133	18646098549	10	20190303	16:29:36	3741	1	18	1001	1001	999999999999999	999999999999999	332	1	6	5	23	1	1	50	80	2	65	2	24	16	1	70	70	1	76	0	999	1	32	40	99	99	99	99	2	2	2	2	2	2	4	3	2
301020	201903034225	13308627327	21	20190303	08:02:15	2709	1	18	1001	1001	999999999999999	999999999999999	408	1	1	9	10	1	1	25	999	2	90	2	22	12	1	52	10	1	49	0	999	1	31	40	99	99	99	99	2	1	2	2	2	2	4	3	2
301050	201903034496	15136377653	19	20190303	12:32:30	1493	1	18	1001	1001	999999999999999	999999999999999	401	1	1	9	10	1	1	60	40	1	0	2	22	16	1	42	50	1	999	99	999	9	99	99	99	99	99	99	9	9	9	9	9	9	999	9	5
301092	201903034757	13037460093	22	20190303	23:08:20	3559	1	18	1001	1001	999999999999999	999999999999999	411	1	1	9	10	1	1	50	60	1	0	1	18	13	1	70	50	1	35	0	999	1	30	40	99	99	99	99	1	1	2	2	2	1	6	3	2
301088	201903034886	15367826008	22	20190303	20:40:03	3656	11	18	1001	1001	999999999999999	999999999999999	332	1	6	5	16	1	1	95	15	1	0	1	36	16	1	44	60	1	22	4	999	1	30	40	99	99	99	99	2	2	2	1	2	2	2	2	2
301076	201903035012	15832935253	18	20190303	16:48:48	656	1	18	1001	1001	999999999999999	999999999999999	411	1	1	9	10	1	1	45	40	2	35	2	18	9	1	20	50	1	999	99	999	9	99	99	99	99	99	99	9	9	9	9	9	9	999	9	4
301058	201903035231	18993776885	13	20190303	13:23:17	4201	2	18	1001	1001	999999999999999	999999999999999	408	1	6	5	11	1	1	10	90	5	95	1	21	12	1	52	50	1	999	99	999	9	99	99	99	99	99	99	9	9	9	9	9	9	999	9	2
301021	201903035626	15105939813	12	20190303	08:08:42	3622	2	18	1001	1001	999999999999999	999999999999999	406	1	6	6	23	5	7	0	95	2	70	1	25	9	1	52	20	1	84	0	999	1	32	40	99	99	99	99	1	1	2	2	1	1	9	2	2
301010	201903035816	18578626831	14	20190303	04:09:00	3609	1	18	1001	1001	999999999999999	999999999999999	387	1	6	7	12	1	1	20	80	1	0	2	18	10	1	70	50	1	60	0	999	1	32	40	99	99	99	99	1	1	2	2	2	2	6	1	2
301033	201903036154	18227691890	34	20190303	09:50:47	3641	1	18	1001	1001	999999999999999	999999999999999	388	1	1	9	10	1	1	60	85	1	0	1	18	9	1	38	1	1	50	1	999	1	30	40	99	99	99	99	1	1	2	2	2	2	6	3	2
301056	201903037324	13031056227	10	20190303	12:15:09	3689	1	18	1001	1001	999999999999999	999999999999999	389	1	1	9	10	1	1	60	85	1	0	1	24	17	1	70	6	1	50	0	999	1	31	40	99	99	99	99	2	2	2	2	2	1	3	2	2
301039	201903037492	13664418052	23	20190303	10:29:29	2889	1	18	1001	1001	999999999999999	999999999999999	383	1	1	9	10	1	1	0	99	1	0	2	30	12	2	38	50	1	0	0	999	1	30	40	99	99	99	99	1	1	2	2	2	2	5	3	2
301053	201903038007	18310057309	18	20190303	12:36:48	1303	1	18	1001	1001	999999999999999	999999999999999	383	1	1	9	10	1	1	65	999	2	999	2	26	16	2	38	60	1	999	0	999	9	30	40	99	99	99	99	9	9	9	9	9	9	1	9	5
301026	201903038440	18156507113	11	20190303	09:15:10	3690	1	18	1001	1001	999999999999999	999999999999999	401	1	1	9	10	1	1	20	90	2	65	2	38	16	2	38	50	1	76	1	999	1	32	40	99	99	99	99	1	1	2	2	1	1	10	2	2
301089	201903039272	13194105241	26	20190303	22:12:00	2198	1	18	1001	1001	999999999999999	999999999999999	412	1	1	9	10	1	1	30	90	1	0	2	18	10	1	70	50	1	52	1	999	1	30	40	99	99	99	99	1	2	2	2	2	1	6	3	2
301081	201903039936	17784385742	40	20190303	18:21:00	3641	1	11	1001	1001	999999999999999	999999999999999	412	1	6	9	11	1	1	0	999	1	0	1	20	14	1	70	50	1	90	3	999	1	32	40	99	99	99	99	1	1	2	2	2	2	7	3	2
301178	201903040177	13001955215	10	20190304	20:27:07	3339	1	18	1001	1001	999999999999999	999999999999999	388	1	1	9	10	1	1	70	50	2	30	1	18	11	1	70	50	1	47	0	999	1	30	40	99	99	99	99	1	2	2	2	2	2	3	3	2
301162	201903040210	18681869415	32	20190304	15:04:48	1319	1	18	1001	1001	999999999999999	999999999999999	408	1	1	9	10	1	1	999	90	2	999	2	30	12	2	38	50	1	999	99	999	9	99	99	99	99	99	99	9	9	9	9	9	9	999	9	3
301118	201903040404	15079466757	25	20190304	09:08:33	3678	1	11	1001	1001	999999999999999	999999999999999	401	1	1	9	10	1	1	50	80	1	0	1	19	12	1	52	50	1	72	0	999	1	32	40	99	99	99	99	1	2	2	2	2	1	6	2	2
301117	201903040541	18463026526	35	20190304	09:08:40	1951	1	18	1001	1001	999999999999999	999999999999999	383	1	1	9	10	1	1	20	85	2	70	2	25	16	1	38	70	1	61	0	999	1	30	40	99	99	99	99	1	1	1	2	2	1	9	3	2
301107	201903040576	13844241859	23	20190304	07:19:24	2362	1	18	1001	1001	999999999999999	999999999999999	391	1	5	9	26	1	1	60	95	1	0	1	18	12	1	70	50	1	57	0	999	1	32	40	99	99	99	99	1	1	1	1	2	1	8	3	2
301169	201903040609	18613667108	24	20190304	17:29:59	1470	1	18	1001	1001	999999999999999	999999999999999	406	1	5	5	10	1	1	60	50	2	50	2	23	11	1	70	60	1	27	0	999	1	30	40	99	99	99	99	2	1	2	2	2	2	3	2	2
301100	201903040677	13795368835	39	20190304	02:30:27	3651	1	18	1001	1001	999999999999999	999999999999999	332	1	1	9	10	1	1	40	90	2	30	1	18	10	1	88	60	1	45	0	999	1	30	40	99	99	99	99	1	1	2	2	2	1	7	3	2
301185	201903040905	18339019138	14	20190304	21:21:55	2784	1	18	1001	1001	999999999999999	999999999999999	389	1	1	9	10	1	1	65	75	1	50	2	21	12	1	38	70	1	57	0	999	1	30	40	99	99	99	99	1	1	2	1	2	1	8	2	2
301172	201903040980	17600272688	10	20190304	16:47:29	3623	1	18	1001	1001	999999999999999	999999999999999	388	1	1	9	10	1	1	50	50	2	65	1	25	15	1	52	4	1	63	1	999	1	32	40	99	99	99	99	2	2	2	2	2	2	5	3	2
301110	201903041115	19982335563	34	20190304	07:06:00	3555	1	18	1001	1001	999999999999999	999999999999999	411	1	6	5	11	1	1	10	80	2	70	1	20	12	1	35	50	1	80	999	999	1	32	40	99	99	99	99	1	1	2	1	2	1	10	3	2
301145	201903041330	13401673012	24	20190304	12:57:06	3694	1	18	1001	1001	999999999999999	999999999999999	377	1	5	9	24	1	1	90	100	1	0	1	30	15	2	39	50	1	25	0	999	1	30	40	99	99	99	99	1	2	2	1	2	2	3	2	2
301134	201903041503	18888218166	30	20190304	10:18:32	4108	1	18	1001	1001	999999999999999	999999999999999	401	1	6	9	11	1	1	1	999	1	0	1	19	13	1	70	1	1	78	0	999	1	32	40	99	99	99	99	1	1	2	2	1	1	9	2	2
301095	201903041933	18779879801	25	20190304	01:13:33	3262	1	12	1001	1001	999999999999999	999999999999999	332	1	1	9	10	1	1	0	100	2	80	2	24	16	1	52	50	1	999	999	999	9	30	40	99	99	99	99	9	9	9	9	9	9	1	9	5
301184	201903042202	17346667616	25	20190304	22:11:42	3946	1	18	1001	1001	999999999999999	999999999999999	388	1	1	9	10	1	1	999	100	2	89	1	35	12	4	52	6	1	81	0	999	1	32	40	99	99	99	99	1	1	2	1	1	1	9	3	2
301124	201903042800	13810526410	10	20190304	09:51:01	3637	3	18	1001	1001	999999999999999	999999999999999	408	1	6	5	16	5	5	55	80	1	0	2	36	16	1	38	10	1	69	0	999	1	30	40	99	99	99	99	2	2	2	2	2	2	2	2	2
301136	201903042836	15963372152	30	20190304	11:58:54	3592	1	11	1001	1001	999999999999999	999999999999999	408	1	6	9	11	1	1	999	100	2	999	1	23	16	1	20	50	1	74	20	999	1	30	40	99	99	99	99	1	1	2	1	1	2	9	3	2
301149	201903043044	15143557621	23	20190304	14:32:36	3565	1	18	1001	1001	999999999999999	999999999999999	401	1	1	9	10	1	1	15	100	2	50	1	23	16	1	52	60	1	94	0	999	1	32	40	99	99	99	99	1	1	2	2	2	2	7	2	2
301141	201903043262	18165620146	14	20190304	12:58:27	3016	1	18	1001	1001	999999999999999	999999999999999	396	1	1	9	10	1	1	30	85	1	0	2	28	12	1	52	50	1	40	0	999	1	30	40	99	99	99	99	1	2	2	2	2	1	4	2	2
301151	201903043447	13387702215	15	20190304	14:38:01	648	1	18	1001	1001	999999999999999	999999999999999	383	1	1	9	10	1	1	0	75	2	50	2	18	12	1	88	50	1	999	99	999	9	99	99	99	99	99	99	9	9	9	9	9	9	999	9	4
301135	201903043510	13920561071	35	20190304	10:50:56	1708	1	18	1001	1001	999999999999999	999999999999999	383	1	1	9	10	1	1	50	75	1	0	2	27	16	1	40	50	1	62	0	999	4	32	40	99	99	99	99	1	2	2	2	2	2	5	3	2
301133	201903043781	18779118026	14	20190304	10:18:53	3565	1	18	1001	1001	999999999999999	999999999999999	396	1	1	9	10	1	1	10	100	2	45	1	21	15	1	38	2	1	66	1	999	1	30	40	99	99	99	99	1	1	2	2	2	2	8	2	2
301174	201903044367	18837881566	19	20190304	18:15:13	3620	1	18	1001	1001	999999999999999	999999999999999	389	1	6	9	11	1	1	20	100	2	40	1	24	16	1	52	50	1	85	6	999	3	32	40	99	99	99	99	1	1	2	2	1	1	11	2	2
301121	201903044564	15361525815	19	20190304	09:23:28	682	1	99	1001	1001	999999999999999	999999999999999	408	1	9	9	99	9	9	999	999	9	999	1	30	99	2	99	50	1	999	99	999	9	99	99	99	99	99	99	9	9	9	9	9	9	999	9	4
301138	201903044893	15201605951	10	20190304	12:10:15	5464	1	18	1001	1001	999999999999999	999999999999999	383	1	5	9	24	1	1	0	100	5	95	1	25	16	1	38	7	1	86	0	999	5	31	40	99	99	99	99	2	2	2	2	2	2	8	3	2
301140	201903045042	15107036275	25	20190304	12:33:02	3493	1	18	1001	1001	999999999999999	999999999999999	410	1	1	9	10	1	1	60	65	3	999	1	19	11	1	70	5	1	76	99	999	1	32	40	99	99	99	99	1	2	2	1	1	1	7	3	2
301111	201903045048	18185650165	10	20190304	08:12:57	3054	5	13	1001	1001	999999999999999	999999999999999	383	1	6	7	11	1	1	55	90	2	80	2	35	8	4	52	50	1	88	0	999	1	32	40	99	99	99	99	1	2	2	1	2	2	5	3	2
301116	201903045124	18518648232	10	20190304	08:50:35	2221	1	18	1001	1001	999999999999999	999999999999999	396	1	3	9	26	1	1	25	100	2	90	1	31	20	2	38	12	1	999	99	999	9	99	99	99	99	99	99	9	9	9	9	9	9	999	9	3
301159	201903045727	13227507513	21	20190304	15:13:02	2508	1	18	1001	1001	999999999999999	999999999999999	383	1	1	9	10	1	1	999	90	2	90	1	18	12	1	70	50	1	69	1	999	1	30	40	99	99	99	99	2	2	2	1	2	1	6	3	2
301175	201903045811	18270707327	25	20190304	20:10:13	2910	1	18	1001	1001	999999999999999	999999999999999	406	1	1	1	10	1	1	30	80	2	50	2	29	9	1	35	8	1	65	0	999	1	30	40	99	99	99	99	1	2	2	2	1	2	6	2	2
301120	201903045908	15205861065	39	20190304	08:29:13	3777	2	18	1001	1001	999999999999999	999999999999999	377	1	6	9	11	5	2	10	87	6	90	1	20	9	1	35	50	1	63	9	999	1	30	40	99	99	99	99	1	1	2	2	1	1	13	2	2
301192	201903047470	18867524214	39	20190304	23:23:36	3663	1	18	1001	1001	999999999999999	999999999999999	389	1	6	5	16	1	1	30	85	2	50	1	31	16	4	38	70	1	67	0	999	1	32	40	99	99	99	99	1	1	2	2	1	1	9	2	2
301101	201903047551	18915385526	24	20190304	03:28:00	3679	1	18	1001	1001	999999999999999	999999999999999	391	1	1	9	10	1	1	30	7	2	999	1	33	11	4	35	50	1	66	0	999	1	32	40	99	99	99	99	1	2	1	2	2	2	6	3	2
301114	201903048156	15853215042	30	20190304	08:24:23	3134	1	18	1001	1001	999999999999999	999999999999999	408	1	6	9	11	5	2	30	90	2	50	1	26	15	1	52	1	1	55	0	999	1	30	40	99	99	99	99	2	1	2	2	2	2	6	3	2
301113	201903048250	13534927033	14	20190304	08:24:19	2673	1	18	1001	1001	999999999999999	999999999999999	410	1	1	9	10	1	1	50	50	2	20	1	20	6	1	35	50	1	24	0	999	1	31	40	99	99	99	99	1	2	2	1	2	2	5	3	2
301108	201903048579	13820502931	35	20190304	08:00:46	2165	1	99	1001	1001	999999999999999	999999999999999	396	1	1	9	10	1	1	10	90	2	70	1	19	10	1	38	6	1	999	1	999	9	30	40	99	99	99	99	9	9	9	9	9	9	2	9	5
301143	201903048824	17677035454	10	20190304	13:16:48	896	1	11	1001	1001	999999999999999	999999999999999	408	1	9	9	99	9	9	999	999	2	10	2	19	11	1	70	99	1	999	99	999	9	99	99	99	99	99	99	9	9	9	9	9	9	999	9	4
301144	201903049040	13525371456	19	20190304	13:47:16	2867	1	11	1001	1001	999999999999999	999999999999999	408	1	1	9	10	1	1	100	70	1	0	2	27	13	2	52	50	1	64	0	999	1	32	40	99	99	99	99	1	1	2	2	2	2	5	3	2
301165	201903049399	13699115791	10	20190304	16:08:47	3684	4	15	1001	1001	999999999999999	999999999999999	406	1	2	2	10	1	1	60	70	2	20	1	30	15	1	38	8	1	92	0	999	1	32	40	99	99	99	99	1	1	2	2	1	1	8	2	2
301131	201903049772	15876751235	14	20190304	09:57:04	5553	1	18	1001	1001	999999999999999	999999999999999	410	1	1	9	10	1	1	999	70	2	50	1	22	15	1	52	3	1	90	2	999	1	32	40	99	99	99	99	1	2	1	2	2	2	6	3	2
301201	201903050066	15766636989	14	20190305	07:15:17	3039	1	18	1001	1001	999999999999999	999999999999999	406	1	1	1	10	1	1	50	80	2	50	2	20	12	1	52	20	1	65	0	999	1	32	40	99	99	99	99	1	2	2	1	2	1	7	2	2
301199	201903050395	16674260329	22	20190305	06:08:18	3373	1	18	1001	1001	999999999999999	999999999999999	388	1	6	9	11	1	1	999	999	7	999	1	38	99	4	52	50	1	999	99	999	9	99	99	99	99	99	99	9	9	9	9	9	9	999	9	4
301290	201903050625	15136970976	19	20190305	23:27:44	948	1	14	1001	1001	999999999999999	999999999999999	401	1	1	9	10	1	1	100	50	1	0	2	18	12	1	70	50	1	999	0	999	9	30	40	99	99	99	99	9	9	9	9	9	9	0	9	5
301235	201903051251	15190188733	39	20190305	12:49:10	3452	1	18	1001	1001	999999999999999	999999999999999	396	1	1	9	10	1	1	30	80	1	0	1	30	9	2	99	3	1	73	1	999	1	32	40	99	99	99	99	1	2	2	2	2	2	5	2	2
301280	201903051814	13651262896	10	20190305	18:36:28	2605	1	13	1001	1001	999999999999999	999999999999999	383	1	1	9	10	1	1	0	80	2	70	1	48	15	2	38	50	1	999	99	999	9	99	99	99	99	99	99	9	9	9	9	9	9	999	9	3
301287	201903052182	13583262027	14	20190305	21:39:29	3699	1	18	1001	1001	999999999999999	999999999999999	383	1	1	9	10	1	1	15	100	2	90	1	18	13	1	70	70	1	63	0	999	1	31	40	99	99	99	99	2	1	2	1	1	1	9	3	2
301194	201903052676	18338268672	21	20190305	01:09:14	2991	1	18	1001	1001	999999999999999	999999999999999	389	1	1	9	10	1	1	50	100	2	30	2	22	12	1	44	4	1	71	0	999	1	31	40	99	99	99	99	1	1	2	1	1	1	10	2	2
301208	201903052899	18753485656	30	20190305	08:18:54	673	1	18	1001	1001	999999999999999	999999999999999	360	1	1	9	10	1	1	999	999	9	999	1	23	16	1	52	50	1	999	99	999	9	99	99	99	99	99	99	9	9	9	9	9	9	999	9	4
301223	201903052962	19939131089	19	20190305	10:32:41	1999	3	18	1001	1001	999999999999999	999999999999999	360	1	1	9	10	1	1	50	90	1	0	1	44	14	2	44	50	1	42	0	999	1	30	40	99	99	99	99	1	2	2	2	2	2	2	3	6
301238	201903053263	17737703056	19	20190305	11:52:43	3610	1	18	1001	1001	999999999999999	999999999999999	124	1	1	1	10	1	1	25	75	2	50	2	25	10	1	52	50	1	86	0	999	1	32	40	99	99	99	99	1	2	2	2	2	2	5	3	2
301286	201903053809	13235046272	23	20190305	21:13:19	3580	1	18	1001	1001	999999999999999	999999999999999	408	1	1	9	10	1	1	15	75	2	70	2	19	12	1	70	70	1	60	3	999	1	31	40	99	99	99	99	1	2	2	1	2	2	7	3	2
301243	201903054338	13993729083	13	20190305	13:26:03	823	1	18	1001	1001	999999999999999	999999999999999	385	1	6	9	11	1	1	999	999	2	999	1	18	10	1	70	50	1	999	99	999	9	99	99	99	99	99	99	9	9	9	9	9	9	999	9	4
301193	201903055026	13436822059	10	20190305	01:02:01	1024	1	18	1001	1001	999999999999999	999999999999999	388	1	1	9	10	1	1	999	999	6	999	1	29	16	2	39	5	1	999	99	999	9	99	99	99	99	99	99	9	9	9	9	9	9	999	9	4
301224	201903055821	19972477269	21	20190305	10:37:46	3645	1	18	1001	1001	999999999999999	999999999999999	332	1	6	5	11	1	1	20	100	2	95	1	27	16	2	38	50	1	82	1	999	1	32	40	99	99	99	99	1	2	2	2	2	1	7	3	2
301198	201903055823	17877372832	14	20190305	03:03:09	4234	1	18	1001	1001	999999999999999	999999999999999	389	1	6	9	11	1	1	20	85	7	70	1	19	12	1	70	60	1	999	99	999	9	99	99	99	99	99	99	9	9	9	9	9	9	999	9	3
301284	201903055836	18346343977	20	20190305	19:51:08	3344	1	18	1001	1001	999999999999999	999999999999999	383	1	1	9	10	1	1	999	95	6	95	2	19	11	1	44	1	1	64	10	999	1	30	40	99	99	99	99	2	1	2	2	2	1	10	3	2
301197	201903055953	18554231582	10	20190305	03:53:29	4113	1	18	1001	1001	999999999999999	999999999999999	406	1	6	6	11	1	2	30	60	1	0	1	18	12	1	70	18	1	68	0	999	1	31	40	99	99	99	99	1	1	2	2	2	1	7	2	2
301210	201903056045	18152070510	13	20190305	08:17:52	3688	1	18	1001	1001	999999999999999	999999999999999	124	1	6	6	11	5	2	30	80	6	60	1	25	17	1	52	1	1	81	0	999	1	30	40	99	99	99	99	1	1	2	1	2	1	12	3	2
301282	201903056803	13121366788	10	20190305	19:43:47	3699	1	18	1001	1001	999999999999999	999999999999999	408	1	1	9	10	1	1	999	999	2	999	1	25	18	1	70	2	1	53	0	999	1	32	40	99	99	99	99	2	1	2	1	2	2	5	2	2
301253	201903056963	17623524200	10	20190305	13:58:00	3636	1	18	1001	1001	999999999999999	999999999999999	385	1	1	9	10	1	1	0	90	2	80	1	19	12	1	52	50	1	72	0	999	1	32	40	99	99	99	99	2	2	2	2	2	2	4	2	2
301242	201903058116	15604448833	23	20190305	13:13:58	2425	1	18	1001	1001	999999999999999	999999999999999	360	1	1	9	10	1	1	20	40	2	80	2	30	9	1	52	50	1	999	99	999	9	99	99	99	99	99	99	9	9	9	9	9	9	999	9	3
301272	201903058304	15896552048	19	20190305	16:15:12	1170	1	18	1001	1001	999999999999999	999999999999999	408	1	1	9	10	1	1	999	999	2	100	2	47	12	2	52	50	1	999	99	999	9	99	99	99	99	99	99	9	9	9	9	9	9	999	9	3
301221	201903058376	17733922785	18	20190305	10:02:16	2753	1	18	1001	1001	999999999999999	999999999999999	124	1	1	1	10	1	1	40	75	2	60	1	31	18	1	40	50	1	77	0	999	1	30	40	99	99	99	99	1	1	2	2	2	1	8	3	2
301220	201903058591	18625177865	24	20190305	10:29:21	3367	1	18	1001	1001	999999999999999	999999999999999	410	1	6	5	11	5	2	0	87	2	80	1	27	12	1	38	50	1	74	7	999	3	32	40	99	99	99	99	1	2	2	2	2	2	7	3	2
301265	201903059110	13009603668	37	20190305	15:17:55	940	1	18	1001	1001	999999999999999	999999999999999	124	1	1	1	10	1	1	999	999	1	999	2	25	12	1	38	2	1	999	99	999	9	99	99	99	99	99	99	9	9	9	9	9	9	999	9	4
301278	201903059315	13684844920	14	20190305	18:28:58	1006	1	11	1001	1001	999999999999999	999999999999999	335	1	1	9	10	1	1	30	50	2	60	2	22	6	1	42	2	1	999	0	999	9	30	40	99	99	99	99	9	9	9	9	9	9	1	9	5
301206	201903059834	13291859806	39	20190305	08:31:15	3655	1	18	1001	1001	999999999999999	999999999999999	410	1	1	9	10	1	1	999	999	2	50	2	22	14	1	70	50	1	90	1	999	1	32	40	99	99	99	99	2	2	2	2	2	1	4	2	2
301217	201903059957	18231375390	18	20190305	09:42:49	1519	1	18	1001	1001	999999999999999	999999999999999	360	1	1	9	10	1	1	999	50	1	0	1	27	16	2	39	50	1	999	99	999	9	99	99	99	99	99	99	9	9	9	9	9	9	999	9	4
301297	201903060947	17366356156	10	20190306	03:12:49	3704	1	18	1001	1001	999999999999999	999999999999999	383	1	1	9	10	1	2	0	75	2	50	2	36	8	4	38	1	1	76	0	999	1	32	40	99	99	99	99	1	1	2	1	2	1	9	3	2
301314	201903061421	13618601733	21	20190306	08:03:13	3064	1	18	1001	1001	999999999999999	999999999999999	124	1	1	1	10	1	1	20	70	2	50	1	20	12	1	52	50	1	66	0	999	1	32	40	99	99	99	99	1	1	2	2	2	1	8	3	2
301365	201903062266	13873208347	22	20190306	20:45:19	5199	1	18	1001	1001	999999999999999	999999999999999	410	1	6	9	11	1	1	10	45	6	40	1	18	12	1	70	50	1	71	3	999	1	32	40	99	99	99	99	1	1	1	2	1	1	12	3	2
301307	201903062371	18350181512	12	20190306	06:49:40	3649	1	18	1001	1001	999999999999999	999999999999999	401	1	1	9	10	1	1	50	80	1	0	2	38	9	4	44	12	1	69	0	999	1	32	40	99	99	99	99	1	1	2	1	2	2	8	2	2
301317	201903062467	18669037601	23	20190306	08:29:24	3665	1	11	1001	1001	999999999999999	999999999999999	403	1	6	9	11	5	2	20	999	2	70	2	19	12	1	70	50	1	83	0	999	1	32	40	99	99	99	99	2	1	2	2	2	2	5	2	2
301366	201903062551	18230260836	18	20190306	21:02:11	987	1	18	1001	1001	999999999999999	999999999999999	117	1	1	9	10	1	1	999	999	1	0	1	20	14	1	70	50	1	999	99	999	9	99	99	99	99	99	99	9	9	9	9	9	9	999	9	4
301330	201903062603	17838558993	19	20190306	12:26:17	1363	1	18	1001	1001	999999999999999	999999999999999	124	1	7	7	13	5	4	30	50	1	0	1	24	16	1	52	50	1	999	0	999	9	30	40	99	99	99	99	9	9	9	9	9	9	0	9	5
301367	201903062789	15056839355	11	20190306	21:49:19	1893	1	18	1001	1001	999999999999999	999999999999999	386	1	1	9	10	1	1	999	65	1	0	2	20	12	1	88	50	1	6	0	999	1	30	40	99	99	99	99	2	1	2	2	2	1	4	2	2
301355	201903062886	18786668489	16	20190306	17:50:05	3530	1	18	1001	1001	999999999999999	999999999999999	386	1	6	5	11	1	1	10	90	2	70	1	24	16	1	22	60	1	76	1	999	1	32	40	99	99	99	99	1	1	1	1	2	1	11	2	2
301342	201903063106	18180580913	32	20190306	14:54:21	3282	1	18	1001	1001	999999999999999	999999999999999	385	1	1	9	10	1	1	35	75	1	0	1	33	16	2	38	5	1	17	0	999	1	30	40	99	99	99	99	2	2	2	2	2	2	3	2	2
301369	201903063546	15927475665	21	20190306	21:51:50	2060	4	18	1001	1001	999999999999999	999999999999999	396	1	5	2	26	1	1	10	65	1	0	2	26	15	1	52	5	1	999	99	999	9	99	99	99	99	99	99	9	9	9	9	9	9	999	9	3
301356	201903063897	13394729709	27	20190306	18:11:00	3559	1	18	1001	1001	999999999999999	999999999999999	396	1	1	9	10	1	1	0	100	2	75	2	25	15	1	40	50	1	90	1	999	1	32	40	99	99	99	99	1	2	2	2	2	1	7	2	2
301361	201903064197	13996279397	40	20190306	19:54:02	3257	1	18	1001	1001	999999999999999	999999999999999	386	1	1	9	10	1	1	20	80	2	80	1	27	16	2	52	5	1	60	0	999	1	32	40	99	99	99	99	1	2	2	2	2	1	6	2	2
301292	201903064531	15058587700	39	20190306	00:41:20	3694	1	18	1001	1001	999999999999999	999999999999999	401	1	1	9	10	1	1	50	90	1	0	2	24	15	1	44	50	1	82	0	999	1	32	40	99	99	99	99	1	2	2	2	2	1	6	2	2
301331	201903064730	15713190859	18	20190306	13:14:35	2823	1	18	1001	1001	999999999999999	999999999999999	404	1	1	9	10	1	1	0	70	7	80	2	19	10	1	70	50	1	999	99	999	9	99	99	99	99	99	99	9	9	9	9	9	9	999	9	4
301327	201903064883	17338129871	10	20190306	11:46:47	3581	6	13	1001	1001	999999999999999	999999999999999	387	1	1	1	10	1	1	70	70	1	0	1	36	19	2	38	12	1	54	0	999	1	32	40	99	99	99	99	1	1	2	2	2	2	5	1	2
301322	201903065493	18610870467	10	20190306	09:24:54	4155	1	18	1001	1001	999999999999999	999999999999999	124	1	6	5	24	1	1	20	100	2	80	2	22	16	1	52	50	1	96	0	999	1	32	40	99	99	99	99	1	1	2	2	1	2	8	3	2
301319	201903065681	17830473707	34	20190306	09:32:26	3502	1	18	1001	1001	999999999999999	999999999999999	402	1	6	9	11	5	2	60	70	1	0	2	28	9	1	52	50	1	42	0	999	1	30	40	99	99	99	99	1	1	1	2	2	1	6	1	2
301326	201903065946	13662358007	35	20190306	10:16:18	3549	1	18	1001	1001	999999999999999	999999999999999	403	1	6	9	11	1	1	35	95	2	50	1	32	8	1	52	1	1	98	0	999	1	32	40	99	99	99	99	1	1	2	1	1	2	9	2	2
301321	201903065947	8801739231194	18	20190306	09:51:48	1668	1	18	1001	1001	999999999999999	999999999999999	385	1	2	9	10	1	1	999	999	1	0	1	25	18	1	70	50	1	999	99	999	9	99	99	99	99	99	99	9	9	9	9	9	9	999	9	3
301353	201903066017	262898809076	10	20190306	17:19:13	2613	1	18	1001	1001	999999999999999	999999999999999	410	1	1	9	10	1	1	85	70	1	0	1	25	18	1	70	50	1	999	99	999	9	99	99	99	99	99	99	9	9	9	9	9	9	999	9	3
301311	201903066067	15225168055	19	20190306	08:48:54	3378	1	18	1001	1001	999999999999999	999999999999999	404	1	1	9	10	1	1	999	65	2	70	2	35	16	2	38	50	1	91	0	999	1	32	40	99	99	99	99	1	2	2	2	2	2	4	2	2
301338	201903067260	18305841774	25	20190306	13:03:10	2258	1	18	1001	1001	999999999999999	999999999999999	124	1	6	6	23	5	1	80	40	1	0	1	19	13	1	70	1	1	20	0	999	1	30	40	99	99	99	99	1	2	2	2	2	2	1	3	2
301362	201903067357	18846936626	20	20190306	19:15:49	3610	1	18	1001	1001	999999999999999	999999999999999	117	1	1	9	10	1	1	0	85	2	65	2	25	16	1	38	50	1	76	0	999	3	32	40	99	99	99	99	1	2	2	2	2	2	6	2	2
301329	201903067673	15088615593	39	20190306	12:23:38	3582	1	18	1001	1001	999999999999999	999999999999999	402	1	6	9	23	1	1	35	75	2	30	2	29	16	1	52	50	1	83	0	999	1	32	40	99	99	99	99	1	2	2	2	2	2	5	1	2
301371	201903067766	13681433122	24	20190306	22:32:16	3689	1	18	1001	1001	999999999999999	999999999999999	386	1	6	5	11	1	1	10	80	6	80	2	19	12	1	70	70	1	80	1	999	1	32	40	99	99	99	99	1	2	1	2	2	2	10	2	2
301345	201903067858	18914894368	24	20190306	16:02:38	3731	2	18	1001	1001	999999999999999	999999999999999	386	1	6	9	11	1	1	10	80	2	70	2	28	15	1	52	50	1	71	0	999	1	32	40	99	99	99	99	1	1	1	2	2	2	8	2	2
301357	201903068433	15268118263	39	20190306	18:12:40	2737	1	18	1001	1001	999999999999999	999999999999999	117	1	6	9	11	5	1	10	90	2	30	1	32	19	1	31	50	1	999	99	999	9	99	99	99	99	99	99	9	9	9	9	9	9	999	9	3
301352	201903068567	13910766793	10	20190306	16:56:00	3257	1	18	1001	1001	999999999999999	999999999999999	396	1	1	9	10	1	1	100	100	1	0	2	41	16	2	38	50	1	69	0	999	1	32	40	99	99	99	99	1	2	2	2	2	1	4	2	2
301300	201903069002	18852090975	24	20190306	04:51:25	2252	1	18	1001	1001	999999999999999	999999999999999	408	1	6	9	24	1	1	50	95	3	90	2	19	14	1	21	1	1	53	1	999	1	30	40	99	99	99	99	1	1	2	2	2	2	11	3	2
301320	201903069132	15910798996	27	20190306	10:08:05	3610	1	88	1001	1001	999999999999999	999999999999999	404	1	1	9	10	1	1	60	90	1	0	1	28	20	1	70	2	1	74	0	999	1	32	40	99	99	99	99	1	2	1	2	2	1	5	2	2
301337	201903069217	13240149781	10	20190306	13:17:17	2461	1	18	1001	1001	999999999999999	999999999999999	387	1	6	9	11	1	1	999	80	2	80	1	50	12	4	20	50	1	999	99	999	9	99	99	99	99	99	99	9	9	9	9	9	9	999	9	3
301294	201903069539	13166808644	23	20190306	01:46:42	3592	1	18	1001	1001	999999999999999	999999999999999	335	1	6	9	11	1	1	0	100	2	90	1	25	12	1	52	50	1	84	0	999	4	32	40	99	99	99	99	1	1	2	1	2	1	10	3	2
301296	201903069789	18931089600	18	20190306	03:27:23	3547	1	18	1001	1001	999999999999999	999999999999999	408	1	1	9	10	1	1	50	70	3	80	2	21	12	1	52	50	1	96	3	999	4	32	40	99	99	99	99	1	1	1	2	2	1	11	2	2
301478	201903070185	18510003128	10	20190307	22:38:54	3670	1	11	1001	1001	999999999999999	999999999999999	402	1	1	9	10	1	1	20	80	2	999	1	28	16	1	38	4	1	72	2	999	4	32	40	99	99	99	99	1	1	2	1	2	1	11	2	2
301375	201903070235	18407533883	14	20190307	00:29:07	706	1	18	1001	1001	999999999999999	999999999999999	386	1	1	9	10	1	1	999	999	2	75	2	21	6	1	88	50	1	999	99	999	9	99	99	99	99	99	99	9	9	9	9	9	9	999	9	4
301461	201903070338	13784979480	18	20190307	19:13:46	3263	1	18	1001	1001	999999999999999	999999999999999	404	1	1	9	10	1	1	50	95	1	0	2	26	15	2	52	50	1	83	0	999	1	32	40	99	99	99	99	1	2	2	2	2	1	5	2	2
301475	201903070465	18323647195	40	20190307	22:11:54	1165	2	18	1001	1001	999999999999999	999999999999999	385	1	6	9	24	1	1	999	999	2	80	1	20	12	1	70	50	1	999	99	999	9	99	99	99	99	99	99	9	9	9	9	9	9	999	9	4
301448	201903070840	15980058345	10	20190307	16:38:03	3646	1	88	1001	1001	999999999999999	999999999999999	316	1	1	9	10	1	1	50	99	2	50	1	24	16	1	38	2	1	63	0	999	3	30	40	99	99	99	99	1	1	2	2	2	2	7	3	2
301444	201903071374	15778819603	15	20190307	15:22:37	2762	1	18	1001	1001	999999999999999	999999999999999	124	1	1	1	10	1	1	50	90	2	60	1	18	12	1	70	50	1	58	0	999	1	30	40	99	99	99	99	2	1	2	2	2	2	6	3	2
301468	201903071516	85125807	10	20190307	20:38:46	2349	1	10	1001	1001	999999999999999	999999999999999	316	1	1	9	10	1	1	60	80	1	0	1	53	15	2	52	1	1	999	99	999	9	99	99	99	99	99	99	9	9	9	9	9	9	999	9	4
301417	201903071561	18779884077	28	20190307	10:52:21	4086	1	18	1001	1001	999999999999999	999999999999999	124	1	1	1	10	1	1	20	90	2	0	2	28	19	1	38	60	1	81	1	999	1	32	40	99	99	99	99	1	2	2	2	2	2	6	3	2
301378	201903071769	19992680234	32	20190307	01:30:17	607	1	11	1001	1001	999999999999999	999999999999999	396	1	9	9	99	9	9	999	999	9	999	2	25	15	1	38	50	1	999	99	999	9	99	99	99	99	99	99	9	9	9	9	9	9	999	9	4
301477	201903071932	17860120448	30	20190307	22:41:35	3628	1	18	1001	1001	999999999999999	999999999999999	385	1	1	9	10	1	1	50	100	2	100	2	19	12	1	38	50	1	82	0	999	5	32	40	99	99	99	99	1	1	2	2	2	2	8	2	2
301427	201903071942	15942343092	26	20190307	13:06:55	2817	4	18	1001	1001	999999999999999	999999999999999	387	1	1	9	10	1	1	30	90	1	0	1	28	16	1	52	50	1	88	0	999	1	30	40	99	99	99	99	1	2	2	2	2	1	6	3	2
301470	201903071967	18143066825	23	20190307	20:45:56	2695	1	18	1001	1001	999999999999999	999999999999999	360	1	1	9	10	1	1	0	90	2	80	2	22	16	1	70	50	1	65	0	999	1	32	40	99	99	99	99	1	1	2	2	2	2	7	3	2
301449	201903072189	13989072292	36	20190307	16:27:19	1118	1	18	1001	1001	999999999999999	999999999999999	360	1	1	9	10	1	1	999	999	9	999	2	27	15	2	35	50	1	999	99	999	9	99	99	99	99	99	99	9	9	9	9	9	9	999	9	4
301381	201903072244	17600913985	31	20190307	03:33:55	3666	2	99	1001	1001	999999999999999	999999999999999	117	1	1	9	10	1	1	99	90	6	80	2	22	7	1	52	50	1	58	1	999	3	32	40	99	99	99	99	1	2	2	2	2	2	9	2	2
301384	201903072966	15989246794	14	20190307	06:07:26	897	1	99	1001	1001	999999999999999	999999999999999	117	1	9	9	99	9	9	999	999	9	999	1	23	99	2	52	99	1	999	99	999	9	99	99	99	99	99	99	9	9	9	9	9	9	999	9	4
301408	201903073034	5342669761	30	20190307	08:59:52	4159	1	18	1001	1001	999999999999999	999999999999999	124	1	5	5	24	1	1	10	80	1	10	1	53	16	2	40	50	1	54	0	999	1	32	40	99	99	99	99	1	1	2	2	2	1	8	3	2
301393	201903073212	18834166599	31	20190307	08:02:17	3610	2	99	1001	1001	999999999999999	999999999999999	336	1	5	6	11	1	1	70	85	2	65	2	21	14	1	70	2	1	57	0	999	1	30	40	99	99	99	99	1	2	2	2	2	2	4	3	2
301418	201903073456	13910710018	10	20190307	12:00:27	3294	1	14	1001	1001	999999999999999	999999999999999	412	1	8	9	10	1	1	55	80	1	0	1	52	9	4	44	50	1	43	0	999	1	31	40	99	99	99	99	1	2	2	2	2	2	2	3	2
301379	201903073515	13925104058	14	20190307	01:41:43	2284	5	18	1001	1001	15323358324	999999999999999	396	1	6	5	11	1	1	50	90	1	0	2	26	12	1	44	17	1	50	0	999	1	31	40	99	99	99	99	1	2	2	2	2	2	3	2	2
301414	201903074137	13436192688	40	20190307	10:03:21	3530	1	18	1001	1001	999999999999999	999999999999999	411	1	1	9	10	1	1	0	80	2	999	1	24	16	1	52	50	1	999	0	999	9	30	40	99	99	99	99	9	9	9	9	9	9	1	9	5
301401	201903074497	13387563632	21	20190307	08:57:28	3161	1	18	1001	1001	999999999999999	999999999999999	391	1	1	9	10	1	1	50	0	1	0	1	18	9	1	52	50	1	65	3	999	1	32	40	99	99	99	99	1	1	2	1	2	2	7	3	2
301403	201903075588	18602395483	40	20190307	09:55:31	2164	1	18	1001	1001	999999999999999	999999999999999	412	1	1	9	10	1	1	50	65	1	0	1	19	12	1	70	60	1	43	0	999	1	31	40	99	99	99	99	1	1	1	2	2	2	6	3	2
301409	201903075717	18022486886	14	20190307	10:20:57	3636	1	18	1001	1001	999999999999999	999999999999999	387	1	1	9	10	1	1	10	85	1	0	2	30	12	2	44	8	1	65	0	999	1	32	40	99	99	99	99	2	1	1	2	2	1	8	2	2
301411	201903075926	13571814419	32	20190307	09:42:24	3688	5	18	1001	1001	15011254919	999999999999999	403	1	5	9	26	1	1	50	50	1	0	1	29	18	1	52	4	1	59	0	999	1	31	40	99	99	99	99	2	2	2	2	2	2	3	2	2
301452	201903076117	13099110449	13	20190307	16:52:27	2747	1	18	1001	1001	999999999999999	999999999999999	404	1	1	9	10	1	1	10	70	3	80	2	27	10	1	38	50	1	56	0	999	1	32	40	99	99	99	99	2	2	2	2	2	1	5	2	2
301432	201903076537	18667387905	39	20190307	13:54:21	3477	1	18	1001	1001	999999999999999	999999999999999	412	1	6	9	11	5	2	0	85	2	80	2	20	13	1	70	1	1	98	0	999	1	32	40	99	99	99	99	1	2	2	2	2	1	6	3	2
301471	201903076683	17317450506	33	20190307	20:54:16	3616	1	18	1001	1001	999999999999999	999999999999999	402	1	6	5	11	5	2	20	60	1	0	1	21	13	1	70	50	1	58	0	999	1	30	40	99	99	99	99	1	1	1	2	2	1	8	2	2
301467	201903077037	18902152067	35	20190307	20:09:38	1485	1	18	1001	1001	999999999999999	999999999999999	316	1	6	9	23	1	6	999	90	2	70	2	21	14	1	70	50	1	999	99	999	9	99	99	99	99	99	99	9	9	9	9	9	9	999	9	4
301383	201903077244	13417910815	14	20190307	05:36:59	3152	1	18	1001	1001	999999999999999	999999999999999	410	1	1	9	10	1	1	10	80	2	80	1	24	16	1	38	3	1	56	0	999	1	30	40	99	99	99	99	1	2	2	2	2	2	5	3	2
301400	201903077245	15254577592	30	20190307	09:00:29	3625	1	18	1001	1001	999999999999999	999999999999999	387	1	1	9	10	1	1	999	80	2	100	1	22	14	1	70	50	1	91	0	999	1	32	40	99	99	99	99	2	1	2	2	1	1	7	3	2
301459	201903077668	16638739109	19	20190307	18:08:18	2483	1	18	1001	1001	999999999999999	999999999999999	402	1	1	9	10	1	1	0	100	2	99	1	25	16	1	52	50	1	999	99	999	9	99	99	99	99	99	99	9	9	9	9	9	9	999	9	3
301397	201903077915	13910667630	10	20190307	08:17:19	1081	2	18	1001	1001	999999999999999	999999999999999	124	1	1	9	10	1	1	999	999	9	999	1	50	16	1	38	50	1	999	99	999	9	99	99	99	99	99	99	9	9	9	9	9	9	999	9	4
301420	201903077958	17862232102	30	20190307	11:40:24	3910	3	13	1001	1001	999999999999999	999999999999999	391	1	6	2	11	1	1	0	0	5	0	1	25	15	1	38	50	1	999	99	999	9	99	99	99	99	99	99	9	9	9	9	9	9	999	9	3
301422	201903078180	13388738716	38	20190307	12:47:06	3425	1	18	1001	1001	999999999999999	999999999999999	336	1	1	9	10	1	1	80	92	1	0	1	21	13	1	70	1	1	58	0	999	1	32	40	99	99	99	99	1	2	2	2	2	1	4	3	2
301402	201903078181	13870059332	25	20190307	09:44:37	1736	1	18	1001	1001	999999999999999	999999999999999	336	1	1	9	10	1	1	80	80	2	40	1	24	99	1	52	50	1	999	99	999	9	99	99	99	99	99	99	9	9	9	9	9	9	999	9	3
301380	201903078257	87167266252	38	20190307	03:14:26	5077	1	18	1001	1001	999999999999999	999999999999999	410	1	1	9	10	1	1	20	95	6	95	1	24	12	1	52	9	1	67	2	999	1	30	40	99	99	99	99	2	1	1	2	2	2	11	3	2
301428	201903078723	18587370710	38	20190307	12:45:45	3345	1	18	1001	1001	999999999999999	999999999999999	403	1	1	1	10	1	1	20	98	6	98	1	24	12	1	52	4	1	67	2	999	1	30	40	99	99	99	99	1	1	2	2	2	2	11	3	2
301476	201903079084	13607979920	25	20190307	22:43:03	2295	1	18	1001	1001	999999999999999	999999999999999	404	1	6	9	11	1	7	60	65	7	999	1	44	15	4	52	50	1	999	99	999	9	99	99	99	99	99	99	9	9	9	9	9	9	999	9	4
301442	201903079121	13206902710	20	20190307	14:19:26	2269	1	18	1001	1001	999999999999999	999999999999999	391	1	1	9	10	1	1	0	85	1	0	1	20	14	1	70	50	1	74	0	999	1	32	40	99	99	99	99	2	1	2	2	2	2	5	3	2
301457	201903079241	15034675733	31	20190307	18:01:36	3533	1	18	1001	1001	999999999999999	999999999999999	385	1	1	9	10	1	9	999	80	1	0	2	26	12	1	38	50	1	54	0	999	1	31	40	99	99	99	99	2	2	2	2	2	2	2	2	2
301469	201903079643	13839815022	19	20190307	19:45:50	2332	1	18	1001	1001	999999999999999	999999999999999	360	1	6	9	11	5	2	10	50	2	60	1	42	12	2	50	50	1	41	0	999	9	30	40	99	99	99	99	9	9	9	9	9	9	0	9	5
301382	201903079709	15675151069	22	20190307	04:53:35	2933	1	18	1001	1001	999999999999999	999999999999999	117	1	6	5	16	1	1	999	80	2	60	1	31	16	1	40	50	1	999	99	999	9	99	99	99	99	99	99	9	9	9	9	9	9	999	9	3
301399	201903079774	18043711125	23	20190307	08:22:28	3702	2	18	1001	1001	999999999999999	999999999999999	411	1	6	9	24	1	1	10	15	3	90	2	19	12	1	70	70	1	68	0	999	1	31	40	99	99	99	99	1	1	2	2	2	2	6	3	2
301377	201903079789	13215927875	12	20190307	01:11:50	5526	1	18	1001	1001	999999999999999	999999999999999	386	1	1	9	10	1	1	46	86	5	100	2	18	6	1	88	1	1	72	3	999	1	32	40	99	99	99	99	1	1	2	1	2	1	13	2	2
301483	201903080474	18811706283	10	20190308	00:14:06	3471	2	18	1001	1001	999999999999999	999999999999999	316	1	1	9	10	1	1	50	70	1	0	2	19	13	1	70	1	1	49	0	999	1	30	40	99	99	99	99	1	2	2	2	2	1	4	3	2
301543	201903080589	18654657160	30	20190308	14:33:58	1166	1	18	1001	1001	999999999999999	999999999999999	389	1	1	9	10	1	1	50	50	1	0	1	20	12	1	70	50	1	999	99	999	9	99	99	99	99	99	99	9	9	9	9	9	9	999	9	4
301519	201903080776	13983792297	40	20190308	09:51:51	3607	1	18	1001	1001	999999999999999	999999999999999	389	1	5	9	24	1	1	15	86	1	0	1	38	12	2	39	50	1	52	0	999	1	31	40	99	99	99	99	1	2	2	2	2	2	5	2	2
301495	201903080816	15552946098	30	20190308	06:35:49	3754	1	18	1001	1001	999999999999999	999999999999999	402	1	1	9	10	1	1	0	80	7	70	1	23	12	1	38	50	1	73	1	999	1	31	40	99	99	99	99	1	1	2	1	2	1	10	2	2
301548	201903081019	17596220640	19	20190308	14:58:56	2893	1	11	1001	1001	999999999999999	999999999999999	391	1	6	9	11	1	1	20	85	2	70	2	19	12	1	52	50	1	63	3	999	1	31	40	99	99	99	99	1	1	2	2	2	2	8	3	2
301502	201903081404	17600849972	10	20190308	08:42:31	2575	1	18	1001	1001	999999999999999	999999999999999	406	1	5	5	10	1	1	50	80	2	50	1	23	15	1	70	20	1	54	0	999	1	32	40	99	99	99	99	1	1	2	2	2	2	7	2	2
301501	201903081570	62997103	10	20190308	08:44:26	2798	1	16	1001	1001	999999999999999	999999999999999	388	1	6	9	13	5	4	0	60	2	85	1	38	12	1	52	50	1	80	0	999	1	32	40	99	99	99	99	1	1	2	2	1	2	8	3	2
301491	201903081657	18941627742	26	20190308	03:29:14	3125	1	18	1001	1001	999999999999999	999999999999999	385	1	6	9	24	1	1	50	100	2	98	1	21	14	1	70	50	1	999	99	999	9	99	99	99	99	99	99	9	9	9	9	9	9	999	9	3
301490	201903081736	15075553334	10	20190308	02:06:32	3599	1	18	1001	1001	999999999999999	999999999999999	360	1	1	9	10	1	1	0	80	1	0	1	24	16	1	35	2	1	47	0	999	1	30	40	99	99	99	99	2	1	2	2	2	2	4	3	2
301514	201903081822	18501450308	24	20190308	10:08:53	3955	1	18	1001	1001	999999999999999	999999999999999	388	1	6	9	11	1	1	999	999	2	95	2	23	16	1	44	50	1	61	4	999	1	31	40	99	99	99	99	1	1	2	1	1	1	9	3	2
301518	201903082328	18840847300	26	20190308	10:49:34	2670	1	18	1001	1001	999999999999999	999999999999999	412	1	2	9	10	1	1	45	85	2	60	1	25	15	1	70	50	1	59	4	999	1	31	40	99	99	99	99	1	1	2	2	2	2	8	2	2
301546	201903082430	18055510091	11	20190308	15:07:03	2684	1	18	1001	1001	999999999999999	999999999999999	406	1	1	1	10	1	1	0	80	2	80	1	20	13	1	70	20	1	84	0	999	1	32	40	99	99	99	99	1	1	2	2	2	2	7	2	2
301520	201903082646	15830322281	18	20190308	10:47:10	2284	1	18	1001	1001	999999999999999	999999999999999	391	1	1	9	10	1	1	10	60	2	30	1	29	16	1	52	50	1	999	99	999	9	99	99	99	99	99	99	9	9	9	9	9	9	999	9	3
301534	201903082722	13136112627	39	20190308	14:06:45	2585	1	18	1001	1001	999999999999999	999999999999999	391	1	5	9	26	1	1	20	80	2	45	1	25	18	1	70	1	1	999	99	999	9	99	99	99	99	99	99	9	9	9	9	9	9	999	9	3
301485	201903082726	15679986121	25	20190308	00:13:26	1202	1	18	1001	1001	999999999999999	999999999999999	360	1	5	9	11	1	1	50	100	1	0	2	21	12	1	35	50	1	999	99	999	9	99	99	99	99	99	99	9	9	9	9	9	9	999	9	4
301513	201903083399	18502561592	24	20190308	10:03:22	3257	1	18	1001	1001	999999999999999	999999999999999	406	1	1	1	10	1	1	0	999	1	0	2	27	16	1	52	2	1	71	0	999	1	32	40	99	99	99	99	2	2	2	2	2	2	3	2	2
301558	201903083427	15249739788	19	20190308	16:56:16	3604	1	18	1001	1001	999999999999999	999999999999999	403	1	6	9	11	5	2	80	45	1	0	2	39	12	4	20	50	1	60	0	999	1	32	40	99	99	99	99	1	2	2	2	2	2	2	2	2
301484	201903083672	15385357019	11	20190308	00:27:04	3430	1	18	1001	1001	999999999999999	999999999999999	402	1	1	9	10	1	1	95	80	1	0	2	19	14	1	70	50	1	27	0	999	1	30	40	99	99	99	99	1	2	2	2	2	1	3	2	2
301575	201903084083	18905114316	24	20190308	22:31:09	3472	2	18	1001	1001	999999999999999	999999999999999	387	1	1	9	10	1	1	5	80	6	70	2	18	14	1	70	16	1	84	2	999	5	32	40	99	99	99	99	1	2	1	2	2	2	8	1	2
301580	201903084163	19855108243	10	20190308	23:28:30	1642	1	11	1001	1001	999999999999999	999999999999999	403	1	1	1	10	1	1	999	90	2	95	2	18	11	1	70	99	1	999	99	999	9	99	99	99	99	99	99	9	9	9	9	9	9	999	9	4
301521	201903084966	15553050120	30	20190308	11:36:25	2367	1	11	1001	1001	999999999999999	999999999999999	391	1	1	9	10	1	1	25	75	1	0	2	28	16	2	35	50	1	999	99	999	9	99	99	99	99	99	99	9	9	9	9	9	9	999	9	3
301566	201903085096	18792780840	32	20190308	20:08:31	3465	1	18	1001	1001	999999999999999	999999999999999	403	1	1	1	10	1	1	5	95	5	90	2	23	15	2	38	50	1	77	0	999	1	32	40	99	99	99	99	2	2	2	2	1	2	8	2	2
301531	201903085751	17839476446	39	20190308	13:00:49	3325	1	18	1001	1001	999999999999999	999999999999999	411	1	1	9	10	1	1	999	70	1	0	2	22	12	1	44	60	1	60	0	999	1	30	40	99	99	99	99	2	1	2	2	2	2	5	3	2
301515	201903086840	18077111459	15	20190308	10:18:50	2732	1	18	1001	1001	999999999999999	999999999999999	411	1	1	9	10	1	1	35	70	2	999	1	32	16	1	44	50	1	73	0	999	1	32	40	99	99	99	99	2	1	2	2	2	2	6	3	2
301547	201903087272	18394453396	13	20190308	14:51:43	2181	1	18	1001	1001	999999999999999	999999999999999	411	1	6	5	11	1	1	45	45	2	35	2	46	16	2	38	50	1	53	0	999	1	32	40	99	99	99	99	2	2	2	2	2	2	3	3	2
301529	201903087404	18547765518	27	20190308	12:24:37	2230	1	18	1001	1001	999999999999999	999999999999999	389	1	1	9	10	1	1	75	65	1	0	2	18	11	1	70	50	1	45	0	999	1	30	40	99	99	99	99	2	1	2	2	2	1	4	2	2
301562	201903087545	13567422133	39	20190308	18:11:39	2387	1	18	1001	1001	999999999999999	999999999999999	315	1	1	9	10	1	1	30	60	2	30	1	18	11	1	70	50	1	53	0	999	1	30	40	99	99	99	99	2	1	2	2	2	1	7	3	2
301567	201903087699	15104147683	26	20190308	20:16:31	1422	1	18	1001	1001	999999999999999	999999999999999	387	1	6	7	12	5	2	60	90	1	0	2	52	9	2	60	50	1	999	99	999	9	99	99	99	99	99	99	9	9	9	9	9	9	999	9	4
301564	201903088118	13056603130	34	20190308	19:18:56	3035	1	18	1001	1001	999999999999999	999999999999999	315	1	1	9	10	1	1	15	85	3	30	2	18	11	1	35	60	1	42	2	999	1	30	40	99	99	99	99	1	1	2	1	2	1	9	3	2
301492	201903088131	18610799628	10	20190308	04:22:08	2619	1	18	1001	1001	999999999999999	999999999999999	385	1	6	9	24	1	1	50	60	2	90	1	20	13	1	70	50	1	999	99	999	9	99	99	99	99	99	99	9	9	9	9	9	9	999	9	3
301568	201903088138	15550093600	30	20190308	21:29:34	873	1	18	1001	1001	999999999999999	999999999999999	387	1	2	9	24	1	1	999	999	1	0	2	28	9	1	52	50	1	999	99	999	9	99	99	99	99	99	99	9	9	9	9	9	9	999	9	4
301573	201903088281	17791892925	32	20190308	21:53:21	3349	1	18	1001	1001	999999999999999	999999999999999	315	1	1	9	10	1	1	20	80	1	0	2	24	16	1	38	50	1	40	0	999	1	31	40	99	99	99	99	2	2	1	2	2	2	3	3	2
301511	201903088378	15202176762	33	20190308	08:41:42	3589	2	18	1001	1001	999999999999999	999999999999999	411	1	6	9	11	1	1	40	70	2	60	1	23	12	1	70	50	1	69	5	999	1	32	40	99	99	99	99	1	1	2	2	1	1	10	3	2
301550	201903088593	13783361162	19	20190308	16:28:21	3180	1	18	1001	1001	999999999999999	999999999999999	387	1	1	9	10	1	1	10	95	2	60	1	26	15	4	40	15	1	77	1	999	1	32	40	99	99	99	99	2	1	2	2	1	1	9	3	2
301489	201903088605	18582359895	34	20190308	02:09:42	3331	1	18	1001	1001	999999999999999	999999999999999	316	1	1	9	10	1	1	0	100	2	50	1	26	18	2	52	2	1	62	0	999	1	32	40	99	99	99	99	1	2	2	2	2	1	6	2	2
301545	201903088626	18600192622	10	20190308	15:09:10	2919	1	18	1001	1001	999999999999999	999999999999999	389	1	1	9	10	1	1	20	80	1	0	2	29	16	1	44	10	1	80	7	999	1	30	40	99	99	99	99	1	2	2	1	2	1	8	2	2
301570	201903089058	13880348967	34	20190308	22:05:23	779	1	18	1001	1001	999999999999999	999999999999999	336	1	1	9	10	1	1	0	100	2	0	2	25	99	1	52	50	1	999	99	999	9	99	99	99	99	99	99	9	9	9	9	9	9	999	9	4
301508	201903089569	15804732473	27	20190308	08:25:27	3685	1	88	1001	1001	999999999999999	999999999999999	391	1	6	9	11	1	1	50	90	2	90	2	30	12	1	99	9	1	67	0	999	1	32	40	99	99	99	99	1	1	2	1	1	2	9	3	2
301604	201903090065	15712927686	10	20190309	08:22:45	3120	1	18	1001	1001	999999999999999	999999999999999	383	1	5	9	24	1	1	55	70	1	0	1	34	18	1	39	15	1	62	0	999	1	32	40	99	99	99	99	2	2	2	1	2	2	3	3	2
301646	201903090542	17585274241	16	20190309	14:23:57	2008	1	18	1001	1001	999999999999999	999999999999999	406	1	1	1	10	1	1	60	89	2	50	1	21	9	1	35	8	1	74	2	999	1	32	40	99	99	99	99	1	1	2	2	2	1	8	2	2
301627	201903090720	15797797203	25	20190309	11:26:57	3639	1	18	1001	1001	999999999999999	999999999999999	360	1	1	9	10	1	1	60	80	2	40	1	26	19	1	38	50	1	51	0	999	1	31	40	99	99	99	99	2	1	2	2	2	2	5	3	2
301678	201903090736	13816795016	33	20190309	22:18:13	4997	1	18	1001	1001	999999999999999	999999999999999	412	1	5	9	10	1	1	15	90	6	90	1	22	14	1	70	50	1	72	6	999	4	32	40	99	99	99	99	1	2	2	2	1	2	8	3	2
301657	201903091110	18661208998	24	20190309	16:11:24	3549	3	18	1001	1001	999999999999999	999999999999999	391	1	6	5	16	1	1	30	999	2	75	1	26	18	1	38	50	1	69	5	999	4	30	40	99	99	99	99	1	2	2	2	2	1	7	3	2
301582	201903091178	19893217850	10	20190309	01:30:47	2825	1	18	1001	1001	999999999999999	999999999999999	336	1	1	9	10	1	1	90	65	2	65	2	18	12	1	70	50	1	71	0	999	1	32	40	99	99	99	99	1	2	2	2	2	2	4	3	2
301662	201903091419	15648125143	27	20190309	17:34:23	1284	1	18	1001	1001	999999999999999	999999999999999	391	1	1	9	10	1	1	0	70	1	0	2	22	15	1	38	50	1	999	1	999	9	30	40	99	99	99	99	9	9	9	9	9	9	2	9	5
301589	201903092602	18126849211	14	20190309	04:36:46	3559	1	18	1001	1001	999999999999999	999999999999999	315	1	1	9	10	1	1	30	90	3	75	2	23	11	1	38	3	1	69	0	999	1	32	40	99	99	99	99	2	2	2	2	2	2	4	3	2
301617	201903092672	13700311820	18	20190309	10:01:35	1384	1	99	1001	1001	999999999999999	999999999999999	383	1	5	9	10	1	1	999	100	2	5	1	50	99	6	99	99	1	999	99	999	9	99	99	99	99	99	99	9	9	9	9	9	9	999	9	4
301671	201903092888	18662475681	24	20190309	20:38:08	2456	1	18	1001	1001	999999999999999	999999999999999	412	1	1	9	11	1	1	30	100	2	80	2	18	8	1	70	50	1	88	1	999	5	32	40	99	99	99	99	1	1	2	2	2	1	9	3	2
301626	201903093657	15601799491	33	20190309	12:25:35	3402	1	18	1001	1001	999999999999999	999999999999999	406	1	1	1	10	1	1	40	50	2	40	1	24	16	1	38	1	1	71	0	999	1	32	40	99	99	99	99	1	1	2	2	2	1	8	2	2
301583	201903094465	15522507236	35	20190309	00:42:57	3633	2	18	1001	1001	999999999999999	999999999999999	403	1	1	9	10	1	1	999	999	2	999	1	32	19	1	39	60	1	83	0	999	1	32	40	99	99	99	99	1	1	2	2	1	1	7	2	2
301592	201903096606	17850395695	15	20190309	06:13:11	1074	1	18	1001	1001	999999999999999	999999999999999	336	1	1	9	10	1	1	50	100	2	50	2	19	13	1	70	50	1	999	99	999	9	99	99	99	99	99	99	9	9	9	9	9	9	999	9	3
301585	201903097631	15723818654	15	20190309	03:18:56	3597	1	18	1001	1001	999999999999999	999999999999999	387	1	6	9	11	1	1	60	85	2	90	2	23	12	1	52	50	1	58	5	999	1	32	40	99	99	99	99	1	1	1	2	2	2	8	2	2
301587	201903097891	13079905049	37	20190309	03:49:58	845	1	99	1001	1001	999999999999999	999999999999999	315	1	6	9	12	1	1	999	0	2	70	2	30	99	1	44	99	1	999	99	999	9	99	99	99	99	99	99	9	9	9	9	9	9	999	9	4
301608	201903098276	13821398605	35	20190309	09:00:56	739	1	18	1001	1001	999999999999999	999999999999999	360	1	1	9	10	1	1	999	999	9	999	2	18	12	1	70	50	1	999	99	999	9	99	99	99	99	99	99	9	9	9	9	9	9	999	9	4
301643	201903098416	18961308099	24	20190309	14:07:19	697	1	18	1001	1001	999999999999999	999999999999999	383	1	9	9	99	9	9	999	999	2	999	2	34	12	2	43	50	1	999	99	999	9	99	99	99	99	99	99	9	9	9	9	9	9	999	9	4
301675	201903098691	19904382346	23	20190309	21:26:06	1906	1	18	1001	1001	999999999999999	999999999999999	411	1	1	9	10	1	1	60	90	1	0	2	20	12	1	70	50	1	50	0	999	1	30	40	99	99	99	99	2	1	2	2	2	2	4	3	2
301624	201903099158	19876648453	14	20190309	10:35:26	879	1	18	1001	1001	999999999999999	999999999999999	360	1	6	9	11	5	2	999	999	2	999	1	19	12	1	70	50	1	999	99	999	9	99	99	99	99	99	99	9	9	9	9	9	9	999	9	4
301683	201903099201	15810684160	10	20190309	23:11:02	3697	1	11	1001	1001	999999999999999	999999999999999	332	1	5	9	26	1	1	45	85	3	70	1	26	17	1	38	50	1	69	0	999	1	32	40	99	99	99	99	1	1	2	2	2	1	8	3	2
301650	201903099318	13856631397	11	20190309	14:47:52	3592	1	18	1001	1001	999999999999999	999999999999999	383	1	1	9	10	1	1	30	65	2	50	1	21	16	1	70	50	1	42	0	999	1	31	40	99	99	99	99	2	1	1	2	2	1	7	3	2
301601	201903099552	18519339609	27	20190309	08:32:29	3198	1	18	1001	1001	999999999999999	999999999999999	406	1	1	1	10	1	1	20	50	3	50	1	25	16	1	40	20	1	90	0	999	1	32	40	99	99	99	99	2	2	2	2	1	1	6	2	2
301588	201903099584	18551764416	32	20190309	04:18:06	768	1	18	1001	1001	999999999999999	999999999999999	315	1	9	9	99	9	9	999	999	2	999	2	36	99	1	52	50	1	999	99	999	9	99	99	99	99	99	99	9	9	9	9	9	9	999	9	4
301732	201903100130	17509070513	10	20190310	09:40:34	3859	1	18	1001	1001	999999999999999	999999999999999	335	1	6	9	11	1	2	20	30	4	80	2	20	13	1	70	1	1	49	1	999	3	30	40	99	99	99	99	1	1	2	2	2	1	11	3	2
301738	201903100755	15220332454	14	20190310	10:32:28	1189	1	99	1001	1001	999999999999999	999999999999999	410	1	1	9	10	1	1	999	999	7	999	2	21	16	9	52	99	1	999	99	999	9	99	99	99	99	99	99	9	9	9	9	9	9	999	9	4
301698	201903100992	13156996554	30	20190310	04:24:27	2476	1	18	1001	1001	999999999999999	999999999999999	411	1	6	9	11	1	1	30	85	2	999	1	27	16	1	38	50	1	999	99	999	9	99	99	99	99	99	99	9	9	9	9	9	9	999	9	3
301735	201903101916	13345409154	37	20190310	10:06:32	4702	1	18	1001	1001	999999999999999	999999999999999	402	1	6	9	11	1	1	100	100	7	50	1	18	11	1	70	50	1	76	3	999	1	30	40	99	99	99	99	1	1	1	1	1	1	14	2	2
301763	201903101950	15063831250	30	20190310	15:02:52	3575	1	18	1001	1001	999999999999999	999999999999999	408	1	1	9	10	1	1	50	85	2	25	1	21	15	1	70	50	1	55	0	999	1	31	40	99	99	99	99	2	1	2	2	2	2	6	3	2
301771	201903102435	18263264346	30	20190310	16:57:19	856	1	18	1001	1001	999999999999999	999999999999999	406	1	1	1	10	1	1	999	0	2	20	2	23	15	1	38	20	1	999	99	999	9	30	40	99	99	99	99	9	9	9	9	9	9	0	9	5
301751	201903102863	17733949323	18	20190310	13:34:06	3500	1	18	1001	1001	999999999999999	999999999999999	335	1	1	9	10	1	1	0	90	3	90	2	24	12	1	44	50	1	79	1	999	1	31	40	99	99	99	99	1	1	2	2	2	2	8	3	2
301709	201903103098	18894147610	19	20190310	08:36:12	3701	1	18	1001	1001	999999999999999	999999999999999	390	1	6	7	14	5	8	0	60	1	0	2	27	9	1	41	11	1	90	0	999	1	32	40	99	99	99	99	1	2	1	2	2	2	5	3	2
301783	201903103301	17369802520	39	20190310	20:27:24	1127	1	18	1001	1001	999999999999999	999999999999999	406	1	1	1	10	1	1	0	0	2	80	2	18	10	1	35	16	1	999	99	999	9	99	40	99	99	99	99	9	9	9	9	9	9	0	9	3
301711	201903103839	15626128186	14	20190310	08:41:27	1212	1	18	1001	1001	999999999999999	999999999999999	410	1	1	9	10	1	1	30	90	2	70	1	24	16	1	52	50	1	999	0	999	9	30	40	99	99	99	99	9	9	9	9	9	9	1	9	5
301786	201903104645	15071204056	21	20190310	20:55:44	3592	1	18	1001	1001	999999999999999	999999999999999	388	1	5	9	24	1	1	999	60	1	0	1	33	16	1	39	5	1	999	0	999	9	30	40	99	99	99	99	9	9	9	9	9	9	0	9	5
301690	201903105381	13243658577	22	20190310	03:06:39	885	1	18	1001	1001	999999999999999	999999999999999	411	1	9	9	99	9	9	999	999	9	999	2	29	12	4	99	99	1	999	99	999	9	99	99	99	99	99	99	9	9	9	9	9	9	999	9	4
301788	201903105500	13955505510	11	20190310	22:12:11	1663	2	18	1001	1001	999999999999999	999999999999999	389	1	1	9	10	1	1	80	20	1	0	2	45	12	2	44	50	1	999	99	999	9	99	99	99	99	99	99	9	9	9	9	9	9	999	9	3
301729	201903106440	13653099762	14	20190310	09:33:35	2283	1	18	1001	1001	999999999999999	999999999999999	410	1	1	9	10	1	1	50	100	2	70	2	27	10	1	38	5	1	64	0	999	1	30	40	99	99	99	99	2	1	2	2	2	2	6	3	2
301685	201903106623	15761323095	16	20190310	00:51:19	4940	1	18	1001	1001	999999999999999	999999999999999	332	1	1	9	10	1	1	0	85	7	100	1	24	16	1	38	50	1	90	1	999	1	32	40	99	99	99	99	1	1	2	2	2	2	11	3	2
301741	201903107297	13585033961	24	20190310	12:09:36	3040	1	16	1001	1001	999999999999999	999999999999999	410	1	6	9	23	1	1	50	50	1	0	2	33	16	1	38	50	1	42	0	999	1	31	40	99	99	99	99	2	1	2	2	2	2	3	3	2
301790	201903108193	15226671438	18	20190310	22:23:12	2893	1	15	1001	1001	999999999999999	999999999999999	409	1	3	9	10	1	1	50	85	2	80	1	20	12	1	70	50	1	74	1	999	1	32	40	99	99	99	99	1	2	2	1	1	1	9	2	2
301700	201903108802	13085689870	39	20190310	05:51:53	3653	1	18	1001	1001	999999999999999	999999999999999	411	1	1	9	10	1	1	15	100	6	70	1	18	10	1	70	50	1	96	5	999	1	32	40	99	99	99	99	1	1	2	2	2	1	12	3	2
301697	201903109430	17694867521	10	20190310	04:27:13	1267	2	18	1001	1001	999999999999999	999999999999999	391	1	1	9	10	9	9	999	100	2	100	2	21	7	1	35	2	1	999	99	999	9	99	99	99	99	99	99	9	9	9	9	9	9	999	9	3
301755	201903109506	17661244449	10	20190310	14:02:13	2930	2	18	1001	1001	999999999999999	999999999999999	410	1	6	1	11	1	1	50	90	2	80	2	28	9	1	35	5	1	68	0	999	1	32	40	99	99	99	99	1	2	2	2	2	1	6	2	2
301789	201903109599	18696519032	40	20190310	22:48:16	2791	1	18	1001	1001	999999999999999	999999999999999	406	1	1	1	10	1	1	60	80	2	60	1	19	12	1	70	60	1	60	2	999	1	32	40	99	99	99	99	1	1	2	2	1	1	8	2	2
301818	201903110580	13861848657	24	20190311	09:34:12	3324	1	18	1001	1001	999999999999999	999999999999999	396	1	1	9	10	1	1	60	90	1	0	1	27	15	2	38	10	1	47	1	999	1	30	40	99	99	99	99	1	1	2	2	2	2	5	2	2
301807	201903110778	15255596654	11	20190311	08:07:23	2849	1	18	1001	1001	999999999999999	999999999999999	396	1	1	9	10	1	1	100	100	1	0	2	21	15	1	70	3	1	999	99	999	9	30	40	99	99	99	99	9	9	9	9	9	9	0	9	5
301845	201903110919	15226895659	30	20190311	15:33:25	741	1	99	1001	1001	999999999999999	999999999999999	117	1	9	9	99	9	9	999	999	2	999	2	36	99	3	43	60	1	999	99	999	9	99	99	99	99	99	99	9	9	9	9	9	9	999	9	4
301806	201903111101	18256089155	11	20190311	07:13:58	3652	1	18	1001	1001	999999999999999	999999999999999	389	1	6	9	23	5	2	45	88	1	0	2	28	16	1	38	50	1	50	0	999	1	30	40	99	99	99	99	1	2	1	2	2	2	5	2	2
301814	201903111566	15510557607	10	20190311	09:08:17	1360	1	18	1001	1001	999999999999999	999999999999999	396	1	1	9	10	1	1	80	60	1	0	1	44	16	2	38	50	1	999	99	999	9	99	99	99	99	99	99	9	9	9	9	9	9	999	9	3
301860	201903111618	13753113470	31	20190311	18:42:52	1103	1	18	1001	1001	999999999999999	999999999999999	383	1	9	9	99	9	9	999	999	9	999	1	25	99	1	38	99	1	999	99	999	9	99	99	99	99	99	99	9	9	9	9	9	9	999	9	4
301820	201903111708	15180114515	25	20190311	09:50:12	2367	1	18	1001	1001	999999999999999	999999999999999	410	1	1	9	10	1	1	10	85	2	50	2	24	16	1	39	1	1	70	0	999	1	32	40	99	99	99	99	1	2	2	2	1	2	6	3	2
301861	201903112789	13603454997	19	20190311	19:14:34	2448	1	18	1001	1001	999999999999999	999999999999999	335	1	1	9	10	1	1	60	80	2	70	2	19	13	1	70	9	1	33	2	999	1	31	40	99	99	99	99	1	1	2	2	2	2	9	3	2
301865	201903113192	15868100134	39	20190311	21:14:32	3570	1	18	1001	1001	999999999999999	999999999999999	408	1	1	9	10	1	1	100	999	1	0	2	27	9	1	21	3	1	7	0	999	1	30	40	99	99	99	99	2	2	2	1	2	1	2	2	2
301792	201903113474	18825523551	14	20190311	00:00:58	4670	1	18	1001	1001	999999999999999	999999999999999	406	1	1	1	10	1	1	999	999	2	80	2	25	15	1	38	3	1	86	2	999	5	32	40	99	99	99	99	2	1	2	2	2	2	6	2	2
301842	201903113808	13678580516	16	20190311	14:28:05	3226	1	18	1001	1001	999999999999999	999999999999999	410	1	1	9	10	1	1	100	50	1	0	1	18	11	1	70	8	1	34	0	999	1	31	40	99	99	99	99	2	2	2	2	1	2	2	3	2
301849	201903114170	17627669591	10	20190311	16:14:37	1390	1	18	1001	1001	999999999999999	999999999999999	383	1	1	9	10	1	1	90	100	1	0	1	22	17	1	70	99	1	999	99	999	9	99	99	99	99	99	99	9	9	9	9	9	9	999	9	3
301848	201903114699	13995190162	28	20190311	16:10:25	2644	3	18	1001	1001	999999999999999	999999999999999	335	1	1	9	10	1	1	50	100	2	90	1	49	16	2	52	50	1	999	99	999	9	99	99	99	99	99	99	9	9	9	9	9	9	999	9	3
301863	201903114784	15959793318	12	20190311	20:15:24	2976	1	18	1001	1001	999999999999999	999999999999999	408	1	1	9	10	1	1	60	40	1	0	2	21	13	1	70	1	1	29	0	999	1	30	40	99	99	99	99	2	2	2	2	1	2	1	3	2
301844	201903114885	15259950162	12	20190311	15:07:32	3158	1	18	1001	1001	999999999999999	999999999999999	402	1	1	9	10	1	1	10	100	1	0	2	18	9	1	35	50	1	71	0	999	1	32	40	99	99	99	99	1	1	2	2	2	2	6	2	2
301801	201903115347	18655052605	24	20190311	04:54:14	5105	2	18	1001	1001	999999999999999	999999999999999	409	1	1	9	10	1	1	0	90	2	70	2	28	9	1	52	60	1	72	2	999	1	32	40	99	99	99	99	1	1	2	2	1	1	10	2	2
301830	201903115637	19918608165	10	20190311	12:07:05	2640	2	18	1001	1001	999999999999999	999999999999999	410	1	6	9	16	1	1	80	75	1	0	2	36	16	2	22	8	1	14	0	999	1	30	40	99	99	99	99	2	2	2	2	2	2	2	3	2
301827	201903115638	15285073730	16	20190311	11:45:46	2416	1	11	1001	1001	999999999999999	999999999999999	396	1	1	9	10	1	1	80	999	1	0	2	20	12	1	21	50	1	27	0	999	1	30	40	99	99	99	99	2	2	2	2	2	2	0	2	2
301834	201903115737	15397915175	25	20190311	13:12:38	2524	1	18	1001	1001	999999999999999	999999999999999	396	1	1	9	10	1	1	60	999	1	0	1	22	15	1	70	3	1	999	99	999	9	99	99	99	99	99	99	9	9	9	9	9	9	999	9	3
301813	201903115825	17859180744	10	20190311	08:54:55	2499	2	18	1001	1001	999999999999999	999999999999999	410	1	6	9	11	1	1	0	100	1	0	2	26	9	1	52	60	1	999	99	999	9	99	99	99	99	99	99	9	9	9	9	9	9	999	9	3
301841	201903116373	15751877562	24	20190311	14:30:00	3120	5	18	1001	1001	999999999999999	999999999999999	396	1	6	9	11	1	2	1	98	1	0	1	23	16	1	70	6	1	76	2	999	1	30	40	99	99	99	99	1	1	1	2	2	2	8	2	2
301816	201903117357	18094226641	24	20190311	08:53:19	3317	1	18	1001	1001	999999999999999	999999999999999	402	1	6	9	11	1	1	50	100	2	999	1	18	11	1	70	50	1	48	3	999	1	31	40	99	99	99	99	2	1	2	2	2	2	6	2	2
301829	201903117697	18616011707	33	20190311	11:34:42	2308	1	18	1001	1001	999999999999999	999999999999999	360	1	1	9	10	1	1	999	50	1	0	1	25	18	1	70	2	1	999	99	999	9	30	40	99	99	99	99	9	9	9	9	9	9	0	9	3
301815	201903117713	18503856252	34	20190311	09:06:33	2440	4	18	1001	1001	999999999999999	999999999999999	117	1	6	5	23	1	1	40	50	2	50	2	26	16	1	38	2	1	999	99	999	9	99	99	99	99	99	99	9	9	9	9	9	9	999	9	3
301837	201903117836	18010583929	34	20190311	13:25:16	3577	2	18	1001	1001	999999999999999	999999999999999	402	1	2	9	10	1	1	50	90	2	50	1	21	12	1	52	50	1	70	3	999	1	30	40	99	99	99	99	1	1	1	2	1	1	11	2	2
301851	201903118579	13552196059	10	20190311	16:50:37	3568	5	18	1001	1001	15229043702	15210266528	408	1	6	5	12	1	1	20	100	2	90	1	26	15	1	38	3	1	94	3	999	1	32	40	99	99	99	99	1	2	1	2	2	1	8	2	2
301866	201903119050	13337855929	24	20190311	21:12:32	3570	1	18	1001	1001	999999999999999	999999999999999	335	1	1	9	10	1	1	50	95	1	0	2	22	12	1	38	4	1	68	0	999	1	31	40	99	99	99	99	1	1	2	2	2	2	6	3	2
301835	201903119648	18547600524	32	20190311	13:10:20	3245	1	18	1001	1001	999999999999999	999999999999999	410	1	1	9	10	1	2	20	80	2	35	2	19	6	1	38	60	1	89	0	999	4	32	40	99	99	99	99	1	2	2	1	2	2	7	3	2
301798	201903119926	15706975841	38	20190311	03:48:09	1071	1	18	1001	1001	999999999999999	999999999999999	388	1	1	9	10	1	1	999	999	1	0	1	20	12	1	52	50	1	999	99	999	9	99	99	99	99	99	99	9	9	9	9	9	9	999	9	4
301942	201903120185	15770680899	25	20190312	18:02:08	3140	1	18	1001	1001	999999999999999	999999999999999	117	1	1	9	10	1	1	999	89	2	999	1	20	12	1	70	50	1	999	99	999	9	99	99	99	99	99	99	9	9	9	9	9	9	999	9	3
301900	201903120200	15102922199	32	20190312	10:26:48	2141	1	18	1001	1001	999999999999999	999999999999999	403	1	1	1	10	1	1	60	80	2	5	2	24	15	1	38	50	1	49	1	999	1	30	40	99	99	99	99	1	1	2	2	2	2	6	2	2
301933	201903120206	15758689321	38	20190312	16:08:08	3830	1	18	1001	1001	999999999999999	999999999999999	410	1	1	9	10	1	1	10	90	2	70	1	18	9	1	70	50	1	89	2	999	1	32	40	99	99	99	99	1	2	2	1	1	1	9	2	2
301941	201903120312	13116600689	39	20190312	18:29:46	3313	1	18	1001	1001	999999999999999	999999999999999	396	1	6	5	11	1	1	75	60	1	0	2	23	17	1	70	50	1	56	0	999	1	31	40	99	99	99	99	1	2	2	2	2	2	3	2	2
301930	201903120549	18680391588	14	20190312	15:13:22	3625	1	18	1001	1001	999999999999999	999999999999999	402	1	6	9	24	1	1	20	90	2	70	2	32	16	1	52	9	1	100	0	999	1	32	40	99	99	99	99	2	1	2	2	2	2	6	2	2
301916	201903120994	15893763072	19	20190312	12:12:42	3678	1	18	1001	1001	999999999999999	999999999999999	403	1	1	1	10	1	1	0	100	2	90	2	33	16	2	39	50	1	62	0	999	1	30	40	99	99	99	99	2	2	2	2	2	1	4	2	2
301929	201903121020	18040538712	21	20190312	14:12:45	4585	1	18	1001	1001	999999999999999	999999999999999	403	1	6	9	25	1	1	30	60	7	50	1	31	15	1	52	12	1	55	99	999	1	30	40	99	99	99	99	1	2	2	2	2	2	8	2	2
301947	201903121616	15995763126	24	20190312	20:44:05	2607	1	88	1001	1001	999999999999999	999999999999999	396	1	1	9	10	1	1	999	70	2	90	1	20	14	1	70	2	1	54	0	999	2	31	40	99	99	99	99	1	2	2	2	2	2	4	2	2
301884	201903121853	15110613558	31	20190312	08:31:25	3685	1	18	1001	1001	999999999999999	999999999999999	404	1	1	9	10	1	1	50	100	2	0	2	23	9	1	52	50	1	94	0	999	1	32	40	99	99	99	99	1	1	2	2	2	1	8	2	2
301898	201903122203	13351321512	20	20190312	09:38:26	3751	1	18	1001	1001	999999999999999	999999999999999	124	1	1	1	10	1	1	20	80	2	50	1	29	16	2	39	50	1	50	0	999	1	30	40	99	99	99	99	1	1	2	2	1	2	8	3	2
301905	201903122450	18376655842	14	20190312	12:40:19	2473	1	18	1001	1001	999999999999999	999999999999999	402	1	1	9	10	1	1	40	50	2	50	1	25	16	1	38	2	1	55	0	999	1	31	40	99	99	99	99	1	2	2	2	2	2	5	2	2
301892	201903122785	18397366686	34	20190312	08:59:02	2415	1	18	1001	1001	999999999999999	999999999999999	403	1	1	1	10	1	1	999	999	2	75	1	21	16	1	70	60	1	78	0	999	1	32	40	99	99	99	99	1	1	2	9	9	9	5	9	5
301912	201903122842	15974080070	22	20190312	13:10:04	686	3	18	1001	1001	999999999999999	999999999999999	124	1	6	5	12	5	2	999	95	2	75	1	18	11	1	70	50	1	999	99	999	9	99	99	99	99	99	99	9	9	9	9	9	9	999	9	4
301917	201903123197	18831601195	18	20190312	13:52:17	3576	1	18	1001	1001	999999999999999	999999999999999	385	1	1	9	10	1	1	85	85	1	0	1	18	12	1	70	50	1	37	10	999	1	30	40	99	99	99	99	2	2	2	1	2	1	4	2	2
301890	201903124094	15029890003	32	20190312	08:04:23	3607	4	18	1001	1001	18609140818	999999999999999	124	1	6	6	12	1	1	30	80	2	80	1	36	16	2	40	50	1	88	0	999	1	32	40	99	99	99	99	1	1	2	2	1	1	9	3	2
301891	201903124214	17770147295	25	20190312	09:30:18	3743	1	18	1001	1001	999999999999999	999999999999999	385	1	6	9	11	5	2	30	80	2	80	2	18	10	1	52	50	1	73	1	999	1	30	40	99	99	99	99	1	1	2	1	2	2	8	2	2
301882	201903124242	18620941170	14	20190312	07:52:30	2618	1	18	1001	1001	999999999999999	999999999999999	408	1	1	9	10	1	1	20	100	2	90	2	19	9	1	52	70	1	59	0	999	1	30	40	99	99	99	99	1	1	2	2	2	1	8	2	2
301943	201903124415	17611210570	10	20190312	19:38:31	2869	1	18	1001	1001	999999999999999	999999999999999	386	1	1	9	10	1	1	90	80	2	30	1	20	12	2	88	5	1	41	0	999	1	30	40	99	99	99	99	1	1	2	2	2	1	6	2	2
301940	201903124555	17520225896	14	20190312	18:25:06	3225	1	18	1001	1001	999999999999999	999999999999999	386	1	1	9	10	1	1	40	95	2	80	2	21	12	1	21	2	1	76	0	999	1	32	40	99	99	99	99	1	1	2	2	2	2	7	2	2
301873	201903124581	15775125087	34	20190312	00:15:14	2289	1	18	1001	1001	999999999999999	999999999999999	408	1	1	9	10	1	1	0	0	2	999	2	18	11	1	70	50	1	999	99	999	9	99	99	99	99	99	99	9	9	9	9	9	9	999	9	3
301939	201903124680	13209667964	28	20190312	18:05:43	918	1	11	1001	1001	999999999999999	999999999999999	386	1	1	9	10	1	1	999	999	2	30	2	20	1	1	70	1	1	999	99	999	9	99	99	99	99	99	99	9	9	9	9	9	9	999	9	4
301899	201903124736	13678811833	30	20190312	10:51:53	3212	1	18	1001	1001	999999999999999	999999999999999	387	1	6	7	11	1	1	20	90	6	40	2	48	15	4	31	50	1	96	2	999	1	32	40	99	99	99	99	2	2	2	2	2	2	8	3	2
301953	201903124804	15390644746	13	20190312	20:41:09	3310	1	18	1001	1001	999999999999999	999999999999999	117	1	6	9	15	1	1	85	70	1	0	2	22	13	1	70	50	1	62	0	999	1	31	40	99	99	99	99	2	2	2	2	2	2	2	2	2
301932	201903125767	18679592607	25	20190312	16:12:03	1585	1	99	1001	1001	999999999999999	999999999999999	396	1	2	9	24	1	1	30	30	1	0	1	24	16	1	38	50	1	999	99	999	9	99	99	99	99	99	99	9	9	9	9	9	9	999	9	3
301954	201903126134	19853862386	30	20190312	22:06:42	3544	1	11	1001	1001	999999999999999	999999999999999	410	1	1	9	10	1	6	10	80	2	35	2	18	11	1	70	50	1	61	1	999	1	32	40	99	99	99	99	1	9	2	9	9	9	4	9	5
301915	201903126574	13775565909	24	20190312	13:40:26	3352	1	18	1001	1001	999999999999999	999999999999999	404	1	6	9	25	1	1	40	40	2	50	2	29	6	1	52	50	1	88	0	999	1	32	40	99	99	99	99	1	2	2	2	2	2	4	2	2
301926	201903127220	18538313170	19	20190312	14:47:07	2106	1	18	1001	1001	999999999999999	999999999999999	387	1	1	9	10	1	1	999	30	1	0	2	20	6	1	20	50	1	999	99	999	9	30	40	99	99	99	99	9	9	9	9	9	9	0	9	5
301881	201903127422	13860456520	12	20190312	06:42:03	3556	1	18	1001	1001	999999999999999	999999999999999	408	1	6	9	11	1	1	40	40	2	25	1	46	9	4	35	20	1	65	0	999	1	32	40	99	99	99	99	1	1	2	1	2	2	7	3	2
301920	201903128072	18360827697	24	20190312	13:49:18	3521	1	18	1001	1001	999999999999999	999999999999999	402	1	2	9	10	1	1	30	80	2	50	1	22	15	1	70	1	1	55	0	999	1	30	40	99	99	99	99	2	1	2	1	1	1	9	2	2
301956	201903128233	17611442008	30	20190312	22:53:35	1420	1	18	1001	1001	999999999999999	999999999999999	396	1	9	9	99	9	9	999	999	9	999	2	21	12	1	88	50	1	999	99	999	9	99	99	99	99	99	99	9	9	9	9	9	9	999	9	4
301937	201903128924	18187370284	10	20190312	17:04:23	1731	3	18	1001	1001	999999999999999	999999999999999	117	1	1	9	10	1	1	0	90	2	80	1	18	11	1	52	50	1	999	99	999	9	99	99	99	99	99	99	9	9	9	9	9	9	999	9	4
301875	201903129169	13518116404	34	20190312	01:33:16	1033	1	18	1001	1001	999999999999999	999999999999999	408	1	1	9	10	1	1	60	85	2	70	1	18	12	1	21	50	1	999	99	999	9	99	99	99	99	99	99	9	9	9	9	9	9	999	9	4
301876	201903129180	13928617985	14	20190312	02:21:32	3291	1	18	1001	1001	999999999999999	999999999999999	335	1	6	5	11	5	2	0	98	3	80	1	28	15	1	38	50	1	999	0	999	9	30	40	99	99	99	99	9	9	9	9	9	9	1	9	5
301889	201903129235	13722099561	27	20190312	08:52:56	3603	1	18	1001	1001	999999999999999	999999999999999	402	1	1	9	10	1	1	0	90	2	70	1	38	12	4	44	50	1	78	2	999	1	32	40	99	99	99	99	1	1	2	1	1	2	10	3	2
301879	201903129246	13178636772	14	20190312	06:18:43	4646	1	11	1001	1001	999999999999999	999999999999999	335	1	6	9	11	1	1	5	85	5	80	1	19	14	1	70	50	1	67	2	999	1	31	40	99	99	99	99	2	1	2	1	2	1	12	3	2
301888	201903129300	13975583033	22	20190312	08:12:18	3504	1	18	1001	1001	999999999999999	999999999999999	387	1	1	9	10	1	1	10	80	6	0	1	34	15	2	38	50	1	66	1	999	1	30	40	99	99	99	99	1	1	2	2	2	2	11	3	2
301874	201903129313	18618247220	10	20190312	00:56:48	2668	1	18	1001	1001	999999999999999	999999999999999	335	1	1	9	10	1	1	0	100	3	90	1	51	12	4	60	50	1	999	99	999	9	99	99	99	99	99	99	9	9	9	9	9	9	999	9	4
301921	201903129723	18508799449	34	20190312	13:35:55	2916	1	18	1001	1001	999999999999999	999999999999999	124	1	6	5	25	1	1	80	100	2	60	2	21	8	1	52	50	1	77	0	999	1	32	40	99	99	99	99	1	2	2	2	1	2	5	3	2
302042	201903130100	18865900799	30	20190313	19:14:00	3620	1	18	1001	1001	999999999999999	999999999999999	360	1	1	9	10	1	1	50	60	2	30	1	21	14	1	70	3	1	51	0	999	1	32	40	99	99	99	99	2	2	2	2	2	2	4	3	2
302049	201903130366	17637500434	19	20190313	22:59:46	1902	1	18	1001	1001	999999999999999	999999999999999	385	1	1	9	10	1	1	0	999	2	70	2	21	12	1	52	50	1	999	99	999	9	99	99	99	99	99	99	9	9	9	9	9	9	999	9	4
302018	201903130688	15191680281	32	20190313	16:13:56	3410	1	18	1001	1001	999999999999999	999999999999999	404	1	3	9	26	1	1	80	90	2	0	2	26	17	1	70	3	1	51	0	999	1	31	40	99	99	99	99	1	2	2	2	2	1	4	2	2
302048	201903130757	18125356032	14	20190313	22:45:45	3542	1	18	1001	1001	999999999999999	999999999999999	316	1	6	9	11	1	1	0	98	2	999	1	50	16	1	39	19	1	70	0	999	1	31	40	99	99	99	99	1	1	1	2	2	1	9	2	2
301970	201903132018	18326067296	11	20190313	04:26:01	828	1	18	1001	1001	999999999999999	999999999999999	410	1	9	9	99	9	9	999	999	9	999	1	19	15	1	39	50	1	999	99	999	9	99	99	99	99	99	99	9	9	9	9	9	9	999	9	4
301965	201903132961	18942322984	25	20190313	02:39:02	969	1	99	1001	1001	999999999999999	999999999999999	117	1	9	9	99	9	9	999	999	2	999	2	27	16	1	38	50	1	999	99	999	9	99	99	99	99	99	99	9	9	9	9	9	9	999	9	4
302005	201903133090	18177970085	15	20190313	12:26:44	1707	1	18	1001	1001	999999999999999	999999999999999	336	1	1	9	10	1	1	999	100	2	999	1	35	99	1	39	50	1	999	99	999	9	99	99	99	99	99	99	9	9	9	9	9	9	999	9	4
302009	201903133766	18983304930	40	20190313	14:22:02	2166	2	18	1001	1001	999999999999999	999999999999999	408	1	7	6	13	5	4	100	1	2	0	2	40	15	4	52	50	1	999	99	999	9	99	99	99	99	99	99	9	9	9	9	9	9	999	9	3
301966	201903134597	18801971162	33	20190313	03:22:40	3566	1	18	1001	1001	999999999999999	999999999999999	396	1	6	2	11	1	1	20	70	2	100	2	27	18	1	31	9	1	40	0	999	1	30	40	99	99	99	99	1	2	2	2	2	2	4	2	2
301962	201903134934	15991431300	32	20190313	02:01:13	2967	1	18	1001	1001	999999999999999	999999999999999	386	1	1	9	10	1	1	100	90	2	100	2	26	16	1	88	50	1	66	0	999	1	32	40	99	99	99	99	2	1	2	2	2	2	5	2	2
301995	201903134976	13507449269	22	20190313	11:17:06	1787	10	18	1001	1001	999999999999999	999999999999999	403	1	2	6	11	1	1	0	80	2	80	1	19	13	1	70	50	1	55	0	999	1	32	40	99	99	99	99	2	2	2	2	2	1	5	2	2
302001	201903135129	18722116999	35	20190313	12:08:57	826	1	18	1001	1001	999999999999999	999999999999999	408	1	9	9	99	9	9	999	999	2	999	1	18	11	1	70	50	1	999	99	999	9	99	99	99	99	99	99	9	9	9	9	9	9	999	9	4
301981	201903135258	15374887932	27	20190313	07:41:38	2114	1	99	1001	1001	999999999999999	999999999999999	117	1	6	9	16	1	1	999	999	7	999	1	18	11	1	70	50	1	999	99	999	9	99	99	99	99	99	99	9	9	9	9	9	9	999	9	4
302026	201903135347	13907913961	25	20190313	16:40:33	4206	1	18	1001	1001	999999999999999	999999999999999	402	1	1	9	10	1	1	99	100	4	99	2	23	16	1	44	50	1	999	99	999	9	99	99	99	99	99	99	9	9	9	9	9	9	999	9	3
302045	201903135486	15375705090	12	20190313	21:01:25	3650	1	11	1001	1001	999999999999999	999999999999999	402	1	6	9	16	1	5	80	90	6	0	2	18	11	1	70	50	1	56	1	999	1	30	40	99	99	99	99	2	1	2	2	2	2	5	2	2
301959	201903135622	17736887846	14	20190313	00:23:32	4382	1	11	1001	1001	999999999999999	999999999999999	386	1	6	9	24	1	1	15	999	4	75	2	21	10	1	35	60	1	63	0	999	1	30	40	99	99	99	99	1	1	2	1	2	1	11	2	2
302032	201903135650	13625375429	30	20190313	18:09:26	1495	1	18	1001	1001	999999999999999	999999999999999	385	1	9	9	99	9	9	999	999	7	999	2	18	10	1	70	50	1	999	99	999	9	99	99	99	99	99	99	9	9	9	9	9	9	999	9	4
302008	201903135894	13137131354	19	20190313	12:42:08	3697	1	18	1001	1001	999999999999999	999999999999999	403	1	5	9	26	1	1	25	50	2	80	2	23	15	1	44	50	1	51	0	999	1	32	40	99	99	99	99	1	1	2	1	2	1	8	2	2
302039	201903136185	13686295036	14	20190313	19:40:02	2499	1	18	1001	1001	999999999999999	999999999999999	385	1	6	9	11	1	1	35	35	1	0	1	33	12	1	52	60	1	999	99	999	9	99	99	99	99	99	99	9	9	9	9	9	9	999	9	3
302040	201903136389	15020177368	30	20190313	19:37:22	3233	2	18	1001	1001	999999999999999	999999999999999	316	1	1	9	10	1	1	0	95	3	95	1	19	12	1	70	50	1	61	0	999	1	32	40	99	99	99	99	1	2	2	1	2	2	6	2	2
302029	201903136438	15395531670	11	20190313	17:13:42	4253	1	18	1001	1001	999999999999999	999999999999999	316	1	6	7	11	5	2	0	90	7	90	1	19	13	1	70	70	1	67	20	999	1	32	40	99	99	99	99	1	2	2	2	2	1	10	3	2
302038	201903136640	15389132324	33	20190313	19:39:14	5141	1	18	1001	1001	999999999999999	999999999999999	404	1	1	9	10	1	1	1	99	6	99	2	23	9	1	52	4	1	96	5	999	1	32	40	99	99	99	99	1	2	1	2	2	2	10	2	2
301973	201903136834	15096008525	22	20190313	05:47:34	835	1	18	1001	1001	999999999999999	999999999999999	396	1	9	9	99	9	9	999	999	2	999	2	33	5	2	38	50	1	999	99	999	9	99	99	99	99	99	99	9	9	9	9	9	9	999	9	4
302011	201903137173	17742854721	34	20190313	14:27:56	3557	1	18	1001	1001	999999999999999	999999999999999	336	1	1	9	10	1	1	70	80	2	50	2	24	9	1	52	60	1	76	0	999	1	32	40	99	99	99	99	1	1	2	2	2	2	6	2	2
301987	201903137384	18365029606	11	20190313	09:33:00	896	1	18	1001	1001	999999999999999	999999999999999	408	1	1	9	10	1	1	50	40	1	0	2	30	15	1	21	1	1	999	99	999	9	99	99	99	99	99	99	9	9	9	9	9	9	999	9	3
302016	201903137567	15733052285	18	20190313	15:49:11	4417	1	99	1001	1001	999999999999999	999999999999999	408	1	1	9	10	1	1	20	90	5	999	2	21	14	1	70	50	1	999	99	999	9	99	99	99	99	99	99	9	9	9	9	9	9	999	9	3
301972	201903137739	18399215201	37	20190313	05:25:51	5664	1	18	1001	1001	999999999999999	999999999999999	410	1	1	9	10	1	1	0	100	5	99	2	26	15	1	38	50	1	37	0	999	1	30	40	99	99	99	99	2	1	1	1	2	1	11	3	2
301974	201903138149	17364029167	21	20190313	06:12:11	2566	1	18	1001	1001	999999999999999	999999999999999	396	1	6	7	11	1	1	0	100	2	80	1	43	9	2	21	1	1	57	0	999	1	30	40	99	99	99	99	1	2	1	2	2	2	6	2	2
301984	201903138225	18148294510	12	20190313	08:39:30	1558	1	18	1001	1001	999999999999999	999999999999999	403	1	1	1	10	1	1	999	999	2	999	2	22	16	1	38	1	1	999	99	999	9	99	99	99	99	99	99	9	9	9	9	9	9	999	9	4
302007	201903138545	17835682522	10	20190313	13:13:36	3138	1	18	1001	1001	999999999999999	999999999999999	336	1	1	9	10	1	1	0	95	2	50	2	23	16	1	70	50	1	53	0	999	1	30	40	99	99	99	99	2	1	2	2	2	1	7	3	2
302012	201903138790	18081208864	34	20190313	14:41:50	1251	1	18	1001	1001	999999999999999	999999999999999	403	1	6	9	11	5	2	40	90	2	50	1	20	15	1	70	50	1	999	99	999	9	30	40	99	99	99	99	9	9	9	9	9	9	0	9	5
301969	201903138833	15574850320	33	20190313	04:34:37	3235	1	18	1001	1001	999999999999999	999999999999999	396	1	6	9	11	1	1	50	85	1	0	1	25	17	1	70	1	1	49	1	999	1	30	40	99	99	99	99	1	1	2	2	2	1	7	2	2
302006	201903139357	13681452066	10	20190313	12:38:06	1103	23	10	1001	1001	999999999999999	999999999999999	408	1	5	9	26	1	1	999	999	9	999	1	30	16	1	39	4	1	999	99	999	9	99	99	99	99	99	99	9	9	9	9	9	9	999	9	4
301986	201903139498	13382101034	24	20190313	08:42:50	3579	5	18	1001	1001	999999999999999	999999999999999	387	1	5	9	26	1	1	100	50	1	0	1	19	15	1	70	50	1	69	0	999	1	32	40	99	99	99	99	2	1	2	1	1	2	6	2	2
302043	201903139717	18599217162	37	20190313	20:38:58	3117	1	18	1001	1001	999999999999999	999999999999999	316	1	1	9	10	1	1	15	90	2	15	1	18	12	1	70	50	1	76	0	999	2	32	40	99	99	99	99	1	2	2	2	2	2	5	3	2
302110	201903140166	15269328552	30	20190314	14:59:18	2623	1	18	1001	1001	999999999999999	999999999999999	412	1	1	9	10	1	1	30	75	2	50	1	47	6	2	44	50	1	90	0	999	1	32	40	99	99	99	99	2	1	2	2	2	2	6	2	2
302080	201903140310	13755685214	31	20190314	10:18:07	3705	1	18	1001	1001	999999999999999	999999999999999	409	1	5	9	10	1	1	0	100	6	72	2	23	15	1	34	60	1	999	99	999	9	99	99	99	99	99	99	9	9	9	9	9	9	999	9	3
302082	201903140484	18309254400	32	20190314	10:07:04	2051	1	18	1001	1001	999999999999999	999999999999999	411	1	1	9	10	1	1	25	60	2	30	1	36	12	2	44	50	1	999	99	999	9	99	99	99	99	99	99	9	9	9	9	9	9	999	9	3
302091	201903140655	13302157757	35	20190314	12:41:45	1343	1	18	1001	1001	999999999999999	999999999999999	389	1	1	9	10	1	1	50	65	1	0	2	23	15	1	38	50	1	999	99	999	9	99	99	99	99	99	99	9	9	9	9	9	9	999	9	3
302051	201903140738	18537180916	30	20190314	00:06:23	3634	1	18	1001	1001	999999999999999	999999999999999	360	1	1	9	10	1	1	999	90	1	0	2	28	9	2	44	60	1	40	0	999	1	30	40	99	99	99	99	2	1	2	2	2	2	3	3	2
302070	201903142580	3106260191	18	20190314	08:14:56	2684	2	18	1001	1001	999999999999999	999999999999999	389	1	6	9	24	1	1	75	75	1	0	2	46	16	2	39	50	1	34	0	999	1	30	40	99	99	99	99	1	1	2	2	2	2	4	2	2
302058	201903143434	13774118737	14	20190314	03:21:44	5508	1	18	1001	1001	999999999999999	999999999999999	385	1	1	9	10	1	1	80	100	4	80	2	31	16	1	44	70	1	62	1	999	1	30	40	99	99	99	99	1	1	2	2	2	1	11	2	2
302083	201903143630	13330118395	25	20190314	10:02:07	2656	1	18	1001	1001	999999999999999	999999999999999	124	1	6	6	11	5	2	80	0	1	30	1	52	15	4	60	20	1	30	0	999	1	30	40	99	99	99	99	1	2	2	2	2	1	3	2	2
302103	201903143841	15396275152	12	20190314	13:14:28	2448	1	18	1001	1001	999999999999999	999999999999999	124	1	1	1	10	1	1	30	90	2	70	1	21	16	1	70	4	1	79	0	999	1	32	40	99	99	99	99	1	2	2	2	2	2	5	3	2
302073	201903144306	18715002821	11	20190314	08:06:49	3662	1	18	1001	1001	999999999999999	999999999999999	411	1	6	9	16	5	1	70	70	2	0	2	33	15	1	52	50	1	61	0	999	1	32	40	99	99	99	99	2	2	2	2	2	2	3	3	2
302135	201903144514	13785355561	18	20190314	21:30:32	2917	2	18	1001	1001	999999999999999	999999999999999	390	1	1	1	10	1	1	60	50	1	0	1	52	12	2	39	50	1	999	0	999	9	30	40	99	99	99	99	9	9	9	9	9	9	1	9	5
302101	201903144940	15609986798	40	20190314	13:51:34	2821	1	18	1001	1001	999999999999999	999999999999999	412	1	6	9	11	1	2	0	0	2	50	2	43	15	2	52	60	1	80	0	999	1	30	40	99	99	99	99	1	2	2	2	2	1	5	3	2
302053	201903144957	13640975419	14	20190314	01:26:52	3375	1	18	1001	1001	999999999999999	999999999999999	316	1	5	9	26	1	1	0	80	2	60	1	24	16	1	39	50	1	69	1	999	3	32	40	99	99	99	99	2	2	2	2	2	2	6	3	2
302138	201903145304	18244795247	22	20190314	21:12:52	3603	1	18	1001	1001	999999999999999	999999999999999	403	1	6	5	13	1	7	40	85	2	70	2	20	9	1	52	50	1	91	0	999	1	32	40	99	99	99	99	1	1	2	1	2	1	9	2	2
302067	201903145627	13197357923	21	20190314	08:57:42	1619	1	18	1001	1001	999999999999999	999999999999999	406	1	6	6	23	1	1	30	60	2	70	2	36	16	1	35	2	1	999	0	999	9	30	40	99	99	99	99	9	9	9	9	9	9	1	9	5
302074	201903145679	18286155979	16	20190314	09:48:51	3390	1	18	1001	1001	999999999999999	999999999999999	412	1	6	9	23	1	1	100	25	1	0	2	18	9	1	70	50	1	17	0	999	1	30	40	99	99	99	99	2	2	2	1	2	1	2	3	2
302112	201903146321	13902936400	14	20190314	14:06:58	3660	2	14	1002	1001	999999999999999	999999999999999	389	1	1	9	10	1	1	20	50	2	60	1	18	10	1	70	18	1	76	0	999	1	32	40	99	99	99	99	1	2	2	2	1	2	6	2	2
302111	201903146599	13699111396	10	20190314	15:01:33	2107	2	18	1001	1001	999999999999999	999999999999999	406	1	6	6	11	1	1	10	95	4	999	1	30	16	2	44	10	1	83	0	999	1	32	40	99	99	99	99	1	1	2	2	2	1	8	2	2
302076	201903146976	18234754727	31	20190314	09:45:17	3667	1	18	1001	1001	999999999999999	999999999999999	391	1	1	9	10	1	1	70	95	2	10	1	28	12	1	52	50	1	82	0	999	1	32	40	99	99	99	99	1	1	2	2	2	2	6	3	2
302068	201903146983	18756037204	11	20190314	08:16:28	2749	1	18	1001	1001	999999999999999	999999999999999	391	1	1	9	10	1	1	70	70	2	20	1	25	16	1	39	50	1	63	0	999	1	32	40	99	99	99	99	2	2	2	2	2	1	4	3	2
302116	201903147226	18699296706	10	20190314	16:48:20	2172	1	18	1001	1001	999999999999999	999999999999999	390	1	1	1	10	1	1	999	999	1	0	1	18	13	1	70	60	1	999	99	999	9	99	99	99	99	99	99	9	9	9	9	9	9	999	9	3
302092	201903147447	15927350730	21	20190314	11:35:42	3682	1	11	1001	1001	999999999999999	999999999999999	124	1	1	1	10	1	1	80	90	2	85	1	22	16	1	70	50	1	55	0	999	1	31	40	99	99	99	99	1	1	1	2	1	2	8	3	2
302088	201903147638	18739067698	19	20190314	11:45:43	3329	1	18	1001	1001	999999999999999	999999999999999	391	1	1	9	10	1	1	999	85	2	15	2	25	15	1	52	50	1	40	0	999	1	30	40	99	99	99	99	1	1	2	2	2	2	5	3	2
302117	201903147724	18501078293	10	20190314	16:07:14	3148	1	18	1001	1001	999999999999999	999999999999999	336	1	1	9	10	1	1	999	90	1	0	1	29	19	1	52	3	1	36	0	999	1	30	40	99	99	99	99	2	2	2	2	2	1	2	3	2
302139	201903148233	18984588479	16	20190314	22:06:40	1582	1	18	1001	1001	999999999999999	999999999999999	315	1	1	9	10	1	1	35	60	1	0	2	18	11	1	70	13	1	999	1	999	9	30	40	99	99	99	99	9	9	9	9	9	9	1	9	5
302062	201903148530	15338770732	14	20190314	05:47:29	2155	1	18	1001	1001	999999999999999	999999999999999	404	1	1	9	10	1	1	10	100	2	50	2	56	12	2	43	15	1	58	1	999	1	32	40	99	99	99	99	1	2	2	2	2	2	6	2	2
302105	201903149408	19917315393	29	20190314	13:51:48	3569	1	11	1001	1001	999999999999999	999999999999999	411	1	1	9	10	1	1	10	99	2	25	2	18	9	1	52	50	1	81	1	999	1	32	40	99	99	99	99	1	1	2	1	1	1	11	3	2
302114	201903149434	18270740230	25	20190314	15:02:18	3175	1	18	1001	1001	999999999999999	999999999999999	391	1	6	5	11	5	2	20	75	2	70	2	21	15	1	70	50	1	84	0	999	1	32	40	99	99	99	99	1	2	2	1	2	2	6	3	2
302057	201903149655	13368125743	40	20190314	02:23:25	2451	2	18	1001	1001	999999999999999	999999999999999	360	1	6	9	16	5	5	999	999	1	0	2	24	10	1	52	5	1	999	99	999	9	99	99	99	99	99	99	9	9	9	9	9	9	999	9	3
302097	201903149689	13593069257	31	20190314	13:44:44	1308	1	18	1001	1001	999999999999999	999999999999999	406	1	6	6	11	1	1	10	70	2	80	1	18	99	1	70	18	1	999	2	999	9	30	40	99	99	99	99	9	9	9	9	9	9	2	9	5
302066	201903149993	18500339679	10	20190314	08:31:02	3682	1	18	1001	1001	999999999999999	999999999999999	409	1	1	9	10	1	1	0	80	5	80	2	29	15	1	38	10	1	74	0	999	1	32	40	99	99	99	99	1	2	2	2	1	2	9	2	2
302222	201903150063	18302651197	16	20190315	14:24:09	3661	1	18	1001	1001	999999999999999	999999999999999	401	1	6	5	11	5	2	30	80	2	35	2	45	20	1	39	8	1	70	0	999	1	32	40	99	99	99	99	1	2	2	2	2	2	5	2	2
302218	201903150232	18638109770	19	20190315	13:34:38	3055	1	18	1001	1001	999999999999999	999999999999999	408	1	1	9	10	1	1	10	100	2	90	2	30	12	4	52	50	1	84	0	999	1	32	40	99	99	99	99	1	2	2	2	2	2	5	3	2
302226	201903150765	13734477829	30	20190315	14:30:27	601	1	99	1001	1001	999999999999999	999999999999999	388	1	1	9	10	1	1	999	999	2	999	2	19	99	9	99	50	1	999	99	999	9	99	99	99	99	99	99	9	9	9	9	9	9	999	9	4
302205	201903152025	18883307310	34	20190315	10:36:11	3087	1	11	1001	1001	999999999999999	999999999999999	383	1	1	9	10	1	1	100	80	2	25	1	20	16	1	70	4	1	19	0	999	1	30	40	99	99	99	99	2	2	2	2	2	2	2	3	2
302169	201903152483	13691012088	10	20190315	03:22:07	3322	4	18	1001	1001	999999999999999	999999999999999	315	1	6	9	25	1	1	30	80	2	30	1	30	16	2	38	50	1	46	0	999	1	30	40	99	99	99	99	1	1	2	2	2	2	6	3	2
302208	201903152741	18595151945	32	20190315	12:17:08	3700	3	18	1001	1001	999999999999999	999999999999999	408	1	6	9	12	5	2	10	100	2	50	2	24	16	1	50	50	1	74	1	999	1	32	40	99	99	99	99	1	1	2	2	2	2	8	3	2
302170	201903152860	13659366763	13	20190315	04:16:29	1326	2	18	1001	1001	999999999999999	999999999999999	387	1	1	9	10	1	1	0	100	2	999	1	25	16	1	34	50	1	96	2	999	4	32	40	99	99	99	99	1	1	1	2	2	1	11	2	2
302242	201903152922	13977081327	15	20190315	17:41:35	834	1	14	1001	1001	999999999999999	999999999999999	411	1	8	9	10	1	1	999	999	5	999	1	32	16	2	40	50	1	999	99	999	9	99	99	99	99	99	99	9	9	9	9	9	9	999	9	4
302204	201903153303	18930512151	33	20190315	10:38:57	2517	1	18	1001	1001	999999999999999	999999999999999	406	1	1	1	10	1	1	40	80	2	60	1	35	15	2	52	10	1	49	0	999	1	30	40	99	99	99	99	1	1	2	2	2	2	5	2	2
302244	201903153633	17582806356	10	20190315	18:56:25	690	1	18	1001	1001	999999999999999	999999999999999	360	1	1	9	10	1	1	999	999	9	999	1	24	16	1	39	6	1	999	99	999	9	99	99	99	99	99	99	9	9	9	9	9	9	999	9	4
302183	201903153737	15231125871	18	20190315	08:18:02	1615	3	18	1001	1001	999999999999999	999999999999999	408	1	6	9	16	1	1	60	50	1	0	1	29	12	1	52	50	1	999	99	999	9	99	99	99	99	99	99	9	9	9	9	9	9	999	9	3
302164	201903154027	13195109625	16	20190315	01:59:05	2890	1	18	1001	1001	999999999999999	999999999999999	336	1	1	9	10	1	1	60	999	1	0	1	21	16	1	70	50	1	44	0	999	1	30	40	99	99	99	99	1	2	2	2	2	2	1	2	2
302189	201903154182	18505309086	30	20190315	08:40:44	2383	3	18	1001	1001	999999999999999	999999999999999	401	1	1	9	10	1	1	40	90	2	999	2	19	12	1	70	50	1	999	99	999	9	99	99	99	99	99	99	9	9	9	9	9	9	999	9	3
302241	201903154362	17806916469	38	20190315	17:39:31	682	1	18	1001	1001	999999999999999	999999999999999	360	1	1	9	10	1	1	999	999	9	999	2	20	15	1	42	50	1	999	99	999	9	99	99	99	99	99	99	9	9	9	9	9	9	999	9	4
302172	201903154413	15286939697	19	20190315	05:19:17	3547	1	18	1001	1001	999999999999999	999999999999999	387	1	1	9	10	1	1	70	50	1	0	2	21	9	1	52	50	1	59	1	999	3	32	40	99	99	99	99	2	2	2	2	2	2	4	3	2
302181	201903154703	15563351250	30	20190315	08:13:26	1885	1	18	1001	1001	999999999999999	999999999999999	383	1	6	9	13	1	4	30	40	2	10	2	35	16	1	39	50	1	67	0	999	1	32	40	99	99	99	99	1	1	2	2	1	1	8	3	2
302191	201903154708	13061496671	30	20190315	08:55:05	3936	1	18	1001	1001	999999999999999	999999999999999	388	1	1	9	10	1	1	50	100	1	0	2	19	12	1	70	50	1	45	0	999	1	30	40	99	99	99	99	1	1	2	2	2	2	5	3	2
302174	201903154920	19969666069	10	20190315	06:12:32	1195	1	18	1001	1001	999999999999999	999999999999999	336	1	6	7	12	1	1	999	999	9	999	2	35	99	1	44	50	1	999	99	999	9	99	99	99	99	99	99	9	9	9	9	9	9	999	9	4
302217	201903154996	15720577602	11	20190315	13:13:41	2610	1	18	1001	1001	999999999999999	999999999999999	383	1	1	9	10	1	1	999	95	3	95	1	18	11	1	70	50	1	92	1	999	1	32	40	99	99	99	99	1	1	2	1	1	2	9	3	2
302165	201903155684	18616300744	14	20190315	01:52:22	3356	1	18	1001	1001	999999999999999	999999999999999	403	1	5	9	26	1	1	0	100	2	50	2	26	9	1	52	60	1	64	2	999	1	32	40	99	99	99	99	1	1	2	2	2	2	8	2	2
302232	201903156193	18171023032	33	20190315	14:56:19	3500	1	18	1001	1001	999999999999999	999999999999999	408	1	5	9	26	1	1	999	80	1	0	2	22	14	1	70	70	1	87	0	999	1	32	40	99	99	99	99	1	1	2	2	2	2	6	2	2
302234	201903156363	17640057367	26	20190315	15:05:22	3329	1	88	1001	1001	999999999999999	999999999999999	388	1	6	9	24	1	1	40	80	1	0	1	24	15	2	44	2	1	45	0	999	1	30	40	99	99	99	99	1	1	2	1	2	2	6	3	2
302229	201903156379	17600882525	10	20190315	14:22:59	1223	1	99	1001	1001	999999999999999	999999999999999	409	1	1	9	10	1	1	50	90	2	80	2	24	99	1	38	4	1	999	99	999	9	99	99	99	99	99	99	9	9	9	9	9	9	999	9	3
302255	201903156458	15853068275	30	20190315	22:15:56	2907	25	15	1001	1001	5303950053	999999999999999	412	1	6	5	11	1	2	60	60	2	50	1	30	15	4	32	50	1	55	2	999	4	31	40	99	99	99	99	1	1	2	1	2	1	10	3	2
302223	201903157012	19999141981	37	20190315	14:25:35	2828	1	18	1001	1001	999999999999999	999999999999999	335	1	1	9	10	1	1	50	70	2	80	1	18	12	1	70	18	1	92	1	999	1	32	40	99	99	99	99	1	2	2	1	2	2	7	3	2
302235	201903157116	18810468782	10	20190315	14:54:52	1882	1	18	1001	1001	999999999999999	999999999999999	383	1	1	9	10	1	1	999	999	2	999	1	21	16	1	70	3	1	999	99	999	9	99	99	99	99	99	99	9	9	9	9	9	9	999	9	3
302203	201903157722	18522920682	35	20190315	10:37:02	3087	1	18	1001	1001	999999999999999	999999999999999	388	1	1	9	10	1	1	55	50	2	25	2	27	99	4	38	50	1	46	0	999	1	30	40	99	99	99	99	1	1	2	1	1	1	8	3	2
302163	201903157799	18846741122	20	20190315	02:25:18	3984	1	18	1001	1001	999999999999999	999999999999999	390	1	1	1	10	1	1	999	999	4	999	2	33	16	2	38	7	1	999	99	999	9	99	99	99	99	99	99	9	9	9	9	9	9	999	9	4
302253	201903157903	13142509759	24	20190315	21:47:12	833	1	18	1001	1001	999999999999999	999999999999999	412	1	9	9	99	9	9	999	999	9	999	2	18	12	1	70	50	1	999	99	999	9	99	99	99	99	99	99	9	9	9	9	9	9	999	9	4
302214	201903158499	13959252043	12	20190315	13:08:58	2770	1	18	1001	1001	999999999999999	999999999999999	335	1	6	5	25	5	2	30	90	2	10	1	18	13	1	70	70	1	69	0	999	1	32	40	99	99	99	99	2	1	2	2	2	1	7	3	2
302171	201903158556	17746846499	39	20190315	04:36:15	3675	1	18	1001	1001	999999999999999	999999999999999	315	1	6	9	11	1	1	0	75	6	60	1	19	12	1	70	50	1	81	4	999	3	32	40	99	99	99	99	2	1	2	2	2	2	8	3	2
302154	201903159367	18286673698	16	20190315	00:12:38	2189	3	18	1001	1001	999999999999999	999999999999999	336	1	1	9	10	1	1	50	0	1	0	1	18	11	1	70	50	1	11	0	999	1	30	40	99	99	99	99	2	2	2	2	2	2	1	3	2
302201	201903159506	17396175996	21	20190315	10:11:27	3149	1	18	1001	1001	999999999999999	999999999999999	335	1	1	9	10	1	1	50	70	1	0	2	20	15	1	70	3	1	45	0	999	1	30	40	99	99	99	99	1	1	2	2	2	2	5	3	2
302352	201903160261	18738809857	19	20190316	19:06:54	3038	1	18	1001	1001	999999999999999	999999999999999	389	1	1	9	10	1	1	5	80	2	55	1	19	12	1	70	50	1	81	1	999	1	30	40	99	99	99	99	2	2	2	2	2	2	5	2	2
302349	201903160781	18315827328	30	20190316	16:31:25	3620	1	18	1001	1001	999999999999999	999999999999999	389	1	1	9	10	1	1	0	70	2	90	1	19	14	1	70	50	1	58	0	999	1	31	40	99	99	99	99	1	1	2	2	1	1	9	2	2
302303	201903160847	19935015612	31	20190316	09:37:44	2002	2	10	1001	1001	999999999999999	999999999999999	396	1	1	9	10	1	1	80	999	1	0	1	60	16	6	39	50	1	999	99	999	9	99	99	99	99	99	99	9	9	9	9	9	9	999	9	3
302310	201903161424	18189857492	39	20190316	10:51:31	3526	1	18	1001	1001	999999999999999	999999999999999	408	1	5	9	26	1	1	60	70	2	40	1	22	99	1	39	50	1	47	0	999	1	30	40	99	99	99	99	1	2	2	2	1	2	4	3	2
302280	201903161493	17661557729	30	20190316	08:00:11	3561	1	18	1001	1001	999999999999999	999999999999999	396	1	3	9	26	1	1	0	999	2	0	2	19	12	1	70	50	1	60	2	999	2	32	40	99	99	99	99	1	2	2	2	2	2	5	2	2
302305	201903162193	18598110626	14	20190316	09:35:37	3663	1	18	1001	1001	999999999999999	999999999999999	335	1	1	9	10	1	1	50	100	2	100	1	19	13	1	70	50	1	94	0	999	1	32	40	99	99	99	99	1	1	2	2	2	2	7	3	2
302309	201903162736	17316561801	33	20190316	10:17:12	3654	1	18	1001	1001	999999999999999	999999999999999	383	1	1	9	10	1	1	70	80	2	20	2	41	16	7	34	60	1	81	0	999	1	32	40	99	99	99	99	1	1	2	2	2	2	6	3	2
302335	201903165864	18724621325	35	20190316	14:21:07	2550	1	18	1001	1001	999999999999999	999999999999999	383	1	1	9	10	1	1	999	99	5	90	2	22	16	1	42	60	1	85	0	999	1	32	40	99	99	99	99	2	1	1	2	2	1	10	3	2
302344	201903166015	15836395978	19	20190316	16:51:16	1289	1	18	1001	1001	999999999999999	999999999999999	406	1	6	6	25	1	1	0	90	1	0	1	22	14	1	70	20	1	64	0	999	1	32	40	99	99	99	99	9	9	2	9	9	9	2	9	5
302270	201903166256	17390915543	10	20190316	05:07:38	3282	1	18	1001	1001	999999999999999	999999999999999	412	1	5	2	24	1	1	999	100	2	50	1	22	16	1	70	50	1	59	10	999	4	31	40	99	99	99	99	1	1	2	1	1	1	11	3	2
302333	201903166610	17331888855	18	20190316	13:32:33	4286	1	18	1001	1001	999999999999999	999999999999999	410	1	1	9	10	1	1	75	100	7	55	2	22	12	1	35	50	1	47	0	999	1	30	40	99	99	99	99	2	1	2	2	2	2	7	3	2
302289	201903167113	13585949173	33	20190316	08:04:48	2407	1	18	1001	1001	999999999999999	999999999999999	117	1	1	9	10	1	1	40	80	2	30	1	37	15	1	21	50	1	81	0	999	1	32	40	99	99	99	99	1	2	2	2	2	2	5	3	2
302357	201903167247	18600897267	10	20190316	21:23:25	3946	1	14	1001	1001	999999999999999	999999999999999	409	1	6	5	12	5	4	999	999	4	0	1	19	13	1	70	50	1	999	0	999	9	30	40	99	99	99	99	9	9	9	9	9	9	1	9	5
302263	201903167917	15010135587	10	20190316	00:59:11	3033	2	18	1001	1001	999999999999999	999999999999999	360	1	6	9	11	1	1	10	80	1	0	2	34	16	2	38	50	1	80	0	999	3	32	40	99	99	99	99	1	1	2	2	2	2	8	3	2
302348	201903167968	18689769980	17	20190316	17:29:25	3549	1	18	1001	1001	999999999999999	999999999999999	406	1	1	1	10	1	1	50	5	1	0	2	18	11	1	70	18	1	73	0	999	1	32	40	99	99	99	99	1	1	2	2	2	2	6	2	2
302346	201903168406	13555545853	20	20190316	16:29:18	3504	1	18	1001	1001	999999999999999	999999999999999	409	1	6	9	11	5	2	0	100	6	100	1	23	9	1	52	50	1	94	2	999	1	32	40	99	99	99	99	2	1	1	2	1	2	12	2	2
302337	201903168830	15620064291	35	20190316	14:29:54	3055	1	18	1001	1001	999999999999999	999999999999999	408	1	6	5	14	5	2	25	85	2	65	2	27	16	1	38	50	1	51	0	999	1	31	40	99	99	99	99	2	2	2	2	2	2	4	3	2
302279	201903169172	15369710339	18	20190316	07:30:56	1819	2	18	1001	1001	999999999999999	999999999999999	360	1	6	9	11	1	1	0	90	1	0	2	35	9	1	52	50	1	62	0	999	1	32	40	99	99	99	99	1	2	2	2	2	2	4	3	2
302338	201903169180	18147007161	35	20190316	14:40:34	3526	1	18	1001	1001	999999999999999	999999999999999	396	1	1	9	10	1	1	20	100	6	50	2	20	13	1	70	70	1	96	2	999	3	32	40	99	99	99	99	1	1	1	2	2	1	11	2	2
302331	201903169858	15565162766	19	20190316	13:29:23	1939	1	11	1001	1001	999999999999999	999999999999999	408	1	1	9	10	1	1	80	65	1	0	2	18	11	1	70	50	1	38	0	999	1	30	40	99	99	99	99	2	2	2	2	2	1	2	3	2
302410	201903170142	13952691507	24	20190317	14:55:28	2156	1	18	1001	1001	999999999999999	999999999999999	411	1	1	9	10	1	1	50	65	2	50	1	18	11	1	70	50	1	65	2	999	1	32	40	99	99	99	99	2	2	2	1	2	1	7	3	2
302371	201903171351	18726867514	11	20190317	06:43:47	4717	1	18	1001	1001	999999999999999	999999999999999	406	1	1	1	10	1	1	30	80	4	50	2	27	9	1	52	2	1	94	0	999	5	32	40	99	99	99	99	2	1	2	2	2	1	8	2	2
302413	201903171438	18860398905	19	20190317	16:07:00	3847	2	18	1001	1001	999999999999999	999999999999999	401	1	6	5	11	5	2	30	70	1	0	1	22	16	1	70	50	1	83	1	999	1	32	40	99	99	99	99	1	2	2	2	2	2	6	2	2
302361	201903171564	13951618426	24	20190317	00:28:35	3315	1	18	1001	1001	999999999999999	999999999999999	409	1	1	9	10	1	1	45	65	1	0	1	19	12	1	70	50	1	64	0	999	1	32	40	99	99	99	99	1	1	2	2	1	2	7	2	2
302372	201903171697	18685833905	40	20190317	07:06:29	2308	1	18	1001	1001	999999999999999	999999999999999	389	1	6	9	11	1	1	0	98	7	88	1	19	11	1	38	2	1	999	99	999	9	99	99	99	99	99	99	9	9	9	9	9	9	999	9	3
302375	201903172500	17785288479	12	20190317	08:14:07	1691	1	18	1001	1001	999999999999999	999999999999999	117	1	1	9	10	1	1	100	70	2	100	2	18	12	1	52	60	1	999	99	999	9	99	99	99	99	99	99	9	9	9	9	9	9	999	9	4
302415	201903173245	13716076174	37	20190317	17:17:37	3705	3	18	1001	1001	999999999999999	999999999999999	335	1	5	6	11	4	1	10	80	2	70	2	31	19	3	39	50	1	96	1	999	1	32	40	99	99	99	99	1	1	2	2	2	2	8	3	2
302401	201903173790	15516370276	19	20190317	13:38:15	3386	2	18	1001	1001	999999999999999	999999999999999	410	1	3	9	24	2	1	0	90	2	60	2	20	12	1	52	2	1	83	0	999	1	32	40	99	99	99	99	1	2	1	2	2	2	6	3	2
302408	201903174524	13932908046	18	20190317	14:15:48	2266	1	18	1001	1001	999999999999999	999999999999999	117	1	6	9	11	1	1	999	999	1	0	2	40	12	2	38	50	1	999	99	999	9	99	99	99	99	99	99	9	9	9	9	9	9	999	9	3
302392	201903175182	17685519126	30	20190317	11:38:31	3629	1	18	1001	1001	999999999999999	999999999999999	117	1	1	9	10	1	1	0	90	2	50	1	32	12	4	21	50	1	91	0	999	1	32	40	99	99	99	99	1	2	2	2	2	2	5	3	2
302394	201903175401	13475375545	30	20190317	12:22:52	2532	20	18	1001	1001	999999999999999	999999999999999	377	1	5	9	24	4	1	50	80	1	0	1	37	15	4	39	50	1	999	99	999	9	99	99	99	99	99	99	9	9	9	9	9	9	999	9	3
302368	201903175501	18000350206	18	20190317	04:01:56	3956	1	18	1001	1001	999999999999999	999999999999999	388	1	6	9	11	1	1	20	75	2	60	1	22	15	1	52	50	1	60	5	999	3	30	40	99	99	99	99	1	1	1	1	1	2	12	3	2
302416	201903176045	13117782506	15	20190317	18:25:59	634	3	99	1001	1001	17607801765	999999999999999	401	1	6	9	11	9	9	999	999	6	999	2	19	11	1	70	99	1	999	99	999	9	99	99	99	99	99	99	9	9	9	9	9	9	999	9	9
302364	201903176485	17501490981	24	20190317	01:50:53	2725	1	18	1001	1001	999999999999999	999999999999999	409	1	1	9	10	1	1	30	85	2	999	2	28	12	1	38	50	1	66	0	999	1	32	40	99	99	99	99	2	2	1	2	2	2	5	2	2
302419	201903177579	13677636592	40	20190317	20:46:14	2361	1	18	1001	1001	999999999999999	999999999999999	383	1	1	9	10	1	1	30	45	2	50	1	19	12	1	70	50	1	85	4	999	1	32	40	99	99	99	99	1	1	1	2	1	2	9	3	2
302407	201903177920	15827130486	21	20190317	15:01:58	3371	1	18	1001	1001	999999999999999	999999999999999	410	1	6	9	12	5	2	10	65	2	60	1	20	12	1	70	60	1	66	0	999	1	32	40	99	99	99	99	2	1	2	2	2	2	6	3	2
302376	201903179003	13411493245	14	20190317	08:28:38	2432	1	18	1001	1001	999999999999999	999999999999999	402	1	1	9	10	1	1	999	999	5	999	2	27	9	1	21	4	1	999	99	999	9	99	99	99	99	99	99	9	9	9	9	9	9	999	9	4
302370	201903179287	13251200826	40	20190317	05:39:37	1432	1	18	1001	1001	999999999999999	999999999999999	389	1	6	9	11	5	1	30	73	2	80	1	24	15	1	70	50	1	999	99	999	9	99	99	99	99	99	99	9	9	9	9	9	9	999	9	3
302369	201903179421	13708485639	38	20190317	03:58:18	3617	1	18	1001	1001	999999999999999	999999999999999	389	1	1	9	10	1	1	30	75	2	75	2	25	16	1	38	50	1	88	1	999	1	32	40	99	99	99	99	1	2	2	2	1	1	8	2	2
302454	201903181266	13970825553	25	20190318	14:04:18	1495	1	18	1001	1001	999999999999999	999999999999999	402	1	1	9	10	1	1	0	100	2	80	2	33	9	1	52	50	1	999	99	999	9	99	99	99	99	99	99	9	9	9	9	9	9	999	9	3
302450	201903181371	15819317604	14	20190318	12:07:46	5362	1	18	1001	1001	999999999999999	999999999999999	387	1	1	9	10	1	1	0	100	5	90	1	26	15	2	52	50	1	93	1	999	1	32	40	99	99	99	99	1	2	2	2	2	2	9	2	2
302468	201903181563	15343731913	19	20190318	18:01:25	3274	1	18	1001	1001	999999999999999	999999999999999	386	1	5	9	24	1	1	30	70	1	0	1	22	16	1	70	50	1	57	0	999	1	32	40	99	99	99	99	1	1	2	2	2	2	6	2	2
302460	201903181801	15010109952	10	20190318	15:07:24	2140	1	18	1001	1001	999999999999999	999999999999999	403	1	1	1	10	1	1	999	999	9	999	1	55	15	2	39	50	1	999	99	999	9	99	99	99	99	99	99	9	9	9	9	9	9	999	9	4
302467	201903183006	18275774992	15	20190318	16:48:33	3422	1	18	1001	1001	999999999999999	999999999999999	117	1	5	9	24	1	1	30	60	2	40	1	27	16	1	38	50	1	67	0	999	1	32	40	99	99	99	99	1	2	2	2	2	2	5	2	2
302475	201903183885	13076005626	38	20190318	19:32:13	2725	1	18	1001	1001	999999999999999	999999999999999	386	1	1	9	10	1	1	0	90	2	80	1	25	16	1	88	50	1	92	0	999	5	32	40	99	99	99	99	2	1	2	2	2	1	8	2	2
302487	201903184715	15647185509	27	20190318	23:24:17	1125	1	18	1001	1001	999999999999999	999999999999999	396	1	9	9	99	9	9	999	999	9	999	2	18	12	1	70	50	1	999	99	999	9	99	99	99	99	99	99	9	9	9	9	9	9	999	9	4
302446	201903185501	13476717986	21	20190318	11:44:25	775	1	13	1001	1001	999999999999999	999999999999999	385	1	9	9	99	9	9	999	999	2	999	2	20	15	1	52	99	1	999	99	999	9	99	99	99	99	99	99	9	9	9	9	9	9	999	9	4
302447	201903185580	17621653667	33	20190318	10:22:46	2676	1	18	1001	1001	999999999999999	999999999999999	403	1	1	1	10	1	1	50	85	1	0	1	27	16	1	38	2	1	72	0	999	1	32	40	99	99	99	99	1	2	2	2	1	2	5	2	2
302481	201903186130	17758767931	12	20190318	21:26:25	874	1	18	1001	1001	999999999999999	999999999999999	386	1	1	9	10	1	1	999	999	9	999	2	25	15	1	38	4	1	999	99	999	9	99	99	99	99	99	99	9	9	9	9	9	9	999	9	4
302459	201903186202	13324305421	23	20190318	15:01:39	3159	2	18	1001	1001	999999999999999	999999999999999	402	1	5	9	24	1	1	90	70	1	0	2	19	13	1	70	1	1	24	0	999	1	30	40	99	99	99	99	2	2	2	2	2	1	2	2	2
302440	201903186225	19834437907	31	20190318	09:24:09	3608	1	18	1001	1001	999999999999999	999999999999999	385	1	5	9	24	1	1	50	75	1	0	1	22	15	1	70	50	1	19	0	999	1	30	40	99	99	99	99	2	2	2	2	2	2	2	2	2
302442	201903186269	15209670951	28	20190318	08:48:13	2611	1	18	1001	1001	999999999999999	999999999999999	403	1	1	1	10	1	1	50	999	2	70	2	36	16	2	38	50	1	999	99	999	9	99	99	99	99	99	99	9	9	9	9	9	9	999	9	3
302435	201903186616	15220652302	14	20190318	08:27:06	3055	1	18	1001	1001	999999999999999	999999999999999	402	1	1	9	10	1	1	50	100	1	0	2	23	9	1	35	70	1	31	0	999	1	30	40	99	99	99	99	2	1	2	2	2	1	5	2	2
302489	201903186621	15923175154	40	20190318	20:50:40	4084	1	18	1001	1001	999999999999999	999999999999999	117	1	5	9	24	1	1	50	65	2	50	1	20	14	1	70	2	1	81	1	999	1	32	40	99	99	99	99	1	2	2	2	2	1	7	2	2
302469	201903186972	17665677080	14	20190318	18:36:24	852	1	18	1001	1001	999999999999999	999999999999999	396	1	6	9	24	1	1	999	999	9	999	2	24	12	1	52	4	1	999	99	999	9	99	99	99	99	99	99	9	9	9	9	9	9	999	9	4
302482	201903187125	13575857315	10	20190318	22:12:47	3567	1	18	1001	1001	999999999999999	999999999999999	410	1	5	9	24	1	1	55	75	2	65	2	21	12	1	52	60	1	81	0	999	1	32	40	99	99	99	99	1	2	2	1	2	1	6	2	2
302438	201903187244	13055779880	33	20190318	08:08:04	3587	1	18	1001	1001	999999999999999	999999999999999	387	1	6	9	11	1	1	20	0	2	80	1	25	9	4	38	70	1	71	1	999	1	32	40	99	99	99	99	2	2	2	1	2	1	6	2	2
302448	201903187650	13391828983	10	20190318	12:05:00	3500	1	18	1001	1001	999999999999999	999999999999999	402	1	1	9	10	1	1	100	80	1	0	2	28	16	2	44	7	1	90	0	999	1	32	40	99	99	99	99	1	1	2	2	2	1	6	3	2
302464	201903188855	15269279521	30	20190318	16:08:36	3587	1	18	1001	1001	999999999999999	999999999999999	410	1	1	9	10	1	1	0	100	5	95	1	31	16	1	39	50	1	100	0	999	1	32	40	99	99	99	99	2	1	1	2	2	1	11	3	2
302428	201903189540	18777107204	15	20190318	05:14:39	3649	1	18	1001	1001	999999999999999	999999999999999	383	1	1	9	10	1	1	0	999	2	80	2	22	16	1	52	50	1	72	1	999	1	32	40	99	99	99	99	2	2	1	2	2	1	6	3	2
302493	201903190008	13147601166	23	20190319	00:42:28	3485	1	18	1001	1001	999999999999999	999999999999999	117	1	1	9	10	1	1	0	100	4	100	2	35	16	4	40	10	1	999	99	999	9	99	99	99	99	99	99	9	9	9	9	9	9	999	9	3
302553	201903190206	18504147543	26	20190319	15:05:32	2215	1	18	1001	1001	999999999999999	999999999999999	387	1	1	9	10	1	1	5	99	5	95	2	26	9	1	21	50	1	999	99	999	9	99	99	99	99	99	99	9	9	9	9	9	9	999	9	4
302517	201903190290	17753149492	30	20190319	09:18:44	2829	1	18	1001	1001	999999999999999	999999999999999	332	1	1	9	10	1	1	5	100	2	55	1	23	15	1	39	50	1	76	0	999	1	32	40	99	99	99	99	1	1	2	2	2	1	8	3	2
302505	201903190377	13277593323	21	20190319	07:04:43	3519	1	18	1001	1001	999999999999999	999999999999999	117	1	1	9	10	1	1	30	90	2	90	1	18	8	1	88	15	1	78	0	999	3	32	40	99	99	99	99	2	1	2	1	2	1	8	2	2
302500	201903190818	18334142774	16	20190319	04:22:56	3584	2	11	1001	1001	999999999999999	999999999999999	386	1	1	9	10	1	1	10	95	2	999	2	24	15	2	88	50	1	86	0	999	1	32	40	99	99	99	99	2	2	2	2	2	1	5	2	2
302556	201903190819	17607809528	15	20190319	14:48:15	4859	3	18	1001	1001	999999999999999	999999999999999	411	1	6	5	11	5	2	1	100	5	100	2	24	15	1	52	50	1	62	1	999	5	30	40	99	99	99	99	2	1	2	2	2	2	11	2	2
302504	201903191025	15623318951	21	20190319	07:05:35	1988	1	13	1001	1001	999999999999999	999999999999999	396	1	5	2	26	1	1	100	50	1	0	1	18	13	1	70	1	1	999	99	999	9	99	99	99	99	99	99	9	9	9	9	9	9	999	9	3
302497	201903191211	18722584820	35	20190319	02:50:49	4025	1	18	1001	1001	999999999999999	999999999999999	117	1	5	9	24	1	1	999	90	2	999	1	25	20	1	38	70	1	999	99	999	9	99	99	99	99	99	99	9	9	9	9	9	9	999	9	3
302492	201903191232	13603262424	18	20190319	00:44:40	3542	1	18	1001	1001	999999999999999	999999999999999	396	1	6	5	11	1	1	999	95	2	80	1	18	12	1	70	50	1	78	0	999	1	32	40	99	99	99	99	1	2	1	2	2	2	5	2	2
302545	201903191413	17305698161	19	20190319	14:23:39	2331	1	18	1001	1001	999999999999999	999999999999999	412	1	1	9	10	1	1	0	75	2	50	2	21	14	1	70	3	1	52	1	999	1	30	40	99	99	99	99	1	1	2	2	2	1	9	2	2
302582	201903191919	18652639667	24	20190319	23:23:47	4111	1	18	1001	1001	999999999999999	999999999999999	360	1	6	9	11	1	1	0	100	2	90	2	29	15	2	35	50	1	73	2	999	5	32	40	99	99	99	99	2	2	2	2	2	2	6	3	2
302555	201903191922	17755802506	11	20190319	14:25:01	3708	2	18	1001	1001	999999999999999	999999999999999	332	1	6	9	24	1	1	30	70	2	40	2	26	16	1	39	50	1	72	0	999	1	32	40	99	99	99	99	1	1	2	2	2	1	8	3	2
302520	201903192429	85290621093	41	20190319	10:32:05	1243	1	18	1001	1001	999999999999999	999999999999999	387	1	6	9	11	5	2	999	999	2	999	1	20	16	1	52	60	1	999	99	999	9	99	99	99	99	99	99	9	9	9	9	9	9	999	9	4
302558	201903193675	15507976773	25	20190319	15:29:06	2697	1	18	1001	1001	999999999999999	999999999999999	124	1	1	1	10	1	1	30	80	2	0	2	21	15	1	70	10	1	67	0	999	1	30	40	99	99	99	99	2	1	2	2	2	1	7	3	2
302511	201903193878	13299983517	35	20190319	08:32:07	3009	1	18	1001	1001	999999999999999	999999999999999	387	1	1	9	10	1	1	50	90	1	0	1	54	12	2	60	50	1	85	0	999	1	32	40	99	99	99	99	2	2	2	2	2	2	3	3	2
302560	201903193887	13034332121	35	20190319	16:23:05	2827	1	18	1001	1001	999999999999999	999999999999999	316	1	1	9	10	1	1	0	80	4	100	2	21	12	1	52	50	1	86	1	999	1	32	40	99	99	99	99	1	2	1	2	2	1	11	3	2
302537	201903194171	13636432904	33	20190319	12:08:42	3872	1	18	1001	1001	999999999999999	999999999999999	124	1	6	6	11	1	1	50	70	2	50	2	18	8	1	43	1	1	77	7	999	1	32	40	99	99	99	99	2	2	2	2	2	2	5	2	2
302563	201903194193	18611846182	14	20190319	17:08:23	4072	1	18	1001	1001	999999999999999	999999999999999	385	1	6	9	11	1	1	80	45	2	0	2	36	15	4	44	2	1	96	0	999	1	32	40	99	99	99	99	2	2	2	1	2	1	4	2	2
302508	201903194278	13286581283	18	20190319	08:27:29	2813	2	18	1001	1001	999999999999999	999999999999999	412	1	6	9	24	1	1	5	50	1	0	2	26	8	1	43	50	1	62	1	999	1	32	40	99	99	99	99	1	2	2	1	2	2	6	2	2
302531	201903195391	18354492292	30	20190319	12:07:25	3359	1	18	1001	1001	999999999999999	999999999999999	412	1	1	9	10	1	1	50	90	2	50	2	25	15	1	44	50	1	62	0	999	1	30	40	99	99	99	99	2	1	2	2	2	2	6	3	2
302515	201903195443	13771110695	24	20190319	09:37:09	3467	3	18	1001	1001	999999999999999	999999999999999	412	1	6	2	11	1	1	75	20	1	0	2	30	9	4	52	5	1	31	0	999	1	30	40	99	99	99	99	2	2	2	2	2	1	1	2	2
302548	201903196072	18262554525	24	20190319	14:00:02	2972	1	18	1001	1001	999999999999999	999999999999999	124	1	1	1	10	1	1	80	90	2	50	2	28	15	2	52	50	1	68	0	999	1	30	40	99	99	99	99	1	2	2	2	2	2	4	3	2
302542	201903196167	13125160483	21	20190319	12:34:20	3558	1	18	1001	1001	999999999999999	999999999999999	411	1	6	9	11	1	1	999	999	1	0	1	21	14	1	70	50	1	76	0	999	1	32	40	99	99	99	99	1	1	2	2	2	1	5	3	2
302569	201903196198	13654496725	23	20190319	19:14:44	673	1	18	1001	1001	999999999999999	999999999999999	385	1	6	9	11	1	2	999	999	5	999	1	18	11	1	70	50	1	999	99	999	9	99	99	99	99	99	99	9	9	9	9	9	9	999	9	4
302540	201903196427	18840971893	14	20190319	12:23:31	3667	1	18	1001	1001	999999999999999	999999999999999	403	1	1	1	10	1	1	30	80	1	0	1	30	16	1	44	1	1	52	0	999	1	32	40	99	99	99	99	2	2	2	2	2	2	3	2	2
302564	201903196891	13718002795	10	20190319	17:30:56	1058	1	18	1001	1001	999999999999999	999999999999999	360	1	9	9	99	9	9	999	999	9	999	1	32	19	1	38	6	1	999	99	999	9	99	99	99	99	99	99	9	9	9	9	9	9	999	9	4
302494	201903197138	15649913778	19	20190319	01:46:53	1900	1	18	1001	1001	999999999999999	999999999999999	396	1	1	9	10	1	1	10	70	1	0	2	19	15	1	70	50	1	999	99	999	9	99	99	99	99	99	99	9	9	9	9	9	9	999	9	3
302525	201903197470	18311316266	10	20190319	10:43:49	2658	1	18	1001	1001	999999999999999	999999999999999	332	1	1	9	10	1	1	20	40	2	0	1	22	15	1	70	50	1	999	99	999	9	99	99	99	99	99	99	9	9	9	9	9	9	999	9	3
302523	201903197490	15824208056	39	20190319	10:20:16	3631	1	18	1001	1001	999999999999999	999999999999999	411	1	1	9	10	1	1	20	90	3	45	2	33	16	4	38	50	1	82	0	999	1	32	40	99	99	99	99	2	1	2	2	2	2	6	3	2
302557	201903197899	17872318568	22	20190319	14:54:57	2705	1	18	1001	1001	999999999999999	999999999999999	403	1	5	9	26	1	1	65	85	2	95	1	21	15	1	70	3	1	66	1	999	1	32	40	99	99	99	99	2	2	1	1	2	2	6	2	2
302574	201903197939	13400817701	12	20190319	21:09:11	3523	1	18	1001	1001	999999999999999	999999999999999	316	1	6	9	11	1	1	35	80	2	60	2	23	16	1	38	50	1	72	2	999	1	32	40	99	99	99	99	1	1	2	2	2	1	9	3	2
302568	201903198047	17600092495	10	20190319	18:59:06	3423	1	18	1001	1001	999999999999999	999999999999999	402	1	6	9	24	1	1	80	80	1	0	1	23	16	1	39	5	1	19	0	999	1	30	40	99	99	99	99	2	2	2	1	2	1	3	2	2
302536	201903198120	18256473969	11	20190319	13:14:11	3576	1	18	1001	1001	999999999999999	999999999999999	387	1	5	6	25	1	1	50	50	1	0	2	20	12	1	70	50	1	65	0	999	1	32	40	99	99	99	99	2	1	2	2	2	2	5	3	2
302509	201903198195	18890617951	22	20190319	08:29:31	3639	1	88	1001	1001	999999999999999	999999999999999	391	1	6	9	11	1	1	70	30	1	0	1	25	15	1	39	50	1	12	0	999	1	30	40	99	99	99	99	2	1	2	2	2	2	3	3	2
302513	201903198204	18633546632	18	20190319	08:23:23	3569	1	18	1001	1001	999999999999999	999999999999999	403	1	6	5	11	1	1	0	100	2	90	2	32	16	1	39	50	1	58	0	999	4	32	40	99	99	99	99	1	1	1	2	2	2	9	2	2
302551	201903198304	15210027463	10	20190319	15:10:27	2753	1	18	1001	1001	999999999999999	999999999999999	412	1	6	3	11	1	1	60	40	1	0	2	21	14	1	70	19	1	79	0	999	1	30	40	99	99	99	99	1	2	2	2	2	1	4	2	2
302570	201903198661	18583285818	34	20190319	19:45:06	3690	1	18	1001	1001	999999999999999	999999999999999	385	1	1	9	10	1	1	20	70	2	70	2	23	12	1	52	50	1	88	0	999	5	32	40	99	99	99	99	1	2	2	1	2	2	7	2	2
302528	201903198738	14795085230	32	20190319	11:50:35	3579	1	18	1001	1001	999999999999999	999999999999999	391	1	6	9	12	1	1	10	80	2	50	1	22	16	1	70	4	1	66	3	999	1	32	40	99	99	99	99	1	2	2	2	2	2	6	3	2
302518	201903198823	13106533456	18	20190319	10:05:03	1112	1	18	1001	1001	999999999999999	999999999999999	387	1	1	9	10	1	1	999	999	3	90	2	26	9	1	35	50	1	999	99	999	9	99	99	99	99	99	99	9	9	9	9	9	9	999	9	4
302576	201903198936	18801299176	10	20190319	21:11:20	3665	1	18	1001	1001	999999999999999	999999999999999	402	1	6	9	11	1	1	20	100	2	75	2	21	14	1	70	2	1	100	0	999	5	32	40	99	99	99	99	2	1	2	2	2	1	8	2	2
302514	201903199424	17812176992	10	20190319	08:23:35	3623	6	18	1001	1001	18813177688	999999999999999	124	1	6	6	12	1	1	10	60	2	90	1	28	19	1	40	9	1	63	0	999	1	30	40	99	99	99	99	1	1	2	2	2	1	8	3	2
302499	201903199448	18659996825	12	20190319	04:18:55	4031	1	18	1001	1001	999999999999999	999999999999999	410	1	6	9	11	1	1	70	50	2	999	2	24	99	1	35	99	1	999	99	999	9	99	99	99	99	99	99	9	9	9	9	9	9	999	9	3
302543	201903199639	13971182967	21	20190319	14:11:25	2577	1	18	1001	1001	999999999999999	999999999999999	391	1	6	9	16	1	1	0	98	1	0	1	27	15	1	52	6	1	999	99	999	9	99	99	99	99	99	99	9	9	9	9	9	9	999	9	3
302623	201903200102	15678686271	15	20190320	14:07:34	3199	1	18	1001	1001	999999999999999	999999999999999	124	1	6	5	16	1	1	30	100	2	65	1	24	16	1	35	50	1	65	0	999	1	32	40	99	99	99	99	2	2	1	2	2	1	6	3	2
302605	201903200474	15970488852	25	20190320	10:07:23	4431	2	18	1001	1001	999999999999999	999999999999999	124	1	1	1	10	1	1	0	100	5	100	1	24	16	1	52	50	1	53	2	999	1	31	40	99	99	99	99	1	2	2	2	2	2	9	3	2
302607	201903201025	15737285075	19	20190320	10:52:23	3446	1	18	1001	1001	999999999999999	999999999999999	411	1	6	5	14	1	1	10	85	2	88	2	25	14	1	70	50	1	999	99	999	9	99	99	99	99	99	99	9	9	9	9	9	9	999	9	3
302637	201903201838	18551867822	11	20190320	19:44:37	3632	1	18	1001	1001	999999999999999	999999999999999	387	1	6	9	11	1	1	10	80	2	80	1	30	15	1	52	6	1	60	1	999	1	31	40	99	99	99	99	1	2	1	2	2	2	7	3	2
302599	201903202013	13161818382	10	20190320	09:43:36	3532	1	18	1001	1001	999999999999999	999999999999999	412	1	5	9	10	1	1	0	100	2	80	1	24	16	1	38	50	1	86	0	999	1	32	40	99	99	99	99	1	1	2	1	2	1	9	3	2
302597	201903202819	13820570958	35	20190320	08:36:58	3555	1	18	1001	1001	999999999999999	999999999999999	411	1	6	9	11	1	1	20	50	2	70	1	18	11	1	70	50	1	66	1	999	1	32	40	99	99	99	99	1	2	2	2	2	1	7	3	2
302638	201903202823	17695728376	10	20190320	19:03:12	3224	1	18	1001	1001	999999999999999	999999999999999	403	1	5	9	26	4	1	85	70	1	0	1	24	17	1	70	1	1	48	0	999	1	30	40	99	99	99	99	1	2	2	2	2	1	3	2	2
302632	201903203038	18565744251	14	20190320	17:13:33	2439	1	18	1001	1001	999999999999999	999999999999999	403	1	6	9	24	5	2	75	55	2	75	2	20	15	1	70	50	1	96	0	999	1	32	40	99	99	99	99	2	2	2	2	1	2	4	2	2
302628	201903203394	18756915117	11	20190320	14:36:24	2602	1	18	1001	1001	999999999999999	999999999999999	411	1	5	9	10	1	1	50	65	2	35	1	22	15	1	70	4	1	999	99	999	9	99	99	99	99	99	99	9	9	9	9	9	9	999	9	3
302581	201903203497	18547565297	27	20190320	00:10:37	3606	1	18	1001	1001	999999999999999	999999999999999	316	1	1	9	10	1	1	0	50	3	85	1	22	14	1	52	50	1	77	3	999	1	32	40	99	99	99	99	1	2	2	2	2	1	7	2	2
302591	201903204108	15266763702	30	20190320	07:06:20	3278	1	18	1001	1001	999999999999999	999999999999999	408	1	1	9	10	1	1	30	80	2	60	1	20	12	1	52	50	1	83	0	999	1	32	40	99	99	99	99	1	1	2	1	1	1	10	2	2
302640	201903204903	86353476	10	20190320	21:40:51	5042	1	18	1001	1001	999999999999999	999999999999999	390	1	2	9	10	1	1	100	100	1	0	1	29	15	1	40	50	1	52	0	999	1	30	40	99	99	99	99	1	1	2	2	2	1	6	3	2
302593	201903205392	16639159091	19	20190320	08:20:08	3504	1	18	1001	1001	999999999999999	999999999999999	412	1	6	9	11	1	2	999	80	2	80	2	33	12	1	20	50	1	999	0	999	9	30	40	99	99	99	99	9	9	9	9	9	9	1	9	5
302600	201903206358	19967230306	10	20190320	08:41:55	3431	5	18	1001	1001	17773222523	999999999999999	124	1	6	7	12	1	1	20	100	2	20	1	19	11	1	70	11	1	70	0	999	1	32	40	99	99	99	99	1	2	2	1	2	2	6	2	2
302626	201903206467	13290901973	19	20190320	15:00:02	3429	1	18	1001	1001	999999999999999	999999999999999	409	1	5	9	10	1	1	85	35	1	0	2	20	13	1	70	2	1	38	0	999	1	30	40	99	99	99	99	2	1	2	2	2	1	3	2	2
302602	201903206975	13716967843	10	20190320	08:48:21	2450	1	18	1001	1001	999999999999999	999999999999999	389	1	1	9	10	1	1	999	91	1	0	1	43	12	2	38	50	1	999	99	999	9	99	99	99	99	99	99	9	9	9	9	9	9	999	9	3
302630	201903207016	13074147295	26	20190320	16:55:27	3345	1	18	1001	1001	999999999999999	999999999999999	387	1	1	9	10	1	1	3	100	2	70	1	35	16	2	38	50	1	100	0	999	1	32	40	99	99	99	99	1	1	2	2	2	2	7	2	2
302583	201903207100	15922114585	35	20190320	00:11:51	3658	1	18	1001	1001	999999999999999	999999999999999	402	1	6	9	23	1	1	80	90	1	0	2	33	9	4	35	3	1	999	99	999	9	30	40	99	99	99	99	9	9	9	9	9	9	0	9	5
302646	201903207746	13680367047	14	20190320	23:24:24	2860	1	18	1001	1001	999999999999999	999999999999999	403	1	1	1	10	1	1	100	999	2	85	1	19	12	1	70	50	1	20	0	999	1	30	40	99	99	99	99	2	1	2	2	2	1	4	2	2
302596	201903207831	13476230361	21	20190320	08:36:40	2731	1	18	1001	1001	999999999999999	999999999999999	409	1	1	9	10	1	1	80	35	2	35	2	19	13	1	70	1	1	68	0	999	1	30	40	99	99	99	99	1	2	2	2	2	2	3	2	2
302624	201903209007	15837574451	39	20190320	15:28:06	3289	1	18	1001	1001	999999999999999	999999999999999	388	1	1	9	10	1	1	0	100	2	50	2	23	6	4	35	10	1	88	2	999	1	32	40	99	99	99	99	1	2	1	2	2	2	6	3	2
302618	201903209089	15650079379	30	20190320	13:37:23	2718	1	18	1001	1001	999999999999999	999999999999999	409	1	1	9	10	1	1	0	90	2	87	1	19	12	1	70	50	1	72	0	999	1	32	40	99	99	99	99	1	1	2	1	1	2	9	2	2
302601	201903209224	17550529500	21	20190320	10:04:18	3439	1	18	1001	1001	999999999999999	999999999999999	388	1	6	9	10	1	1	999	70	1	0	1	26	19	1	39	50	1	999	0	999	9	30	40	99	99	99	99	9	9	9	9	9	9	0	9	5
302606	201903209325	15244846460	34	20190320	11:19:30	2627	1	18	1001	1001	999999999999999	999999999999999	409	1	5	9	10	1	1	100	60	1	0	2	26	12	1	22	50	1	42	0	999	1	30	40	99	99	99	99	2	2	2	1	2	2	2	2	2
302590	201903209367	13067715790	39	20190320	05:28:01	3195	1	18	1001	1001	999999999999999	999999999999999	360	1	3	9	24	1	1	50	90	2	99	2	19	9	1	52	60	1	999	99	999	9	99	99	99	99	99	99	9	9	9	9	9	9	999	9	3
302634	201903209475	18325021347	40	20190320	19:43:14	3751	1	18	1001	1001	999999999999999	999999999999999	390	1	1	1	10	1	1	25	85	1	0	2	19	13	1	70	50	1	33	0	999	1	30	40	99	99	99	99	1	2	2	2	2	2	3	3	2
302610	201903209499	18845070791	20	20190320	12:21:39	3124	1	14	1001	1001	999999999999999	999999999999999	412	1	5	9	10	1	1	90	95	2	80	2	20	14	1	70	50	1	83	1	999	5	32	40	99	99	99	99	1	1	2	2	1	1	9	3	2
302615	201903209582	18230022158	32	20190320	12:48:41	3306	1	11	1001	1001	999999999999999	999999999999999	124	1	1	1	10	1	1	60	75	2	30	1	19	14	1	70	2	1	62	3	999	1	31	40	99	99	99	99	1	2	2	2	2	2	5	3	2
302644	201903209777	17625594308	24	20190320	22:45:59	3621	1	11	1001	1001	999999999999999	999999999999999	315	1	1	9	10	1	1	50	80	2	50	1	22	11	1	52	1	1	67	0	999	1	32	40	99	99	99	99	2	2	2	2	2	2	4	3	2
302753	201903210066	17833667895	14	20190321	22:51:06	3580	1	18	1001	1001	999999999999999	999999999999999	412	1	1	9	10	1	1	50	35	1	0	1	25	16	1	38	3	1	69	0	999	1	32	40	99	99	99	99	1	2	1	2	2	2	4	2	2
302701	201903210084	13043931886	19	20190321	12:22:38	1394	1	18	1001	1001	999999999999999	999999999999999	406	1	6	6	11	1	1	0	60	1	40	2	29	6	1	52	20	1	999	99	999	9	99	99	99	99	99	99	9	9	9	9	9	9	999	9	4
302684	201903210753	13514311972	23	20190321	10:23:32	1626	1	88	1001	1001	999999999999999	999999999999999	383	1	6	9	11	1	2	70	90	1	0	2	23	16	1	70	50	1	38	0	999	1	31	40	99	99	99	99	2	2	2	2	2	1	2	3	2
302706	201903210937	18331332730	10	20190321	12:49:11	3686	1	13	1001	1001	999999999999999	999999999999999	383	1	1	9	10	1	1	50	50	1	0	2	27	12	1	38	60	1	47	0	999	1	31	40	99	99	99	99	2	1	2	2	2	2	4	3	2
302669	201903211009	15593449652	30	20190321	08:53:01	4571	1	18	1001	1001	999999999999999	999999999999999	406	1	6	7	11	1	1	40	100	4	95	2	19	7	1	52	60	1	85	4	999	1	32	40	99	99	99	99	2	1	2	2	2	1	11	2	2
302697	201903211669	15303262937	18	20190321	10:38:18	3550	1	10	1001	1001	999999999999999	999999999999999	409	1	6	9	11	5	2	0	100	2	100	2	28	4	1	88	60	1	57	0	999	1	30	40	99	99	99	99	1	1	1	2	2	2	8	2	2
302721	201903211838	18050576325	12	20190321	14:35:45	1932	2	18	1001	1001	999999999999999	999999999999999	388	1	1	9	10	1	1	0	100	1	0	2	31	9	1	52	50	1	83	0	999	9	32	40	99	99	99	99	9	9	9	9	9	9	1	9	5
302744	201903211868	19979601118	15	20190321	19:40:31	3635	1	18	1001	1001	999999999999999	999999999999999	391	1	1	9	10	1	1	50	90	2	70	2	28	15	1	38	3	1	54	0	999	4	31	40	99	99	99	99	2	1	2	2	2	2	7	3	2
302734	201903211967	15811165472	10	20190321	17:30:13	4712	1	18	1001	1001	999999999999999	999999999999999	412	1	6	9	11	1	2	0	100	2	80	1	26	16	1	52	6	1	81	1	999	5	32	40	99	99	99	99	1	1	2	1	2	1	11	3	2
302724	201903212071	17756046091	11	20190321	14:37:20	1903	1	18	1001	1001	999999999999999	999999999999999	383	1	1	9	10	1	1	999	100	5	100	2	29	15	2	21	6	1	999	1	999	9	30	40	99	99	99	99	9	9	9	9	9	9	5	9	5
302694	201903212542	13519977770	37	20190321	11:13:40	2584	4	18	1001	1001	999999999999999	999999999999999	388	1	6	9	11	1	1	999	100	2	40	1	36	14	2	52	50	1	35	0	999	1	30	40	99	99	99	99	1	2	1	2	2	2	4	3	2
302689	201903212795	15190080011	24	20190321	10:46:30	806	1	99	1001	1001	999999999999999	999999999999999	408	1	1	9	10	1	1	50	50	1	0	1	24	12	1	21	99	1	999	99	999	9	99	99	99	99	99	99	9	9	9	9	9	9	999	9	3
302678	201903213303	18795805895	24	20190321	09:18:36	1884	1	18	1001	1001	999999999999999	999999999999999	409	1	1	9	10	1	1	30	100	2	60	2	20	15	1	38	50	1	999	99	999	9	99	99	99	99	99	99	9	9	9	9	9	9	999	9	3
302722	201903213311	17703228067	18	20190321	13:42:11	3658	1	18	1001	1001	999999999999999	999999999999999	409	1	5	9	24	1	1	0	30	2	50	1	19	13	1	70	50	1	76	0	999	1	32	40	99	99	99	99	1	1	2	1	1	2	8	2	2
302709	201903213577	13521132610	10	20190321	12:55:08	3506	2	14	1001	1001	999999999999999	999999999999999	408	1	5	9	26	1	1	999	85	1	0	1	31	16	2	38	50	1	49	0	999	1	30	40	99	99	99	99	1	1	2	2	2	1	5	3	2
302652	201903214059	18063015501	11	20190321	01:56:25	2506	4	18	1001	1001	999999999999999	999999999999999	403	1	5	9	11	1	1	0	90	1	0	2	20	13	1	70	50	1	999	99	999	9	99	99	99	99	99	99	9	9	9	9	9	9	999	9	3
302725	201903214291	15981381488	23	20190321	13:50:16	3248	1	18	1001	1001	999999999999999	999999999999999	124	1	1	1	10	1	1	10	90	2	70	1	38	9	2	52	50	1	100	0	999	1	32	40	99	99	99	99	1	1	1	2	2	2	8	3	2
302687	201903214528	19987155564	38	20190321	10:39:12	2598	1	11	1001	1001	999999999999999	999999999999999	335	1	1	9	10	1	1	50	60	1	0	2	20	12	1	70	50	1	31	0	999	1	30	40	99	99	99	99	1	2	2	2	2	1	4	3	2
302719	201903214597	13001315581	35	20190321	14:33:52	2622	3	18	1001	1001	999999999999999	999999999999999	335	1	6	9	12	5	2	0	100	2	50	2	51	16	2	50	50	1	87	0	999	1	32	40	99	99	99	99	1	1	2	2	2	2	7	3	2
302666	201903214730	18950866114	12	20190321	08:30:53	3284	1	13	1001	1001	999999999999999	999999999999999	401	1	2	9	10	1	1	0	100	1	0	1	35	12	2	50	5	1	999	0	999	9	30	40	99	99	99	99	9	9	9	9	9	9	1	9	5
302680	201903215283	15947571871	27	20190321	10:09:47	821	1	18	1001	1001	999999999999999	999999999999999	408	1	1	9	10	1	1	30	50	1	0	1	20	13	1	70	50	1	999	99	999	9	99	99	99	99	99	99	9	9	9	9	9	9	999	9	4
302751	201903215494	15368135051	38	20190321	21:30:06	3643	1	18	1001	1001	999999999999999	999999999999999	411	1	5	9	26	1	1	50	85	2	50	1	27	16	2	39	50	1	73	0	999	1	32	40	99	99	99	99	2	2	2	2	2	2	4	3	2
302738	201903215608	15246344081	20	20190321	17:54:23	3720	1	18	1001	1001	999999999999999	999999999999999	411	1	6	5	11	5	2	0	55	2	75	1	18	11	1	70	50	1	78	0	999	1	32	40	99	99	99	99	1	1	2	1	2	2	8	3	2
302693	201903215785	15919589089	14	20190321	11:06:18	3004	1	18	1001	1001	999999999999999	999999999999999	408	1	5	9	26	1	1	10	80	2	50	2	40	12	2	44	50	1	88	0	999	1	32	40	99	99	99	99	1	1	1	2	1	1	10	2	2
302692	201903215982	13213999899	19	20190321	10:44:57	808	1	18	1001	1001	999999999999999	999999999999999	388	1	1	9	10	1	1	999	999	2	999	2	37	16	2	38	8	1	999	99	999	9	99	99	99	99	99	99	9	9	9	9	9	9	999	9	4
302675	201903216130	18369995576	30	20190321	08:48:14	3288	1	18	1001	1001	999999999999999	999999999999999	383	1	6	9	11	5	2	45	65	1	0	1	27	19	1	31	70	1	62	0	999	1	32	40	99	99	99	99	2	2	2	1	2	1	5	3	2
302662	201903216208	17301762740	21	20190321	07:28:05	3183	3	18	1001	1001	999999999999999	999999999999999	387	1	6	9	12	1	1	0	50	2	100	1	28	16	1	38	50	1	80	3	999	1	32	40	99	99	99	99	1	2	2	2	2	1	7	2	2
302683	201903216259	19931709089	18	20190321	10:05:00	3691	1	18	1001	1001	999999999999999	999999999999999	401	1	6	5	11	1	1	51	80	1	0	1	18	12	1	70	50	1	49	1	999	1	30	40	99	99	99	99	1	1	2	2	2	2	6	2	2
302690	201903216376	18600813767	10	20190321	09:54:11	4003	2	11	1001	1001	999999999999999	999999999999999	124	1	3	3	17	2	1	15	95	5	80	1	32	19	2	52	50	1	86	0	999	1	30	40	99	99	99	99	1	1	1	2	1	2	12	3	2
302696	201903216434	17154912208	11	20190321	11:29:58	2064	1	18	1001	1001	999999999999999	999999999999999	335	1	1	9	10	1	1	20	80	2	90	1	25	15	1	35	50	1	999	0	999	9	30	40	99	99	99	99	9	9	9	9	9	9	1	9	5
302672	201903217028	19933573671	18	20190321	08:48:43	2236	2	18	1001	1001	999999999999999	999999999999999	408	1	6	6	14	1	1	0	100	2	50	1	25	12	1	70	19	1	100	0	999	1	32	40	99	99	99	99	1	2	2	2	2	2	5	2	2
302745	201903217289	18701100852	15	20190321	20:16:03	3678	1	18	1001	1001	999999999999999	999999999999999	332	1	1	9	10	1	1	0	85	2	85	2	29	16	1	44	50	1	94	0	999	1	32	40	99	99	99	99	1	1	2	2	2	1	8	3	2
302717	201903217339	13878200022	15	20190321	14:03:16	958	1	18	1001	1001	999999999999999	999999999999999	408	1	1	9	10	1	1	0	100	2	100	1	30	9	1	21	50	1	999	99	999	9	99	99	99	99	99	99	9	9	9	9	9	9	999	9	4
302735	201903217757	15280100756	12	20190321	16:44:55	3305	1	18	1001	1001	999999999999999	999999999999999	391	1	1	9	10	1	1	75	60	1	0	1	22	16	1	70	50	1	59	0	999	1	32	40	99	99	99	99	1	1	2	1	2	1	7	3	2
302737	201903217950	18183295150	34	20190321	18:02:28	2497	1	18	1001	1001	999999999999999	999999999999999	391	1	5	9	26	1	1	10	80	2	30	2	34	11	1	44	50	1	999	99	999	9	99	99	99	99	99	99	9	9	9	9	9	9	999	9	3
302707	201903218228	16605894314	16	20190321	13:23:40	1605	1	11	1001	1001	999999999999999	999999999999999	388	1	1	9	10	1	1	65	70	2	50	2	22	12	1	44	50	1	999	99	999	9	99	99	99	99	99	99	9	9	9	9	9	9	999	9	3
302670	201903218338	15722946889	24	20190321	08:44:11	3773	1	18	1001	1001	999999999999999	999999999999999	335	1	7	6	12	1	1	0	0	3	100	2	21	12	1	52	3	1	98	4	999	3	32	40	99	99	99	99	1	1	2	1	2	1	10	3	2
302723	201903219134	13280816273	30	20190321	14:26:55	2943	1	18	1001	1001	999999999999999	999999999999999	408	1	5	9	26	1	1	999	100	2	50	1	32	16	2	52	50	1	81	0	999	1	30	40	99	99	99	99	1	1	1	2	2	1	8	2	2
302733	201903219248	18382303400	34	20190321	16:26:04	2658	2	18	1001	1001	999999999999999	999999999999999	412	1	6	5	11	1	1	999	100	1	0	1	24	16	1	52	50	1	999	2	999	9	30	40	99	99	99	99	9	9	9	9	9	9	1	9	5
302655	201903219513	18688252621	14	20190321	03:45:09	3555	1	18	1001	1001	999999999999999	999999999999999	315	1	1	9	10	1	1	10	90	3	80	1	26	16	1	38	3	1	76	2	999	1	32	40	99	99	99	99	1	2	2	2	2	1	7	3	2
302661	201903219644	18621785091	33	20190321	07:11:25	640	1	18	1001	1001	999999999999999	999999999999999	387	1	9	9	12	1	1	999	999	2	999	1	33	18	1	38	8	1	999	99	999	9	99	99	99	99	99	99	9	9	9	9	9	9	999	9	4
302674	201903219897	18801102423	10	20190321	08:04:31	2878	1	18	1001	1001	999999999999999	999999999999999	124	1	1	1	10	1	1	30	80	2	30	2	19	13	1	70	50	1	80	0	999	2	32	40	99	99	99	99	1	1	2	2	2	1	8	3	2
302761	201903220125	13920492702	18	20190322	02:07:23	3772	1	16	1001	1001	999999999999999	999999999999999	332	1	6	5	11	1	1	50	95	2	10	2	28	15	1	52	50	1	64	0	999	1	31	40	99	99	99	99	1	1	2	2	2	2	6	2	2
302805	201903220258	13520477234	10	20190322	14:10:25	3709	1	18	1001	1001	999999999999999	999999999999999	401	1	1	9	10	1	1	40	75	2	50	2	31	16	1	38	8	1	74	0	999	5	30	40	99	99	99	99	1	1	2	2	2	2	8	2	2
302816	201903220435	15141816368	26	20190322	16:19:43	1874	2	18	1001	1001	999999999999999	999999999999999	388	1	6	9	14	1	4	50	50	1	0	1	22	15	1	70	50	1	63	0	999	1	32	40	99	99	99	99	2	2	2	2	2	1	4	3	2
302802	201903222620	13544056534	14	20190322	13:16:01	2933	1	18	1001	1001	999999999999999	999999999999999	117	1	1	9	10	1	1	999	999	1	0	1	32	15	2	21	50	1	999	99	999	9	99	99	99	99	99	99	9	9	9	9	9	9	999	9	3
302812	201903222788	18909195709	32	20190322	15:00:23	1873	1	18	1001	1001	999999999999999	999999999999999	408	1	1	9	10	1	1	30	20	6	70	1	19	12	1	70	50	1	37	4	999	1	30	40	99	99	99	99	2	1	2	2	2	2	5	3	2
302768	201903223194	13260068380	10	20190322	05:25:31	2304	1	18	1001	1001	999999999999999	999999999999999	391	1	6	5	12	5	3	10	100	2	70	2	24	15	1	44	6	1	98	0	999	5	32	40	99	99	99	99	1	1	1	1	2	1	11	3	2
302828	201903223476	13525825250	19	20190322	23:22:22	3526	1	18	1001	1001	999999999999999	999999999999999	409	1	6	9	11	1	1	10	80	2	80	1	20	10	1	38	2	1	76	6	999	1	30	40	99	99	99	99	1	1	2	2	1	1	10	2	2
302762	201903223575	18369940758	30	20190322	03:34:09	3779	1	18	1001	1001	999999999999999	999999999999999	412	1	5	9	10	1	1	100	999	2	65	2	22	9	1	38	50	1	28	0	999	1	30	40	99	99	99	99	2	2	2	2	2	2	1	3	2
302773	201903223658	17674321307	10	20190322	08:29:27	633	1	18	1001	1001	999999999999999	999999999999999	408	1	9	9	99	9	9	999	999	9	0	1	21	16	1	39	99	1	999	99	999	9	99	99	99	99	99	99	9	9	9	9	9	9	999	9	4
302771	201903223983	15243988876	22	20190322	08:15:25	977	1	99	1001	1001	999999999999999	999999999999999	396	1	9	9	99	9	9	999	999	2	999	2	22	16	1	70	99	1	999	99	999	9	99	99	99	99	99	99	9	9	9	9	9	9	999	9	4
302785	201903224066	17810318308	10	20190322	10:06:07	2331	1	18	1001	1001	999999999999999	999999999999999	396	1	1	9	10	1	1	999	100	2	75	2	26	16	1	38	8	1	999	99	999	9	99	99	99	99	99	99	9	9	9	9	9	9	999	9	3
302769	201903224155	13920204904	35	20190322	06:18:16	3536	1	18	1001	1001	999999999999999	999999999999999	412	1	1	9	10	1	1	50	90	2	75	1	30	15	2	44	50	1	79	2	999	1	32	40	99	99	99	99	1	1	1	2	2	2	9	3	2
302760	201903224429	18288982592	38	20190322	01:51:43	3550	1	18	1001	1001	999999999999999	999999999999999	411	1	6	9	25	1	1	25	80	1	0	1	55	16	2	60	15	1	88	0	999	1	32	40	99	99	99	99	2	2	2	2	2	2	4	3	2
302808	201903224725	13401980818	24	20190322	14:52:58	3674	1	18	1001	1001	999999999999999	999999999999999	383	1	1	9	10	1	1	999	99	2	75	2	23	16	1	34	3	1	73	0	999	1	32	40	99	99	99	99	1	2	2	2	2	2	4	3	2
302815	201903225772	18759108841	12	20190322	16:16:39	3353	1	11	1001	1001	999999999999999	999999999999999	406	1	1	1	10	1	1	70	60	1	0	1	21	15	1	70	3	1	43	0	999	1	30	40	99	99	99	99	1	1	2	2	2	1	5	2	2
302807	201903226670	18768122482	39	20190322	12:49:44	3307	1	18	1001	1001	999999999999999	999999999999999	377	1	6	9	11	5	2	0	70	2	60	1	27	19	1	38	50	1	85	0	999	1	32	40	99	99	99	99	1	1	2	2	2	2	7	2	2
302776	201903227032	15371080315	24	20190322	08:45:15	3014	1	18	1001	1001	999999999999999	999999999999999	408	1	6	9	11	1	1	15	70	2	60	2	30	16	1	38	50	1	44	2	999	1	32	40	99	99	99	99	1	1	2	2	2	1	8	2	2
302814	201903227107	13802835719	14	20190322	14:43:21	2861	1	18	1001	1001	999999999999999	999999999999999	377	1	1	9	10	1	1	10	70	2	30	2	40	12	1	52	2	1	54	0	999	1	31	40	99	99	99	99	1	1	2	2	2	2	7	2	2
302791	201903227289	17698302302	21	20190322	10:26:35	4104	1	18	1001	1001	999999999999999	999999999999999	401	1	1	9	10	1	1	35	30	7	92	2	20	9	1	42	1	1	75	5	999	1	32	40	99	99	99	99	2	1	2	1	2	1	11	2	2
302796	201903227690	13051978143	10	20190322	11:53:17	3547	3	18	1001	1001	18800185523	999999999999999	396	1	1	9	10	1	1	0	80	2	70	2	25	15	1	70	6	1	65	2	999	1	32	40	99	99	99	99	1	2	1	1	2	1	9	2	2
302829	201903227855	13087790102	18	20190322	23:44:21	2343	1	18	1001	1001	999999999999999	999999999999999	389	1	1	9	10	1	1	35	75	1	0	1	19	12	1	38	50	1	999	99	999	9	99	99	99	99	99	99	9	9	9	9	9	9	999	9	3
302790	201903228252	18621679353	33	20190322	10:35:43	2570	1	18	1001	1001	999999999999999	999999999999999	383	1	6	5	24	1	1	20	60	2	80	1	19	11	1	52	60	1	86	1	999	1	32	40	99	99	99	99	1	1	2	1	1	1	11	3	2
302777	201903228445	13716385237	10	20190322	08:45:30	3115	2	18	1001	1001	999999999999999	999999999999999	396	1	1	9	10	1	5	10	100	1	0	1	48	15	4	33	50	1	77	0	999	1	32	40	99	99	99	99	1	1	1	2	2	1	8	2	2
302757	201903228486	15136902283	19	20190322	00:14:56	3540	1	18	1001	1001	999999999999999	999999999999999	411	1	1	9	10	1	1	40	90	2	40	1	18	18	1	70	50	1	50	0	999	1	30	40	99	99	99	99	1	1	2	2	2	2	7	3	2
302824	201903228543	17339096813	19	20190322	18:06:40	3207	1	18	1001	1001	999999999999999	999999999999999	409	1	1	9	10	1	1	10	70	2	60	1	28	16	1	43	50	1	999	99	999	9	99	99	99	99	99	99	9	9	9	9	9	9	999	9	3
302827	201903228632	15202117769	33	20190322	23:18:17	4102	1	18	1001	1001	999999999999999	999999999999999	388	1	1	9	10	1	1	999	80	2	50	1	22	9	1	70	50	1	47	0	999	1	32	40	99	99	99	99	2	2	2	2	2	1	3	3	2
302789	201903228946	18646546740	20	20190322	10:27:32	3430	1	18	1001	1001	999999999999999	999999999999999	408	1	6	9	11	1	1	15	70	3	80	2	26	16	1	31	50	1	65	0	999	1	32	40	99	99	99	99	2	2	1	2	2	1	6	3	2
302800	201903229091	13864483570	30	20190322	12:56:28	2362	1	18	1001	1001	999999999999999	999999999999999	383	1	1	9	10	1	1	0	80	1	0	1	24	15	1	38	50	1	40	0	999	1	30	40	99	99	99	99	1	2	2	2	1	1	5	3	2
302780	201903229184	15591873706	32	20190322	08:36:45	3873	1	14	1001	1001	999999999999999	999999999999999	401	1	1	9	10	1	1	70	75	1	0	2	23	16	1	52	50	1	46	0	999	1	31	40	99	99	99	99	1	1	2	2	2	2	4	2	2
302795	201903229455	15802108477	33	20190322	10:02:42	2985	1	18	1001	1001	999999999999999	999999999999999	377	1	1	9	10	1	1	0	80	2	50	1	23	15	1	38	50	1	39	1	999	1	30	40	99	99	99	99	1	1	2	2	2	1	8	2	2
302803	201903229505	13397218001	21	20190322	13:33:54	3641	1	18	1001	1001	999999999999999	999999999999999	408	1	2	9	10	1	1	85	55	2	85	2	33	16	4	52	9	1	72	0	999	1	32	40	99	99	99	99	1	1	2	2	2	1	7	3	2
302801	201903229575	13051021552	10	20190322	12:27:34	1833	1	99	1001	1001	999999999999999	999999999999999	117	1	1	9	10	1	1	999	999	1	0	1	20	13	1	70	99	1	999	99	999	9	99	99	99	99	99	99	9	9	9	9	9	9	999	9	4
302783	201903229779	17602328672	40	20190322	09:43:06	1953	1	18	1001	1001	999999999999999	999999999999999	408	1	1	9	10	1	1	999	45	2	50	2	18	12	1	70	50	1	76	0	999	4	32	40	99	99	99	99	1	1	2	2	2	1	7	3	2
302811	201903229887	13762204761	22	20190322	15:10:07	2343	1	18	1001	1001	999999999999999	999999999999999	396	1	1	9	10	1	1	50	80	1	0	2	52	12	2	43	50	1	999	0	999	9	30	40	99	99	99	99	9	9	9	9	9	9	0	9	5
302882	201903232010	17621190897	11	20190323	16:11:59	3608	1	18	1001	1001	999999999999999	999999999999999	383	1	1	9	10	1	1	50	999	2	75	2	30	16	1	34	50	1	40	0	999	1	30	40	99	99	99	99	2	2	2	2	2	2	2	3	2
302879	201903232046	18632936921	18	20190323	14:47:31	3198	1	18	1001	1001	999999999999999	999999999999999	117	1	1	9	10	1	1	10	70	1	0	1	18	12	1	70	50	1	1	1	999	1	30	40	99	99	99	99	2	1	2	2	2	2	5	2	2
302893	201903232459	15366102559	24	20190323	18:54:25	1948	1	14	1001	1001	999999999999999	999999999999999	408	1	6	9	11	1	1	15	90	2	65	1	22	16	1	70	50	1	76	0	999	1	32	40	99	99	99	99	1	1	1	2	1	2	9	3	2
302887	201903233027	18583810936	34	20190323	17:56:23	2284	1	18	1001	1001	999999999999999	999999999999999	408	1	1	9	10	1	1	50	75	1	0	1	20	13	1	70	2	1	999	99	999	9	99	99	99	99	99	99	9	9	9	9	9	9	999	9	3
302901	201903233257	18806662434	14	20190323	23:51:14	944	1	99	1001	1001	999999999999999	999999999999999	408	1	1	9	10	1	1	999	999	9	75	2	38	16	4	99	99	1	999	99	999	9	99	99	99	99	99	99	9	9	9	9	9	9	999	9	4
302863	201903233714	17505670457	24	20190323	12:26:45	3041	1	18	1001	1001	999999999999999	999999999999999	396	1	1	9	10	1	1	60	85	2	70	2	21	15	1	70	60	1	43	0	999	1	30	40	99	99	99	99	2	2	2	2	2	2	2	2	2
302896	201903234533	15005538107	11	20190323	20:45:56	3822	1	18	1001	1001	999999999999999	999999999999999	335	1	6	5	11	1	1	20	80	1	0	2	43	12	4	42	50	1	62	1	999	4	31	40	99	99	99	99	1	1	2	2	2	2	8	3	2
302885	201903235569	17680162965	22	20190323	17:45:07	2501	1	18	1001	1001	999999999999999	999999999999999	335	1	1	9	10	1	1	80	90	2	80	1	21	15	1	35	50	1	42	0	999	1	30	40	99	99	99	99	1	1	2	2	2	2	5	3	2
302881	201903235660	15801535287	10	20190323	16:11:27	3500	1	18	1001	1001	999999999999999	999999999999999	408	1	1	9	10	1	9	35	100	2	80	2	30	15	1	38	50	1	69	0	999	1	32	40	99	99	99	99	1	1	2	1	1	2	9	3	2
302836	201903235983	19979185391	25	20190323	06:14:15	3671	1	11	1001	1001	999999999999999	999999999999999	406	1	1	1	10	1	1	50	70	2	999	2	25	12	1	35	20	1	67	0	999	1	32	40	99	99	99	99	2	1	2	2	2	1	7	2	2
302871	201903236057	17851346933	24	20190323	13:23:52	1458	1	18	1001	1001	999999999999999	999999999999999	117	1	6	9	11	1	1	999	999	2	999	1	20	13	1	70	50	1	999	99	999	9	99	99	99	99	99	99	9	9	9	9	9	9	999	9	4
302899	201903236157	15501150706	10	20190323	22:56:59	2290	1	18	1001	1001	999999999999999	999999999999999	408	1	1	9	10	1	1	999	999	2	999	1	26	16	1	38	50	1	999	99	999	9	99	99	99	99	99	99	9	9	9	9	9	9	999	9	3
302833	201903236202	15053146300	30	20190323	02:12:02	3693	1	18	1001	1001	999999999999999	999999999999999	389	1	1	9	10	1	1	0	60	1	0	2	21	13	1	70	50	1	80	0	999	3	32	40	99	99	99	99	1	2	2	2	1	1	8	2	2
302856	201903236346	15751468151	24	20190323	10:00:29	2286	1	11	1001	1001	999999999999999	999999999999999	117	1	1	9	10	1	1	0	90	2	90	1	23	15	1	38	50	1	999	99	999	9	99	99	99	99	99	99	9	9	9	9	9	9	999	9	3
302837	201903236560	18043359488	23	20190323	07:01:49	2568	1	18	1001	1001	999999999999999	999999999999999	409	1	5	9	24	1	1	45	60	1	0	2	42	15	2	40	20	1	999	99	999	9	99	99	99	99	99	99	9	9	9	9	9	9	999	9	3
302884	201903236729	15738921879	19	20190323	17:37:11	621	1	18	1001	1001	999999999999999	999999999999999	408	1	6	9	13	5	4	0	100	2	100	1	31	12	2	52	50	1	999	99	999	9	99	99	99	99	99	99	9	9	9	9	9	9	999	9	4
302845	201903236776	18822044304	35	20190323	08:39:33	3477	1	18	1001	1001	999999999999999	999999999999999	396	1	1	9	10	1	1	30	999	2	55	2	21	15	1	70	3	1	78	0	999	1	32	40	99	99	99	99	1	1	2	1	2	1	8	2	2
302857	201903237648	13433036887	14	20190323	10:59:12	3440	1	18	1001	1001	999999999999999	999999999999999	404	1	1	9	10	1	1	45	85	2	50	2	23	9	1	43	2	1	88	0	999	1	32	40	99	99	99	99	1	2	2	2	1	2	6	2	2
302834	201903237756	18998214060	14	20190323	04:08:44	3466	1	11	1001	1001	999999999999999	999999999999999	406	1	8	8	25	1	7	50	85	1	0	1	22	15	1	70	20	1	38	2	999	1	31	40	99	99	99	99	1	1	2	1	2	2	7	2	2
302897	201903237885	13899217860	37	20190323	21:47:49	2789	1	18	1001	1001	999999999999999	999999999999999	383	1	1	9	10	1	1	10	80	2	90	1	20	16	1	52	50	1	81	10	999	1	32	40	99	99	99	99	1	1	2	2	1	1	10	3	2
302835	201903238764	15010070020	10	20190323	04:46:05	4475	1	18	1001	1001	999999999999999	999999999999999	388	1	1	9	10	1	1	30	95	2	5	1	27	16	1	38	3	1	94	2	999	3	32	40	99	99	99	99	1	1	2	1	2	1	11	3	2
302847	201903239320	18519343410	10	20190323	08:24:42	4032	1	18	1001	1001	999999999999999	999999999999999	377	1	1	9	10	1	1	0	90	1	0	1	35	19	4	39	50	1	78	0	999	1	32	40	99	99	99	99	1	1	2	2	2	1	7	2	2
302924	201903240436	15913563736	14	20190324	09:43:36	3603	1	18	1001	1001	999999999999999	999999999999999	315	1	6	9	25	1	1	25	80	2	90	1	22	13	1	70	1	1	60	0	999	1	31	40	99	99	99	99	1	2	2	2	2	1	6	2	2
302905	201903240854	15909549724	28	20190324	00:37:21	3950	1	18	1001	1001	999999999999999	999999999999999	408	1	1	9	10	1	1	0	100	6	100	2	28	16	1	52	60	1	100	1	999	5	32	40	99	99	99	99	1	2	2	2	2	2	10	2	2
302944	201903241120	15170235569	25	20190324	18:14:50	3579	1	18	1001	1001	999999999999999	999999999999999	410	1	1	9	10	1	1	0	999	3	999	1	24	16	1	38	50	1	92	1	999	1	32	40	99	99	99	99	1	2	2	2	2	2	5	3	2
302954	201903241630	13811404201	10	20190324	20:58:40	3456	1	10	1001	1001	999999999999999	999999999999999	396	1	6	9	24	1	1	0	999	6	90	2	33	9	2	38	50	1	58	1	999	1	30	40	99	99	99	99	1	2	2	2	2	1	6	2	2
302930	201903242441	15549044468	21	20190324	12:38:16	5022	1	18	1001	1001	999999999999999	999999999999999	385	1	1	9	10	1	1	10	100	7	95	2	31	16	2	38	10	1	77	1	999	1	32	40	99	99	99	99	1	2	2	2	2	1	10	1	2
302948	201903242767	13002205669	35	20190324	20:12:00	2232	67	18	1001	1001	18512280454	13602145639	396	1	6	5	24	1	1	999	999	1	999	1	28	16	1	52	50	1	999	99	999	9	99	99	99	99	99	99	9	9	9	9	9	9	999	9	3
302919	201903243127	13402297256	30	20190324	08:34:12	2382	1	18	1001	1001	999999999999999	999999999999999	389	1	6	9	24	1	1	999	999	2	999	1	20	13	1	70	50	1	999	99	999	9	99	99	99	99	99	99	9	9	9	9	9	9	999	9	4
302933	201903243379	15348429601	22	20190324	13:43:24	2437	1	18	1001	1001	999999999999999	999999999999999	404	1	1	9	10	1	1	80	90	1	0	2	33	7	2	43	50	1	999	99	999	9	99	99	99	99	99	99	9	9	9	9	9	9	999	9	3
302907	201903243617	15376772201	30	20190324	03:23:08	3617	1	18	1001	1001	999999999999999	999999999999999	383	1	1	9	10	1	1	15	100	2	75	2	25	15	1	34	50	1	94	0	999	1	32	40	99	99	99	99	1	2	2	2	2	2	5	3	2
302932	201903243783	15173714040	22	20190324	13:37:35	2694	1	18	1001	1001	999999999999999	999999999999999	315	1	6	9	11	5	2	20	80	2	15	2	45	9	3	35	50	1	82	0	999	1	32	40	99	99	99	99	2	2	2	2	2	2	4	3	2
302916	201903244355	17839181558	19	20190324	08:41:12	1649	1	18	1001	1001	999999999999999	999999999999999	404	1	1	9	10	1	1	999	60	1	0	2	39	6	1	35	50	1	999	99	999	9	99	99	99	99	99	99	9	9	9	9	9	9	999	9	3
302928	201903244537	18157060329	39	20190324	12:00:26	3594	1	18	1001	1001	999999999999999	999999999999999	404	1	1	9	10	1	1	5	80	2	50	1	22	10	1	70	20	1	81	0	999	1	32	40	99	99	99	99	1	2	2	1	1	2	7	2	2
302925	201903244570	15739013418	37	20190324	11:12:07	789	1	11	1001	1001	999999999999999	999999999999999	315	1	1	9	10	1	1	999	999	9	999	1	22	10	1	52	50	1	999	99	999	9	99	99	99	99	99	99	9	9	9	9	9	9	999	9	4
302947	201903244672	15371501915	24	20190324	19:11:37	3542	1	18	1001	1001	999999999999999	999999999999999	117	1	1	9	10	1	1	50	80	2	50	1	18	11	1	70	50	1	63	0	999	1	31	40	99	99	99	99	1	2	2	2	2	1	6	2	2
302940	201903245167	15609940792	37	20190324	17:07:37	3286	2	18	1001	1001	999999999999999	999999999999999	396	1	6	7	13	1	4	30	60	1	0	2	46	16	1	52	50	1	46	0	999	1	30	40	99	99	99	99	2	1	2	2	2	2	4	2	2
302918	201903245208	15347847102	15	20190324	08:52:24	3535	1	18	1001	1001	999999999999999	999999999999999	385	1	1	9	10	1	1	70	70	1	0	2	23	15	1	38	50	1	64	0	999	1	32	40	99	99	99	99	1	2	2	1	1	2	5	2	2
302912	201903245381	13434352377	14	20190324	06:54:52	3478	1	18	1001	1001	999999999999999	999999999999999	335	1	6	9	11	1	1	20	100	3	90	1	29	6	1	42	20	1	89	0	999	3	32	40	99	99	99	99	1	1	2	2	2	2	8	3	2
302904	201903245664	17674940498	10	20190324	00:12:16	2107	1	11	1001	1001	999999999999999	999999999999999	335	1	1	9	10	1	6	19	100	1	0	2	21	14	1	38	50	1	999	0	999	9	30	40	99	99	99	99	9	9	9	9	9	9	0	9	5
302909	201903245885	13522764566	10	20190324	05:59:14	3577	1	18	1001	1001	999999999999999	999999999999999	383	1	5	9	23	1	1	0	999	2	85	2	39	15	4	38	16	1	83	5	999	1	32	40	99	99	99	99	2	1	2	1	2	2	7	3	2
302936	201903245901	17762798991	21	20190324	16:01:29	2185	5	18	1001	1001	18907247828	999999999999999	396	1	6	9	16	1	1	85	75	1	0	2	46	9	6	21	50	1	999	99	999	9	99	99	99	99	99	99	9	9	9	9	9	9	999	9	3
302941	201903245904	15767169926	14	20190324	16:52:54	3118	2	18	1001	1001	999999999999999	999999999999999	117	1	1	9	10	1	1	65	65	1	0	2	18	12	1	70	50	1	57	0	999	1	31	40	99	99	99	99	1	2	1	2	2	2	4	2	2
302958	201903245951	13106753829	14	20190324	21:56:38	1949	1	18	1001	1001	999999999999999	999999999999999	410	1	1	9	10	1	1	0	100	2	80	1	22	15	1	38	50	1	56	0	999	1	32	40	99	99	99	99	2	1	2	2	2	2	6	3	2
302926	201903246110	15139634104	19	20190324	11:32:51	3507	1	18	1001	1001	999999999999999	999999999999999	315	1	1	9	10	1	1	20	60	2	35	2	22	15	1	70	50	1	78	0	999	1	32	40	99	99	99	99	2	2	2	2	2	1	5	3	2
302903	201903247104	17693330457	13	20190324	00:13:00	1071	1	11	1001	1001	999999999999999	999999999999999	408	1	1	9	10	1	1	15	90	2	90	2	19	12	1	70	50	1	999	99	999	9	99	99	99	99	99	99	9	9	9	9	9	9	999	9	3
302923	201903247713	17862882672	30	20190324	10:16:52	2938	1	18	1001	1001	999999999999999	999999999999999	385	1	1	9	10	1	1	70	65	1	0	2	22	14	1	70	2	1	39	0	999	1	30	40	99	99	99	99	2	2	2	2	2	2	1	2	2
302946	201903247902	13381264004	10	20190324	19:17:34	3396	1	18	1001	1001	999999999999999	999999999999999	386	1	1	9	10	1	1	55	85	1	0	2	30	15	1	44	9	1	82	0	999	1	32	40	99	99	99	99	2	2	2	2	2	2	2	2	2
302911	201903248338	18917644746	11	20190324	06:34:26	2994	1	18	1001	1001	999999999999999	999999999999999	408	1	6	5	11	5	2	10	90	3	60	1	18	11	1	70	50	1	86	0	999	1	32	40	99	99	99	99	1	1	2	2	2	1	11	2	2
302956	201903248788	13290780190	12	20190324	21:07:34	3216	1	18	1001	1001	999999999999999	999999999999999	386	1	1	9	10	1	1	30	85	2	10	1	22	15	1	88	50	1	69	0	999	1	32	40	99	99	99	99	2	2	1	2	2	2	5	2	2
302960	201903248975	13580947976	14	20190324	23:16:42	3339	1	18	1001	1001	999999999999999	999999999999999	396	1	1	9	10	1	1	50	80	2	90	2	33	15	1	38	11	1	42	0	999	3	30	40	99	99	99	99	1	2	2	2	2	2	5	2	2
302984	201903250186	15053209216	30	20190325	09:44:29	3505	1	18	1001	1001	999999999999999	999999999999999	387	1	1	9	10	1	1	80	80	2	50	1	32	15	2	38	50	1	56	1	999	1	32	40	99	99	99	99	2	2	2	2	2	2	4	3	2
303036	201903250278	18924812604	14	20190325	19:52:45	3617	1	18	1001	1001	999999999999999	999999999999999	316	1	6	9	24	1	1	30	80	2	30	1	35	9	2	38	50	1	78	0	999	1	32	40	99	99	99	99	1	2	2	1	2	1	5	2	2
302992	201903250296	15913880627	14	20190325	10:27:20	3494	1	18	1001	1001	999999999999999	999999999999999	411	1	1	9	10	1	1	0	55	2	20	2	29	16	1	52	50	1	56	0	999	1	32	40	99	99	99	99	2	2	2	2	2	2	4	3	2
303024	201903250431	17824839028	26	20190325	17:51:04	2387	1	18	1001	1001	999999999999999	999999999999999	385	1	6	5	11	1	1	50	90	2	0	1	18	12	1	70	1	1	999	99	999	9	99	99	99	99	99	99	9	9	9	9	9	9	999	9	3
303052	201903251291	17606696788	10	20190325	23:26:30	3618	1	18	1001	1001	999999999999999	999999999999999	385	1	2	9	10	1	1	45	90	2	80	2	24	9	1	52	1	1	62	1	999	1	31	40	99	99	99	99	1	2	2	2	2	2	6	2	2
302974	201903251575	18640881121	26	20190325	07:08:41	1726	1	18	1001	1001	999999999999999	999999999999999	386	1	6	5	11	5	2	10	100	2	50	1	43	16	2	38	50	1	999	0	999	9	30	40	99	99	99	99	9	9	9	9	9	9	1	9	5
302987	201903251603	18745357757	20	20190325	09:12:29	3508	1	18	1001	1001	999999999999999	999999999999999	391	1	1	9	10	1	1	0	100	2	80	1	28	12	2	52	50	1	51	0	999	5	32	40	99	99	99	99	1	1	2	1	2	1	10	3	2
303009	201903251757	18656196857	11	20190325	14:15:19	2463	1	18	1001	1001	999999999999999	999999999999999	411	1	3	9	10	1	1	15	85	2	90	2	23	16	1	20	50	1	35	2	999	1	30	40	99	99	99	99	1	1	2	1	2	2	8	3	2
303043	201903251810	17721449007	11	20190325	21:39:43	2598	1	18	1001	1001	999999999999999	999999999999999	316	1	1	9	10	1	1	999	999	2	100	2	28	15	1	38	50	1	25	0	999	1	30	40	99	99	99	99	1	1	1	2	2	2	7	2	2
302979	201903252149	18946784446	23	20190325	08:44:58	2947	2	18	1001	1001	999999999999999	999999999999999	403	1	6	1	11	1	1	45	80	1	0	2	18	12	1	70	50	1	81	5	999	1	32	40	99	99	99	99	1	1	2	2	1	1	9	2	2
302975	201903252320	18616903310	33	20190325	06:49:54	1364	1	18	1001	1001	999999999999999	999999999999999	117	1	6	5	25	1	1	999	999	2	999	1	35	15	1	52	19	1	999	99	999	9	99	99	99	99	99	99	9	9	9	9	9	9	999	9	4
303027	201903252695	17638321893	10	20190325	18:27:49	1904	1	11	1001	1001	999999999999999	999999999999999	404	1	1	9	10	1	1	50	50	1	0	1	18	12	1	38	99	1	999	99	999	9	99	99	99	99	99	99	9	9	9	9	9	9	999	9	3
302993	201903252817	15826367048	40	20190325	11:37:29	2567	1	18	1001	1001	999999999999999	999999999999999	391	1	6	9	11	5	7	100	100	1	0	2	18	12	1	70	50	1	999	99	999	9	99	99	99	99	99	99	9	9	9	9	9	9	999	9	3
303039	201903252840	18420237920	10	20190325	20:49:05	3467	1	18	1001	1001	999999999999999	999999999999999	404	1	6	9	25	1	2	70	80	2	50	2	18	11	1	38	50	1	68	0	999	1	32	40	99	99	99	99	1	1	2	2	2	2	6	2	2
302970	201903252895	17811982379	33	20190325	05:03:05	3387	1	18	1001	1001	999999999999999	999999999999999	396	1	6	7	11	1	1	10	80	1	0	1	28	18	1	52	4	1	52	1	999	1	31	40	99	99	99	99	1	2	2	2	2	1	6	2	2
303000	201903253062	13808929921	30	20190325	11:54:38	3600	1	18	1001	1001	999999999999999	999999999999999	403	1	1	1	10	1	1	25	70	2	70	1	24	16	1	52	50	1	37	0	999	1	31	40	99	99	99	99	1	1	2	2	2	2	6	3	2
303011	201903253391	13379179410	32	20190325	15:11:30	2977	1	18	1001	1001	999999999999999	999999999999999	383	1	1	9	10	1	1	65	80	2	50	2	27	15	1	52	50	1	67	0	999	1	32	40	99	99	99	99	1	1	2	2	2	2	6	3	2
302994	201903253591	13869140140	30	20190325	11:46:29	2820	1	11	1001	1001	999999999999999	999999999999999	412	1	1	9	10	1	1	70	100	1	0	1	22	99	1	70	50	1	45	0	999	1	31	40	99	99	99	99	1	2	2	2	2	2	2	3	2
303019	201903253671	17689989605	12	20190325	16:36:10	3027	1	11	1001	1001	999999999999999	999999999999999	404	1	6	9	23	1	1	50	85	2	80	1	18	12	1	70	50	1	53	1	999	1	31	40	99	99	99	99	2	2	2	2	2	1	6	2	2
302968	201903253766	15683315519	40	20190325	03:36:49	3572	1	18	1001	1001	999999999999999	999999999999999	410	1	1	9	10	1	1	0	100	2	50	1	24	16	2	52	50	1	74	0	999	1	30	40	99	99	99	99	1	2	2	2	2	2	5	3	2
303017	201903253968	17752791205	22	20190325	16:17:35	3588	1	18	1001	1001	999999999999999	999999999999999	408	1	6	9	11	1	1	30	95	2	70	2	29	15	2	21	50	1	97	0	999	2	32	40	99	99	99	99	1	1	2	2	2	1	8	3	2
302972	201903254055	17611735141	18	20190325	06:11:08	3210	1	18	1001	1001	999999999999999	999999999999999	396	1	6	7	11	1	1	10	80	2	50	1	29	18	1	39	2	1	67	1	999	1	32	40	99	99	99	99	1	2	2	2	2	1	7	2	2
303023	201903255234	13811059808	10	20190325	17:54:32	3679	1	18	1001	1001	999999999999999	999999999999999	316	1	1	9	10	1	1	85	70	1	0	1	30	18	1	38	50	1	20	0	999	1	30	40	99	99	99	99	2	1	2	2	2	2	3	3	2
303012	201903255536	18996645512	40	20190325	14:18:58	5805	2	18	1001	1001	13700687492	999999999999999	403	1	6	9	11	1	1	5	100	6	65	2	25	16	1	38	50	1	76	2	999	1	32	40	99	99	99	99	1	2	2	2	1	1	11	2	2
302983	201903255553	15605798273	39	20190325	08:31:05	3526	2	18	1001	1001	999999999999999	999999999999999	411	1	2	9	26	1	1	0	75	2	30	2	42	12	2	52	50	1	100	0	999	1	32	40	99	99	99	99	2	2	1	2	2	2	5	3	2
302981	201903255767	17633737940	19	20190325	08:38:04	1276	1	18	1001	1001	999999999999999	999999999999999	391	1	1	9	10	1	1	30	75	2	65	2	19	12	1	70	4	1	999	99	999	9	99	99	99	99	99	99	9	9	9	9	9	9	999	9	3
302964	201903255795	18812155070	18	20190325	01:25:57	3536	1	18	1001	1001	999999999999999	999999999999999	386	1	6	9	11	1	1	15	40	2	40	2	20	15	1	52	50	1	78	3	999	1	30	40	99	99	99	99	1	2	2	1	2	1	7	2	2
302998	201903256232	19857554377	39	20190325	12:21:49	3701	1	18	1001	1001	999999999999999	999999999999999	411	1	1	9	10	1	1	10	75	2	35	1	25	17	1	31	50	1	88	0	999	1	32	40	99	99	99	99	1	1	2	2	2	2	7	3	2
303010	201903256347	18335417176	31	20190325	14:11:25	3620	1	18	1001	1001	999999999999999	999999999999999	391	1	1	9	10	1	1	20	90	2	90	1	18	12	1	70	50	1	77	0	999	1	32	40	99	99	99	99	1	1	2	1	2	1	9	3	2
303020	201903256611	13896910712	40	20190325	16:49:21	1243	1	18	1001	1001	999999999999999	999999999999999	385	1	5	6	24	1	1	999	999	2	999	1	27	19	1	52	50	1	999	99	999	9	99	99	99	99	99	99	9	9	9	9	9	9	999	9	4
303002	201903256747	16692180601	19	20190325	13:12:30	5058	1	18	1001	1001	999999999999999	999999999999999	412	1	1	9	10	1	1	0	90	5	80	1	20	9	1	35	5	1	74	2	999	1	32	40	99	99	99	99	1	2	2	1	1	1	12	3	2
302961	201903256767	15904087996	26	20190325	00:11:15	2957	1	18	1001	1001	999999999999999	999999999999999	386	1	6	5	12	1	1	35	75	2	70	2	20	15	1	70	50	1	44	1	999	1	30	40	99	99	99	99	2	1	2	1	2	1	8	2	2
302963	201903257073	15381887176	39	20190325	00:42:30	3118	1	18	1001	1001	999999999999999	999999999999999	117	1	1	9	10	1	1	90	70	2	50	2	24	12	1	21	5	1	85	0	999	1	32	40	99	99	99	99	1	2	2	2	2	1	5	2	2
302962	201903257381	13869351215	30	20190325	00:21:52	1090	1	18	1001	1001	999999999999999	999999999999999	396	1	1	9	10	1	1	60	60	2	90	2	23	12	7	35	2	1	999	99	999	9	99	99	99	99	99	99	9	9	9	9	9	9	999	9	4
303028	201903257399	13535128502	14	20190325	19:22:24	1947	1	18	1001	1001	999999999999999	999999999999999	404	1	6	9	11	5	2	0	0	3	50	1	20	12	1	35	3	1	999	1	999	9	30	40	99	99	99	99	9	9	9	9	9	9	1	9	5
303045	201903257548	13684041592	34	20190325	22:29:06	3260	2	18	1001	1001	999999999999999	999999999999999	316	1	6	9	11	1	1	0	60	2	35	1	23	16	1	38	50	1	66	0	999	1	32	40	99	99	99	99	1	2	2	2	2	2	5	3	2
302966	201903257555	15179949254	25	20190325	01:48:55	3479	1	18	1001	1001	999999999999999	999999999999999	117	1	6	9	13	1	1	40	35	1	0	1	19	10	1	52	50	1	51	4	999	1	30	40	99	99	99	99	1	1	2	2	2	2	6	2	2
302978	201903258002	18571643141	21	20190325	08:19:22	3576	1	18	1001	1001	999999999999999	999999999999999	412	1	6	5	10	1	1	10	77	2	70	1	24	16	1	88	6	1	76	4	999	4	32	40	99	99	99	99	1	1	2	1	2	1	10	3	2
303008	201903258294	18810613515	10	20190325	14:50:03	887	1	14	1001	1001	999999999999999	999999999999999	387	1	1	9	10	1	1	999	999	9	999	1	20	12	1	35	50	1	999	99	999	9	99	99	99	99	99	99	9	9	9	9	9	9	999	9	4
302980	201903258685	18813089731	10	20190325	08:38:08	2478	1	14	1001	1001	999999999999999	999999999999999	383	1	1	9	10	1	1	999	100	1	0	1	22	18	1	70	6	1	76	0	999	1	32	40	99	99	99	99	2	1	2	2	2	2	4	3	2
303007	201903258769	15595730626	17	20190325	14:14:45	1058	1	18	1001	1001	999999999999999	999999999999999	387	1	1	9	10	1	1	999	999	2	90	1	27	16	1	38	50	1	999	99	999	9	99	99	99	99	99	99	9	9	9	9	9	9	999	9	4
303047	201903258849	18871556906	21	20190325	22:36:42	3486	1	18	1001	1001	999999999999999	999999999999999	404	1	1	9	10	1	1	40	999	2	95	1	18	12	1	70	50	1	77	4	999	1	32	40	99	99	99	99	1	2	2	2	2	2	5	2	2
302973	201903258899	13986938835	21	20190325	06:33:45	3457	2	18	1001	1001	999999999999999	999999999999999	410	1	6	9	23	1	1	1	100	2	98	1	23	16	1	35	1	1	73	1	999	1	32	40	99	99	99	99	1	1	2	1	1	1	11	3	2
303004	201903259068	15347786603	15	20190325	13:44:32	3363	1	18	1001	1001	999999999999999	999999999999999	383	1	6	9	24	5	1	55	999	1	0	2	38	12	2	52	50	1	25	0	999	1	30	40	99	99	99	99	2	1	1	1	2	2	4	3	2
303041	201903259278	15638558588	24	20190325	21:48:43	3522	1	18	1001	1001	999999999999999	999999999999999	408	1	1	9	10	1	1	65	75	2	40	2	30	15	4	44	50	1	81	1	999	3	32	40	99	99	99	99	1	1	2	1	2	1	10	2	2
303053	201903259377	19909110267	32	20190325	23:32:24	2244	1	88	1001	1001	999999999999999	999999999999999	402	1	1	9	10	1	1	50	999	1	0	2	25	16	1	20	50	1	999	99	999	9	99	99	99	99	99	99	9	9	9	9	9	9	999	9	3
303026	201903259416	13026554624	30	20190325	18:22:08	2895	1	18	1001	1001	999999999999999	999999999999999	408	1	1	9	10	1	1	20	80	2	95	2	18	9	1	52	50	1	44	0	999	1	30	40	99	99	99	99	1	2	2	2	2	1	5	2	2
303014	201903259689	18435696680	31	20190325	15:24:19	3569	1	18	1001	1001	999999999999999	999999999999999	412	1	1	9	10	1	1	35	70	1	0	1	40	15	4	38	50	1	49	0	999	1	32	40	99	99	99	99	1	2	2	2	2	2	3	3	2
303090	201903260478	15290807905	19	20190326	14:38:10	2333	1	18	1001	1001	999999999999999	999999999999999	412	1	6	9	12	1	2	20	98	5	100	1	21	12	1	70	50	1	999	99	999	9	99	99	99	99	99	99	9	9	9	9	9	9	999	9	3
303081	201903260495	13798818660	14	20190326	12:34:54	3500	1	13	1001	1001	999999999999999	999999999999999	406	1	2	2	10	1	1	90	80	1	0	1	36	16	2	39	11	1	4	0	999	1	30	40	99	99	99	99	2	2	2	2	2	2	1	2	2
303102	201903260919	13826095987	22	20190326	16:25:43	3508	1	18	1001	1001	999999999999999	999999999999999	387	1	1	9	10	1	1	60	40	1	0	1	28	15	1	21	50	1	86	0	999	1	32	40	99	99	99	99	1	1	2	2	2	2	5	3	2
303103	201903261107	17812112630	10	20190326	16:21:22	3631	1	18	1001	1001	999999999999999	999999999999999	315	1	6	9	11	5	2	5	85	2	85	1	18	12	1	70	70	1	60	0	999	1	30	40	99	99	99	99	1	2	2	2	2	1	6	2	2
303077	201903261174	13962221399	24	20190326	10:24:46	3292	1	15	1001	1001	999999999999999	999999999999999	411	1	6	9	12	5	3	15	45	2	85	2	52	17	2	31	50	1	79	2	999	1	32	40	99	99	99	99	2	2	2	2	2	2	4	3	2
303094	201903261664	13067160246	12	20190326	14:15:34	2433	2	18	1001	1001	999999999999999	999999999999999	411	1	6	7	12	5	3	25	85	2	65	1	19	13	1	70	50	1	999	99	999	9	99	99	99	99	99	99	9	9	9	9	9	9	999	9	3
303055	201903261973	15915823014	14	20190326	00:21:15	3561	9	18	1001	1001	999999999999999	999999999999999	402	1	7	6	11	5	2	50	100	6	85	1	24	14	1	44	50	1	84	4	999	1	32	40	99	99	99	99	1	1	1	1	1	1	12	2	2
303091	201903262041	17640266101	26	20190326	14:28:12	1227	1	18	1001	1001	999999999999999	999999999999999	332	1	6	9	16	1	1	999	999	6	999	2	20	12	1	70	50	1	999	99	999	9	99	99	99	99	99	99	9	9	9	9	9	9	999	9	4
303072	201903262436	15610598126	30	20190326	10:05:10	3037	1	18	1001	1001	999999999999999	999999999999999	406	1	1	1	10	1	1	80	90	2	15	2	26	16	1	39	7	1	62	0	999	1	32	40	99	99	99	99	2	2	2	2	2	1	4	2	2
303058	201903263560	15926661234	21	20190326	04:04:49	3229	1	18	1001	1001	999999999999999	999999999999999	408	1	1	9	10	1	1	20	90	2	60	2	27	15	1	38	50	1	57	0	999	1	30	40	99	99	99	99	1	1	2	2	1	2	8	3	2
303106	201903263693	19991192172	32	20190326	19:01:33	3878	1	18	1001	1001	999999999999999	999999999999999	315	1	6	9	11	1	1	15	45	1	0	2	24	15	1	38	1	1	76	4	999	1	32	40	99	99	99	99	2	2	2	2	1	2	5	3	2
303080	201903264252	17730213369	24	20190326	12:32:00	3799	1	18	1001	1001	999999999999999	999999999999999	412	1	1	9	10	1	1	10	90	2	65	2	24	15	1	52	70	1	93	0	999	1	30	40	99	99	99	99	1	2	1	2	2	2	6	3	2
303074	201903264268	15333143035	18	20190326	09:08:27	4626	2	18	1001	1001	13483880949	999999999999999	388	1	6	9	11	1	1	10	999	2	65	2	39	9	1	52	50	1	98	0	999	5	32	40	99	99	99	99	1	2	1	1	2	1	8	3	2
303071	201903264630	13397386512	22	20190326	09:47:20	2974	1	18	1001	1001	999999999999999	999999999999999	412	1	2	9	10	1	1	65	40	1	0	1	23	16	1	52	50	1	23	1	999	1	30	40	99	99	99	99	1	1	2	2	2	2	4	2	2
303096	201903265271	18853782379	30	20190326	15:06:43	2921	1	18	1001	1001	999999999999999	999999999999999	411	1	6	9	11	1	1	5	80	2	60	2	20	14	1	52	50	1	58	0	999	1	30	40	99	99	99	99	2	1	2	2	1	1	8	3	2
303067	201903265781	18311193515	10	20190326	08:22:05	2612	1	10	1001	1001	999999999999999	999999999999999	412	1	1	9	10	1	1	60	65	1	0	1	32	20	2	39	3	1	69	0	999	1	32	40	99	99	99	99	1	2	2	2	2	2	3	3	2
303092	201903265982	18238331513	19	20190326	14:38:58	3417	2	88	1001	1001	999999999999999	999999999999999	388	1	1	9	10	1	1	50	85	2	20	1	18	11	1	70	50	1	52	0	999	1	30	40	99	99	99	99	1	2	2	2	2	2	5	3	2
303068	201903266620	18037312331	19	20190326	08:08:03	2206	1	18	1001	1001	999999999999999	999999999999999	411	1	6	9	10	1	1	10	60	2	50	1	23	16	1	52	50	1	999	99	999	9	99	99	99	99	99	99	9	9	9	9	9	9	999	9	3
303111	201903266827	15036438737	19	20190326	23:26:42	3930	1	18	1001	1001	999999999999999	999999999999999	387	1	1	9	10	1	1	90	95	1	0	2	20	7	1	20	50	1	46	0	999	5	31	40	99	99	99	99	1	2	2	1	2	1	5	2	2
303059	201903267447	13922946405	12	20190326	04:18:02	3565	1	18	1001	1001	999999999999999	999999999999999	385	1	2	9	10	1	1	0	80	2	70	1	25	12	1	43	60	1	70	0	999	1	32	40	99	99	99	99	2	2	2	2	1	1	6	2	2
303084	201903268406	17864193681	30	20190326	12:30:08	4010	1	18	1001	1001	999999999999999	999999999999999	409	1	6	9	10	1	1	30	85	1	0	1	23	15	1	70	50	1	81	0	999	1	32	40	99	99	99	99	1	1	2	1	1	2	8	2	2
303108	201903268890	18856444295	11	20190326	20:51:09	3547	1	18	1001	1001	999999999999999	999999999999999	387	1	5	6	24	1	1	80	40	1	0	2	25	16	2	38	50	1	66	0	999	1	30	40	99	99	99	99	1	2	2	1	2	2	3	2	2
303165	201903270342	13855889895	11	20190327	22:59:18	3630	1	18	1001	1001	999999999999999	999999999999999	391	1	5	9	26	1	1	60	90	2	60	2	26	15	1	40	50	1	56	1	999	1	31	40	99	99	99	99	1	1	2	1	2	2	8	3	2
303126	201903271337	17746533634	19	20190327	08:23:38	3485	1	18	1001	1001	999999999999999	999999999999999	406	1	6	6	11	1	1	50	80	1	0	1	21	13	1	70	20	1	21	0	999	1	30	40	99	99	99	99	2	1	2	2	2	2	4	2	2
303119	201903272797	17665021901	14	20190327	04:34:55	2445	2	18	1001	1001	999999999999999	999999999999999	315	1	6	7	11	1	1	20	50	2	65	1	29	16	1	88	2	1	999	99	999	9	99	99	99	99	99	99	9	9	9	9	9	9	999	9	3
303140	201903273305	13363891969	18	20190327	16:18:36	3427	1	18	1001	1001	999999999999999	999999999999999	412	1	6	9	11	1	1	25	85	2	65	1	20	13	1	70	2	1	82	0	999	1	32	40	99	99	99	99	2	1	2	2	2	2	6	3	2
303136	201903274063	15629633559	21	20190327	13:40:54	1061	1	99	1001	1001	999999999999999	999999999999999	409	1	9	9	99	9	9	999	999	2	999	2	23	15	1	52	99	1	999	99	999	9	99	99	99	99	99	99	9	9	9	9	9	9	999	9	4
303122	201903274633	13829971863	14	20190327	06:16:29	3313	1	18	1001	1001	999999999999999	999999999999999	315	1	1	9	10	1	1	0	100	3	55	2	34	9	4	52	50	1	89	0	999	4	32	40	99	99	99	99	1	2	2	2	2	1	7	3	2
303144	201903275008	13202547000	23	20190327	17:48:02	3619	1	18	1001	1001	999999999999999	999999999999999	412	1	5	9	10	1	1	0	100	5	100	2	32	12	4	44	50	1	96	2	999	5	32	40	99	99	99	99	1	1	2	1	2	1	13	3	2
303116	201903275532	13920299783	35	20190327	01:59:47	3038	2	18	1001	1001	999999999999999	999999999999999	390	1	1	1	10	1	1	50	80	1	0	1	32	15	1	35	50	1	23	0	999	1	30	40	99	99	99	99	2	2	2	1	2	2	3	3	2
303151	201903276253	15511920968	18	20190327	18:09:43	3690	1	18	1001	1001	999999999999999	999999999999999	391	1	1	9	10	1	1	60	50	1	0	1	24	10	1	35	50	1	23	0	999	1	30	40	99	99	99	99	2	1	2	2	2	1	4	3	2
303159	201903277025	17806066979	30	20190327	20:43:26	3621	1	18	1001	1001	999999999999999	999999999999999	391	1	1	9	10	1	1	20	70	1	0	2	18	8	1	21	3	1	51	0	999	1	32	40	99	99	99	99	1	2	2	1	1	2	6	3	2
303133	201903277199	18918796611	33	20190327	13:05:02	3522	1	18	1001	1001	999999999999999	999999999999999	388	1	1	9	10	1	1	5	85	2	85	2	29	16	1	38	3	1	82	0	999	1	32	40	99	99	99	99	2	2	2	2	2	2	4	3	2
303117	201903277384	15051759345	39	20190327	03:17:30	2913	1	18	1001	1001	999999999999999	999999999999999	315	1	1	9	10	1	1	80	80	1	0	2	19	7	1	38	60	1	85	0	999	4	32	40	99	99	99	99	2	2	1	2	2	1	5	3	2
303164	201903278390	17625861094	39	20190327	23:32:58	2626	1	18	1001	1001	999999999999999	999999999999999	412	1	6	9	11	1	1	50	95	2	80	2	20	15	1	70	60	1	80	0	999	1	32	40	99	99	99	99	1	1	2	2	2	2	7	3	2
303121	201903278490	18656402160	11	20190327	06:45:45	3579	1	18	1001	1001	999999999999999	999999999999999	387	1	5	9	24	1	1	50	75	2	50	1	26	18	1	52	50	1	74	1	999	1	31	40	99	99	99	99	1	1	2	2	2	2	8	3	2
303114	201903279058	13393410853	31	20190327	00:36:02	2017	1	18	1001	1001	999999999999999	999999999999999	387	1	1	9	10	1	1	999	999	2	999	2	20	12	1	52	50	1	999	99	999	9	99	99	99	99	99	99	9	9	9	9	9	9	999	9	3
303138	201903279196	17600519132	18	20190327	14:29:14	3789	1	18	1001	1001	999999999999999	999999999999999	409	1	6	9	16	1	1	5	100	1	0	2	22	12	1	41	1	1	83	6	999	1	32	40	99	99	99	99	1	1	2	1	1	1	10	2	2
303153	201903279650	13931803297	18	20190327	18:12:04	3617	2	18	1001	1001	999999999999999	999999999999999	332	1	6	7	13	1	1	0	50	1	0	2	35	8	4	52	50	1	89	0	999	1	32	40	99	99	99	99	1	2	2	1	2	2	5	2	2
303156	201903279781	17766965215	17	20190327	19:51:15	3686	1	18	1001	1001	999999999999999	999999999999999	332	1	6	5	11	1	1	20	80	2	85	1	18	12	1	70	70	1	72	0	999	1	32	40	99	99	99	99	1	2	2	2	2	1	6	3	2
303147	201903279785	13263385012	10	20190327	16:17:48	3651	1	18	1001	1001	999999999999999	999999999999999	332	1	6	5	11	5	2	50	90	1	0	2	21	14	1	70	2	1	57	1	999	1	31	40	99	99	99	99	2	2	2	2	2	1	5	3	2
303186	201903280468	15537303660	19	20190328	08:11:11	3246	1	18	1001	1001	999999999999999	999999999999999	408	1	5	9	26	1	1	10	100	2	80	1	24	18	1	70	50	1	82	0	999	1	32	40	99	99	99	99	1	1	2	2	2	1	8	3	2
303223	201903280511	15299386863	37	20190328	17:25:25	3007	1	18	1001	1001	999999999999999	999999999999999	409	1	1	9	24	1	1	80	60	2	74	2	19	9	1	52	50	1	60	0	999	4	31	40	99	99	99	99	1	1	2	2	1	1	9	2	2
303204	201903281024	13340135938	25	20190328	12:26:52	1939	2	18	1001	1001	999999999999999	999999999999999	396	1	6	9	11	1	1	0	100	2	100	2	48	12	2	38	50	1	69	0	999	1	32	40	99	99	99	99	1	2	2	2	2	2	5	2	2
303232	201903281044	18973814362	22	20190328	20:17:16	2448	1	18	1001	1001	999999999999999	999999999999999	388	1	1	9	10	1	1	30	60	2	75	2	26	15	1	99	50	1	54	1	999	1	30	40	99	99	99	99	2	2	2	2	2	2	5	3	2
303235	201903282885	13666939853	12	20190328	20:47:38	3188	1	18	1001	1001	999999999999999	999999999999999	389	1	1	9	10	1	1	60	0	1	0	1	26	15	1	38	50	1	14	0	999	1	30	40	99	99	99	99	1	1	2	2	2	2	3	2	2
303219	201903283057	13670553859	14	20190328	16:35:55	3677	2	18	1001	1001	999999999999999	999999999999999	406	1	2	2	10	1	1	5	80	1	0	1	32	6	1	52	50	1	81	0	999	1	32	40	99	99	99	99	1	2	2	2	2	2	4	2	2
303237	201903283129	18711959528	22	20190328	22:56:32	3216	1	18	1001	1001	999999999999999	999999999999999	409	1	6	9	11	1	1	60	80	1	0	2	19	13	1	70	1	1	41	0	999	1	30	40	99	99	99	99	2	2	2	1	2	2	2	2	2
303183	201903283550	13015692345	12	20190328	07:22:02	899	1	18	1001	1001	999999999999999	999999999999999	411	1	1	9	10	1	1	20	100	2	50	2	24	9	1	38	50	1	999	99	999	9	99	99	99	99	99	99	9	9	9	9	9	9	999	9	4
303205	201903283908	15375569690	11	20190328	12:42:41	1890	1	18	1001	1001	999999999999999	999999999999999	383	1	1	9	10	1	1	0	80	2	80	2	32	16	2	44	50	1	92	0	999	1	32	40	99	99	99	99	1	1	1	2	2	1	9	3	2
303166	201903284271	18737653183	19	20190328	00:42:23	3674	1	18	1001	1001	999999999999999	999999999999999	412	1	1	9	10	1	1	50	80	2	75	1	25	16	1	52	1	1	90	3	999	1	32	40	99	99	99	99	1	2	2	2	2	2	6	3	2
303228	201903284701	18363975081	35	20190328	19:53:04	3182	1	18	1001	1001	999999999999999	999999999999999	406	1	1	1	10	1	1	20	80	2	60	1	27	16	1	35	2	1	67	0	999	1	32	40	99	99	99	99	2	1	2	2	2	2	6	2	2
303192	201903284778	15122627702	35	20190328	08:52:30	1385	1	18	1001	1001	999999999999999	999999999999999	377	1	1	9	10	1	1	999	100	2	100	2	21	9	1	21	6	1	999	99	999	9	99	99	99	99	99	99	9	9	9	9	9	9	999	9	3
303178	201903284985	18268130015	39	20190328	05:43:50	3551	1	18	1001	1001	999999999999999	999999999999999	391	1	6	9	11	5	2	30	60	2	55	1	21	14	1	70	50	1	71	0	999	1	32	40	99	99	99	99	2	1	2	2	2	1	7	3	2
303226	201903285132	18512548261	24	20190328	19:01:06	1168	1	18	1001	1001	999999999999999	999999999999999	406	1	1	1	10	1	1	60	80	1	0	1	24	15	1	35	2	1	999	99	999	9	99	99	99	99	99	99	9	9	9	9	9	9	999	9	4
303224	201903285852	17377432176	15	20190328	16:48:24	3512	1	18	1001	1001	999999999999999	999999999999999	389	1	1	9	10	1	1	50	80	1	0	2	18	9	1	70	50	1	58	1	999	1	30	40	99	99	99	99	2	1	2	2	2	2	7	2	2
303238	201903286272	19822732039	33	20190328	23:26:26	2535	1	18	1001	1001	999999999999999	999999999999999	389	1	6	9	23	1	1	80	98	1	0	2	33	9	2	38	1	1	999	99	999	9	99	99	99	99	99	99	9	9	9	9	9	9	999	9	3
303198	201903286948	15850518238	24	20190328	10:21:58	5838	1	18	1001	1001	999999999999999	999999999999999	401	1	1	9	10	1	1	25	80	5	50	2	27	15	1	35	50	1	82	1	999	1	32	40	99	99	99	99	1	1	2	2	2	1	12	2	2
[truncated: 8,501 more rows]
[truncated: 206 more columns]
