# Supplementary material for: Mental health problems among hotline callers during the early stage of COVID-19 pandemic
Source: PeerJ. 2022 May 23;10:e13419. doi: 10.7717/peerj.13419 (PMC9135033; doi:10.7717/peerj.13419)
Supplement: Supplemental Information 2 [file peerj-10-13419-s002.xls]

## Sheet: Sheet1
plan	1 no ideation,2 ideation without plan,3 passive plan,4 possible plan,5 active plan,6 make attempt in last 14 days, 7 making currently attempt, 9 unknown
sex	1 female, 2 male
marital	1 never married,2 currently married,3 seperated, 4 divorced,5 widowed,6 remarried, 7 co-habiting,8 other,9 unknown
work	10 peasant, 20 currently worker,21 unstable work,22police,31doctor,32 nurse,33 other medical personnel,34 other counselling personnel,35 other service personnel,38 other technical worker,39 teacher,40 administrative, 41military,42service industries,43 temporary worker,44 self-employed,50 sick leave,51 unemployed,52 laid off,53 no work,60 retired, 70 student,88 other occupation,99 unknown
plan.end	1 no ideation,2 ideation without plan,3 passive plan,4 possible plan,5 active plan,6 make attempt in last 14 days, 7 making currently attempt, 9 unknown
reliable	1 worse, 2average, 3good,9 unknown
chronle	1 yes, 2 no
acutele	1 yes, 2 no
illness	1 yes, 2 no
abused	1 yes, 2 no
fearviol	1 yes, 2 no
famsuic	1 yes, 2 no
problem111-prolbem 942	1 no present, 2present
famprob	1 no present, 2present
relprob	1 no present, 2present
econprob	1 no present, 2present
workprob	1 no present, 2present
schprob	1 no present, 2present
psyprob	1 no present, 2present
dxprob	1 no present, 2present
miscprob	1 no present, 2present
infoprob	1 no present, 2present
othpprob	1 no present, 2present
diffprob	1 no present, 2present
diffcall	1 no present, 2present
